# Supplementary material for: A Robust Supramolecular Heterosynthon Assembled by a Hydrogen Bond and a Chalcogen Bond
Source: MDPI journal article supplement (doi:10.3390/cryst11111309), 2021-10-27
Supplement: s1 [file s1]

Archive with 2 entries (2 files):
- crystals-1397336.cif
- The checkCIF reports.pdf
