# Supplementary material for: A Robust Supramolecular Heterosynthon Assembled by a Hydrogen Bond and a Chalcogen Bond
Source: MDPI journal article supplement (doi:10.3390/cryst11111309), 2021-10-27
Supplement: s1 [file s1 › crystals-1397336.cif]

data_2090225
_audit_creation_date               2020-10-15
_audit_creation_method
;
Olex2 1.2
(compiled 2018.05.29 svn.r3508 for OlexSys, GUI svn.r5506)
;
_shelx_SHELXL_version_number       '2014/7'
_audit_contact_author_address      'Luoyang Normal University'
_audit_contact_author_email        'wzw@lynu.edu.cn'
_audit_contact_author_name         'Weizhou Wang'
_audit_contact_author_phone        '+86-13633799150'
_publ_contact_author_id_orcid      '0000-0002-4309-9077'
_publ_section_references
;
Dolomanov, O.V., Bourhis, L.J., Gildea, R.J, Howard, J.A.K. & Puschmann, H.
 (2009), J. Appl. Cryst. 42, 339-341.

Sheldrick, G.M. (2015). Acta Cryst. A71, 3-8.

Sheldrick, G.M. (2015). Acta Cryst. C71, 3-8.
;
_chemical_name_common              ?
_chemical_name_systematic          ?
_chemical_formula_moiety           'C6 H4 N2 Se, 2(C8 H6 O4)'
_chemical_formula_sum              'C22 H16 N2 O8 Se'
_chemical_formula_weight           515.33
_chemical_melting_point            ?
loop_
  _atom_type_symbol
  _atom_type_description
  _atom_type_scat_dispersion_real
  _atom_type_scat_dispersion_imag
  _atom_type_scat_source
 'C' 'C' 0.0033 0.0016 'International Tables Vol C Tables 4.2.6.8 and 6.1.1.4'
 'H' 'H' 0.0000 0.0000 'International Tables Vol C Tables 4.2.6.8 and 6.1.1.4'
 'N' 'N' 0.0061 0.0033 'International Tables Vol C Tables 4.2.6.8 and 6.1.1.4'
 'O' 'O' 0.0106 0.0060 'International Tables Vol C Tables 4.2.6.8 and 6.1.1.4'
 'Se' 'Se' -0.0929 2.2259
 'International Tables Vol C Tables 4.2.6.8 and 6.1.1.4'

_shelx_space_group_comment
;
The symmetry employed for this shelxl refinement is uniquely defined
by the following loop, which should always be used as a source of
symmetry information in preference to the above space-group names.
They are only intended as comments.
;
_space_group_crystal_system        'monoclinic'
_space_group_IT_number             15
_space_group_name_H-M_alt          'C 1 2/c 1'
_space_group_name_Hall             '-C 2yc'
loop_
  _space_group_symop_operation_xyz
 'x, y, z'
 '-x, y, -z+1/2'
 'x+1/2, y+1/2, z'
 '-x+1/2, y+1/2, -z+1/2'
 '-x, -y, -z'
 'x, -y, z-1/2'
 '-x+1/2, -y+1/2, -z'
 'x+1/2, -y+1/2, z-1/2'

_cell_length_a                     10.4027(7)
_cell_length_b                     14.8477(7)
_cell_length_c                     13.9101(8)
_cell_angle_alpha                  90
_cell_angle_beta                   101.425(6)
_cell_angle_gamma                  90
_cell_volume                       2105.9(2)
_cell_formula_units_Z              4
_cell_measurement_reflns_used      2905
_cell_measurement_temperature      290
_cell_measurement_theta_max        24.1930
_cell_measurement_theta_min        4.0370
_shelx_estimated_absorpt_T_max     ?
_shelx_estimated_absorpt_T_min     ?
_exptl_absorpt_coefficient_mu      1.837
_exptl_absorpt_correction_T_max    1.00000
_exptl_absorpt_correction_T_min    0.44007
_exptl_absorpt_correction_type     multi-scan
_exptl_absorpt_process_details
;
CrysAlisPro 1.171.40.53 (Rigaku Oxford Diffraction, 2019)
Empirical absorption correction using spherical harmonics,
 implemented in SCALE3 ABSPACK scaling algorithm.
;
_exptl_absorpt_special_details     ?
_exptl_crystal_colour              colourless
_exptl_crystal_colour_primary      colourless
_exptl_crystal_density_diffrn      1.625
_exptl_crystal_density_meas        ?
_exptl_crystal_density_method      ?
_exptl_crystal_description         block
_exptl_crystal_F_000               1040
_exptl_crystal_size_max            0.27
_exptl_crystal_size_mid            0.25
_exptl_crystal_size_min            0.22
_exptl_transmission_factor_max     ?
_exptl_transmission_factor_min     ?
_diffrn_reflns_av_R_equivalents    0.0539
_diffrn_reflns_av_unetI/netI       0.0552
_diffrn_reflns_Laue_measured_fraction_full  0.997
_diffrn_reflns_Laue_measured_fraction_max  0.900
_diffrn_reflns_limit_h_max         13
_diffrn_reflns_limit_h_min         -13
_diffrn_reflns_limit_k_max         19
_diffrn_reflns_limit_k_min         -19
_diffrn_reflns_limit_l_max         18
_diffrn_reflns_limit_l_min         -18
_diffrn_reflns_number              12212
_diffrn_reflns_point_group_measured_fraction_full  0.997
_diffrn_reflns_point_group_measured_fraction_max  0.900
_diffrn_reflns_theta_full          25.242
_diffrn_reflns_theta_max           28.449
_diffrn_reflns_theta_min           3.527
_diffrn_ambient_temperature        290
_diffrn_detector                   'CCD plate'
_diffrn_detector_area_resol_mean   8.0584
_diffrn_detector_type              EosS2
_diffrn_measured_fraction_theta_full  0.997
_diffrn_measured_fraction_theta_max  0.900
_diffrn_measurement_details
;
List of Runs (angles in degrees, time in seconds):

  # Type    Start    End  Width  t~exp~   \w     \q     \k     \f   Frames
--------------------------------------------------------------------------
  1  \w    -20.00  25.00   1.00   11.89    --  -13.49 -99.00-120.00   45
  2  \w    -86.00 -35.00   1.00   11.89    --  -13.49-178.00 120.00   51
  3  \w     -2.00  82.00   1.00   11.89    --   14.89  57.00 120.00   84
  4  \w    -20.00  54.00   1.00   11.89    --   14.89 -99.00-180.00   74
  5  \w     -2.00  82.00   1.00   11.89    --   14.89  57.00  60.00   84
  6  \w    -54.00  34.00   1.00   11.89    --   14.89 -38.00 -90.00   88
  7  \w    -32.00  56.00   1.00   11.89    --  -13.49  38.00  60.00   88
  8  \w     -2.00  27.00   1.00   11.89    --   14.89  57.00 -30.00   29
;
_diffrn_measurement_device         'four-circle diffractometer'
_diffrn_measurement_device_type   
 'SuperNova, Single source at offset/far, EosS2'
_diffrn_measurement_method         '\w scans'
_diffrn_orient_matrix_type        
 'CrysAlisPro convention (1999,Acta A55,543-557)'
_diffrn_orient_matrix_UB_11        -0.0306180000
_diffrn_orient_matrix_UB_12        0.0303308000
_diffrn_orient_matrix_UB_13        -0.0369010000
_diffrn_orient_matrix_UB_21        -0.0001398000
_diffrn_orient_matrix_UB_22        -0.0338154000
_diffrn_orient_matrix_UB_23        -0.0360529000
_diffrn_orient_matrix_UB_31        -0.0624459000
_diffrn_orient_matrix_UB_32        -0.0148012000
_diffrn_orient_matrix_UB_33        0.0067158000
_diffrn_radiation_monochromator    mirror
_diffrn_radiation_probe            x-ray
_diffrn_radiation_type             MoK\a
_diffrn_radiation_wavelength       0.71073
_diffrn_source                     'micro-focus sealed X-ray tube'
_diffrn_source_type                'SuperNova (Mo) X-ray Source'
_reflns_Friedel_coverage           0.000
_reflns_Friedel_fraction_full      .
_reflns_Friedel_fraction_max       .
_reflns_number_gt                  1766
_reflns_number_total               2387
_reflns_odcompleteness_completeness  99.60
_reflns_odcompleteness_iscentric   1
_reflns_odcompleteness_theta       25.30
_reflns_special_details
;
 Reflections were merged by SHELXL according to the crystal
 class for the calculation of statistics and refinement.
 
 _reflns_Friedel_fraction is defined as the number of unique
 Friedel pairs measured divided by the number that would be
 possible theoretically, ignoring centric projections and
 systematic absences.
;
_reflns_threshold_expression       'I > 2\s(I)'
_computing_cell_refinement         'CrysAlisPro 1.171.40.53 (Rigaku OD, 2019)'
_computing_data_collection         'CrysAlisPro 1.171.40.53 (Rigaku OD, 2019)'
_computing_data_reduction          'CrysAlisPro 1.171.40.53 (Rigaku OD, 2019)'
_computing_molecular_graphics      'Olex2 (Dolomanov et al., 2009)'
_computing_publication_material    'Olex2 (Dolomanov et al., 2009)'
_computing_structure_refinement    'ShelXL (Sheldrick, 2015)'
_computing_structure_solution      'ShelXT (Sheldrick, 2015)'
_refine_diff_density_max           0.342
_refine_diff_density_min           -0.281
_refine_diff_density_rms           0.065
_refine_ls_extinction_coef         .
_refine_ls_extinction_method       none
_refine_ls_goodness_of_fit_ref     1.131
_refine_ls_hydrogen_treatment      constr
_refine_ls_matrix_type             full
_refine_ls_number_parameters       152
_refine_ls_number_reflns           2387
_refine_ls_number_restraints       0
_refine_ls_R_factor_all            0.0850
_refine_ls_R_factor_gt             0.0548
_refine_ls_restrained_S_all        1.131
_refine_ls_shift/su_max            0.000
_refine_ls_shift/su_mean           0.000
_refine_ls_structure_factor_coef   Fsqd
_refine_ls_weighting_details      
 'w=1/[\s^2^(Fo^2^)+(0.0231P)^2^+3.3146P] where P=(Fo^2^+2Fc^2^)/3'
_refine_ls_weighting_scheme        calc
_refine_ls_wR_factor_gt            0.0901
_refine_ls_wR_factor_ref           0.0988
_refine_special_details            ?
_olex2_refinement_description
;
1. Fixed Uiso
 At 1.2 times of:
  All C(H) groups
 At 1.5 times of:
  All O(H) groups
2.a Aromatic/amide H refined with riding coordinates:
 C10(H10), C11(H11), C2(H2), C4(H4), C5(H5), C6(H6)
2.b Idealised tetrahedral OH refined as rotating group:
 O1(H1), O3(H3)
;
_atom_sites_solution_hydrogens     geom
_atom_sites_solution_primary       dual
_atom_sites_solution_secondary     ?
loop_
  _atom_site_label
  _atom_site_type_symbol
  _atom_site_fract_x
  _atom_site_fract_y
  _atom_site_fract_z
  _atom_site_U_iso_or_equiv
  _atom_site_adp_type
  _atom_site_occupancy
  _atom_site_site_symmetry_order
  _atom_site_calc_flag
  _atom_site_refinement_flags_posn
  _atom_site_refinement_flags_adp
  _atom_site_refinement_flags_occupancy
  _atom_site_disorder_assembly
  _atom_site_disorder_group
 Se1 Se 0.5000 0.24957(3) 0.2500 0.04080(18) Uani 1 2 d S T P . .
 N1 N 0.5262(3) 0.33268(18) 0.34482(18) 0.0374(7) Uani 1 1 d . . . . .
 C9 C 0.5140(3) 0.4131(2) 0.3024(2) 0.0354(8) Uani 1 1 d . . . . .
 C10 C 0.5280(4) 0.4968(3) 0.3543(3) 0.0495(10) Uani 1 1 d . . . . .
 H10 H 0.5468 0.4981 0.4225 0.059 Uiso 1 1 calc R . . . .
 C11 C 0.5133(4) 0.5737(2) 0.3017(3) 0.0590(11) Uani 1 1 d . . . . .
 H11 H 0.5208 0.6285 0.3346 0.071 Uiso 1 1 calc R . . . .
 O1 O 0.7346(3) 0.13238(17) 0.96158(17) 0.0581(7) Uani 1 1 d . . . . .
 H1 H 0.7434 0.1658 1.0094 0.087 Uiso 1 1 calc GR . . . .
 O2 O 0.7208(3) 0.26303(16) 0.88134(16) 0.0535(7) Uani 1 1 d . . . . .
 O3 O 0.5871(3) 0.26552(16) 0.52937(17) 0.0629(8) Uani 1 1 d . . . . .
 H3 H 0.5708 0.2898 0.4753 0.094 Uiso 1 1 calc GR . . . .
 O4 O 0.5790(3) 0.14117(17) 0.43930(17) 0.0619(8) Uani 1 1 d . . . . .
 C1 C 0.6843(3) 0.1279(2) 0.7899(2) 0.0342(8) Uani 1 1 d . . . . .
 C2 C 0.6561(3) 0.1747(2) 0.7016(2) 0.0361(8) Uani 1 1 d . . . . .
 H2 H 0.6555 0.2374 0.7019 0.043 Uiso 1 1 calc R . . . .
 C3 C 0.6289(3) 0.1287(2) 0.6131(2) 0.0354(8) Uani 1 1 d . . . . .
 C4 C 0.6312(3) 0.0357(2) 0.6134(3) 0.0432(9) Uani 1 1 d . . . . .
 H4 H 0.6153 0.0044 0.5543 0.052 Uiso 1 1 calc R . . . .
 C5 C 0.6572(3) -0.0114(2) 0.7013(3) 0.0461(9) Uani 1 1 d . . . . .
 H5 H 0.6573 -0.0741 0.7008 0.055 Uiso 1 1 calc R . . . .
 C6 C 0.6829(3) 0.0343(2) 0.7893(3) 0.0415(9) Uani 1 1 d . . . . .
 H6 H 0.6992 0.0026 0.8481 0.050 Uiso 1 1 calc R . . . .
 C7 C 0.7141(3) 0.1805(3) 0.8818(2) 0.0374(8) Uani 1 1 d . . . . .
 C8 C 0.5964(3) 0.1774(3) 0.5183(2) 0.0419(9) Uani 1 1 d . . . . .

loop_
  _atom_site_aniso_label
  _atom_site_aniso_U_11
  _atom_site_aniso_U_22
  _atom_site_aniso_U_33
  _atom_site_aniso_U_23
  _atom_site_aniso_U_13
  _atom_site_aniso_U_12
 Se1 0.0544(3) 0.0301(3) 0.0387(3) 0.000 0.0112(2) 0.000
 N1 0.0454(18) 0.0407(17) 0.0266(14) 0.0006(12) 0.0083(13) -0.0011(13)
 C9 0.0359(19) 0.0355(19) 0.0355(17) -0.0002(15) 0.0091(16) -0.0009(15)
 C10 0.048(2) 0.049(2) 0.051(2) -0.0169(19) 0.0092(19) -0.0032(19)
 C11 0.047(2) 0.035(2) 0.094(3) -0.014(2) 0.011(3) -0.0023(19)
 O1 0.092(2) 0.0510(16) 0.0279(13) 0.0074(11) 0.0039(14) -0.0002(15)
 O2 0.087(2) 0.0382(16) 0.0327(13) -0.0002(11) 0.0050(13) 0.0102(13)
 O3 0.109(2) 0.0450(18) 0.0310(13) 0.0021(11) 0.0065(15) 0.0130(15)
 O4 0.102(2) 0.0521(17) 0.0288(14) -0.0068(12) 0.0051(14) -0.0114(15)
 C1 0.0330(19) 0.039(2) 0.0303(17) 0.0012(14) 0.0050(14) 0.0036(15)
 C2 0.039(2) 0.0359(19) 0.0335(18) 0.0003(14) 0.0081(15) 0.0030(15)
 C3 0.0335(19) 0.041(2) 0.0308(18) -0.0021(14) 0.0049(15) -0.0026(15)
 C4 0.045(2) 0.045(2) 0.038(2) -0.0069(16) 0.0036(17) -0.0083(17)
 C5 0.049(2) 0.038(2) 0.050(2) 0.0002(17) 0.0060(18) -0.0073(17)
 C6 0.041(2) 0.043(2) 0.040(2) 0.0086(16) 0.0075(16) 0.0009(17)
 C7 0.038(2) 0.045(2) 0.0283(18) 0.0036(15) 0.0048(15) 0.0054(16)
 C8 0.044(2) 0.048(2) 0.032(2) -0.0020(16) 0.0038(16) -0.0041(17)

_geom_special_details
;
 All esds (except the esd in the dihedral angle between two l.s. planes)
 are estimated using the full covariance matrix.  The cell esds are taken
 into account individually in the estimation of esds in distances, angles
 and torsion angles; correlations between esds in cell parameters are only
 used when they are defined by crystal symmetry.  An approximate (isotropic)
 treatment of cell esds is used for estimating esds involving l.s. planes.
;
loop_
  _geom_bond_atom_site_label_1
  _geom_bond_atom_site_label_2
  _geom_bond_distance
  _geom_bond_site_symmetry_2
  _geom_bond_publ_flag
 Se1 N1 1.787(3) 2_655 ?
 Se1 N1 1.787(3) . ?
 N1 C9 1.327(4) . ?
 C9 C9 1.429(6) 2_655 ?
 C9 C10 1.430(4) . ?
 C10 H10 0.9300 . ?
 C10 C11 1.349(5) . ?
 C11 C11 1.409(8) 2_655 ?
 C11 H11 0.9300 . ?
 O1 H1 0.8200 . ?
 O1 C7 1.302(4) . ?
 O2 C7 1.227(4) . ?
 O3 H3 0.8200 . ?
 O3 C8 1.323(4) . ?
 O4 C8 1.204(4) . ?
 C1 C2 1.391(4) . ?
 C1 C6 1.390(4) . ?
 C1 C7 1.477(4) . ?
 C2 H2 0.9300 . ?
 C2 C3 1.388(4) . ?
 C3 C4 1.381(5) . ?
 C3 C8 1.483(4) . ?
 C4 H4 0.9300 . ?
 C4 C5 1.388(5) . ?
 C5 H5 0.9300 . ?
 C5 C6 1.379(5) . ?
 C6 H6 0.9300 . ?

loop_
  _geom_angle_atom_site_label_1
  _geom_angle_atom_site_label_2
  _geom_angle_atom_site_label_3
  _geom_angle
  _geom_angle_site_symmetry_1
  _geom_angle_site_symmetry_3
  _geom_angle_publ_flag
 N1 Se1 N1 92.66(17) 2_655 . ?
 C9 N1 Se1 107.8(2) . . ?
 N1 C9 C9 115.85(17) . 2_655 ?
 N1 C9 C10 124.5(3) . . ?
 C9 C9 C10 119.7(2) 2_655 . ?
 C9 C10 H10 120.9 . . ?
 C11 C10 C9 118.1(3) . . ?
 C11 C10 H10 120.9 . . ?
 C10 C11 C11 122.2(2) . 2_655 ?
 C10 C11 H11 118.9 . . ?
 C11 C11 H11 118.9 2_655 . ?
 C7 O1 H1 109.5 . . ?
 C8 O3 H3 109.5 . . ?
 C2 C1 C7 118.1(3) . . ?
 C6 C1 C2 119.6(3) . . ?
 C6 C1 C7 122.3(3) . . ?
 C1 C2 H2 119.7 . . ?
 C3 C2 C1 120.5(3) . . ?
 C3 C2 H2 119.7 . . ?
 C2 C3 C8 121.3(3) . . ?
 C4 C3 C2 119.3(3) . . ?
 C4 C3 C8 119.4(3) . . ?
 C3 C4 H4 119.7 . . ?
 C3 C4 C5 120.5(3) . . ?
 C5 C4 H4 119.7 . . ?
 C4 C5 H5 119.9 . . ?
 C6 C5 C4 120.2(3) . . ?
 C6 C5 H5 119.9 . . ?
 C1 C6 H6 120.1 . . ?
 C5 C6 C1 119.9(3) . . ?
 C5 C6 H6 120.1 . . ?
 O1 C7 C1 114.7(3) . . ?
 O2 C7 O1 123.5(3) . . ?
 O2 C7 C1 121.7(3) . . ?
 O3 C8 C3 112.8(3) . . ?
 O4 C8 O3 123.2(3) . . ?
 O4 C8 C3 124.1(3) . . ?

loop_
  _geom_hbond_atom_site_label_D
  _geom_hbond_atom_site_label_H
  _geom_hbond_atom_site_label_A
  _geom_hbond_distance_DH
  _geom_hbond_distance_HA
  _geom_hbond_distance_DA
  _geom_hbond_angle_DHA
  _geom_hbond_site_symmetry_A
 O1 H1 O2 0.82 1.83 2.646(3) 174.6 7_657
 O3 H3 N1 0.82 1.89 2.709(3) 173.5 .

loop_
  _refln_index_h
  _refln_index_k
  _refln_index_l
  _refln_F_squared_meas
  _refln_F_squared_sigma
 -13 3 4 6.18 6
 -13 3 5 9.95 6.76
 -13 5 3 6.17 4.88
 -13 5 4 1.09 4.48
 -13 5 5 9.28 6.09
 -13 5 6 4.85 5.27
 -13 5 7 7.38 6.51
 -12 0 -4 10.28 5.73
 -12 0 -3 4.12 3.39
 -12 0 -2 -0.77 2.78
 -12 0 -1 -0.02 2.15
 -12 -2 -5 3.21 4.91
 -12 -2 -4 20.57 7.79
 -12 -2 -3 5.5 3.89
 -12 2 -3 -0.74 3.58
 -12 2 -2 13.48 6.67
 -12 -2 -2 17.86 6.37
 -12 -2 -1 1.94 4.14
 -12 2 4 11.11 5.92
 -12 2 5 17.91 7.03
 -12 2 6 8.88 5.26
 -12 2 7 9.2 5.64
 -12 4 2 8.74 4.85
 -12 4 3 10.89 6.79
 -12 4 4 30.58 9.66
 -12 4 5 -2.33 4.86
 -12 4 6 17.38 7.37
 -12 4 7 10.4 5.83
 -12 4 8 12.62 6.49
 -12 4 9 4.46 4.21
 -12 6 1 -2.85 5.3
 -12 6 2 6.37 4.88
 -12 6 3 -6.79 6.07
 -12 6 4 4.78 5.68
 -12 6 5 10.54 7.06
 -12 6 6 21.67 8.43
 -12 6 7 1.32 3.07
 -12 6 8 14.86 8.21
 -12 6 9 10.94 7.75
 -12 6 10 3.75 3.77
 -11 1 -6 4.66 4.39
 -11 -1 -6 0.93 2.58
 -11 1 -5 7.21 5.11
 -11 -1 -5 4 3.46
 -11 1 -4 11.73 5.63
 -11 -1 -4 0.69 2.73
 -11 -1 -3 13.13 5.82
 -11 1 -3 -1.54 3.98
 -11 1 -2 12.34 5.57
 -11 -1 -2 5.08 4.18
 -11 1 -1 12.78 5.89
 -11 -1 -1 16.33 5.09
 -11 -1 0 -0.32 2.42
 -11 1 4 0.58 2.63
 -11 1 5 10.78 5.26
 -11 1 6 4.91 4.55
 -11 1 7 22.48 6.67
 -11 1 8 -1.75 2.56
 -11 -3 -6 -8.26 6.06
 -11 3 -5 26.99 8.62
 -11 -3 -5 24.04 7.4
 -11 3 -4 3.3 4.61
 -11 -3 -4 4.71 4.42
 -11 3 -3 20.86 6.87
 -11 -3 -3 33.82 8.17
 -11 -3 -2 4.34 2.82
 -11 3 -2 -4.06 3.23
 -11 -3 -1 28.43 7.08
 -11 -3 0 -4.15 3.02
 -11 3 2 5.67 4.62
 -11 3 3 26.31 8.54
 -11 3 4 1.85 3.67
 -11 3 5 28.64 8.35
 -11 3 6 5.14 4.32
 -11 3 7 22.85 7.48
 -11 3 8 5.82 4.9
 -11 3 9 2.77 3.22
 -11 3 10 2.99 3.39
 -11 -5 -6 -0.32 3.52
 -11 -5 -5 5.03 4.55
 -11 -5 -4 8.69 4.89
 -11 5 -4 2.44 3.9
 -11 5 -3 16.13 6.65
 -11 -5 -3 13.07 5.6
 -11 5 1 11.51 7.04
 -11 5 2 3.72 4.44
 -11 5 3 24.15 8.54
 -11 5 4 8.2 4.79
 -11 5 5 11.57 6.87
 -11 5 6 3.16 5.27
 -11 5 7 32.84 9.85
 -11 5 8 3.54 2.62
 -11 5 9 40.03 11.1
 -11 5 10 0.28 5.1
 -11 5 11 9.53 6.51
 -11 5 12 6.58 5.82
 -11 7 0 4.74 5.06
 -11 7 1 17.67 8.28
 -11 7 2 5.7 5.37
 -11 7 3 22.55 9.1
 -11 7 4 9.11 6.36
 -11 7 5 11.74 6.65
 -11 7 6 6.29 6.26
 -11 7 7 18.71 8.2
 -11 7 8 0.33 3.91
 -11 7 9 23.21 8.91
 -11 7 10 0.71 4.12
 -11 7 11 9.87 5.86
 -11 9 2 2.76 4.1
 -11 9 3 7.08 6.36
 -11 -9 4 8.83 6.03
 -11 9 4 5.24 6.34
 -11 -9 5 2.16 3.4
 -11 9 5 -2.47 4.38
 -11 9 6 1.53 3.54
 -11 -11 1 2.84 4.47
 -11 -11 2 -2.1 4.22
 -11 -11 3 15.35 7.6
 -10 0 -7 2.03 3.73
 -10 0 -6 0.56 3.81
 -10 0 -5 -1.85 3.02
 -10 0 -4 16.42 6.08
 -10 0 -3 5.8 4.18
 -10 0 -2 3.84 3.42
 -10 0 -1 -2.38 2.76
 -10 0 0 61.75 9.63
 -10 0 4 95.64 12.5
 -10 0 5 1.29 2.38
 -10 0 6 21.49 5.95
 -10 0 7 4 3.26
 -10 0 8 5.26 3.18
 -10 0 9 -1.57 2.63
 -10 -2 -8 5.9 3.43
 -10 -2 -7 8.21 5.23
 -10 2 -7 5.37 4.94
 -10 2 -6 22.4 7.57
 -10 -2 -6 24.03 8.08
 -10 -2 -5 -1.05 2.38
 -10 2 -5 6.41 4.46
 -10 2 -4 17.29 6.34
 -10 -2 -4 16.98 5.75
 -10 -2 -3 6.35 4.58
 -10 2 -3 5.53 5.88
 -10 2 -2 4.12 3.43
 -10 -2 -2 -0.54 1.86
 -10 2 -1 -0.22 2.78
 -10 -2 -1 4.31 3.1
 -10 -2 0 47.6 7.97
 -10 -2 1 1.96 2.48
 -10 2 2 36.73 8.87
 -10 2 3 2.03 3.17
 -10 2 4 15.54 5.46
 -10 2 5 9.52 4.77
 -10 2 6 25.14 7.25
 -10 -2 6 22.05 5.62
 -10 2 7 -1.04 2.88
 -10 2 8 56.37 10.64
 -10 2 9 4.16 4.29
 -10 2 10 40.15 9.44
 -10 2 11 7.21 5.01
 -10 -4 -8 11.84 6.73
 -10 -4 -7 1.33 2.53
 -10 -4 -6 35.7 9.23
 -10 4 -6 16.47 6.93
 -10 4 -5 -2.29 2.67
 -10 -4 -5 2.88 4.26
 -10 -4 -4 10.18 4.86
 -10 4 -4 31.86 8.72
 -10 -4 -3 20.83 6.19
 -10 4 -3 18.37 6.44
 -10 -4 -2 8.57 3.93
 -10 4 -2 1.96 2.37
 -10 -4 -1 12.96 4.52
 -10 -4 0 15.52 4.59
 -10 4 0 9.68 5.6
 -10 -4 1 2.48 1.96
 -10 4 1 6.69 4.78
 -10 4 2 39.17 10.29
 -10 4 3 0.98 3.22
 -10 4 4 21.46 7.47
 -10 4 5 -2.19 2.53
 -10 4 6 11.96 5.89
 -10 4 7 5.19 4.65
 -10 4 8 31.99 8.82
 -10 4 9 11.83 6.17
 -10 4 10 43.08 10.53
 -10 4 11 -3.86 4.07
 -10 4 12 18.09 8.14
 -10 4 13 8.77 6.66
 -10 -6 -8 9.6 5.24
 -10 -6 -7 8.86 5.09
 -10 -6 -6 10.33 5.4
 -10 6 -5 3.98 4.54
 -10 -6 -5 2.43 4.05
 -10 6 -4 38.73 9.83
 -10 -6 -4 23.48 6.67
 -10 6 -3 3.09 3.76
 -10 -6 -3 3.89 3.61
 -10 -6 -2 53.97 9.04
 -10 -6 -1 7.1 3.58
 -10 6 -1 0.98 2.6
 -10 6 0 56.17 12.37
 -10 6 1 10.56 6.01
 -10 6 2 56.99 12.08
 -10 6 3 -0.66 2.98
 -10 6 4 24.57 8.79
 -10 6 5 2.22 3.81
 -10 6 6 47.71 11.69
 -10 6 7 1.05 4.33
 -10 6 8 13.64 7.14
 -10 6 9 -1.13 3.22
 -10 6 10 6.42 5.2
 -10 6 11 4.01 6.02
 -10 6 12 2.13 3.33
 -10 6 13 6.34 6.56
 -10 8 -2 46.98 12.39
 -10 8 -1 -1.75 2.62
 -10 8 0 11.69 7.04
 -10 8 1 6.64 5.52
 -10 -8 2 11.83 5.45
 -10 8 2 9.25 5.44
 -10 -8 3 5.64 3.76
 -10 8 3 -0.21 2.83
 -10 -8 4 19.73 7.09
 -10 8 4 11.83 6.74
 -10 -8 5 2.63 4.66
 -10 8 5 0.06 5.31
 -10 -8 6 39.67 10.73
 -10 8 6 28.18 10.1
 -10 -8 7 6.23 5.32
 -10 8 7 5.98 4.46
 -10 -8 8 -0.39 2.98
 -10 8 8 -2.27 4.31
 -10 -8 9 4.58 3.97
 -10 8 9 0.26 3.53
 -10 8 10 11.91 5.86
 -10 8 11 -9 6.3
 -10 10 -1 17.2 7.54
 -10 -10 0 18.98 7.09
 -10 10 0 1.37 3.84
 -10 -10 1 -2.45 3.83
 -10 10 1 -1.11 3.03
 -10 -10 2 11.37 6.46
 -10 10 2 7.67 6.04
 -10 -10 3 -2.42 4.09
 -10 10 3 5.08 5.96
 -10 -10 4 11.49 6.74
 -10 10 4 16.98 8.47
 -10 -10 5 3.48 4.8
 -10 10 5 5.48 6.28
 -10 -10 6 9.95 5.9
 -10 10 6 6.68 4.48
 -10 -10 7 -6.19 5.59
 -10 10 7 -1.86 3.74
 -10 -12 0 14.14 6.73
 -10 -12 1 8.47 6.25
 -10 -12 2 40.41 11.64
 -10 -12 3 -4.34 3.93
 -10 -12 4 27.03 9.66
 -9 -1 -9 4.51 6.1
 -9 1 -9 10.39 5.89
 -9 -1 -8 31.77 8.38
 -9 1 -8 33.75 9.38
 -9 1 -7 12.45 6.03
 -9 -1 -7 4.35 3.79
 -9 -1 -6 -2.27 2.62
 -9 1 -6 4.98 4.27
 -9 -1 -5 31.7 8.06
 -9 1 -5 25.42 7.28
 -9 1 -4 5.16 4.31
 -9 -1 -4 3.44 2.7
 -9 1 -3 23.51 6.46
 -9 -1 -3 21.57 6.04
 -9 -1 -2 15.34 5.12
 -9 1 -2 4.12 3.27
 -9 1 -1 43.06 8.06
 -9 -1 -1 54.43 8.66
 -9 -1 0 6.86 3.47
 -9 1 0 2.72 2.37
 -9 -1 1 51.9 7.67
 -9 1 2 196.57 18.42
 -9 1 3 392.54 25.32
 -9 1 4 58.49 9.69
 -9 -1 4 73.41 9.97
 -9 1 5 51.12 8.95
 -9 -1 5 51.3 8.06
 -9 1 6 4.5 3.24
 -9 -1 6 0.86 1.5
 -9 -1 7 30.06 6.29
 -9 1 7 23.96 6.43
 -9 -1 8 2.54 2.62
 -9 1 8 5.03 3.98
 -9 1 9 19.83 6.16
 -9 -1 9 26.77 6.24
 -9 1 10 4.5 4.03
 -9 -1 10 -0.13 1.68
 -9 1 11 44.22 9.51
 -9 1 12 2.1 2.51
 -9 1 13 5.31 4.37
 -9 -1 13 -3.61 4.95
 -9 1 14 42.1 12.31
 -9 -3 -9 44.2 10.84
 -9 -3 -8 3.21 4.21
 -9 3 -8 0.18 3.33
 -9 -3 -7 25.41 7.82
 -9 3 -7 18.4 6.77
 -9 3 -6 -4.84 4.19
 -9 -3 -6 12.32 5.74
 -9 3 -5 38.68 8.51
 -9 -3 -5 36.09 7.93
 -9 3 -4 -0.05 3.22
 -9 -3 -4 3.4 2.58
 -9 3 -3 42.8 8.47
 -9 -3 -3 50.35 8.83
 -9 3 -2 5.68 3.47
 -9 -3 -2 -1.49 2.05
 -9 -3 -1 54.95 8.16
 -9 3 -1 57.93 9.67
 -9 -3 0 23.59 5.42
 -9 3 0 14.38 5.74
 -9 -3 1 20.57 4.67
 -9 3 1 32.9 8.56
 -9 3 2 10.59 5.41
 -9 3 3 83.77 13.46
 -9 3 4 1.61 2.76
 -9 3 5 40.52 9
 -9 3 6 13.06 5.79
 -9 -3 7 33.74 5.54
 -9 3 7 34.82 8.54
 -9 3 8 -0.18 2.7
 -9 3 9 4.32 3.2
 -9 3 10 -0.39 3.9
 -9 3 11 28.55 8.64
 -9 -3 12 4.43 6.39
 -9 3 12 9.11 5.43
 -9 -3 13 34.25 12.16
 -9 3 13 61.72 12.87
 -9 3 14 7.3 5.68
 -9 -5 -9 18.13 8.2
 -9 5 -8 9.49 5.71
 -9 -5 -8 0.52 3.43
 -9 -5 -7 8.19 4.58
 -9 5 -7 9.89 4.86
 -9 5 -6 14.5 6.47
 -9 -5 -6 14.12 6.14
 -9 -5 -5 44.51 8.95
 -9 5 -5 57.63 11.17
 -9 -5 -4 3.72 3.28
 -9 5 -4 -3.07 4.08
 -9 -5 -3 59.97 9.38
 -9 5 -3 45.21 9.21
 -9 -5 -2 3.4 2.8
 -9 5 -2 6.19 4.47
 -9 -5 -1 26.88 5.91
 -9 5 -1 38.34 9.93
 -9 -5 0 4.72 2.68
 -9 5 0 -2.36 3.8
 -9 -5 1 32.45 5.48
 -9 5 1 55.51 13.58
 -9 5 2 5.08 3.51
 -9 5 3 12.09 5.36
 -9 5 4 -0.49 3.26
 -9 5 5 57.41 11.21
 -9 -5 6 6.72 4.83
 -9 5 6 2.53 4.72
 -9 -5 7 51.23 11.15
 -9 5 7 43.71 10.74
 -9 -5 8 7.89 4.62
 -9 5 8 7.13 4.21
 -9 -5 9 40.45 10.66
 -9 5 9 54.14 11.84
 -9 5 10 1.63 2.83
 -9 5 11 26.37 8.49
 -9 5 12 13.31 6.73
 -9 5 13 11.13 4.64
 -9 5 14 5.57 4.34
 -9 5 15 10.45 7
 -9 -7 -9 -0.5 2.74
 -9 -7 -8 2.64 3.45
 -9 -7 -7 10.11 5.76
 -9 7 -7 19.5 6.38
 -9 -7 -6 4.28 4.02
 -9 7 -6 17.62 7.14
 -9 -7 -5 24.09 6.99
 -9 7 -5 17.04 6.88
 -9 -7 -4 -3.25 3.34
 -9 7 -4 7.79 4.89
 -9 7 -3 41.08 9.65
 -9 -7 -3 34.24 7
 -9 -7 -2 4.02 2.52
 -9 7 -2 2.45 3.91
 -9 -7 -1 46.1 7.1
 -9 7 -1 47.86 11.71
 -9 -7 0 -1.16 1.39
 -9 7 0 2.03 4.8
 -9 -7 1 23.84 7.31
 -9 7 1 13.6 5.78
 -9 -7 2 17.44 6.27
 -9 7 2 16.29 6.83
 -9 -7 3 13.74 5.96
 -9 7 3 16.61 6.49
 -9 -7 4 10.04 5.09
 -9 7 4 6.58 4.93
 -9 -7 5 41.57 10
 -9 7 5 36.68 9.78
 -9 -7 6 1.19 3.65
 -9 7 6 4.21 4.92
 -9 -7 7 36.07 9.49
 -9 7 7 42.68 10.93
 -9 -7 8 -5.06 3.39
 -9 7 8 6.13 5.47
 -9 -7 9 20.54 7.96
 -9 7 9 41.11 11.02
 -9 -7 10 1.8 4.71
 -9 7 10 2.12 3.71
 -9 -7 11 -0.05 3.36
 -9 7 11 15.45 7.31
 -9 -7 12 15.31 7.68
 -9 7 12 2.23 4.3
 -9 7 13 8.98 6.08
 -9 -9 -8 -0.26 3.74
 -9 -9 -7 14.07 6.35
 -9 -9 -6 -2.06 2.87
 -9 9 -5 12.56 6.01
 -9 9 -3 22.04 8.54
 -9 -9 -2 -0.23 1.76
 -9 9 -2 2.8 4.87
 -9 -9 -1 12.66 5.27
 -9 9 -1 0.71 4.08
 -9 -9 0 4.97 4.12
 -9 9 0 7.93 5.28
 -9 -9 1 31.77 8.56
 -9 9 1 19.5 7.29
 -9 -9 2 5.62 4.37
 -9 9 2 1.88 4.07
 -9 -9 3 79.28 13.58
 -9 9 3 71.57 14.72
 -9 -9 4 4.13 4.01
 -9 9 4 8.4 5.98
 -9 -9 5 33.43 9.7
 -9 9 5 34.56 10.56
 -9 -9 6 4.28 5.08
 -9 9 6 7.93 5.73
 -9 -9 7 35.5 10.22
 -9 9 7 18.73 8.18
 -9 -9 8 5.95 5.11
 -9 9 8 -0.79 3.89
 -9 -9 9 67.98 14.66
 -9 9 9 68.66 15.53
 -9 -9 10 -1.12 3.51
 -9 9 10 -2.2 4.66
 -9 9 11 17.31 8.9
 -9 11 -3 32.96 10.51
 -9 11 -2 13.59 7.11
 -9 -11 -1 17.53 6.51
 -9 11 -1 31.26 10.34
 -9 -11 0 5.63 5.19
 -9 11 0 -7.62 6.51
 -9 -11 1 7.2 4.17
 -9 11 1 19.31 9.41
 -9 -11 2 2.83 4.02
 -9 11 2 1.22 2.91
 -9 -11 3 22.96 8.82
 -9 11 3 16.11 8.73
 -9 -11 4 18.39 7.38
 -9 11 4 9.32 6.67
 -9 -11 5 18.98 7.88
 -9 11 5 26.28 9.51
 -9 -11 6 2.79 3.58
 -9 11 6 -0.68 3.49
 -9 -11 7 4.36 4.48
 -9 11 7 4.39 4.6
 -9 11 8 7.81 5
 -9 -13 0 8.62 5.08
 -9 -13 1 28.39 9.34
 -9 -13 2 -5.63 4.87
 -9 -13 3 25.64 9.21
 -9 -13 4 6.33 6.15
 -8 0 -10 12.77 5.3
 -8 0 -9 7.45 6.18
 -8 0 -8 139.22 16.81
 -8 0 -7 3.76 4.52
 -8 0 -6 15.47 5.36
 -8 0 -5 0.51 1.71
 -8 0 -4 2.42 2.54
 -8 0 -3 0.42 2.11
 -8 0 -2 66.33 9.34
 -8 0 -1 -1.67 1.7
 -8 0 0 160.59 13.33
 -8 0 1 3.55 2.18
 -8 0 2 32.94 7.23
 -8 0 3 2.32 1.83
 -8 0 4 46.4 8.05
 -8 0 5 2.88 3.48
 -8 0 6 93.26 11.02
 -8 0 7 -0.31 1.48
 -8 0 8 21.98 5.61
 -8 0 9 0.2 1.91
 -8 0 10 24.09 8.57
 -8 0 10 31.08 7.13
 -8 0 11 3.59 3.4
 -8 0 11 3.17 3.76
 -8 0 12 87.96 15.96
 -8 0 12 50.24 9.61
 -8 0 13 0.19 3.54
 -8 0 13 2.43 3.14
 -8 0 14 208.86 26.3
 -8 0 15 10.7 7.46
 -8 -2 -10 26.3 8.32
 -8 2 -10 27.69 8.43
 -8 2 -9 -1.54 3.71
 -8 -2 -9 19.57 7.54
 -8 2 -8 48.57 10.61
 -8 -2 -8 56.86 10.96
 -8 -2 -7 9.17 5.08
 -8 2 -7 4.81 3.25
 -8 -2 -6 25.01 6.79
 -8 2 -6 13.01 5.65
 -8 -2 -5 4.86 3.35
 -8 2 -5 4.42 2.93
 -8 2 -4 107.1 13.21
 -8 -2 -4 122.81 13.37
 -8 -2 -3 19.61 3.68
 -8 2 -3 22.59 6.49
 -8 -2 -3 24.32 5.74
 -8 2 -2 163.17 15.32
 -8 -2 -2 154.96 13.8
 -8 2 -1 1.24 2.33
 -8 -2 -1 1.65 1.81
 -8 2 0 52.42 8.33
 -8 -2 0 61.52 7.85
 -8 2 0 58.16 10.27
 -8 -2 1 2.61 2.15
 -8 2 1 1.79 2.5
 -8 2 2 39.4 8.26
 -8 2 3 32.32 7.16
 -8 -2 4 88.19 9.42
 -8 2 4 87.88 11.88
 -8 -2 5 5.98 2.76
 -8 2 5 6.42 3.85
 -8 2 6 170.31 16.49
 -8 -2 6 154.54 12.29
 -8 2 7 7.61 4.28
 -8 -2 7 0.69 1.04
 -8 -2 8 29.67 5.83
 -8 2 8 29.79 7.33
 -8 2 9 1.83 3.06
 -8 -2 9 1.64 1.39
 -8 -2 10 30.3 8.84
 -8 2 10 60.31 10.75
 -8 -2 10 35.95 6.46
 -8 2 11 -2.54 3.21
 -8 -2 11 -2.73 5.07
 -8 2 11 3.94 4.04
 -8 2 12 37.01 10.5
 -8 -2 12 29.72 9.8
 -8 2 12 28.3 7.97
 -8 -2 13 22.36 10.01
 -8 2 13 32.38 10.42
 -8 2 13 8.76 4.94
 -8 2 14 46.13 12.36
 -8 -2 14 27.64 9.92
 -8 2 14 36.96 9.84
 -8 2 15 5.01 5.87
 -8 -4 -10 18.32 7.08
 -8 -4 -9 1.5 2.52
 -8 4 -9 7.81 4.99
 -8 -4 -8 43.27 9.77
 -8 4 -8 36.88 9.04
 -8 -4 -7 -2.88 3.11
 -8 4 -7 3.03 3.48
 -8 -4 -6 37.29 8.43
 -8 4 -6 36.45 8.45
 -8 -4 -5 0.73 3.23
 -8 4 -5 5.11 3.1
 -8 4 -4 113.61 14.03
 -8 -4 -4 103.1 12.15
 -8 4 -3 12.58 4.8
 -8 -4 -3 6.67 3.13
 -8 -4 -2 85.54 9.83
 -8 4 -2 92.26 11.82
 -8 -4 -1 4.21 2.58
 -8 4 -1 1.21 2.73
 -8 4 -1 5.3 3.42
 -8 -4 0 40.8 6.03
 -8 4 0 40.15 9.27
 -8 -4 1 0.19 1.28
 -8 4 1 5.96 4.47
 -8 -4 2 85.69 7.69
 -8 4 2 84.65 12.73
 -8 4 3 1.75 2.97
 -8 -4 4 18.05 5.86
 -8 4 4 12.27 5.25
 -8 -4 5 -2.26 3.35
 -8 4 5 0.75 2.57
 -8 -4 6 132.43 16.29
 -8 4 6 109.18 14.63
 -8 -4 7 33.37 8.36
 -8 4 7 30.25 7.86
 -8 -4 8 27.03 8
 -8 4 8 16.17 6.35
 -8 -4 9 6.32 4.22
 -8 4 9 11.77 5.46
 -8 -4 10 40.57 11.24
 -8 -4 10 41.46 10.21
 -8 4 10 40.11 9.55
 -8 -4 11 4 5.57
 -8 4 11 3.15 2.74
 -8 4 12 49.18 11.65
 -8 -4 12 50.44 12.5
 -8 4 12 50.34 11.53
 -8 -4 13 1.8 3.05
 -8 4 13 7.45 4.71
 -8 -4 14 3.29 5.26
 -8 4 14 9.98 6.92
 -8 4 14 4.52 5.44
 -8 4 15 5.53 4.92
 -8 4 15 0.46 3.29
 -8 4 16 19.09 9.24
 -8 -6 -10 6.6 5.68
 -8 -6 -9 -1.54 4.35
 -8 6 -9 3.51 4.18
 -8 -6 -8 -0.44 3.27
 -8 6 -8 2.93 3.15
 -8 -6 -7 -0.63 2.76
 -8 6 -7 1.68 2.42
 -8 -6 -6 0.75 2.27
 -8 6 -6 10.46 5.31
 -8 -6 -5 7.42 4.34
 -8 6 -5 0.6 2.5
 -8 -6 -4 30.97 6.8
 -8 6 -4 25.25 7.42
 -8 -6 -3 9.37 4.09
 -8 6 -3 3.26 3.45
 -8 6 -2 91.35 12.32
 -8 -6 -2 97.35 10.56
 -8 6 -2 82.94 13.65
 -8 -6 -1 -2.93 2.23
 -8 6 -1 3.25 3.97
 -8 -6 0 91.55 12.14
 -8 -6 0 96.99 8.99
 -8 6 0 98.66 14.63
 -8 -6 1 1.19 2.31
 -8 -6 1 0.82 1.43
 -8 6 1 1.79 3.17
 -8 -6 2 117.77 14.51
 -8 -6 2 132.78 8.67
 -8 6 2 144.6 17.59
 -8 -6 3 1.63 2.44
 -8 6 3 3.97 3.85
 -8 -6 4 130.37 16.15
 -8 6 4 99.06 14.79
 -8 -6 5 -2.82 4.21
 -8 6 5 2.32 3.88
 -8 -6 6 234.96 22.31
 -8 6 6 202.99 21.25
 -8 -6 7 0.41 3.46
 -8 6 7 1.11 3.95
 -8 -6 8 78.93 13.58
 -8 6 8 99.91 15.73
 -8 -6 9 0.79 3.9
 -8 6 9 -1.79 3.37
 -8 -6 10 19.25 7.97
 -8 -6 10 28.08 8.72
 -8 6 10 11.16 5.93
 -8 -6 11 1.64 3.27
 -8 -6 11 -2.21 3.39
 -8 6 11 0.02 2.85
 -8 -6 12 6.34 7.2
 -8 -6 12 3.06 3.81
 -8 6 12 0.04 3.23
 -8 -6 13 -4.12 5.83
 -8 -6 13 -1.72 3.47
 -8 6 13 0.32 4.28
 -8 6 14 1.44 3.75
 -8 -6 14 2.85 3.86
 -8 6 14 3.41 3.33
 -8 6 15 8.93 6.49
 -8 6 15 -0.3 3.53
 -8 -8 -9 5.75 3.39
 -8 -8 -8 25.82 7.76
 -8 8 -8 29.96 8.64
 -8 -8 -7 3.07 2.99
 -8 8 -7 15.03 6.89
 -8 8 -6 58.28 11.25
 -8 -8 -6 64.17 11
 -8 8 -5 12.27 6.41
 -8 -8 -5 4.2 3.66
 -8 8 -4 12.26 5.95
 -8 -8 -4 6.55 3.35
 -8 8 -3 5.59 4.51
 -8 -8 -3 4.13 3.47
 -8 8 -3 8.95 6.03
 -8 -8 -2 36.96 7.9
 -8 -8 -2 23.47 5.61
 -8 8 -2 31.58 9.09
 -8 -8 -1 -0.12 1.76
 -8 -8 -1 0.87 1.74
 -8 8 -1 3.78 4.88
 -8 -8 0 24.29 7.14
 -8 -8 0 39.7 5.56
 -8 8 0 31.74 9.12
 -8 -8 1 -0.64 2.47
 -8 -8 1 0.17 1.18
 -8 8 1 0.75 2.57
 -8 -8 2 22.25 6.83
 -8 8 2 20.95 7.18
 -8 -8 3 31.29 8.35
 -8 8 3 19.48 7.3
 -8 -8 4 36.92 9.3
 -8 8 4 21.28 7.27
 -8 -8 5 10.22 5.71
 -8 8 5 8.69 5.8
 -8 -8 6 36.7 9.37
 -8 8 6 28.26 8.82
 -8 -8 7 3.82 4.66
 -8 8 7 -2.38 3.41
 -8 -8 8 81.52 14.98
 -8 8 8 88.71 15.61
 -8 -8 9 3.76 4.44
 -8 8 9 8.15 5.33
 -8 -8 10 43.8 11.36
 -8 8 10 67.99 14.4
 -8 -8 11 5.58 5.48
 -8 -8 11 5.19 4.67
 -8 8 11 4.59 4.98
 -8 -8 12 27.59 9.89
 -8 -8 12 19.57 8.41
 -8 8 12 25.35 9.24
 -8 8 13 17.34 8.28
 -8 -10 -9 10.45 5.98
 -8 -10 -8 23.69 8.42
 -8 -10 -7 8.73 5.2
 -8 10 -6 7.34 4.89
 -8 -10 -6 14.47 6.29
 -8 -10 -5 4.26 2.93
 -8 -10 -4 5.78 3.67
 -8 10 -4 6.99 4.65
 -8 -10 -3 38.79 8.26
 -8 10 -3 47.21 11.78
 -8 -10 -2 29.5 7.53
 -8 10 -2 24.07 8.6
 -8 -10 -1 2.52 3.29
 -8 10 -1 -1.44 2.86
 -8 -10 0 22.29 7.08
 -8 10 0 26.77 9.01
 -8 -10 1 8.83 4.98
 -8 10 1 6.3 5.65
 -8 -10 2 26.62 8.32
 -8 10 2 18.84 6.94
 -8 -10 3 3.84 4.62
 -8 10 3 -0.62 3.46
 -8 -10 4 30.53 8.59
 -8 10 4 25.4 8.61
 -8 -10 5 6.43 4.93
 -8 10 5 9.42 6.39
 -8 -10 6 52.16 11.19
 -8 10 6 48.54 12.22
 -8 -10 7 24.42 9.04
 -8 10 7 19.68 7.84
 -8 -10 8 42.28 10.98
 -8 10 8 64.74 13.87
 -8 -10 9 6.63 5.12
 -8 10 9 30.87 10.12
 -8 -10 10 16.98 7.36
 -8 10 10 29.52 10.42
 -8 10 11 11.65 7.02
 -8 12 -4 56.03 14.2
 -8 12 -3 4 5.24
 -8 -12 -2 34.18 8.66
 -8 12 -2 60.83 13.34
 -8 -12 -1 -0.92 3.23
 -8 12 -1 -4.46 4.9
 -8 -12 0 24.48 7.46
 -8 12 0 29.1 10.19
 -8 -12 1 1.06 4.14
 -8 12 1 -1.47 4.15
 -8 -12 2 107.34 16.37
 -8 12 2 113.38 19.14
 -8 -12 3 0.97 2.77
 -8 12 3 4.53 5.75
 -8 -12 4 56.09 12.27
 -8 12 4 74.27 15.74
 -8 -12 5 8.04 4.59
 -8 12 5 3.63 5.48
 -8 -12 6 10.92 6.67
 -8 12 6 10.29 5.9
 -8 -12 7 7.79 6.58
 -8 12 7 -1.26 4.81
 -8 -12 8 4.77 5.35
 -8 12 8 6.09 5.54
 -8 -14 -1 3.09 5.18
 -8 -14 0 23.56 8.13
 -8 -14 1 2.43 3.12
 -8 -14 2 4.6 5.18
 -8 -14 3 22.1 8.35
 -8 -14 4 11.75 6.2
 -8 -16 0 13.93 8.31
 -7 1 -11 6.65 4.45
 -7 -1 -11 7.57 4.98
 -7 1 -10 12.84 5.86
 -7 -1 -10 18.32 5.8
 -7 1 -9 121.64 15.61
 -7 -1 -9 129.33 16.09
 -7 1 -8 14.24 5.42
 -7 -1 -8 2.89 2.29
 -7 1 -7 60.9 10.49
 -7 -1 -7 57.79 10.19
 -7 1 -6 8.74 3.82
 -7 -1 -6 9.94 4.52
 -7 -1 -5 64.03 6.9
 -7 1 -5 62.08 9.66
 -7 -1 -5 75.52 10.34
 -7 1 -4 -0.95 2.18
 -7 -1 -4 1.09 1.18
 -7 -1 -4 1.1 2.57
 -7 -1 -3 16.68 3.63
 -7 1 -3 21.71 5.4
 -7 1 -3 18.71 4.11
 -7 -1 -3 19.2 4.99
 -7 1 -2 4.2 2.07
 -7 -1 -2 7.61 3.41
 -7 -1 -2 11.85 3.29
 -7 1 -2 1.24 2.03
 -7 1 -1 219.3 14.08
 -7 -1 -1 198.96 11.95
 -7 -1 -1 225.95 14.82
 -7 1 -1 210.45 15.18
 -7 1 0 10.05 2.9
 -7 1 0 7.89 3.24
 -7 -1 0 17.32 3.97
 -7 1 0 16.73 4.6
 -7 1 1 131.54 13.39
 -7 -1 1 137.8 10.69
 -7 1 1 159.64 12.33
 -7 1 2 4.65 2.22
 -7 -1 2 5.14 3.24
 -7 -1 3 134.15 11.56
 -7 1 3 146.66 13.59
 -7 -1 4 29.25 5.5
 -7 1 4 28.29 6.07
 -7 -1 5 61.27 7.81
 -7 1 5 69.68 9.36
 -7 -1 6 2.52 2.24
 -7 1 6 3 2.56
 -7 -1 7 71.39 8.56
 -7 1 7 73.15 10.06
 -7 -1 8 78.92 12.89
 -7 -1 8 78.9 9.31
 -7 1 8 76.49 10.7
 -7 -1 9 121.66 16.52
 -7 1 9 133.19 17.08
 -7 1 9 120.35 13.39
 -7 -1 9 107.4 11.36
 -7 -1 10 4.68 3.62
 -7 1 10 4.46 5.24
 -7 -1 10 -2.05 2.47
 -7 1 10 5.93 4
 -7 -1 11 33.48 9.16
 -7 1 11 26.85 9.03
 -7 1 11 21.73 6.9
 -7 -1 11 34.61 7.07
 -7 -1 12 1.17 3.84
 -7 1 12 5.3 4.86
 -7 -1 12 2.52 2.63
 -7 1 12 1.67 2.29
 -7 1 13 57.81 12.87
 -7 -1 13 46.59 12.32
 -7 1 13 59.96 11.17
 -7 -1 13 51.3 9.53
 -7 -1 14 -1.57 4.72
 -7 1 14 9.09 5.91
 -7 1 14 9.15 4.72
 -7 1 15 10.01 5.59
 -7 1 15 24.53 7.9
 -7 -3 -11 12.68 5.91
 -7 3 -11 12.15 6.63
 -7 3 -10 3.59 3.72
 -7 -3 -10 11.65 5.91
 -7 -3 -9 13.19 5.71
 -7 3 -9 21.73 6.98
 -7 3 -8 -1.88 3.36
 -7 -3 -8 0.83 2.86
 -7 3 -7 74.09 11.74
 -7 -3 -7 55.85 10.03
 -7 3 -6 -0.58 3.05
 -7 -3 -6 1.48 2.19
 -7 3 -5 36.76 7.83
 -7 -3 -5 45.95 8.14
 -7 -3 -4 1.33 1.15
 -7 -3 -4 1.17 2.32
 -7 3 -4 1.53 1.91
 -7 -3 -3 7.34 3.12
 -7 3 -3 2.54 2.73
 -7 3 -2 22 5.81
 -7 -3 -2 10.07 3.7
 -7 3 -1 153.23 16.05
 -7 3 -1 151.71 13.8
 -7 -3 -1 140.04 11.46
 -7 3 0 30.08 6.09
 -7 -3 0 37.4 5.59
 -7 3 0 20.49 5.97
 -7 3 1 204.53 17.74
 -7 -3 1 212.86 12.04
 -7 -3 2 8.53 2.76
 -7 3 2 7.67 3.98
 -7 3 3 124.27 13.73
 -7 -3 4 -0.68 2.17
 -7 3 4 0.72 1.84
 -7 -3 5 91.97 12.31
 -7 -3 5 85.07 7.4
 -7 3 5 93.16 11.89
 -7 -3 6 4.01 3.07
 -7 3 6 0.74 1.63
 -7 -3 6 5.21 1.85
 -7 -3 7 298.57 23.16
 -7 3 7 319.8 23.06
 -7 -3 7 263.35 13.45
 -7 -3 8 2.66 3.95
 -7 -3 8 2.36 1.98
 -7 -3 8 1.72 1.53
 -7 3 8 0.97 2.57
 -7 -3 9 258.02 22.44
 -7 3 9 214.58 21.02
 -7 -3 9 258.43 24.46
 -7 3 9 226.08 20.6
 -7 -3 9 252.02 14.44
 -7 -3 10 -3.91 4.71
 -7 3 10 7.31 5.01
 -7 -3 10 -1.66 3.34
 -7 3 10 1.99 1.93
 -7 -3 10 -0.09 1.33
 -7 -3 11 43.78 11.35
 -7 3 11 44.26 10.65
 -7 -3 11 34.87 6.18
 -7 3 11 47.09 10.2
 -7 -3 12 7.99 5.31
 -7 3 12 2.61 3.16
 -7 3 12 0.24 3.31
 -7 3 13 48.05 12.08
 -7 -3 13 39.15 10.88
 -7 3 13 56.29 11.85
 -7 -3 14 5.62 7.03
 -7 3 14 10.7 8.08
 -7 3 14 -0.62 3.26
 -7 3 15 44.31 12.13
 -7 -3 15 33.2 11.24
 -7 3 15 27.95 9.32
 -7 3 16 9.3 5.83
 -7 3 16 3.15 4.17
 -7 3 17 11.55 6.79
 -7 -5 -11 6.02 4.58
 -7 -5 -10 -2.15 4.35
 -7 5 -10 9.98 5.46
 -7 -5 -9 9.46 5.84
 -7 5 -9 9.64 5.03
 -7 -5 -8 16.97 6.3
 -7 5 -8 17.49 6.46
 -7 -5 -7 50 9.8
 -7 5 -7 31.71 7.85
 -7 5 -6 -2.92 3.48
 -7 -5 -6 2.36 2.87
 -7 -5 -5 103.5 12.24
 -7 5 -5 126.19 14.39
 -7 -5 -4 35.62 7.01
 -7 5 -4 34.5 7.51
 -7 -5 -3 121.57 12.02
 -7 5 -3 101.8 12.42
 -7 5 -2 41.82 8.02
 -7 5 -2 31.69 8.13
 -7 -5 -1 133.77 12.87
 -7 -5 -1 171.77 12.17
 -7 5 -1 154.54 14.47
 -7 5 -1 154.18 16.9
 -7 -5 0 20.1 5.53
 -7 -5 0 22.14 4.17
 -7 5 0 21.34 6.54
 -7 -5 1 93.06 11.52
 -7 5 1 115.08 14.61
 -7 -5 1 106.25 8.11
 -7 -5 2 -3.13 3.39
 -7 -5 2 0.5 0.93
 -7 5 2 3.12 3
 -7 -5 3 60.05 9.89
 -7 5 3 47.05 9.17
 -7 -5 4 2.05 3.36
 -7 5 4 -1.69 3.65
 -7 -5 5 72.45 11.35
 -7 5 5 88.31 12.91
 -7 -5 6 0.96 3.34
 -7 5 6 8.92 5
 -7 -5 7 63.6 11.26
 -7 5 7 64.59 11.29
 -7 -5 8 19.98 7.15
 -7 -5 8 21.8 7.13
 -7 5 8 17.11 6.36
 -7 -5 9 66.61 13.1
 -7 -5 9 68.2 12.24
 -7 5 9 59.7 11.62
 -7 -5 10 5.62 5.06
 -7 -5 10 14.14 6.58
 -7 5 10 15.15 6.79
 -7 -5 11 20.61 8.18
 -7 5 11 37.1 9.35
 -7 -5 11 36 9.55
 -7 5 11 25.92 8.34
 -7 5 12 12.05 5.82
 -7 -5 12 18.33 8.14
 -7 -5 12 18.04 6.62
 -7 5 12 20.51 7.25
 -7 -5 13 15.87 8.38
 -7 5 13 17.84 7.5
 -7 -5 13 15.58 7.25
 -7 5 13 21.66 8.03
 -7 -5 14 3.25 4.97
 -7 5 14 4.91 5.37
 -7 -5 14 6.76 5.81
 -7 5 14 -0.76 2.54
 -7 5 15 22.81 8.45
 -7 -5 15 19.91 7.91
 -7 5 15 10.01 5.7
 -7 5 16 3.86 2.91
 -7 5 16 7.86 6.44
 -7 -7 -10 22.4 8.04
 -7 7 -10 16.05 6.84
 -7 -7 -9 4.16 3.17
 -7 7 -9 10.12 5.53
 -7 -7 -8 12.25 5.32
 -7 7 -8 3.09 3.64
 -7 -7 -7 28.2 7.87
 -7 7 -7 19.69 6.46
 -7 7 -6 5.61 4.42
 -7 -7 -6 7.32 4.16
 -7 7 -5 45.38 9.29
 -7 -7 -5 43.87 8.24
 -7 7 -4 13.52 5.4
 -7 -7 -4 3.1 2.91
 -7 -7 -3 76.79 9.72
 -7 -7 -3 102.68 11.07
 -7 7 -3 91.95 12.46
 -7 7 -3 88.94 13.98
 -7 -7 -2 31.01 6.72
 -7 7 -2 28.52 7.15
 -7 -7 -2 34.33 6.14
 -7 7 -2 37.65 9.24
 -7 -7 -1 93.44 11.48
 -7 -7 -1 88.32 8.78
 -7 7 -1 75.93 12.58
 -7 -7 0 2.41 3.29
 -7 -7 0 2.7 1.84
 -7 7 0 0.9 2.42
 -7 -7 1 129.77 14.4
 -7 7 1 145.14 17.39
 -7 -7 1 138.17 8.45
 -7 -7 2 23.28 6.77
 -7 -7 2 16.93 2.43
 -7 7 2 34.58 8.46
 -7 -7 3 56.29 10.14
 -7 7 3 68.56 11.85
 -7 -7 4 0.52 2.49
 -7 7 4 -0.73 2.85
 -7 -7 5 120.58 15.25
 -7 7 5 147.27 18.16
 -7 -7 6 3.89 3.04
 -7 7 6 1.16 2.63
 -7 -7 7 92.44 14.01
 -7 7 7 90.6 14.37
 -7 -7 8 3.57 3.97
 -7 -7 8 2.48 3.06
 -7 7 8 8.91 5.01
 -7 -7 9 73.86 13.46
 -7 -7 9 68.34 12.8
 -7 7 9 63.35 12.57
 -7 -7 10 19.6 7.4
 -7 -7 10 22.23 7.68
 -7 7 10 2.2 2.5
 -7 -7 11 16.96 6.59
 -7 -7 11 18.03 7.33
 -7 7 11 25.34 8.98
 -7 7 12 10.68 4.67
 -7 -7 12 13.51 8.05
 -7 -7 12 18.07 7.59
 -7 7 12 2.16 4.16
 -7 -7 13 5.02 5.12
 -7 7 13 11.49 5.3
 -7 -7 13 10.03 6.16
 -7 7 13 8.49 6.6
 -7 -7 14 1.26 5.2
 -7 7 14 2.66 4.17
 -7 -7 14 11.83 6.46
 -7 7 14 9.39 6.33
 -7 7 15 16.26 7.61
 -7 -7 15 11.82 6.25
 -7 7 15 25.17 10.06
 -7 -9 -10 -1.38 3.38
 -7 -9 -9 50.43 11.68
 -7 9 -9 36.75 9.52
 -7 9 -8 -2.45 2.61
 -7 -9 -8 8.11 5.19
 -7 9 -7 27.79 7.82
 -7 -9 -7 28.5 7.45
 -7 -9 -6 -0.92 2.69
 -7 9 -6 6 4.88
 -7 -9 -5 74.45 11.18
 -7 9 -5 88.61 13.21
 -7 -9 -4 14.14 4.93
 -7 9 -4 14.88 5.88
 -7 -9 -4 21.64 6.04
 -7 9 -4 21.5 7.79
 -7 -9 -3 184.1 16.06
 -7 9 -3 206.66 22.35
 -7 -9 -3 182.84 15.41
 -7 -9 -2 2.87 2.81
 -7 -9 -2 4.38 2.84
 -7 9 -2 -1.82 3.06
 -7 -9 -1 66.79 10.31
 -7 -9 -1 63.32 7.42
 -7 9 -1 60.91 11.99
 -7 -9 0 23.6 6.83
 -7 -9 0 15.17 3.34
 -7 9 0 23.03 8.36
 -7 -9 1 37.96 8.24
 -7 -9 1 45.71 4.7
 -7 9 1 44.37 10.16
 -7 -9 2 2.02 2.76
 -7 9 2 2.03 3.71
 -7 -9 3 54.77 10.69
 -7 9 3 53.17 11.34
 -7 -9 4 6.24 4.97
 -7 9 4 2.36 3.94
 -7 -9 5 34.26 8.7
 -7 9 5 54.25 11.64
 -7 -9 6 -1.15 1.93
 -7 9 6 1.3 2.61
 -7 -9 7 -1.81 4.03
 -7 9 7 -0.59 3.67
 -7 -9 8 9.35 5.21
 -7 9 8 29.91 9.6
 -7 -9 9 25.77 8.93
 -7 -9 9 30.9 9.17
 -7 9 9 20.14 8
 -7 -9 10 2.74 4.98
 -7 -9 10 6.68 4.41
 -7 9 10 3.63 4.93
 -7 -9 11 20.22 7.79
 -7 -9 11 33.07 9.74
 -7 9 11 34.61 11.05
 -7 -9 12 3.84 4.87
 -7 -9 12 -0.05 2.74
 -7 9 12 -6.04 5.53
 -7 -9 13 28.34 9.5
 -7 -9 13 20.2 8.6
 -7 9 13 14.91 7.26
 -7 -11 -9 25.88 8.82
 -7 -11 -8 -2.16 3.91
 -7 -11 -7 40.51 9.65
 -7 11 -7 20.49 7.66
 -7 -11 -6 4.4 4.91
 -7 11 -6 5.29 4.26
 -7 -11 -5 5.96 3.7
 -7 -11 -4 94.65 12.2
 -7 11 -4 70.34 14.19
 -7 -11 -3 5.34 3.43
 -7 -11 -3 2.64 2.73
 -7 11 -3 -0.03 2.58
 -7 -11 -2 21.96 6.29
 -7 11 -2 26.25 8.81
 -7 -11 -1 47.14 10.5
 -7 11 -1 25.91 8.9
 -7 -11 0 10.96 5.1
 -7 11 0 19.91 7.49
 -7 -11 1 72.06 12.15
 -7 11 1 45.96 11.93
 -7 -11 2 12.42 5.73
 -7 11 2 11.06 6.44
 -7 -11 3 58.87 11.4
 -7 11 3 44.3 11.21
 -7 -11 4 2.91 3.95
 -7 11 4 11.2 6.2
 -7 -11 5 50.53 10.99
 -7 11 5 50.93 12.14
 -7 -11 6 3.75 4.47
 -7 11 6 -1.12 3.32
 -7 -11 7 117.04 17.56
 -7 11 7 103.76 17.7
 -7 -11 8 68.19 13.75
 -7 11 8 81.29 15.93
 -7 -11 9 90.11 16.29
 -7 11 9 69.74 14.76
 -7 -11 10 3.04 4.31
 -7 -11 10 3.73 4.74
 -7 11 10 0.63 5.36
 -7 -11 11 22.95 8.95
 -7 -11 11 13.24 7.16
 -7 11 11 18.95 8.71
 -7 -11 12 3.41 4.86
 -7 13 -5 11.82 6.58
 -7 13 -4 10.58 6.84
 -7 13 -3 -2.26 3.83
 -7 -13 -2 1.76 2.08
 -7 13 -2 1.55 2.67
 -7 -13 -1 37.83 9.03
 -7 13 -1 28.14 9.76
 -7 -13 0 1.74 3.2
 -7 13 0 -2.2 4.49
 -7 -13 1 67.58 12.51
 -7 13 1 83.12 16.03
 -7 -13 2 19.33 6.59
 -7 13 2 22.87 9.62
 -7 -13 3 56.41 12.02
 -7 13 3 75.23 15.28
 -7 -13 4 3.7 5.53
 -7 13 4 -3.54 5.22
 -7 -13 5 20.83 8.09
 -7 13 5 35.13 10.44
 -7 -13 6 -2.72 4.04
 -7 13 6 9.69 7.61
 -7 -13 7 41.5 12.2
 -7 13 7 36.35 11.82
 -7 -13 8 -5.56 5.56
 -7 13 8 2.84 3.9
 -7 -15 -1 11.13 5.38
 -7 -15 0 7.8 6.29
 -7 15 0 7.09 6.27
 -7 -15 1 5.93 3.69
 -7 15 1 -3.32 5.85
 -7 -15 2 2.8 5.1
 -7 15 2 3.3 4.96
 -7 -15 3 -0.4 5.06
 -7 -15 4 5.85 5.15
 -6 0 -12 24.81 8.46
 -6 0 -11 9.04 4.79
 -6 0 -10 45.3 9.59
 -6 0 -9 3.89 4.04
 -6 0 -8 -1.31 2.78
 -6 0 -7 0.82 3.03
 -6 0 -6 64.18 9.41
 -6 0 -5 -0.38 1.7
 -6 0 -4 27.38 5.89
 -6 0 -3 0.79 1.65
 -6 0 -3 -0.85 1.87
 -6 0 -2 177.64 13.03
 -6 0 -2 167.72 10.58
 -6 0 -1 1.23 2.2
 -6 0 -1 -1.56 1.39
 -6 0 0 493.32 18.5
 -6 0 0 471.15 19.51
 -6 0 1 5.02 2.89
 -6 0 1 -0.63 1.88
 -6 0 2 5403.17 73
 -6 0 3 1.06 1.98
 -6 0 4 290.06 16.67
 -6 0 5 -0.19 1.26
 -6 0 6 62.28 8.08
 -6 0 7 0.57 2.7
 -6 0 7 0.41 1.69
 -6 0 8 53.68 9.9
 -6 0 8 42.24 7.01
 -6 0 9 3.64 3.75
 -6 0 9 0.97 1.51
 -6 0 10 71.54 12.23
 -6 0 10 77.05 10.32
 -6 0 11 0.24 2.4
 -6 0 11 3.73 3.35
 -6 0 12 -1.22 4.77
 -6 0 12 10.25 4.46
 -6 0 13 2.59 3.53
 -6 0 13 -4.58 3.66
 -6 0 14 8.8 6.45
 -6 0 14 5.71 3.77
 -6 0 15 5.93 5.28
 -6 0 15 5.87 4.45
 -6 0 16 21.65 8.72
 -6 0 16 25.3 8.52
 -6 2 -12 63.94 12.24
 -6 -2 -12 73.44 13.83
 -6 -2 -11 -4.43 4.54
 -6 2 -11 8.83 6.88
 -6 -2 -10 40.46 9.03
 -6 2 -10 47.38 9.94
 -6 -2 -9 54.85 10.12
 -6 2 -9 65.3 11.28
 -6 -2 -8 76.7 11.74
 -6 2 -8 62.15 10.46
 -6 -2 -7 1.17 2.56
 -6 2 -7 4.45 3.98
 -6 2 -6 180.1 16.11
 -6 -2 -6 173.34 15.67
 -6 2 -5 3.92 3.75
 -6 -2 -5 4.24 3.04
 -6 -2 -4 125.75 12.04
 -6 -2 -4 152.47 8.75
 -6 2 -4 135.85 12.9
 -6 -2 -3 13.26 2.69
 -6 2 -3 11.48 3.72
 -6 -2 -3 22.49 4.89
 -6 -2 -2 180.94 9.2
 -6 2 -2 197.06 12.88
 -6 -2 -2 200.33 13.5
 -6 2 -2 192.4 14.21
 -6 -2 -1 2.75 1.73
 -6 2 -1 4.8 2.31
 -6 2 -1 8.73 3.2
 -6 2 -1 2.07 2.39
 -6 2 0 3.39 1.75
 -6 -2 0 7.42 2.53
 -6 2 0 2.55 1.52
 -6 2 0 7.44 3.77
 -6 2 1 385.58 21.9
 -6 2 1 421.82 19.16
 -6 -2 1 373.12 15
 -6 -2 2 195.23 10.42
 -6 2 2 211.05 16.08
 -6 -2 3 107.01 8.55
 -6 2 3 106.12 11.3
 -6 -2 4 44.06 7.48
 -6 -2 4 45.8 5.59
 -6 2 4 52.61 8.12
 -6 -2 5 0.27 2.14
 -6 -2 5 4.33 1.89
 -6 2 5 0.51 1.79
 -6 -2 6 135.31 14.19
 -6 -2 6 155.46 16.06
 -6 -2 6 152.55 10.48
 -6 2 6 121.62 12.56
 -6 2 7 6.6 3.94
 -6 -2 7 4.75 2.72
 -6 -2 7 0.91 1.72
 -6 -2 7 3.75 2.02
 -6 2 7 2.06 2.34
 -6 -2 8 84.6 11.72
 -6 2 8 90.57 12.6
 -6 -2 8 108.43 14.15
 -6 -2 8 79.29 8.33
 -6 2 8 89.56 11.46
 -6 2 9 2.41 2.24
 -6 -2 9 2.43 2.81
 -6 -2 9 -1.85 2.86
 -6 -2 9 2.57 2.38
 -6 2 9 2.33 2.47
 -6 2 10 183.2 19.04
 -6 -2 10 164.03 19
 -6 -2 10 184.18 14.46
 -6 2 10 180.76 17.44
 -6 -2 11 8.76 5.62
 -6 2 11 1.53 2.84
 -6 2 11 2.93 3.03
 -6 -2 11 4.05 2.67
 -6 2 12 106.93 15.75
 -6 -2 12 102.54 16.36
 -6 2 12 120.53 15.46
 -6 -2 12 106.14 12.43
 -6 2 13 49.94 11.98
 -6 -2 13 42.75 11.25
 -6 -2 13 43.86 8.9
 -6 2 13 53.83 10.94
 -6 -2 14 31.08 10.29
 -6 2 14 20.45 7.37
 -6 -2 14 21.26 6.56
 -6 2 14 39.74 9.48
 -6 -2 15 1.12 4.47
 -6 2 15 -3.24 3.77
 -6 2 15 2.25 2.55
 -6 2 16 31.38 10.2
 -6 2 16 47.67 11.78
 -6 2 17 -3.28 4.2
 -6 4 -12 16.52 6.42
 -6 -4 -12 16.54 7.3
 -6 -4 -11 12.74 6.16
 -6 4 -11 5.4 4.35
 -6 4 -10 52.42 10.75
 -6 -4 -10 60.16 11.35
 -6 4 -9 0.23 2.92
 -6 -4 -9 -0.5 2.54
 -6 -4 -8 39.33 8.62
 -6 4 -8 19.95 5.91
 -6 4 -7 6.16 4.02
 -6 -4 -7 5.19 4.26
 -6 -4 -6 182.05 16.3
 -6 -4 -6 183.7 7.54
 -6 4 -6 147.41 15.21
 -6 4 -5 1.76 2.51
 -6 -4 -5 5.81 3.27
 -6 -4 -5 6.47 1.3
 -6 4 -4 104.42 11.71
 -6 -4 -4 117.41 11.58
 -6 4 -3 1.83 2.29
 -6 -4 -3 4.4 2.62
 -6 4 -2 63.19 8.69
 -6 -4 -2 66.84 7.77
 -6 4 -2 67.65 10.49
 -6 -4 -1 3.9 2.49
 -6 -4 -1 0.76 1.53
 -6 4 -1 2.08 2.68
 -6 4 -1 -0.47 1.74
 -6 -4 0 182.75 14.29
 -6 4 0 186.8 16.72
 -6 4 0 199.45 14.67
 -6 -4 0 195.02 11.21
 -6 -4 1 31.68 6.2
 -6 -4 1 32.54 4.24
 -6 4 1 43.7 8.22
 -6 -4 2 117.62 12.18
 -6 -4 2 109.02 6.8
 -6 4 2 125.1 13.52
 -6 -4 3 0.91 3
 -6 4 3 9.95 4.03
 -6 -4 4 194.65 16.44
 -6 4 4 204.05 17.4
 -6 -4 5 0.78 1.51
 -6 4 5 5.2 3.95
 -6 -4 6 86.84 11.78
 -6 -4 6 87.62 12.48
 -6 -4 6 83.34 4.94
 -6 4 6 78.16 11.32
 -6 -4 7 18.08 6.35
 -6 -4 7 23.22 6.51
 -6 -4 7 28.88 3.37
 -6 4 7 21.53 5.77
 -6 -4 8 63.4 10.79
 -6 -4 8 78.61 12.48
 -6 4 8 67.24 10.7
 -6 -4 8 63.04 5.61
 -6 4 8 64.46 10.82
 -6 4 9 7.2 3.95
 -6 -4 9 5.24 4.41
 -6 -4 9 6.02 4.47
 -6 4 9 17.01 5.73
 -6 -4 9 12.14 2.94
 -6 -4 10 160.37 17.78
 -6 -4 10 189.98 20.74
 -6 4 10 150.2 16.92
 -6 4 10 130.07 15.86
 -6 -4 10 135.02 10.32
 -6 4 11 -3.73 3.48
 -6 -4 11 7.45 5.05
 -6 -4 11 9.25 5.62
 -6 -4 11 8.22 3.46
 -6 4 11 2.74 3.19
 -6 -4 12 70.69 14.23
 -6 4 12 60.14 12.36
 -6 -4 12 64.97 12.19
 -6 4 12 88.92 13.99
 -6 4 13 4.1 4.24
 -6 -4 13 -3.4 4.7
 -6 -4 13 -2.96 2.5
 -6 4 13 -2.25 3.25
 -6 -4 14 19.2 8.61
 -6 4 14 10.94 6.39
 -6 -4 14 19.89 7.44
 -6 4 14 23.13 8.17
 -6 -4 15 7.6 5.46
 -6 4 15 2.94 3.97
 -6 4 15 2.67 5.21
 -6 4 16 19.23 8.9
 -6 4 16 19.59 8.28
 -6 4 17 2.31 5.07
 -6 -6 -12 40.65 10.91
 -6 6 -11 7.32 5.27
 -6 -6 -11 7.14 5.12
 -6 -6 -10 36.55 9.55
 -6 6 -10 35.4 8.97
 -6 6 -9 4.2 4.09
 -6 -6 -9 2.32 3.14
 -6 -6 -8 10.9 5.52
 -6 6 -8 12.47 4.94
 -6 -6 -7 2.93 3.1
 -6 6 -7 -1.66 2.57
 -6 6 -6 72.63 10.98
 -6 -6 -6 82.67 11.46
 -6 -6 -5 3.49 3.34
 -6 6 -5 3.32 3.71
 -6 6 -4 161.15 15.33
 -6 -6 -4 169.35 14.55
 -6 -6 -3 5.4 2.52
 -6 6 -3 3.38 3.33
 -6 -6 -3 6.04 3.06
 -6 6 -3 7.63 4.56
 -6 -6 -2 168.14 13.34
 -6 -6 -2 191.66 13.27
 -6 6 -2 152.61 16.44
 -6 6 -2 194.1 15.84
 -6 -6 -1 1.58 1.41
 -6 -6 -1 2.54 2.19
 -6 6 -1 -0.87 2.03
 -6 -6 0 92.87 10.64
 -6 -6 0 92.61 7.62
 -6 6 0 90.7 12.4
 -6 -6 1 3.8 2.61
 -6 -6 1 5.01 1.63
 -6 6 1 8.95 4.55
 -6 -6 2 8.95 4.11
 -6 -6 2 10.88 1.91
 -6 6 2 11.14 4.17
 -6 -6 3 10.01 4.63
 -6 6 3 8.81 4.61
 -6 -6 4 190.68 17.18
 -6 6 4 185.44 18.09
 -6 -6 5 1.49 2.24
 -6 6 5 4.78 1.86
 -6 -6 6 218.3 19.14
 -6 6 6 189.89 18.8
 -6 -6 7 -2.63 3.13
 -6 -6 7 2.13 3.17
 -6 6 7 6.41 4.22
 -6 -6 8 115.3 14.81
 -6 -6 8 122.98 15.87
 -6 6 8 145.72 16.89
 -6 6 9 16.37 6.13
 -6 -6 9 7.68 4.79
 -6 -6 9 6.05 3.61
 -6 6 9 19.2 7.37
 -6 6 10 32.61 7.86
 -6 -6 10 26.81 8.32
 -6 -6 10 28.61 8.04
 -6 6 10 32.66 8.33
 -6 6 11 5.62 4.01
 -6 -6 11 4.97 4.62
 -6 -6 11 8.21 5.02
 -6 6 11 4.23 4.19
 -6 -6 12 45.82 11.48
 -6 6 12 54.21 10.99
 -6 -6 12 48.95 11.27
 -6 6 12 56.55 11.92
 -6 6 13 3.49 4.36
 -6 -6 13 -0.84 4.34
 -6 -6 13 -0.23 2.49
 -6 6 13 3.89 4.83
 -6 -6 14 17.03 8.91
 -6 6 14 19.71 7.36
 -6 -6 14 23.63 8.65
 -6 6 14 19.35 7.53
 -6 6 15 2.99 4.44
 -6 -6 15 7.28 5.67
 -6 6 15 1 4.3
 -6 6 16 41.6 11.92
 -6 -6 16 25.85 8.46
 -6 6 16 51.14 13.58
 -6 -6 17 6.48 6.26
 -6 -8 -11 4.29 4
 -6 8 -11 -3.36 3.75
 -6 -8 -10 -0.92 3.64
 -6 8 -10 10.88 6.06
 -6 -8 -9 13.33 5.67
 -6 8 -9 19.03 6.94
 -6 -8 -8 79.57 13.14
 -6 8 -8 65.68 11.19
 -6 -8 -7 16.72 6.56
 -6 8 -7 8.13 4.92
 -6 -8 -6 58.62 10.39
 -6 8 -6 53.9 9.83
 -6 -8 -5 3.01 1.92
 -6 8 -5 0.22 2.2
 -6 -8 -5 3.52 3.81
 -6 -8 -4 80.56 9.19
 -6 -8 -4 72.33 9.99
 -6 8 -4 64.61 10.24
 -6 8 -4 74.49 12.74
 -6 -8 -3 6.9 3.05
 -6 8 -3 17.15 5.65
 -6 -8 -3 13.47 4.19
 -6 8 -3 4.96 3.74
 -6 -8 -2 85.94 10.22
 -6 -8 -2 76.78 8.85
 -6 8 -2 76.13 12.58
 -6 -8 -1 15.21 4.56
 -6 -8 -1 17.41 3.81
 -6 8 -1 17.13 6.39
 -6 -8 0 65.07 9.42
 -6 -8 0 50.34 6.78
 -6 -8 0 58.79 6.05
 -6 8 0 66.15 11.53
 -6 -8 1 64.28 9.54
 -6 -8 1 59.91 5.05
 -6 8 1 59.45 10.72
 -6 -8 2 232.54 18.86
 -6 8 2 229.28 21.14
 -6 -8 2 223.46 6.52
 -6 -8 3 31.84 7.59
 -6 8 3 41.1 9.26
 -6 -8 4 71.83 11.17
 -6 8 4 63.47 11.45
 -6 -8 5 3 2.68
 -6 8 5 8.35 3.81
 -6 -8 6 75.84 11.94
 -6 8 6 69.3 12.43
 -6 -8 7 0.51 2.95
 -6 -8 7 6.4 2.79
 -6 8 7 2.87 4.12
 -6 -8 8 155.19 18.19
 -6 -8 8 168.34 18.96
 -6 8 8 127.52 17.44
 -6 -8 9 -0.58 2.1
 -6 8 9 3.68 4.46
 -6 -8 10 59.85 12.53
 -6 -8 10 67.99 12.91
 -6 8 10 69.09 13.65
 -6 8 11 15.1 5.6
 -6 -8 11 16.64 6.93
 -6 -8 11 23.86 7.88
 -6 8 11 18.56 6.72
 -6 -8 12 81.33 15.78
 -6 8 12 53.75 11.11
 -6 -8 12 51.04 11.97
 -6 8 12 53.03 12.55
 -6 -8 13 7.17 4.54
 -6 8 13 5.75 4.21
 -6 -8 13 9.42 5.52
 -6 8 13 11.64 5.79
 -6 -8 14 14.86 8.12
 -6 8 14 9.78 6.03
 -6 -8 14 14.89 7.37
 -6 8 14 4.26 4.74
 -6 -8 15 -1.34 2.91
 -6 10 -10 7.63 5.2
 -6 -10 -10 0.03 4.49
 -6 10 -9 0.19 2.59
 -6 -10 -9 9.51 5.79
 -6 -10 -8 33.11 9.22
 -6 10 -8 36.54 8.64
 -6 -10 -7 0.77 2.91
 -6 10 -7 4.54 3.73
 -6 10 -6 33.11 7.8
 -6 -10 -6 40.82 8.89
 -6 -10 -5 5.21 2.82
 -6 10 -5 6.78 4.72
 -6 -10 -5 4.11 2.8
 -6 -10 -4 65.67 9.25
 -6 -10 -4 56.99 9.69
 -6 10 -4 52.32 11.43
 -6 -10 -3 2.2 3
 -6 -10 -3 -0.31 1.77
 -6 10 -3 2.01 2.76
 -6 -10 -2 53.43 9.04
 -6 -10 -2 66.46 8.75
 -6 10 -2 58.26 11.83
 -6 -10 -1 1.84 2.39
 -6 -10 -1 1.89 2.4
 -6 10 -1 -0.02 3.64
 -6 -10 0 21.65 6.03
 -6 -10 0 29.96 4.66
 -6 10 0 41.59 10.19
 -6 -10 1 -1.18 2.54
 -6 -10 1 1.06 1.34
 -6 10 1 0.8 3.24
 -6 -10 2 136.61 15.47
 -6 10 2 133.58 17.57
 -6 -10 3 3.87 2.89
 -6 10 3 8.34 5.82
 -6 -10 4 53.66 10.46
 -6 10 4 45.39 10.7
 -6 -10 5 4.37 4.17
 -6 10 5 1.46 2.55
 -6 -10 6 62.9 11.64
 -6 10 6 52.58 11.48
 -6 -10 7 19.93 7.36
 -6 10 7 19.89 8.14
 -6 -10 8 86.68 14.28
 -6 -10 8 115.46 16.43
 -6 10 8 86.27 15.4
 -6 -10 9 12.6 5.98
 -6 -10 9 4.78 3.05
 -6 10 9 14.31 6.97
 -6 -10 10 37.02 9.67
 -6 -10 10 45.02 11.01
 -6 10 10 66.88 14.21
 -6 -10 11 3.79 3.75
 -6 -10 11 1.33 4.12
 -6 10 11 14.57 7.28
 -6 -10 12 39.05 11.27
 -6 -10 12 35.02 10.42
 -6 10 12 40.06 11.2
 -6 -10 13 4.77 5.72
 -6 -10 13 5.98 6.42
 -6 10 13 0.21 3.44
 -6 -12 -9 7.46 4.75
 -6 12 -8 19.65 6.89
 -6 -12 -8 13.58 7.08
 -6 -12 -7 -0.73 3.65
 -6 -12 -6 10.95 4.58
 -6 -12 -5 3.62 3.53
 -6 12 -5 6.05 5.27
 -6 -12 -4 6.31 3.51
 -6 -12 -4 8.11 4.34
 -6 -12 -3 0.16 1.99
 -6 -12 -3 3.27 3.56
 -6 12 -3 4.75 4.51
 -6 -12 -2 49.54 9.51
 -6 12 -2 44.86 11.25
 -6 -12 -1 3.61 3.85
 -6 12 -1 1.39 2.73
 -6 -12 0 96.14 13.52
 -6 12 0 106.06 16.53
 -6 -12 1 9.78 5.02
 -6 12 1 7.6 6.58
 -6 -12 2 128.56 16.17
 -6 12 2 138.42 19.06
 -6 -12 3 20.46 6.57
 -6 12 3 24.75 8.52
 -6 -12 4 82.6 13.68
 -6 12 4 77.69 14.47
 -6 -12 5 5.72 5.01
 -6 12 5 7.45 5.54
 -6 -12 6 31.15 9.27
 -6 12 6 32.73 10.25
 -6 -12 7 5.54 4.75
 -6 12 7 5.1 4.56
 -6 -12 8 2.56 4.21
 -6 12 8 1.51 3.28
 -6 -12 9 1.47 2.45
 -6 -12 9 5.69 5.73
 -6 12 9 0.62 3.97
 -6 -12 10 23.54 8.53
 -6 -12 10 29.75 9.8
 -6 12 10 19.93 8.31
 -6 -12 11 -0.56 3.47
 -6 -12 11 -3.28 3.34
 -6 -12 12 41.75 12.03
 -6 14 -5 -2.36 2.68
 -6 14 -4 23.74 9.33
 -6 -14 -3 4.05 3.13
 -6 14 -3 7.85 6.46
 -6 -14 -2 17.59 6.09
 -6 14 -2 13.01 6.34
 -6 -14 -1 11.27 5.53
 -6 14 -1 25.23 10.69
 -6 -14 0 29.95 9.38
 -6 14 0 56.05 13.25
 -6 -14 1 -0.71 2.75
 -6 14 1 0.6 4.2
 -6 -14 2 44.02 10.45
 -6 14 2 52.22 12.5
 -6 -14 3 2.76 4.77
 -6 14 3 11.88 6.78
 -6 -14 4 30.6 9.47
 -6 14 4 28.87 10.41
 -6 -14 5 5.35 4.87
 -6 14 5 2.71 2.94
 -6 -14 6 18.41 7.79
 -6 14 6 27.61 9.9
 -6 -14 7 3.82 3.69
 -6 14 7 6.96 5.99
 -6 -14 8 22.69 8.98
 -6 14 8 34.17 11.15
 -6 -14 11 7.38 6.59
 -6 -16 -2 20.83 7.26
 -6 16 -2 8.41 5.79
 -6 -16 -1 12.14 5.88
 -6 16 -1 -2.09 4.8
 -6 -16 0 22.71 8.02
 -6 16 0 19.85 9.82
 -6 -16 1 16.9 7.15
 -6 16 1 -3.08 4.22
 -6 -16 2 55.39 12.37
 -6 16 2 46.9 13.55
 -6 -16 3 8.43 5.79
 -6 16 3 6.62 6.18
 -5 1 -13 21.62 7.45
 -5 -1 -13 29.8 9.59
 -5 1 -12 -3.59 3.56
 -5 -1 -12 -3.84 4.38
 -5 -1 -11 27.74 7.9
 -5 1 -11 31.42 8.37
 -5 1 -10 5.08 4.07
 -5 -1 -10 9.44 5.17
 -5 1 -9 227.93 19.43
 -5 -1 -9 239.14 20.24
 -5 1 -8 6.88 4
 -5 -1 -8 3.66 2.23
 -5 -1 -7 30.88 6.88
 -5 1 -7 18.45 5.4
 -5 -1 -6 1.46 1.79
 -5 1 -6 0.63 1.78
 -5 1 -5 90.85 10.2
 -5 -1 -5 94.89 10.52
 -5 1 -4 153.32 12.65
 -5 -1 -4 166.89 12.88
 -5 -1 -3 332.18 17.42
 -5 1 -3 321.12 17.45
 -5 1 -2 -0.6 1.07
 -5 -1 -2 0.44 0.74
 -5 1 -1 203.04 12.62
 -5 -1 -1 195.81 9.56
 -5 1 -1 211.08 11.73
 -5 1 -1 213.48 14.93
 -5 -1 -1 203.66 11.81
 -5 -1 0 80.23 6.96
 -5 1 0 84.05 9.1
 -5 1 0 75.17 6.96
 -5 1 0 73.38 7.4
 -5 1 1 57.28 6.3
 -5 -1 1 60.81 6.83
 -5 1 1 63.4 6.52
 -5 -1 1 59.62 5.67
 -5 1 1 54.56 7.2
 -5 1 2 37.52 6.02
 -5 -1 2 38.89 5.18
 -5 1 3 200.08 13.6
 -5 -1 3 213.05 11.99
 -5 -1 4 2.33 1.22
 -5 1 4 -0.08 1.2
 -5 -1 5 435.42 23.84
 -5 1 5 408.26 22.45
 -5 -1 5 396.94 16.53
 -5 1 5 415.1 20.03
 -5 -1 6 28.6 6.83
 -5 1 6 22.49 6.05
 -5 1 6 24.72 5.18
 -5 -1 6 13.71 3.33
 -5 -1 7 50.76 9.02
 -5 1 7 60.94 9.68
 -5 -1 7 59.73 7.27
 -5 1 7 49.47 7.55
 -5 1 8 9.15 4.76
 -5 -1 8 9.13 4.97
 -5 -1 8 2.9 2.16
 -5 1 8 5.07 3.54
 -5 -1 9 115.56 14.29
 -5 1 9 106.14 13.53
 -5 1 9 101.32 11.58
 -5 -1 9 102.06 10.6
 -5 1 10 3.75 3.67
 -5 -1 10 -2.39 3.35
 -5 -1 10 0.85 2.06
 -5 1 10 2.47 2.37
 -5 1 11 115.22 15.54
 -5 -1 11 116.82 16.1
 -5 1 11 124.48 14.32
 -5 -1 11 90.93 11.39
 -5 1 12 29.52 8.93
 -5 -1 12 22.23 7.59
 -5 1 12 25.76 6.99
 -5 -1 12 34.7 7.99
 -5 1 13 361.12 29.74
 -5 -1 13 352.47 30.05
 -5 -1 13 324.07 24.23
 -5 1 13 346.38 26.3
 -5 1 14 8.72 5.57
 -5 -1 14 7.43 5.78
 -5 -1 14 9.69 5.08
 -5 1 14 12.86 5.56
 -5 1 15 -2.31 4.91
 -5 -1 15 8.12 6.05
 -5 1 15 8.71 5.69
 -5 -1 15 8.97 5.46
 -5 -1 16 -1.94 4.55
 -5 1 16 -3.7 4.2
 -5 -1 16 5.33 4.5
 -5 1 16 -4.18 3.27
 -5 1 17 5.55 5.18
 -5 1 18 -4.21 3.97
 -5 -3 -13 17.5 7.8
 -5 3 -13 29.71 8.73
 -5 -3 -12 1.54 3.52
 -5 3 -12 6.77 4.25
 -5 -3 -11 58.38 11.53
 -5 3 -11 47.76 9.85
 -5 -3 -10 3.02 3
 -5 3 -10 9.69 5.47
 -5 3 -9 82.29 11.78
 -5 -3 -9 108.92 14.2
 -5 3 -8 3 2.92
 -5 -3 -8 10.87 5.16
 -5 -3 -7 31.14 7.2
 -5 3 -7 25.02 6.09
 -5 -3 -6 9.46 4.4
 -5 3 -6 4.24 3.09
 -5 3 -5 515.12 24.55
 -5 -3 -5 512.1 24.55
 -5 3 -4 6.19 3.02
 -5 -3 -4 9.99 3.58
 -5 -3 -4 8.1 1.74
 -5 -3 -3 530.54 11.63
 -5 -3 -3 520.91 21.74
 -5 3 -3 537.41 23.61
 -5 -3 -2 6.28 2.39
 -5 -3 -2 3.48 1.9
 -5 3 -2 1.36 1.23
 -5 3 -2 4.67 2.65
 -5 -3 -1 151.2 11.24
 -5 3 -1 164.2 11.64
 -5 -3 -1 166.22 10.46
 -5 3 -1 157.73 13.74
 -5 3 -1 171.91 12.48
 -5 -3 0 5.19 2.5
 -5 -3 0 7.06 2.16
 -5 3 0 4.67 2.15
 -5 3 0 9.91 3.37
 -5 3 0 5.06 2.72
 -5 -3 1 330.26 17.77
 -5 -3 1 365.85 12.54
 -5 3 1 371.55 17.34
 -5 3 1 372.04 20.55
 -5 -3 2 26.08 5.3
 -5 -3 2 31.52 3.35
 -5 3 2 37.87 5.71
 -5 3 2 40.38 6.65
 -5 -3 3 175.53 13.88
 -5 3 3 170.93 14.04
 -5 -3 4 73.29 9.26
 -5 -3 4 65.92 4.88
 -5 3 4 60.65 8.44
 -5 -3 5 555.25 26.15
 -5 -3 5 514.32 26.61
 -5 -3 5 515.95 14.25
 -5 3 5 485.53 24.32
 -5 3 6 37.17 7.25
 -5 -3 6 30.79 7.1
 -5 -3 6 30.68 6.29
 -5 3 6 32.59 6.73
 -5 -3 6 30.54 3.75
 -5 3 7 1.31 2.47
 -5 -3 7 3.95 3.07
 -5 -3 7 5.98 3.4
 -5 3 7 0.09 1.87
 -5 -3 7 1.7 1.42
 -5 -3 8 4.71 3.43
 -5 3 8 8.33 4.12
 -5 -3 8 2.28 2.49
 -5 -3 8 1.95 1.02
 -5 3 8 1.21 2.47
 -5 -3 9 95.29 12.64
 -5 3 9 129.3 14.76
 -5 -3 9 131.95 15.94
 -5 3 9 111.03 13.21
 -5 -3 9 103.89 9.38
 -5 -3 10 3.19 4.42
 -5 3 10 3.13 3.13
 -5 -3 10 0.84 2.58
 -5 3 10 0.09 2.65
 -5 -3 10 2.79 2.22
 -5 3 11 112.65 14.85
 -5 -3 11 95.87 15.08
 -5 -3 11 100.19 13.24
 -5 3 11 119.12 14.96
 -5 -3 11 116.47 11.88
 -5 3 12 8.58 5.94
 -5 -3 12 22.35 7.82
 -5 -3 12 11.43 4.83
 -5 -3 12 9.26 3.73
 -5 3 12 17.02 7.12
 -5 -3 13 51.39 11.76
 -5 3 13 43.38 11.32
 -5 -3 13 39.02 8.73
 -5 3 13 40.61 9.69
 -5 -3 13 45.37 8.65
 -5 3 14 -1.81 4.67
 -5 -3 14 -0.26 5.48
 -5 -3 14 0.58 2.44
 -5 3 14 -0.72 2.3
 -5 -3 15 31.87 10.34
 -5 3 15 40.2 11.11
 -5 3 15 48.9 11.34
 -5 -3 16 0.76 4.82
 -5 3 16 1.65 4.63
 -5 3 16 3.36 3.64
 -5 3 17 7.34 4.98
 -5 5 -13 23.56 7.68
 -5 -5 -13 31.34 9.61
 -5 -5 -12 6.25 4.85
 -5 5 -12 4.45 2.9
 -5 5 -11 31.79 8.61
 -5 -5 -11 30.08 8.93
 -5 5 -10 7.4 4.17
 -5 -5 -10 4.77 3.71
 -5 5 -9 33.48 7.6
 -5 -5 -9 28.81 7.66
 -5 5 -8 51.78 9.35
 -5 -5 -8 47.14 9.44
 -5 -5 -7 13.89 5.69
 -5 5 -7 25.12 6.27
 -5 -5 -6 5.44 2.15
 -5 5 -6 7.79 3.69
 -5 5 -5 134.69 13.3
 -5 -5 -5 145.89 13.73
 -5 -5 -4 29.65 4.45
 -5 -5 -4 28.58 5.75
 -5 5 -4 34.63 6.73
 -5 -5 -3 149.72 10.75
 -5 5 -3 171.01 15.99
 -5 5 -3 202.6 15.03
 -5 -5 -3 165.02 12.68
 -5 -5 -2 15.33 3.74
 -5 -5 -2 25.08 5.16
 -5 5 -2 25.56 5.33
 -5 -5 -2 25.35 4.78
 -5 5 -2 25.16 6.13
 -5 -5 -1 157.13 11.91
 -5 5 -1 153.74 12.66
 -5 5 -1 150.29 14.7
 -5 -5 -1 140.21 9.69
 -5 -5 -1 157.96 11.5
 -5 -5 0 19.68 4.58
 -5 -5 0 9.73 2.5
 -5 5 0 8.56 3.53
 -5 -5 1 213.35 14.91
 -5 5 1 215.1 17.36
 -5 -5 1 214.94 8.87
 -5 -5 2 11.21 3.96
 -5 -5 2 12.39 1.72
 -5 5 2 4.91 2.38
 -5 -5 3 80.7 9.82
 -5 5 3 54.33 8.76
 -5 -5 4 74.11 9.78
 -5 5 4 90.61 11.22
 -5 -5 5 788.92 32.58
 -5 -5 5 813.41 34.39
 -5 5 5 769.74 33.97
 -5 -5 6 77.31 11.21
 -5 -5 6 70.92 10.46
 -5 5 6 76.26 11.18
 -5 -5 7 128.56 13.72
 -5 -5 7 137.61 15.32
 -5 5 7 109.28 12.07
 -5 5 7 131.59 14.69
 -5 5 8 12.5 4.88
 -5 -5 8 11.01 5.35
 -5 -5 8 12.2 4.79
 -5 -5 8 11.38 2.03
 -5 5 8 11.43 4.9
 -5 -5 9 132.15 15.21
 -5 -5 9 147.09 17.07
 -5 5 9 133.16 14.5
 -5 -5 9 124.4 8.26
 -5 5 9 120.3 14.93
 -5 5 10 8.41 4.55
 -5 -5 10 17.41 7.15
 -5 -5 10 13.61 5.39
 -5 5 10 16.15 5.87
 -5 -5 10 17.1 3.68
 -5 5 11 52.27 10.06
 -5 -5 11 75.09 13.74
 -5 -5 11 73.98 12.18
 -5 5 11 74.04 12.63
 -5 -5 11 57.92 7.57
 -5 5 12 40.03 9.47
 -5 -5 12 29.39 10.37
 -5 -5 12 29.9 7.93
 -5 -5 12 29.96 6.08
 -5 5 12 27.62 8.6
 -5 -5 13 3.95 4.56
 -5 5 13 15.05 5.98
 -5 -5 13 2.87 3.83
 -5 5 13 7.11 4.53
 -5 5 14 3.85 3.67
 -5 -5 14 4.38 6.2
 -5 -5 14 -3.23 4.12
 -5 5 14 0.49 3.21
 -5 5 15 74.17 14.5
 -5 -5 15 49.99 12.98
 -5 -5 15 45.45 10.81
 -5 5 15 46.09 11.72
 -5 5 16 -2.43 4.59
 -5 -5 16 -1.08 2.67
 -5 5 16 -0.6 3.79
 -5 5 17 4.06 4.48
 -5 7 -12 2.76 3.64
 -5 -7 -12 9.62 6.57
 -5 -7 -11 34.47 10.06
 -5 7 -11 19.49 6.59
 -5 -7 -10 34.16 9.51
 -5 7 -10 18.18 6.4
 -5 7 -9 13.7 5.82
 -5 -7 -9 15.54 6.21
 -5 7 -8 13.75 5.25
 -5 -7 -8 12.99 5.23
 -5 7 -7 45.47 8.62
 -5 -7 -7 53.51 9.99
 -5 -7 -6 16.82 3.11
 -5 7 -6 18.26 5.31
 -5 -7 -6 25.89 6.87
 -5 -7 -5 93.05 8.13
 -5 -7 -5 75.08 10.61
 -5 7 -5 95.29 11.52
 -5 -7 -4 21.56 4.17
 -5 7 -4 26.16 6.24
 -5 -7 -4 24.8 5.79
 -5 7 -4 34.6 8.34
 -5 -7 -3 235.95 14.62
 -5 7 -3 230.54 17.21
 -5 7 -3 211.81 19.1
 -5 -7 -3 221.35 15.5
 -5 -7 -2 7.47 2.94
 -5 -7 -2 11.17 3.41
 -5 7 -2 14.37 4.19
 -5 7 -2 7.89 4.14
 -5 -7 -1 182.58 13.84
 -5 -7 -1 181.19 11.65
 -5 7 -1 186.6 17.37
 -5 -7 -1 183.2 12.75
 -5 -7 0 0.25 1.07
 -5 -7 0 0.33 2
 -5 -7 0 0.13 0.81
 -5 7 0 -2.41 3.1
 -5 -7 1 115.93 11.78
 -5 7 1 138.93 14.91
 -5 -7 1 140.2 7.27
 -5 -7 2 135.07 13.09
 -5 7 2 140.84 15.14
 -5 -7 2 143.21 4.73
 -5 -7 3 215.17 16.9
 -5 7 3 234.78 19.57
 -5 -7 4 3.63 2.63
 -5 -7 4 -1.46 1.65
 -5 7 4 -3.29 2.08
 -5 -7 5 233.94 15.98
 -5 -7 5 207.23 17.52
 -5 -7 5 248 19.95
 -5 7 5 214.37 19.56
 -5 -7 6 11.38 4.38
 -5 -7 6 16.43 4.56
 -5 -7 6 9.42 4.1
 -5 7 6 10.97 4.98
 -5 -7 7 167.52 12.43
 -5 -7 7 164.94 16.48
 -5 -7 7 174.4 17.54
 -5 7 7 148.57 17.1
 -5 -7 8 0.28 1.44
 -5 -7 8 2.26 3.72
 -5 7 8 -1.2 2.22
 -5 -7 8 0.18 2.62
 -5 7 8 0.16 2.61
 -5 -7 9 90.81 13.69
 -5 7 9 75.65 10.59
 -5 -7 9 91.02 13.16
 -5 7 9 80.85 13.34
 -5 -7 10 23.84 7.39
 -5 7 10 22.54 6.19
 -5 -7 10 14.34 5.56
 -5 7 10 20.21 7.53
 -5 7 11 25.39 6.73
 -5 -7 11 19.55 7.6
 -5 7 11 25.65 6.63
 -5 -7 11 22.35 6.71
 -5 7 11 16.83 6.87
 -5 7 12 33.14 8.64
 -5 -7 12 32.03 9.4
 -5 -7 12 24.25 7.95
 -5 7 12 23.76 8.51
 -5 -7 13 24.01 8.88
 -5 7 13 29.77 8.66
 -5 -7 13 6.37 4.57
 -5 7 13 9.41 6.6
 -5 -7 14 16.63 8.49
 -5 7 14 13.86 6.58
 -5 -7 14 9.73 4.77
 -5 7 14 15.54 7.22
 -5 -7 15 31.43 11.17
 -5 7 15 34.67 10.12
 -5 -7 15 28.39 9.28
 -5 7 15 23.56 9.25
 -5 -7 16 4.59 5.64
 -5 7 16 6.1 4.8
 -5 9 -11 26.51 7.37
 -5 -9 -11 6.26 4.57
 -5 -9 -10 -3.25 3.72
 -5 9 -10 5.5 3.94
 -5 -9 -9 46.37 10.4
 -5 9 -9 54.6 10.21
 -5 9 -8 0.72 2.79
 -5 -9 -8 1.74 4.04
 -5 9 -7 44.98 8.78
 -5 -9 -7 51.46 10.63
 -5 -9 -6 14.01 3.63
 -5 -9 -6 7.87 3.47
 -5 9 -6 9.35 4.14
 -5 -9 -5 4.23 2.34
 -5 -9 -5 4.61 3.38
 -5 9 -5 6.96 4.04
 -5 9 -5 7.44 4.86
 -5 -9 -4 25.9 5.24
 -5 -9 -4 25.32 6.32
 -5 9 -4 22.61 6.08
 -5 9 -4 23.68 7.28
 -5 -9 -3 43.03 6.99
 -5 -9 -3 49.71 7.93
 -5 9 -3 47.68 9.56
 -5 -9 -2 4.33 2.7
 -5 -9 -2 0.21 1.37
 -5 9 -2 -0.98 2.59
 -5 -9 -1 100.13 11.04
 -5 -9 -1 98.97 9.37
 -5 -9 -1 87.54 9.14
 -5 9 -1 89.7 13.16
 -5 -9 0 8.67 2.31
 -5 -9 0 8.35 3.36
 -5 -9 0 3.75 1.66
 -5 9 0 5.36 4.52
 -5 -9 1 64.25 9.43
 -5 -9 1 53.92 5.02
 -5 -9 1 55.98 6.1
 -5 9 1 62.52 11
 -5 -9 2 5.52 2.79
 -5 -9 2 10.73 1.45
 -5 9 2 11.64 5.18
 -5 -9 3 109.34 13.01
 -5 9 3 129.84 15.98
 -5 -9 4 21.59 5.92
 -5 9 4 20.26 6.88
 -5 -9 5 142.19 15.79
 -5 9 5 137.79 17.21
 -5 -9 6 -2.92 3.53
 -5 -9 6 -1.2 2.95
 -5 9 6 1.22 2.69
 -5 -9 7 273.68 22.95
 -5 -9 7 271.74 19.43
 -5 -9 7 324.04 24.62
 -5 9 7 272.85 24.33
 -5 -9 8 14.95 5.49
 -5 -9 8 29.65 8.25
 -5 9 8 24.4 8.17
 -5 -9 9 104.45 15.2
 -5 -9 9 86.07 13.66
 -5 9 9 77.13 14.05
 -5 9 10 -3.13 3.01
 -5 -9 10 2.89 6.74
 -5 -9 10 0.1 3.32
 -5 9 10 -2.14 2.1
 -5 9 10 -4.56 4.11
 -5 9 11 57.08 10.18
 -5 -9 11 64.81 13.34
 -5 -9 11 58.23 11.87
 -5 9 11 72.34 12.44
 -5 9 11 66.05 14.09
 -5 9 12 2.79 2.58
 -5 -9 12 18.31 7.52
 -5 9 12 2.49 4.35
 -5 -9 12 15.1 6.79
 -5 9 12 3.35 4.02
 -5 -9 13 76.57 14.75
 -5 -9 13 78.94 14.28
 -5 9 13 74.69 15.29
 -5 -9 14 -1.31 3.76
 -5 -9 14 4.64 5.22
 -5 9 14 1.37 2.92
 -5 -9 15 19.93 7.51
 -5 -11 -11 8.77 5.08
 -5 -11 -10 0.37 2.91
 -5 11 -10 -5.21 3.73
 -5 11 -9 48.21 9.95
 -5 -11 -9 29.54 9.14
 -5 -11 -8 -2.79 3.14
 -5 11 -8 4.46 3.62
 -5 11 -7 45.97 9.27
 -5 -11 -7 36.95 8.89
 -5 11 -6 14.74 5.71
 -5 -11 -6 17.48 6.08
 -5 -11 -5 129.85 12.43
 -5 -11 -5 149.35 16.32
 -5 11 -5 133.45 17.7
 -5 -11 -4 106.35 11.47
 -5 -11 -4 119.24 13.69
 -5 11 -4 119.21 16.57
 -5 -11 -3 149.77 14.21
 -5 11 -3 132.98 17.42
 -5 -11 -3 146.37 14.51
 -5 -11 -2 3.35 3.55
 -5 -11 -2 2.84 3.16
 -5 11 -2 5.47 4.64
 -5 -11 -1 69.09 10.06
 -5 -11 -1 55.97 7.74
 -5 11 -1 51.59 10.78
 -5 -11 0 11.51 4.5
 -5 -11 0 21.35 4.37
 -5 11 0 10.38 5.88
 -5 -11 1 115.45 13.76
 -5 -11 1 109.87 8.1
 -5 11 1 102.7 15.09
 -5 -11 2 14.88 5.16
 -5 -11 2 15.43 2.27
 -5 11 2 17.02 7.26
 -5 -11 3 80.49 12.12
 -5 11 3 89.07 14.3
 -5 -11 4 12.05 5.21
 -5 11 4 11.5 4.4
 -5 -11 5 30.5 7.65
 -5 11 5 39.52 9.9
 -5 -11 6 28.84 7.96
 -5 11 6 52.75 11.68
 -5 -11 7 4.9 4.12
 -5 -11 7 5.21 3.45
 -5 11 7 14.93 7.29
 -5 -11 8 47.17 10.27
 -5 -11 8 47.67 10.42
 -5 11 8 45.23 11.04
 -5 -11 9 34.58 8.98
 -5 -11 9 29.8 8.63
 -5 11 9 30.93 9.7
 -5 -11 10 6.07 6.76
 -5 -11 10 0.7 3.83
 -5 11 10 0.09 2.62
 -5 11 10 5.03 4.53
 -5 -11 11 54.21 12.43
 -5 -11 11 41.27 10.49
 -5 11 11 53.63 11.81
 -5 11 11 45.42 12.47
 -5 -11 12 0.49 2.89
 -5 11 12 0.71 3.63
 -5 -11 12 2.79 3.81
 -5 11 12 -1.29 5.18
 -5 -11 13 22.66 8.17
 -5 -11 13 31.93 10.33
 -5 -13 -10 7.03 4.48
 -5 13 -9 20.56 7.16
 -5 -13 -9 15.45 7.39
 -5 -13 -8 2.57 3.23
 -5 -13 -7 3.32 3.75
 -5 -13 -6 14.92 5.88
 -5 -13 -5 50.47 10.06
 -5 13 -5 50.35 11.58
 -5 -13 -4 0.28 1.62
 -5 -13 -4 4.41 4.93
 -5 13 -4 -5.07 3.04
 -5 -13 -3 36.16 7.79
 -5 -13 -3 71.9 10.91
 -5 13 -3 67.39 13.47
 -5 -13 -2 3.57 3.74
 -5 -13 -2 1.74 1.84
 -5 13 -2 2.17 2.56
 -5 -13 -1 39.19 8.83
 -5 13 -1 56.32 12.07
 -5 -13 0 17.51 6.8
 -5 13 0 19.62 7.55
 -5 -13 1 138.93 16.67
 -5 13 1 144.68 19.4
 -5 -13 2 53.98 10.52
 -5 13 2 75.71 14.13
 -5 -13 3 97.83 14.52
 -5 13 3 76.33 14.14
 -5 -13 4 0.78 2.94
 -5 13 4 4.84 5.62
 -5 -13 5 79.24 13.78
 -5 13 5 125.33 18.87
 -5 -13 6 32.12 9.4
 -5 13 6 15.51 7.36
 -5 -13 7 -1.2 2.41
 -5 13 7 2.39 3.86
 -5 -13 8 2.94 3.91
 -5 -13 8 9.48 6.52
 -5 13 8 2.22 2.77
 -5 -13 9 25.2 8.05
 -5 -13 9 35.98 10.29
 -5 13 9 10.21 5.46
 -5 -13 10 2.89 3.81
 -5 13 10 -3.88 4.34
 -5 -13 11 38.24 11.1
 -5 -13 12 9.46 6.52
 -5 15 -5 28.52 9.59
 -5 15 -4 6.27 4.59
 -5 -15 -3 43.57 9.45
 -5 15 -3 33.13 10.21
 -5 -15 -2 3.68 4.01
 -5 15 -2 -7.13 6.39
 -5 -15 -1 34.98 8.98
 -5 15 -1 36.37 10.23
 -5 -15 0 1.75 4.24
 -5 15 0 10.84 6.27
 -5 -15 1 4.26 4.22
 -5 15 1 7.75 6.33
 -5 -15 2 1.92 3.51
 -5 15 2 8.4 6.33
 -5 -15 3 12.43 5.51
 -5 15 3 10.72 7.26
 -5 -15 4 2.95 4.15
 -5 15 4 14.27 7.24
 -5 -15 5 57.61 12.33
 -5 15 5 34.9 10.72
 -5 -15 6 7.04 5.23
 -5 15 6 3.71 5.36
 -5 -15 7 13.44 8.06
 -5 15 7 18.57 9.13
 -5 17 -3 23.97 9.16
 -5 -17 -2 0.39 3.14
 -5 17 -2 5.06 6.06
 -5 -17 -1 16.99 7.19
 -5 17 -1 9.66 5.43
 -5 -17 0 2.98 3.5
 -5 17 0 0.81 3.63
 -5 -17 1 12.89 7.1
 -5 17 1 16.88 8.51
 -5 -17 2 9.41 5.86
 -5 17 2 6.68 7.65
 -4 0 -14 42.4 10.75
 -4 0 -13 3.61 3.27
 -4 0 -12 0.88 2.8
 -4 0 -11 0.06 3.52
 -4 0 -10 581.03 31.71
 -4 0 -9 4.12 4.64
 -4 0 -8 126.76 13.47
 -4 0 -7 1.69 2.76
 -4 0 -6 57.01 8.12
 -4 0 -5 -0.4 1.45
 -4 0 -4 8.39 2.78
 -4 0 -4 6.73 2.6
 -4 0 -3 -2.93 2.3
 -4 0 -2 595.57 20.14
 -4 0 -1 0.96 1
 -4 0 -1 -0.06 1.24
 -4 0 0 582.85 20.42
 -4 0 0 619.59 16.43
 -4 0 0 628.93 18.34
 -4 0 1 0.22 0.72
 -4 0 1 1.46 1.3
 -4 0 2 927.06 24.42
 -4 0 3 2.8 1.66
 -4 0 4 292.96 17.22
 -4 0 4 304.3 14.18
 -4 0 5 -0.11 1.79
 -4 0 5 3.17 2.13
 -4 0 5 0.03 0.89
 -4 0 6 90.19 9.49
 -4 0 6 60.38 8.46
 -4 0 6 77.44 8
 -4 0 7 5.22 3.01
 -4 0 7 -0.05 1.43
 -4 0 8 184.43 16.46
 -4 0 8 175.27 13.58
 -4 0 9 1.43 3.04
 -4 0 9 5.85 3.57
 -4 0 10 31.21 6.93
 -4 0 11 -4.16 5.58
 -4 0 12 207.7 21.73
 -4 0 13 -0.85 3.72
 -4 0 14 34.7 9.86
 -4 0 15 -13.99 7.04
 -4 0 16 10.01 5.28
 -4 2 -14 23.19 7.92
 -4 -2 -14 53.37 12.1
 -4 -2 -13 12.24 6.63
 -4 2 -13 7.63 4.64
 -4 2 -12 -3.02 2.44
 -4 -2 -12 12.43 6.02
 -4 -2 -11 31.6 8.38
 -4 2 -11 24.92 7.02
 -4 -2 -10 146.09 16.41
 -4 2 -10 138.08 15.31
 -4 -2 -9 12.84 4.81
 -4 2 -9 22.4 6.35
 -4 -2 -8 135.66 14.53
 -4 2 -8 133.28 13.69
 -4 2 -7 1.57 2.46
 -4 -2 -7 2.47 2.86
 -4 2 -6 214.26 15.6
 -4 -2 -6 223.38 16.39
 -4 -2 -5 31.89 5.86
 -4 2 -5 27.61 5.39
 -4 2 -4 1.64 1.36
 -4 -2 -4 -1.38 2.06
 -4 2 -3 46.65 6.48
 -4 -2 -3 56.31 6.72
 -4 -2 -3 54.67 6.79
 -4 2 -2 756.71 27.57
 -4 -2 -2 797.99 14.23
 -4 -2 -2 782.57 22.89
 -4 2 -2 792.84 24.58
 -4 -2 -2 801.26 24.05
 -4 2 -1 82.85 7.77
 -4 2 -1 95 9.37
 -4 -2 -1 87.67 6.99
 -4 -2 0 434.62 17.46
 -4 2 0 450.03 16.94
 -4 2 0 421.38 19.41
 -4 -2 0 414.94 13.59
 -4 2 0 427.49 16.09
 -4 -2 1 116.89 9.55
 -4 -2 1 129.61 6.77
 -4 2 1 120.9 10.44
 -4 2 1 127.84 8.79
 -4 -2 2 104.43 9.35
 -4 2 2 110.39 8.39
 -4 2 2 96.59 9.1
 -4 -2 2 101.08 6.29
 -4 -2 3 1.67 1.77
 -4 -2 3 4.56 1.5
 -4 2 3 1.65 1.75
 -4 -2 4 105.46 10.03
 -4 -2 4 113.9 11.08
 -4 -2 4 119.61 6.81
 -4 2 4 126.71 10.86
 -4 -2 5 1.89 1.75
 -4 2 5 8.16 3.1
 -4 -2 5 4.95 3.39
 -4 -2 5 6.96 3.1
 -4 -2 5 2.88 1.32
 -4 2 5 1.15 1.13
 -4 -2 6 721.07 28.02
 -4 -2 6 742.51 31.03
 -4 2 6 694.05 25.45
 -4 -2 6 701.33 26.64
 -4 2 6 754.64 28.92
 -4 2 6 681.15 26.65
 -4 -2 6 705.88 20.13
 -4 2 7 307.06 19.48
 -4 -2 7 296.84 20.89
 -4 2 7 291.62 17.47
 -4 -2 7 320.94 19.35
 -4 2 7 275.45 17.83
 -4 -2 7 323.64 14.88
 -4 2 8 571.19 28.18
 -4 -2 8 577.3 29.94
 -4 -2 8 586.85 26.7
 -4 -2 8 551.67 21.77
 -4 2 8 568.08 26.84
 -4 -2 9 -0.41 2.34
 -4 2 9 -2.83 2.78
 -4 -2 9 3.04 2.06
 -4 2 9 4.46 2.45
 -4 2 10 22.54 6.79
 -4 -2 10 16.08 5.75
 -4 -2 10 16.19 5.08
 -4 2 10 23.09 3.44
 -4 2 10 28.16 6.72
 -4 -2 11 8.3 4.86
 -4 2 11 5.34 3.12
 -4 2 11 2.92 1.36
 -4 -2 11 7.36 4.4
 -4 2 11 9.71 5.27
 -4 2 12 134.74 17
 -4 -2 12 134.69 17.97
 -4 -2 12 160.41 16.04
 -4 2 12 133.19 8.41
 -4 2 13 6.3 4.13
 -4 -2 13 -1.51 5.05
 -4 -2 13 1.71 2.23
 -4 -2 14 86.94 15.52
 -4 2 14 65.04 13.07
 -4 2 15 -0.55 3.72
 -4 -2 15 -3.96 5.22
 -4 2 16 47.55 12.96
 -4 -2 16 31.57 10.9
 -4 2 17 2.46 3.33
 -4 2 18 -2.62 4.4
 -4 4 -14 7.25 5.55
 -4 -4 -14 6.61 5.59
 -4 -4 -13 4.97 5.14
 -4 4 -13 9.82 5.17
 -4 -4 -12 47.46 11.04
 -4 4 -12 61.59 11.13
 -4 -4 -11 -2.06 4
 -4 4 -11 3.54 3.97
 -4 -4 -10 50.01 10.07
 -4 4 -10 67.41 10.6
 -4 -4 -9 11.07 4.81
 -4 4 -9 7.2 4.57
 -4 -4 -8 178.81 17.34
 -4 4 -8 171.27 15.41
 -4 4 -7 5.13 3.52
 -4 -4 -7 -2.82 3.27
 -4 -4 -6 258.45 18.46
 -4 4 -6 258.44 17.27
 -4 -4 -5 104.72 11.05
 -4 4 -5 98.32 10.42
 -4 -4 -4 11.36 2.61
 -4 -4 -4 7.68 3.47
 -4 4 -4 6.03 2.79
 -4 -4 -3 175.89 9.9
 -4 4 -3 226.85 14.41
 -4 4 -3 177.52 14.85
 -4 -4 -3 196.24 12.94
 -4 -4 -3 180.01 12.7
 -4 -4 -2 465.79 16.95
 -4 4 -2 461.23 20.16
 -4 4 -2 419.51 21.87
 -4 -4 -2 483.95 18.53
 -4 -4 -2 456.41 18.77
 -4 -4 -1 14.15 3.22
 -4 -4 -1 22.92 4
 -4 -4 -1 14.52 3.09
 -4 4 -1 16.85 3.86
 -4 4 -1 20.35 4.92
 -4 -4 0 149.31 10.54
 -4 -4 0 160.32 8.27
 -4 4 0 157.52 13.02
 -4 4 0 148.94 10.7
 -4 -4 0 155.8 9.48
 -4 -4 1 1.52 1.29
 -4 -4 1 2.44 0.9
 -4 4 1 3.39 2.01
 -4 4 1 1.8 1.64
 -4 -4 2 175.53 12.41
 -4 4 2 179.26 13.91
 -4 4 2 170.31 11.46
 -4 -4 2 196.74 5.57
 -4 -4 3 7.44 2.93
 -4 4 3 4.91 2.47
 -4 4 3 1.72 1.9
 -4 -4 4 154.69 12.65
 -4 -4 4 145.63 11.34
 -4 -4 4 163.07 13.63
 -4 4 4 123.36 12.05
 -4 4 5 13.26 3.9
 -4 -4 5 18.38 4.43
 -4 -4 5 17.93 5.02
 -4 -4 5 17.85 4.54
 -4 4 5 17.02 4.53
 -4 -4 6 419.97 22.05
 -4 4 6 429.18 21.21
 -4 -4 6 445.68 24.29
 -4 4 6 459.38 24.23
 -4 -4 6 443.74 11.42
 -4 -4 7 37.85 7.65
 -4 4 7 31.25 6.14
 -4 -4 7 33.97 6.55
 -4 -4 7 32.7 3.97
 -4 4 7 28.87 6.62
 -4 -4 8 498.29 28.18
 -4 4 8 482.84 24.88
 -4 4 8 506.8 21.54
 -4 -4 8 547.41 27.01
 -4 4 8 526.18 27.8
 -4 -4 9 7.96 4.56
 -4 4 9 12.71 4.69
 -4 -4 9 10.24 3.7
 -4 4 9 7.36 2.3
 -4 4 9 6.55 3.81
 -4 -4 10 105.17 14.36
 -4 4 10 103.19 13.26
 -4 4 10 107.3 10.5
 -4 -4 10 112.04 13.44
 -4 4 10 114.86 14.26
 -4 4 11 9.31 4.43
 -4 -4 11 9.71 5.1
 -4 -4 11 6.31 2.8
 -4 4 11 10.46 3.75
 -4 4 11 13.46 5.67
 -4 4 12 96.41 13.74
 -4 -4 12 103.61 15.68
 -4 4 12 81.22 9.64
 -4 -4 12 95.83 13.2
 -4 4 12 87.63 13.75
 -4 4 13 3.14 4.17
 -4 -4 13 -5.99 6.65
 -4 -4 13 0.23 2.09
 -4 4 13 0.19 3.59
 -4 4 14 27.69 8.01
 -4 -4 14 30.84 9.54
 -4 -4 14 27.77 8.15
 -4 4 14 36.93 9.59
 -4 4 15 -2.01 2.92
 -4 -4 15 1.95 6.78
 -4 -4 15 6.03 4.86
 -4 4 15 5.24 5.16
 -4 4 16 46.9 11.83
 -4 -4 16 10.76 6.87
 -4 -4 16 51.58 10.78
 -4 4 16 32.14 9.95
 -4 4 17 24.41 9.8
 -4 4 17 24.66 9.03
 -4 6 -14 14.5 6.02
 -4 -6 -13 4.26 3.47
 -4 6 -13 5.44 4.52
 -4 6 -12 14.32 6.18
 -4 -6 -12 25.14 8.7
 -4 6 -11 3.12 4.1
 -4 -6 -11 8.18 5.4
 -4 6 -10 5.69 4.57
 -4 -6 -10 1.23 2.92
 -4 -6 -9 -2.15 2.61
 -4 6 -9 4.58 3.75
 -4 -6 -8 15.8 5.57
 -4 6 -8 7.27 3.29
 -4 6 -7 2.26 3.44
 -4 -6 -7 2.19 2.95
 -4 -6 -7 1.21 0.78
 -4 -6 -6 174.04 8.26
 -4 6 -6 173.49 14.71
 -4 -6 -6 155.74 15.38
 -4 -6 -5 13.83 2.77
 -4 6 -5 11.67 3.82
 -4 -6 -5 13.06 4.48
 -4 -6 -4 267.08 12.75
 -4 6 -4 315.37 18.62
 -4 6 -4 283.16 20.58
 -4 -6 -4 310.85 18.69
 -4 -6 -3 33.58 5.82
 -4 -6 -3 29.39 4.54
 -4 -6 -3 33.32 6.05
 -4 6 -3 40.41 6.71
 -4 6 -3 32.8 6.83
 -4 -6 -2 817.13 24.73
 -4 6 -2 910.04 29.81
 -4 6 -2 771.16 32.16
 -4 -6 -2 842.29 26.26
 -4 -6 -2 822.26 26.56
 -4 -6 -1 86.12 8.35
 -4 -6 -1 95.03 7.99
 -4 6 -1 75.05 10.02
 -4 -6 -1 89.04 8.2
 -4 -6 0 530.58 21.31
 -4 -6 0 540.01 16.21
 -4 6 0 523.12 25.9
 -4 -6 0 547.39 18.1
 -4 -6 1 14.87 2.79
 -4 -6 1 9.81 3.35
 -4 -6 1 8.06 3.51
 -4 -6 1 14.91 2.29
 -4 6 1 20.53 5.7
 -4 -6 2 228.28 15.14
 -4 -6 2 192.85 14.41
 -4 6 2 212.3 16.66
 -4 -6 3 0.08 1.48
 -4 -6 3 -0.99 1.77
 -4 6 3 2.17 1.55
 -4 -6 4 417.72 21.86
 -4 -6 4 449.78 20.79
 -4 -6 4 431.41 20.11
 -4 -6 4 439.67 23.33
 -4 6 4 462.09 25.67
 -4 -6 5 30 6.65
 -4 -6 5 30.97 5.4
 -4 -6 5 31.88 6.17
 -4 6 5 28.53 6.55
 -4 6 6 257.97 18.22
 -4 -6 6 265.17 18.61
 -4 -6 6 292.06 15.61
 -4 6 6 265.34 16.25
 -4 -6 6 303.78 20.64
 -4 6 6 257.78 19.82
 -4 6 7 27.95 6.6
 -4 -6 7 42.91 7.65
 -4 -6 7 35.07 5.52
 -4 -6 7 41.29 8.15
 -4 6 7 19.31 4.5
 -4 -6 7 26.91 2.36
 -4 6 7 29.8 7.34
 -4 -6 7 25.65 2.3
 -4 -6 8 104.29 8.75
 -4 -6 8 104.69 12.54
 -4 6 8 100.85 11.72
 -4 -6 8 103.18 13.35
 -4 6 8 112.16 11.66
 -4 -6 8 107.35 6.61
 -4 6 8 117.81 14.27
 -4 -6 9 14.69 6.1
 -4 6 9 22.63 6.14
 -4 -6 9 11.39 2.95
 -4 6 9 19.12 5.56
 -4 -6 9 17.91 5.44
 -4 6 9 6.99 4.66
 -4 -6 9 14.02 3.01
 -4 6 10 3.9 3.76
 -4 -6 10 -0.03 3.27
 -4 -6 10 5.9 3.41
 -4 6 10 3.59 3.36
 -4 6 10 4.71 4
 -4 6 11 8.15 4.68
 -4 -6 11 7.83 5.09
 -4 -6 11 1.93 2.6
 -4 6 11 4.16 4.25
 -4 6 11 15.29 6.38
 -4 6 12 2.17 2.36
 -4 -6 12 1.44 3.49
 -4 -6 12 1.73 2.58
 -4 6 12 7.58 2.59
 -4 6 12 8.84 5.06
 -4 6 13 -3.47 4.14
 -4 -6 13 -4.33 5.42
 -4 -6 13 7.27 5.78
 -4 6 13 0.78 3.44
 -4 6 14 32.66 9.75
 -4 -6 14 33.88 10.09
 -4 -6 14 43.98 10.53
 -4 6 14 40.07 10.81
 -4 -6 15 6.04 5.16
 -4 6 15 -0.45 4.52
 -4 -6 15 -1.46 2.23
 -4 6 15 6.27 6.15
 -4 6 16 53.31 12.28
 -4 -6 16 44.97 10.66
 -4 6 16 71.97 15.16
 -4 6 17 -2.58 3.25
 -4 8 -13 23.08 7.49
 -4 8 -12 9.07 4.62
 -4 -8 -12 16.52 7.32
 -4 8 -11 8.98 4.55
 -4 -8 -11 14.21 7.06
 -4 -8 -10 75 13.4
 -4 8 -10 110.67 14.07
 -4 -8 -9 13.8 5.61
 -4 8 -9 11.95 4.59
 -4 -8 -8 109.9 14.98
 -4 8 -8 94.79 11.91
 -4 -8 -7 11.57 2.56
 -4 -8 -7 2.86 2.71
 -4 8 -7 11.82 4.35
 -4 -8 -6 143.06 9.51
 -4 8 -6 135.03 13.46
 -4 -8 -6 136.52 15.06
 -4 -8 -5 1.76 1.35
 -4 -8 -5 5.74 3.57
 -4 8 -5 1.48 2.61
 -4 8 -5 3.68 4.01
 -4 -8 -4 260.82 14.38
 -4 8 -4 233.31 19.78
 -4 8 -4 283.41 18.53
 -4 -8 -4 290.21 19.46
 -4 -8 -3 2.33 1.4
 -4 8 -3 8.47 3.6
 -4 -8 -3 11.1 3.87
 -4 8 -3 4.67 3.6
 -4 -8 -2 78.04 8.57
 -4 -8 -2 84.31 9.13
 -4 8 -2 74.94 11.18
 -4 -8 -2 88.78 9.64
 -4 -8 -1 56.73 7.61
 -4 -8 -1 47.74 6.28
 -4 8 -1 43.44 8.82
 -4 -8 -1 39.48 5.84
 -4 -8 0 154.29 12.76
 -4 8 0 153.78 15.51
 -4 -8 0 134.4 9.34
 -4 -8 0 122.59 9.23
 -4 -8 1 38.97 4.62
 -4 -8 1 44.32 7.21
 -4 -8 1 40 4.39
 -4 8 1 49.82 9.08
 -4 -8 2 71.16 9.14
 -4 -8 2 74.74 4.2
 -4 8 2 91.14 11.89
 -4 -8 2 78.64 5.47
 -4 -8 3 3.53 3.06
 -4 -8 3 4.07 2.85
 -4 8 3 5.57 3.5
 -4 -8 4 138.33 13.68
 -4 -8 4 138.01 13.86
 -4 -8 4 152.41 14.1
 -4 -8 4 145.06 12.01
 -4 8 4 151.16 16.18
 -4 -8 5 24.49 5.95
 -4 -8 5 25.87 6.08
 -4 -8 5 23.38 5.94
 -4 8 5 33.62 7.96
 -4 -8 6 44.05 8.63
 -4 -8 6 46.79 8.05
 -4 8 6 55.46 10.06
 -4 -8 6 45.96 8.52
 -4 8 6 39.07 8.37
 -4 -8 7 8.42 4.66
 -4 -8 7 13.27 4.65
 -4 -8 7 6.58 3.96
 -4 8 7 15.36 5.49
 -4 8 7 13.72 5.45
 -4 -8 8 155.17 16.1
 -4 -8 8 127.88 13.12
 -4 8 8 121.46 15.15
 -4 8 8 139.7 12.61
 -4 -8 8 145.92 16.31
 -4 8 8 138.87 16.65
 -4 8 9 0.49 1.87
 -4 -8 9 3.61 4.42
 -4 -8 9 -0.87 2.4
 -4 8 9 1.47 3.29
 -4 8 9 -0.66 2.05
 -4 8 10 78.19 10.64
 -4 -8 10 73.25 13.44
 -4 8 10 79.58 12.63
 -4 -8 10 91.74 13.33
 -4 8 10 71.74 12.86
 -4 8 11 7.73 4.43
 -4 -8 11 4.32 4.27
 -4 8 11 2.21 2.82
 -4 -8 11 1.3 2.27
 -4 8 11 9.07 5.35
 -4 8 12 75.77 11.61
 -4 -8 12 99.36 16.31
 -4 8 12 64.62 11.47
 -4 -8 12 70.76 12.25
 -4 8 12 65.62 13.25
 -4 -8 13 1.65 3.33
 -4 8 13 2.51 2.41
 -4 -8 13 2.23 2.6
 -4 8 13 5.58 4.86
 -4 8 14 26.53 8.09
 -4 -8 14 4.79 4.5
 -4 -8 14 23.98 8.15
 -4 8 14 14.3 6.92
 -4 8 15 1.16 3.7
 -4 -8 15 2.72 4.36
 -4 8 15 -1.38 2.86
 -4 -8 16 7.4 6.51
 -4 -10 -12 3.37 4.6
 -4 10 -12 14.1 6.48
 -4 -10 -11 11.35 6.4
 -4 10 -11 3.48 4
 -4 -10 -10 77.19 13.6
 -4 10 -10 67.83 11.07
 -4 -10 -9 15.48 6.49
 -4 10 -9 6.62 3.81
 -4 -10 -8 56.28 11.52
 -4 10 -8 53 9.35
 -4 -10 -7 5.18 4.1
 -4 10 -7 3.68 2.77
 -4 -10 -6 72.42 8.01
 -4 10 -6 71.15 10.28
 -4 -10 -6 72.24 11.47
 -4 -10 -5 143.2 11.68
 -4 10 -5 182.15 15.95
 -4 10 -5 191.78 19.78
 -4 -10 -5 176.82 17.23
 -4 -10 -4 202.05 14.52
 -4 10 -4 196.24 19.08
 -4 -10 -4 191.41 16.91
 -4 -10 -3 73.07 9.21
 -4 -10 -3 69.45 9.71
 -4 10 -3 59.1 10.94
 -4 -10 -2 168.34 14.1
 -4 -10 -2 167.91 13.91
 -4 10 -2 160.66 17.39
 -4 -10 -1 15.19 4.94
 -4 -10 -1 16.38 4.14
 -4 10 -1 14.18 5.42
 -4 -10 -1 17.67 4.35
 -4 -10 0 101.3 11.56
 -4 -10 0 90.09 8.69
 -4 10 0 117.31 14.69
 -4 -10 0 105.16 9.26
 -4 -10 1 5.58 3.47
 -4 -10 1 1.97 1.3
 -4 -10 1 1.45 1.79
 -4 10 1 2.26 2.59
 -4 -10 2 73.54 10.46
 -4 -10 2 78.5 5.05
 -4 -10 2 73.85 5.79
 -4 -10 2 79.1 6.02
 -4 10 2 85.85 12.84
 -4 -10 3 0.46 2.67
 -4 -10 3 3.36 0.97
 -4 -10 3 5.3 1
 -4 10 3 1.74 2.56
 -4 -10 4 97.54 12.4
 -4 10 4 104.57 14.74
 -4 -10 5 2.97 2.66
 -4 -10 5 -1.54 2.66
 -4 10 5 3.46 3.52
 -4 -10 6 57.29 9.86
 -4 10 6 71.72 12.67
 -4 -10 6 74 11.65
 -4 10 6 64.44 11.55
 -4 -10 7 234.92 20.88
 -4 10 7 235.53 22.92
 -4 -10 7 281.8 22.24
 -4 10 7 262.54 24.03
 -4 -10 8 84.37 12.53
 -4 -10 8 67.46 11.94
 -4 10 8 61.73 11.75
 -4 10 8 64.65 12.41
 -4 -10 9 4.16 4.56
 -4 -10 9 6.78 5.22
 -4 10 9 -0.66 3.49
 -4 10 9 2.81 4.57
 -4 10 10 27.12 5.96
 -4 -10 10 38.03 9.43
 -4 -10 10 35.48 9.11
 -4 10 10 33.45 8.95
 -4 10 10 27.65 8.79
 -4 -10 11 1.1 3.15
 -4 10 11 8.7 5.67
 -4 -10 11 4.13 3.21
 -4 10 11 -1.74 3.61
 -4 -10 12 76.49 14.4
 -4 -10 12 52.82 11.64
 -4 10 12 66.32 13.25
 -4 10 12 55.8 12.92
 -4 -10 13 6.27 5.86
 -4 -10 13 -3.83 4.29
 -4 10 13 8.97 5.9
 -4 -10 14 31.29 9.54
 -4 -10 14 38.08 12.04
 -4 -10 15 -2.08 3.04
 -4 -12 -11 1.15 4.25
 -4 12 -11 -3.19 3.62
 -4 -12 -10 17.58 6.36
 -4 12 -10 13.45 5.42
 -4 -12 -9 2.68 3.42
 -4 12 -9 1.63 4.01
 -4 12 -8 39.76 8.39
 -4 -12 -8 41.81 9.93
 -4 -12 -7 -0.25 3.14
 -4 12 -7 6.22 3.89
 -4 -12 -6 11.41 3.72
 -4 -12 -6 12.04 5.14
 -4 -12 -5 9.01 3.68
 -4 -12 -5 8.9 4.01
 -4 12 -5 13.95 6.27
 -4 -12 -4 18.38 5.26
 -4 -12 -4 21.9 5.91
 -4 12 -4 26.49 8.43
 -4 -12 -3 5.68 3.39
 -4 -12 -3 -2.19 2.98
 -4 12 -3 5.7 5.42
 -4 -12 -2 96.65 11.84
 -4 12 -2 95.48 14.68
 -4 -12 -1 9.56 4.57
 -4 12 -1 14.34 6.87
 -4 -12 0 245.01 19.7
 -4 12 0 229.7 22.42
 -4 -12 1 8.59 4.34
 -4 12 1 -0.41 1.98
 -4 -12 2 233.72 20.08
 -4 12 2 233.03 22.8
 -4 -12 3 7.18 4.15
 -4 12 3 -1.5 3.89
 -4 -12 4 87.52 13.13
 -4 12 4 90.69 14.76
 -4 -12 5 23.34 7.14
 -4 12 5 15.87 7.13
 -4 12 6 185.5 22.1
 -4 -12 6 183.16 19.38
 -4 -12 6 184.29 17.64
 -4 12 6 192.44 21.43
 -4 -12 7 21.38 6.6
 -4 -12 7 32.21 8.04
 -4 12 7 13.49 6.19
 -4 -12 8 162.62 17.96
 -4 12 8 169.38 21.55
 -4 -12 8 150.37 18.4
 -4 12 8 127.23 18.56
 -4 -12 9 42.29 9.8
 -4 12 9 9.84 5.58
 -4 -12 9 17.78 6.55
 -4 12 9 29.87 9.72
 -4 -12 10 32.2 9.13
 -4 12 10 38.34 10.86
 -4 -12 10 24.34 7.95
 -4 12 10 19.76 7.79
 -4 -12 11 -3.01 4.36
 -4 12 11 2.96 4.44
 -4 -12 11 11.81 6.74
 -4 12 11 -4.61 6.18
 -4 -12 12 31.28 9.6
 -4 -12 12 11.83 6.24
 -4 12 12 30.62 10.37
 -4 -12 13 9.98 6.51
 -4 -12 13 5.52 4.82
 -4 -14 -9 10.37 6.9
 -4 -14 -8 34.64 9.66
 -4 -14 -7 -1.17 2.92
 -4 -14 -6 69.83 12.72
 -4 14 -6 41.74 10.35
 -4 -14 -5 8.39 4.42
 -4 -14 -5 7 4.91
 -4 14 -5 10.23 5.27
 -4 -14 -4 26.91 6.98
 -4 -14 -4 21.51 6.68
 -4 14 -4 15.98 7.47
 -4 -14 -3 0.15 2.36
 -4 14 -3 -0.13 2.31
 -4 -14 -2 103.39 13.65
 -4 14 -2 86.8 14.55
 -4 -14 -1 2.93 3.51
 -4 14 -1 6.67 4.17
 -4 -14 0 28.52 7.94
 -4 14 0 11.16 5.5
 -4 -14 1 14.23 5.64
 -4 14 1 11.91 5.54
 -4 -14 2 24.26 7.29
 -4 14 2 26.58 8.27
 -4 -14 3 5.71 4.92
 -4 14 3 1.67 3.14
 -4 -14 4 45.15 10.57
 -4 14 4 37.38 9.86
 -4 -14 5 10.05 6.11
 -4 14 5 -0.26 3.37
 -4 -14 6 72.19 13.1
 -4 14 6 70.66 13.89
 -4 -14 7 9.42 4.8
 -4 -14 7 1.27 2.98
 -4 14 7 5.88 5.05
 -4 14 7 -1.17 3.25
 -4 -14 8 53.39 10.6
 -4 14 8 41.3 12.21
 -4 -14 8 41.31 11.12
 -4 14 8 50.4 12.48
 -4 -14 9 10.2 5.63
 -4 14 9 -1.05 2.68
 -4 -14 9 1.81 3.84
 -4 14 9 -5.03 5.43
 -4 -14 10 18.6 6.64
 -4 14 10 21.62 8.9
 -4 -14 10 15.64 6.95
 -4 -14 11 -2.3 3.03
 -4 14 11 11.82 7.09
 -4 -14 12 21.05 8.64
 -4 14 12 29.52 10.41
 -4 16 -6 32.1 9.54
 -4 16 -5 12.57 7.55
 -4 -16 -4 14.02 5.86
 -4 16 -4 13.22 5.55
 -4 -16 -3 4.82 3.8
 -4 16 -3 4.59 5.84
 -4 -16 -2 27.79 8.04
 -4 16 -2 29.4 9.96
 -4 -16 -1 9.93 5.49
 -4 16 -1 1.92 3.02
 -4 -16 0 38.94 9.38
 -4 16 0 31.71 9.55
 -4 -16 1 5.03 4.89
 -4 16 1 -2.37 2.69
 -4 -16 2 29.85 8.51
 -4 16 2 16.71 8.13
 -4 -16 3 3.79 4.24
 -4 16 3 -0.75 3
 -4 -16 4 45.38 10.94
 -4 16 4 36.4 10.97
 -4 -16 5 2.9 4.3
 -4 16 5 8.05 6.75
 -4 -16 6 45.72 11.3
 -4 16 6 35.81 11.06
 -4 16 7 4.65 5.06
 -4 16 8 47.23 13.41
 -4 18 -4 72 15.44
 -4 -18 -3 -1.28 3.46
 -4 18 -3 -1.77 4.11
 -4 -18 -2 24.98 7.39
 -4 18 -2 28.41 9.35
 -4 -18 -1 9.37 5.66
 -4 18 -1 8.77 7.13
 -4 -18 0 34.52 9.71
 -4 18 0 38.41 11.64
 -4 18 1 -1.56 3.52
 -4 18 2 21.02 9.11
 -3 -1 -15 11.39 5.21
 -3 1 -15 13.98 7.04
 -3 -1 -14 3 4.73
 -3 1 -14 7.37 5.93
 -3 -1 -13 85.26 13.84
 -3 1 -13 65.86 11.94
 -3 1 -12 14.34 6.35
 -3 -1 -12 6.44 4.49
 -3 1 -11 10.97 4.76
 -3 -1 -11 7.08 5.07
 -3 -1 -10 156.97 16.26
 -3 1 -10 149.72 15.4
 -3 1 -9 77.41 10.64
 -3 -1 -9 86.02 11.82
 -3 1 -8 12.73 4.35
 -3 -1 -8 8.1 4.16
 -3 -1 -7 282.79 18.75
 -3 1 -7 306.57 18.74
 -3 -1 -6 38.41 6.66
 -3 1 -6 36.6 6.28
 -3 -1 -5 146.96 11.71
 -3 1 -5 138.66 11.1
 -3 -1 -5 142.58 11.38
 -3 1 -5 154.68 11.36
 -3 1 -4 88.6 8.37
 -3 -1 -4 70.99 7.67
 -3 -1 -4 69.24 7.5
 -3 1 -4 81.62 7.89
 -3 -1 -3 361.61 15.51
 -3 1 -3 379.2 15.97
 -3 -1 -3 388.28 16.19
 -3 -1 -2 42.54 4.9
 -3 1 -2 40.49 4.93
 -3 -1 -2 28.72 4.03
 -3 1 -1 30.62 4
 -3 -1 -1 32.72 2.76
 -3 -1 -1 26.16 3.52
 -3 1 -1 22.97 3.98
 -3 1 0 3655.12 40.79
 -3 1 0 3687.75 37.88
 -3 1 0 3512.77 47.33
 -3 -1 0 3655.04 35.69
 -3 -1 1 9897.04 75.56
 -3 -1 1 9856.34 51.98
 -3 -1 1 9561.48 60.05
 -3 1 1 9707.54 63.71
 -3 1 1 9784.79 75.76
 -3 -1 2 2277.71 37.99
 -3 1 2 2214.03 35.8
 -3 -1 2 2301.94 28.24
 -3 -1 3 89.35 7.94
 -3 -1 3 85.51 8.11
 -3 1 3 97.72 8.23
 -3 1 3 86.02 7.11
 -3 -1 3 81.86 5.51
 -3 -1 4 4.15 1.93
 -3 -1 4 4.94 2.75
 -3 1 4 7.1 2.69
 -3 1 4 4.36 2.02
 -3 -1 4 6.71 2.54
 -3 1 4 7.37 2.5
 -3 -1 4 6.12 1.66
 -3 -1 5 234.05 13.42
 -3 1 5 201.99 13.67
 -3 1 5 215.02 12.55
 -3 -1 5 216.51 14.26
 -3 -1 5 230.98 13.83
 -3 -1 5 223 11.13
 -3 1 5 209.85 12.47
 -3 1 6 49.06 6.58
 -3 -1 6 50.63 7.5
 -3 1 6 51.22 7.07
 -3 -1 6 44.32 6.21
 -3 -1 6 49.39 6.74
 -3 1 6 52.75 6.84
 -3 1 7 182.02 7.72
 -3 -1 7 172.98 12.83
 -3 1 7 179.85 12.66
 -3 -1 7 168.66 12.6
 -3 1 7 154.97 13.48
 -3 -1 7 178.42 14.98
 -3 1 8 28.84 3.48
 -3 -1 8 29.83 5.65
 -3 1 8 31.77 6.74
 -3 -1 8 30.28 6.39
 -3 -1 9 279.68 17.64
 -3 1 9 274.33 11.76
 -3 1 9 306.02 21.5
 -3 -1 9 279.36 21.16
 -3 -1 10 3.44 1.69
 -3 -1 10 6.93 4.46
 -3 -1 10 4.07 1.2
 -3 1 10 4.59 4
 -3 1 10 4.31 1.46
 -3 -1 11 72.79 5.27
 -3 1 11 74.98 7.21
 -3 -1 11 79.1 9.91
 -3 -1 11 84.57 13.43
 -3 1 11 64.91 11.47
 -3 -1 12 123.96 7.7
 -3 1 12 138.68 10.43
 -3 1 12 132.77 17.02
 -3 -1 12 130.07 16.95
 -3 -1 13 0.62 3.65
 -3 1 13 7.47 5.32
 -3 -1 14 -15.09 8.33
 -3 1 14 1.05 4.72
 -3 -1 15 69.5 14.54
 -3 1 15 62.56 13.31
 -3 1 16 3.23 4.05
 -3 -1 16 3.58 5.65
 -3 1 17 24.71 10.86
 -3 3 -15 23.49 7.64
 -3 -3 -14 -8.61 6.04
 -3 3 -14 13.09 6.72
 -3 -3 -13 35.15 9.27
 -3 3 -13 56.67 10.89
 -3 -3 -12 16.18 6.42
 -3 3 -12 6.87 3.9
 -3 -3 -11 113.5 15.19
 -3 3 -11 76.5 11.47
 -3 3 -10 21.34 5.85
 -3 -3 -10 31.73 8.35
 -3 -3 -9 99.77 12.99
 -3 3 -9 93.13 11.43
 -3 -3 -8 10.88 3.9
 -3 3 -8 16.24 4.65
 -3 -3 -7 353.39 22.12
 -3 3 -7 396.55 21.04
 -3 -3 -6 12.24 4.05
 -3 3 -6 5.33 2.73
 -3 3 -5 169.06 12.37
 -3 -3 -5 140.34 12.17
 -3 -3 -4 5.03 2.61
 -3 3 -4 7.64 2.73
 -3 -3 -4 3.29 2.22
 -3 -3 -3 366.75 11.4
 -3 -3 -3 384.76 17.05
 -3 3 -3 420.37 17.56
 -3 -3 -3 362.65 16.54
 -3 -3 -2 1.29 0.74
 -3 -3 -2 1.77 1.3
 -3 3 -2 1.8 1.88
 -3 -3 -2 1.86 1.51
 -3 3 -2 1.94 1.67
 -3 -3 -1 213.24 10.09
 -3 3 -1 214.19 11.43
 -3 3 -1 208.04 13.29
 -3 -3 -1 201.26 9.7
 -3 -3 -1 237.22 10.92
 -3 -3 0 20.05 3.34
 -3 -3 0 23.09 3.11
 -3 3 0 19.51 3.48
 -3 -3 0 22.11 2.75
 -3 3 0 21.21 4.37
 -3 -3 1 418.17 15.86
 -3 3 1 450.42 15.74
 -3 3 1 399.11 18.02
 -3 -3 1 424.79 9.01
 -3 -3 2 1.21 1.56
 -3 3 2 2.92 1.39
 -3 3 2 3.89 2.52
 -3 -3 3 325.82 15.47
 -3 -3 3 329.2 12.28
 -3 -3 3 312.73 14.3
 -3 -3 3 326.97 16.32
 -3 3 3 324.48 16.46
 -3 -3 4 4.8 1.46
 -3 -3 4 4.05 1.79
 -3 3 4 4.49 2.23
 -3 -3 4 4.61 2.17
 -3 -3 4 5.19 2.09
 -3 -3 4 5.5 1.02
 -3 3 4 4.47 2.71
 -3 3 5 286.87 15.65
 -3 -3 5 338.98 18.64
 -3 -3 5 299.2 15.75
 -3 3 5 291.06 14.34
 -3 3 5 319.93 14.62
 -3 -3 5 304.99 16.31
 -3 -3 5 289.36 9.29
 -3 3 5 310.12 17.53
 -3 -3 6 11.7 3.46
 -3 3 6 14.28 3.95
 -3 -3 6 11.46 1.76
 -3 3 6 11.57 3.15
 -3 -3 6 7.69 3.29
 -3 3 6 9.54 2.93
 -3 -3 6 17.27 4.43
 -3 3 6 13.05 4.07
 -3 3 7 67.14 7.68
 -3 3 7 66.37 8.67
 -3 -3 7 64.98 9.04
 -3 3 7 79.43 7.91
 -3 -3 7 64.2 8.18
 -3 -3 7 68.28 4
 -3 3 7 68.21 9.17
 -3 -3 8 11.67 4.67
 -3 3 8 16.48 4.69
 -3 -3 8 13.52 1.86
 -3 3 8 9.67 2.93
 -3 3 8 10.82 3.27
 -3 -3 8 15.25 4.04
 -3 3 8 20.21 5.28
 -3 -3 9 327.05 19.84
 -3 -3 9 329.13 9.54
 -3 3 9 351.72 18.1
 -3 -3 9 353.99 24.56
 -3 3 9 357.49 22.58
 -3 -3 10 26.63 2.99
 -3 -3 10 29.32 6.46
 -3 3 10 31.52 5.7
 -3 -3 10 27.58 7.57
 -3 3 10 33.05 7.89
 -3 -3 11 148.55 7.37
 -3 -3 11 159.12 14.89
 -3 3 11 155.43 12.91
 -3 -3 11 149.32 6.98
 -3 3 11 170.64 17.5
 -3 -3 11 154.96 17.88
 -3 -3 12 28 6.63
 -3 3 12 26.72 5.98
 -3 3 12 22.79 7.28
 -3 -3 12 21.92 7.71
 -3 -3 13 77.77 11.36
 -3 3 13 62.61 8.74
 -3 -3 13 76.48 14.15
 -3 3 13 78.16 13.29
 -3 -3 14 5.23 2.73
 -3 -3 14 7.7 4.87
 -3 3 14 7.36 5.81
 -3 -3 15 49.54 9.36
 -3 3 15 48.62 11.56
 -3 -3 15 54.49 12.81
 -3 3 16 -6.22 6.9
 -3 -3 16 1.85 2.99
 -3 3 17 34.45 10.91
 -3 5 -15 9.16 4.8
 -3 5 -14 -0.4 2.88
 -3 -5 -14 3.39 4.24
 -3 -5 -13 57.8 12.45
 -3 5 -13 56.88 10.77
 -3 -5 -12 13.93 6.49
 -3 5 -12 1.51 2.87
 -3 -5 -11 57.08 11.45
 -3 5 -11 75.83 11.28
 -3 -5 -10 5.59 4.16
 -3 5 -10 7.71 4.58
 -3 -5 -9 33.82 8.23
 -3 5 -9 25.17 5.85
 -3 5 -8 6.63 3.29
 -3 -5 -8 5.65 3.5
 -3 -5 -7 458.1 26.01
 -3 5 -7 420.67 21.71
 -3 -5 -6 0.97 0.63
 -3 5 -6 0.98 1.28
 -3 -5 -6 2.26 1.61
 -3 -5 -5 293.78 9.86
 -3 -5 -5 324.38 8.39
 -3 5 -5 331.46 17.85
 -3 -5 -5 318.05 19.29
 -3 -5 -4 41.14 4.23
 -3 5 -4 64.01 7.71
 -3 -5 -4 50.61 7.28
 -3 -5 -4 53.03 7.46
 -3 -5 -3 123.08 7.73
 -3 5 -3 134.38 10.69
 -3 5 -3 100.04 10.55
 -3 -5 -3 123.46 10.42
 -3 -5 -3 128.79 10.59
 -3 -5 -2 4.1 1.58
 -3 -5 -2 2.55 1.77
 -3 5 -2 2.97 1.91
 -3 -5 -2 2.76 1.63
 -3 5 -2 2.7 2.98
 -3 -5 -1 342.72 14.28
 -3 -5 -1 370.34 19.97
 -3 5 -1 339.91 16.03
 -3 -5 -1 327.76 13.65
 -3 5 -1 333.68 18.56
 -3 -5 -1 350.25 14.57
 -3 -5 0 42.53 5.24
 -3 -5 0 43.85 6.66
 -3 -5 0 41 4.2
 -3 5 0 35.3 6.07
 -3 -5 0 44.14 4.55
 -3 -5 1 14.89 2.38
 -3 -5 1 12.35 3.07
 -3 -5 1 15.38 4.11
 -3 -5 1 18.73 2.21
 -3 5 1 20.64 3.9
 -3 5 1 12.29 3.47
 -3 -5 2 23.62 4.46
 -3 -5 2 25.47 4.71
 -3 5 2 17.55 3.67
 -3 5 2 22.83 5
 -3 -5 3 395.22 18.14
 -3 -5 3 409.15 18.43
 -3 -5 3 382.13 16.17
 -3 -5 3 445.58 19.92
 -3 5 3 418.96 21.18
 -3 5 3 406.85 17.18
 -3 -5 4 15.05 3.39
 -3 -5 4 13.72 3.55
 -3 -5 4 11.82 3.61
 -3 -5 4 11.72 3.29
 -3 5 4 15.36 4.58
 -3 5 4 20.34 5.02
 -3 -5 5 235.32 15.24
 -3 -5 5 206.56 12.73
 -3 5 5 224.84 15.59
 -3 5 5 212.91 12.6
 -3 -5 5 246.41 16.54
 -3 -5 5 215.19 13.69
 -3 5 5 218.9 16.44
 -3 -5 5 209.12 6.03
 -3 -5 6 50.8 6.18
 -3 -5 6 49.75 7.34
 -3 5 6 59.72 8.15
 -3 -5 6 52.95 7.11
 -3 5 6 56.8 7.06
 -3 -5 6 51.66 7.87
 -3 -5 6 46.57 4
 -3 5 6 62.89 9.13
 -3 -5 7 302.09 20.59
 -3 5 7 282.51 15.26
 -3 5 7 289.74 17
 -3 5 7 294.82 18.86
 -3 -5 7 294.24 14.69
 -3 -5 7 294.74 18.57
 -3 5 7 284.62 19.95
 -3 -5 8 2.47 1.65
 -3 5 8 -0.12 1.37
 -3 -5 8 3.14 4.06
 -3 5 8 -5.05 3.68
 -3 -5 8 3.44 2.39
 -3 5 8 -0.91 2.2
 -3 5 8 -0.48 1.79
 -3 5 9 318.74 20.78
 -3 -5 9 345.9 24.74
 -3 5 9 322.63 20.55
 -3 -5 9 335.1 15.32
 -3 -5 9 344.3 21.9
 -3 5 9 359.35 24.54
 -3 -5 10 -0.65 4.59
 -3 5 10 2 2.79
 -3 -5 10 4.3 1.99
 -3 5 10 3.76 2.94
 -3 -5 10 -3.21 3.28
 -3 5 10 3.12 4.1
 -3 5 11 66.12 10.87
 -3 -5 11 48.45 10.76
 -3 5 11 66.8 10.07
 -3 -5 11 54.71 9.8
 -3 5 11 51.17 10.45
 -3 5 12 8.29 3.72
 -3 -5 12 1.95 2.37
 -3 -5 12 7.69 5.23
 -3 5 12 4.93 2.6
 -3 -5 13 37.24 8.6
 -3 5 13 35.57 8.12
 -3 5 13 22.06 8
 -3 -5 13 39.08 10.69
 -3 -5 14 4.82 4.41
 -3 -5 14 -0.15 3.33
 -3 5 14 -5.63 5.23
 -3 -5 15 65.31 11.69
 -3 5 15 48.76 11.46
 -3 -5 15 47.07 12.77
 -3 -5 16 2.32 4.12
 -3 5 16 6.15 5.45
 -3 5 17 5.18 5.38
 -3 7 -14 2.76 3.67
 -3 7 -13 57.93 10.67
 -3 -7 -13 40.26 11.13
 -3 7 -12 -1.14 2.16
 -3 -7 -12 1.39 5.29
 -3 7 -11 23.05 6.76
 -3 -7 -11 10.72 5.83
 -3 7 -10 23.36 6.87
 -3 -7 -10 15.77 5.69
 -3 -7 -10 15.42 3.31
 -3 7 -9 75.07 10.34
 -3 -7 -9 70.23 11.91
 -3 -7 -9 80.51 6.68
 -3 -7 -8 42.04 8.5
 -3 7 -8 40.24 7.29
 -3 -7 -8 41.23 4.3
 -3 -7 -7 86.53 5.59
 -3 -7 -7 81.29 11.64
 -3 -7 -7 86.03 5.32
 -3 7 -7 86.27 10.36
 -3 -7 -6 1.71 1.42
 -3 -7 -6 1.5 1.87
 -3 7 -6 -1.13 1.66
 -3 -7 -5 242.76 11.41
 -3 7 -5 248.62 16.1
 -3 -7 -5 227.88 17.53
 -3 -7 -4 20.47 3.83
 -3 -7 -4 26.27 5.61
 -3 7 -4 20.82 4.98
 -3 7 -4 16.4 4.79
 -3 -7 -3 358.92 15.38
 -3 7 -3 368.33 18.55
 -3 7 -3 354.86 21.44
 -3 -7 -3 376.24 19.6
 -3 -7 -3 382.85 20.04
 -3 -7 -2 50.89 6.06
 -3 -7 -2 56.06 7.04
 -3 7 -2 54.01 8.34
 -3 -7 -1 102.56 8.95
 -3 7 -1 119.18 12.25
 -3 -7 -1 97.69 8.78
 -3 -7 0 127.31 10.21
 -3 -7 0 139.77 13.86
 -3 7 0 142.34 13.24
 -3 -7 0 150.57 9.62
 -3 -7 1 179.45 15.48
 -3 -7 1 176.26 12.54
 -3 7 1 146.88 13.56
 -3 7 1 150.79 11.43
 -3 -7 1 156.26 8.31
 -3 -7 2 66.32 8.06
 -3 -7 2 59.5 8.85
 -3 -7 2 65.15 3.58
 -3 7 2 64.37 7.61
 -3 -7 2 63.96 4.23
 -3 7 2 73.3 9.85
 -3 7 3 194.75 16.74
 -3 -7 3 188.1 13.96
 -3 -7 3 172.61 14.9
 -3 -7 3 185.16 13.22
 -3 -7 3 183.51 11.66
 -3 7 3 183.08 15.5
 -3 -7 4 39.84 6.88
 -3 -7 4 29.18 6.45
 -3 -7 4 25.35 4.66
 -3 -7 4 35.66 6.33
 -3 7 4 26.17 6.73
 -3 7 4 31.64 6.77
 -3 7 5 272.54 20.32
 -3 -7 5 300.36 19.29
 -3 -7 5 326.94 19.72
 -3 -7 5 339.19 19.9
 -3 -7 5 315.37 17.21
 -3 7 5 323.7 21.92
 -3 -7 5 297.7 7.53
 -3 -7 6 5.38 3.25
 -3 -7 6 10.03 3.79
 -3 7 6 9.33 3
 -3 -7 6 12.42 4.51
 -3 7 6 8.32 4.02
 -3 7 6 7.22 3.72
 -3 -7 6 7.48 1.61
 -3 -7 7 218.34 16.01
 -3 7 7 239.9 19.69
 -3 -7 7 210.52 16.82
 -3 7 7 239.05 14.73
 -3 -7 7 251.05 19.03
 -3 -7 7 249.12 10.89
 -3 7 7 294.13 21.87
 -3 -7 8 -0.14 1.36
 -3 -7 8 -1.71 2.26
 -3 7 8 0.51 1.3
 -3 7 8 1.96 3.02
 -3 -7 8 0.53 1.81
 -3 -7 8 1.84 1.52
 -3 7 8 1.51 3.41
 -3 -7 9 61.78 9.69
 -3 7 9 66.55 10.93
 -3 -7 9 66.07 11.3
 -3 7 9 63.24 8.09
 -3 7 9 80.7 9.94
 -3 -7 9 49.24 7.62
 -3 -7 9 59.62 6.78
 -3 7 9 59.08 10.78
 -3 -7 10 84.08 13.19
 -3 7 10 74.63 10.45
 -3 -7 10 68.85 10.82
 -3 7 10 99.18 13.51
 -3 7 10 82.66 13.12
 -3 -7 11 112.38 16.05
 -3 7 11 115.75 13.45
 -3 -7 11 133.35 15.4
 -3 7 11 81.4 12.49
 -3 7 11 109.08 15.72
 -3 -7 12 17.71 6.78
 -3 7 12 31.29 7.81
 -3 7 12 14.25 5.41
 -3 -7 12 24.34 6.89
 -3 7 12 19.9 7.53
 -3 -7 13 22.48 7.3
 -3 7 13 24.4 7.49
 -3 -7 13 31.97 8.74
 -3 7 13 18.1 6.1
 -3 7 13 11.34 4.82
 -3 -7 14 3.49 3.79
 -3 7 14 -4.48 4.93
 -3 -7 14 6.01 5.45
 -3 7 14 3.38 4.74
 -3 7 15 65.95 12.81
 -3 -7 15 30.32 10.1
 -3 -7 15 56.85 12.05
 -3 7 15 44.89 12.29
 -3 7 16 -0.41 5.36
 -3 7 17 17.6 8.27
 -3 9 -14 -0.7 3.06
 -3 -9 -13 40.39 12.09
 -3 9 -13 40.46 9.36
 -3 -9 -12 7.43 5.53
 -3 9 -12 11.54 5.52
 -3 -9 -11 7.93 5.5
 -3 9 -11 0.66 2.52
 -3 -9 -10 13.26 5.84
 -3 9 -10 16.69 5.46
 -3 9 -9 123.62 13.55
 -3 -9 -9 123.18 16.71
 -3 -9 -8 5.56 4.26
 -3 9 -8 16.54 5.15
 -3 -9 -7 113.43 8.39
 -3 -9 -7 103.85 13.92
 -3 9 -7 95.66 11.1
 -3 -9 -6 9.31 2.86
 -3 -9 -6 1.77 2.6
 -3 9 -6 7.03 3.87
 -3 -9 -5 173.7 11.6
 -3 9 -5 179.26 14.54
 -3 9 -5 177.89 17.4
 -3 -9 -4 -1.15 1.45
 -3 9 -4 1.64 2.23
 -3 9 -4 4.54 2.87
 -3 -9 -3 139.45 11.22
 -3 9 -3 132.52 14.23
 -3 -9 -2 9.03 2.97
 -3 -9 -2 14.21 4.18
 -3 9 -2 13.67 4.94
 -3 -9 -1 65.44 8.1
 -3 9 -1 64.81 9.91
 -3 -9 -1 64.48 7.84
 -3 -9 0 15.79 4.05
 -3 9 0 20.17 5.48
 -3 -9 0 12.79 3.39
 -3 -9 1 933.97 32.16
 -3 9 1 918.8 37.36
 -3 -9 1 930.44 23.34
 -3 -9 2 26.67 5.66
 -3 -9 2 20.07 2.64
 -3 -9 2 21.76 2.94
 -3 9 2 17.74 5.52
 -3 9 3 102.39 13.75
 -3 -9 3 80.4 10.21
 -3 -9 3 79.47 7.96
 -3 -9 3 93.83 5.16
 -3 -9 3 93.88 4.17
 -3 9 3 82.09 11.7
 -3 -9 4 4.29 2.3
 -3 9 4 7.73 4.57
 -3 -9 4 1.76 1.93
 -3 -9 4 6.42 2.7
 -3 -9 4 6.57 1.43
 -3 9 4 9.14 5
 -3 9 5 128.94 15.65
 -3 -9 5 142.03 14.05
 -3 -9 5 133.37 12.93
 -3 9 5 157.04 16.62
 -3 -9 5 118.9 5.98
 -3 -9 6 6.35 4
 -3 9 6 7 3.68
 -3 -9 6 9.16 4.09
 -3 -9 6 5.43 1.62
 -3 9 6 11.44 4.47
 -3 -9 6 7.45 1.66
 -3 9 7 306.47 25.01
 -3 -9 7 290.11 21.52
 -3 -9 7 305.08 22.37
 -3 -9 7 345.47 22.99
 -3 9 7 282.32 14.84
 -3 9 7 304.9 24.23
 -3 -9 7 299.18 12.01
 -3 -9 8 -1.93 2.75
 -3 9 8 1.44 1.33
 -3 -9 8 3.9 2.71
 -3 -9 8 1.52 2.13
 -3 9 8 6.49 4.62
 -3 9 8 1.96 2.75
 -3 9 9 113.42 11.21
 -3 -9 9 102.53 13.97
 -3 9 9 116.77 16.22
 -3 -9 9 104.18 13.61
 -3 9 9 104.22 15.13
 -3 -9 10 3.47 3.31
 -3 9 10 9.5 3.91
 -3 9 10 8.98 4.18
 -3 -9 10 15.12 5.8
 -3 9 10 15.75 6.58
 -3 9 11 86.87 11.32
 -3 -9 11 86.59 13.75
 -3 -9 11 90.21 13.68
 -3 9 11 86.21 14.55
 -3 9 11 101.39 16.09
 -3 -9 12 9.47 5.45
 -3 9 12 6.82 4.13
 -3 9 12 3.25 2.43
 -3 9 12 -1.42 4.11
 -3 9 13 7.8 4.07
 -3 -9 13 9.25 5.59
 -3 -9 13 8.11 4.89
 -3 9 13 7.56 5.97
 -3 9 13 4.27 5.97
 -3 -9 14 3.03 5.02
 -3 -9 14 -0.24 2.94
 -3 9 14 0.11 4.14
 -3 -9 15 26.51 8.78
 -3 -9 16 -1.89 4.02
 -3 11 -13 21.95 7.34
 -3 -11 -12 7.63 4.83
 -3 11 -12 -0.78 2.37
 -3 -11 -11 67.33 14.1
 -3 11 -11 49.66 9.64
 -3 -11 -10 -0.44 3.56
 -3 11 -10 4.36 2.49
 -3 11 -9 57.62 9.76
 -3 -11 -9 45.06 10.46
 -3 -11 -8 -1.71 3.84
 -3 11 -8 4.55 3.8
 -3 -11 -7 55.94 7.07
 -3 -11 -7 44.22 9.59
 -3 11 -7 53.88 8.99
 -3 -11 -6 15.87 3.98
 -3 11 -6 16.16 4.88
 -3 -11 -5 60.92 7.9
 -3 11 -5 51.75 10.26
 -3 -11 -4 -3.88 3.11
 -3 11 -4 3.29 4.57
 -3 -11 -3 109.13 11.18
 -3 11 -3 94.99 13.15
 -3 -11 -2 -4.46 3.02
 -3 11 -2 2.34 2.1
 -3 -11 -1 88.96 10.64
 -3 11 -1 80.46 12.09
 -3 -11 -1 83.42 9.77
 -3 -11 0 40.98 7.57
 -3 11 0 55.07 9.84
 -3 -11 0 34.89 5.71
 -3 -11 1 202.75 16.55
 -3 11 1 206.29 19.67
 -3 -11 1 188.32 11.83
 -3 -11 2 71.2 10
 -3 -11 2 67.77 5.84
 -3 -11 2 68.29 6.19
 -3 11 2 63.68 11.55
 -3 11 3 105.31 15.55
 -3 -11 3 96.84 11.89
 -3 -11 3 85.64 8.48
 -3 -11 3 96.5 6.58
 -3 -11 3 99.51 5.6
 -3 11 3 91.95 13.43
 -3 11 4 7 4.16
 -3 -11 4 -0.2 2.49
 -3 -11 4 9.1 4.21
 -3 -11 4 2.96 1.92
 -3 -11 4 5.75 1.76
 -3 11 4 0.72 2.02
 -3 -11 5 88.36 12.34
 -3 11 5 86.19 14.49
 -3 -11 5 85.51 10.63
 -3 -11 5 79.47 5.77
 -3 11 5 87.62 13.51
 -3 -11 6 18.66 5.84
 -3 -11 6 16.6 5.91
 -3 11 6 6.5 5.63
 -3 11 6 12.23 5.86
 -3 -11 7 47.56 9.16
 -3 11 7 46.2 10.92
 -3 -11 7 48.06 9.51
 -3 11 7 54.95 11.47
 -3 -11 8 16.07 5.9
 -3 11 8 7.55 4.58
 -3 -11 8 11.06 5.45
 -3 11 8 20.39 6.96
 -3 -11 9 63.85 11.18
 -3 -11 9 65.71 11.8
 -3 11 9 54.49 12.28
 -3 11 9 63.39 12.88
 -3 -11 10 0.05 2.72
 -3 -11 10 5.26 3.36
 -3 11 10 2.89 2.97
 -3 11 10 6.64 5.29
 -3 -11 11 56.95 11.64
 -3 -11 11 64.98 12.54
 -3 11 11 82.06 15.7
 -3 11 11 63.63 13.93
 -3 -11 12 3.42 4.97
 -3 -11 12 3.08 3.26
 -3 11 12 -0.32 2.55
 -3 11 12 0.55 3.98
 -3 -11 13 22.4 8.33
 -3 11 13 44.73 11.51
 -3 -11 13 38.66 10.15
 -3 11 13 27.22 9.03
 -3 -11 14 1.31 3.63
 -3 -11 14 -4.99 6.34
 -3 -11 15 14.68 7.26
 -3 13 -12 4.33 4.53
 -3 13 -11 16.45 5.91
 -3 -13 -10 18.79 8.32
 -3 13 -10 9.08 4.3
 -3 -13 -9 18.98 7.84
 -3 13 -9 21.45 6.78
 -3 -13 -8 4.51 3.68
 -3 -13 -6 9.82 3.27
 -3 13 -6 23.34 7.67
 -3 -13 -5 24.58 5.84
 -3 13 -5 27.78 7.99
 -3 -13 -4 6.32 2.62
 -3 13 -4 11.47 5.57
 -3 -13 -3 38.68 7.56
 -3 13 -3 34.24 8.68
 -3 -13 -2 36.47 7.56
 -3 13 -2 44.59 9.57
 -3 -13 -1 134.34 14.39
 -3 13 -1 120.73 16.01
 -3 -13 0 -1.64 2.44
 -3 13 0 -0.04 2.78
 -3 -13 1 204.68 18.26
 -3 13 1 165.26 18.82
 -3 -13 2 1.22 2.78
 -3 13 2 0.82 2.48
 -3 -13 3 136.75 15.37
 -3 13 3 139.98 19.55
 -3 13 3 134.28 17.31
 -3 13 4 21.48 7.95
 -3 -13 4 16.36 5.89
 -3 13 4 17.43 6.95
 -3 -13 5 40.44 7.38
 -3 13 5 31.64 9.43
 -3 -13 5 43.79 9.53
 -3 13 5 45.39 11.03
 -3 -13 6 15.84 5.08
 -3 -13 6 16.2 6.9
 -3 13 6 8.22 4.71
 -3 13 6 11.56 4.95
 -3 -13 7 26.59 7.17
 -3 -13 7 17.83 6.92
 -3 13 7 15.73 7.01
 -3 13 7 14.24 6.67
 -3 -13 8 11.67 4.9
 -3 -13 8 9.2 4.2
 -3 13 8 9.75 6.7
 -3 13 8 11.91 6.32
 -3 -13 9 84.26 13.17
 -3 13 9 118.43 18.95
 -3 -13 9 98.55 15.51
 -3 13 9 80.43 14.96
 -3 -13 10 3.55 4.13
 -3 13 10 4.03 6.65
 -3 -13 10 6.68 6.11
 -3 13 10 7.02 5.08
 -3 -13 11 16.22 6.6
 -3 -13 11 8.63 4.9
 -3 13 11 36.71 11.6
 -3 13 11 27.68 10.5
 -3 -13 12 26.19 8.59
 -3 13 12 23.09 10.62
 -3 -13 12 34.59 10.12
 -3 13 13 17.27 8.68
 -3 -13 13 27.61 9.95
 -3 -15 -9 8.84 4.61
 -3 -15 -8 6.9 5.4
 -3 15 -6 3.12 3.76
 -3 -15 -5 40.21 8.18
 -3 15 -5 31.76 8.67
 -3 -15 -4 -0.74 2.45
 -3 15 -4 2.1 3.36
 -3 -15 -3 49.08 9.59
 -3 15 -3 61.67 12.38
 -3 -15 -2 -0.1 2.86
 -3 15 -2 3.31 3.44
 -3 -15 -1 68.41 11.4
 -3 15 -1 77.1 14.14
 -3 -15 0 -4.58 4.05
 -3 15 0 -3.26 4.81
 -3 -15 1 106.18 14.28
 -3 15 1 139.23 18.77
 -3 -15 2 7.39 4.77
 -3 15 2 3.37 2.74
 -3 -15 3 62.94 11.64
 -3 15 3 69.48 13.64
 -3 15 4 3.26 5.87
 -3 -15 4 -0.68 4.06
 -3 15 4 5.04 4.89
 -3 15 5 39.64 11.58
 -3 -15 5 38.25 9.51
 -3 15 5 43.19 11.39
 -3 -15 6 9.57 5.69
 -3 15 6 -1.85 3.57
 -3 15 6 10.85 5.8
 -3 -15 7 34.25 9.74
 -3 15 7 48.1 13.01
 -3 15 7 26.91 9.45
 -3 15 8 -4.75 5.58
 -3 -15 8 7.12 5.11
 -3 15 8 1.54 3.88
 -3 15 9 28.23 10.95
 -3 -15 9 44.07 11.06
 -3 15 9 30.73 10.19
 -3 15 10 13.62 8.03
 -3 15 11 13.04 7.38
 -3 17 -6 13.23 7.12
 -3 17 -5 22.77 8.14
 -3 -17 -4 0.56 2.32
 -3 17 -4 10.45 6.12
 -3 -17 -3 17.95 6.37
 -3 17 -3 43.9 15.19
 -3 -17 -2 0.6 2.51
 -3 17 -2 1.29 2.74
 -3 -17 -1 16.22 6.32
 -3 17 -1 9.54 7.65
 -3 -17 0 13.03 5.86
 -3 17 0 3.05 4.71
 -3 -17 1 46.41 10.31
 -3 17 1 39.46 11.48
 -3 -17 2 2.44 3.09
 -3 17 2 0.84 3.57
 -3 -17 3 10.3 5.11
 -3 17 3 8.03 4.77
 -3 -17 4 -0.98 2.54
 -3 17 4 -1.79 4.46
 -3 17 5 22.46 8.78
 -3 17 6 2.59 5.44
 -3 19 -2 -0.12 4.39
 -3 19 -1 26.47 9.3
 -3 19 0 9.11 5.59
 -3 19 1 27.38 10.41
 -2 0 -15 -0.79 2.98
 -2 0 -14 15.13 6.5
 -2 0 -13 1.27 4.56
 -2 0 -12 51.72 10.16
 -2 0 -11 -3.98 4.12
 -2 0 -10 544.45 29.06
 -2 0 -9 6.21 4.34
 -2 0 -8 25.43 5.83
 -2 0 -7 0.29 1.89
 -2 0 -6 53.85 6.74
 -2 0 -6 62.39 7.66
 -2 0 -5 1.4 1.54
 -2 0 -5 -0.41 1.58
 -2 0 -4 365.31 15.93
 -2 0 -4 366.06 15.17
 -2 0 -3 0.47 1.09
 -2 0 -3 -0.24 1.04
 -2 0 -2 752.32 18.26
 -2 0 -2 752.45 18.06
 -2 0 -1 0.27 0.72
 -2 0 0 671.42 11.82
 -2 0 0 629.44 14.8
 -2 0 0 676 13.31
 -2 0 1 0.21 0.47
 -2 0 2 685.99 18.01
 -2 0 2 680.96 14.69
 -2 0 3 0.43 1.46
 -2 0 3 1.91 1.37
 -2 0 3 0.91 0.97
 -2 0 3 -0.05 0.63
 -2 0 4 665.71 19.54
 -2 0 4 693.99 19.16
 -2 0 4 684.94 21.49
 -2 0 5 0.55 1.18
 -2 0 5 -0.8 1.33
 -2 0 5 -0.3 1.03
 -2 0 6 23.47 4.07
 -2 0 6 21.16 4.93
 -2 0 6 20.1 2.51
 -2 0 6 15.75 3.45
 -2 0 7 1.94 1.8
 -2 0 7 5.58 3.72
 -2 0 7 1.04 0.96
 -2 0 7 1.01 1.42
 -2 0 8 81.85 8.15
 -2 0 8 78.03 6.17
 -2 0 8 70.89 10.06
 -2 0 9 2.55 1.84
 -2 0 9 5.78 3.77
 -2 0 9 -1.11 1.01
 -2 0 10 173.41 11.27
 -2 0 10 183.08 17.94
 -2 0 11 2.1 1.74
 -2 0 11 3.82 4.88
 -2 0 12 885.16 28.87
 -2 0 12 980.76 44.97
 -2 0 13 1.8 2.8
 -2 0 13 -0.14 1.44
 -2 0 14 11.67 5.94
 -2 0 15 8.71 5.92
 -2 0 16 18.18 8.02
 -2 2 -16 7.71 6.08
 -2 -2 -15 13.99 6.42
 -2 2 -15 6.73 3.8
 -2 -2 -14 53.24 11.98
 -2 2 -14 51.7 10.88
 -2 -2 -13 4.77 3.64
 -2 2 -13 11.21 5.43
 -2 -2 -12 87.14 13.78
 -2 2 -12 97.68 13.46
 -2 -2 -11 6.08 4.08
 -2 2 -11 13.27 4.87
 -2 2 -10 240.54 18.7
 -2 -2 -10 214.47 19.2
 -2 -2 -9 2.48 3.32
 -2 2 -9 3.17 3.05
 -2 -2 -8 17.83 5.52
 -2 2 -8 14.72 4.45
 -2 2 -7 16.35 4.15
 -2 -2 -7 9.02 3.73
 -2 2 -7 11.45 3.84
 -2 -2 -6 769.34 29.04
 -2 2 -6 771.05 26.09
 -2 -2 -6 823.99 28.35
 -2 2 -6 788.38 24.75
 -2 -2 -5 592.41 23.35
 -2 2 -5 594.63 21.2
 -2 -2 -5 552.12 21.73
 -2 2 -5 565.11 19.6
 -2 -2 -4 1355.43 32.68
 -2 2 -4 1403.97 30.39
 -2 -2 -4 1385.2 31.94
 -2 2 -4 1402.83 28.97
 -2 -2 -3 2.06 0.6
 -2 -2 -3 0.22 1.08
 -2 2 -3 4.84 1.97
 -2 -2 -3 3.03 1.53
 -2 -2 -2 156.87 5.98
 -2 2 -2 153.36 9.92
 -2 -2 -2 144.18 8.57
 -2 2 -2 164.08 9
 -2 -2 -2 160.11 8.91
 -2 -2 -1 20.28 2.38
 -2 -2 -1 16.75 2.72
 -2 -2 -1 21.31 2.78
 -2 2 -1 15.96 2.61
 -2 2 -1 18.66 3.33
 -2 -2 0 141.48 7.01
 -2 2 0 154.06 7.62
 -2 -2 0 142.16 5.63
 -2 2 0 149.81 8.97
 -2 -2 0 148.13 6.4
 -2 -2 1 591.88 15.57
 -2 2 1 614.93 14.82
 -2 2 1 596.61 17.74
 -2 -2 2 654.3 14.01
 -2 -2 2 628.64 17.24
 -2 -2 2 624.15 16.18
 -2 2 2 614.74 16.03
 -2 -2 2 648.6 18.45
 -2 2 2 621.69 18.34
 -2 2 2 653.82 16.3
 -2 2 3 155 8.18
 -2 -2 3 165.04 10.31
 -2 2 3 145.48 8.53
 -2 -2 3 160.88 8.92
 -2 2 3 158.47 8.47
 -2 -2 3 143.83 8.78
 -2 -2 3 148.38 6.11
 -2 2 3 150.18 9.61
 -2 2 4 1512.39 30.39
 -2 -2 4 1527.5 29.59
 -2 -2 4 1621.89 34.98
 -2 2 4 1589.64 27.99
 -2 2 4 1519.76 27.46
 -2 -2 4 1539.12 18.65
 -2 -2 4 1593.98 30.91
 -2 2 4 1581.09 33.39
 -2 -2 5 54.53 6.07
 -2 -2 5 60.97 3.75
 -2 2 5 52.21 5.29
 -2 2 5 55.48 6.67
 -2 -2 5 75.72 8.26
 -2 2 5 68.24 6.3
 -2 -2 5 57.04 6.23
 -2 -2 6 3.81 2.06
 -2 -2 6 6.29 1.35
 -2 -2 6 5.27 2.27
 -2 2 6 4.1 2.26
 -2 2 6 5.77 1.98
 -2 -2 6 2.28 2.26
 -2 2 6 0.81 1.02
 -2 -2 7 6.39 2.56
 -2 -2 7 11.17 4.57
 -2 2 7 15.61 3.46
 -2 2 7 5.87 2.16
 -2 2 7 10.23 3.62
 -2 -2 7 10.03 3.24
 -2 2 8 257.65 14.19
 -2 -2 8 282.64 15.88
 -2 -2 8 277.49 19.68
 -2 2 8 282.34 18.72
 -2 2 8 273.15 15.56
 -2 -2 9 2.63 1.94
 -2 2 9 -0.05 3.25
 -2 2 9 3.03 2.03
 -2 -2 9 1.61 3.86
 -2 2 10 160.84 12.8
 -2 -2 10 163.77 13.37
 -2 2 10 174.53 16.76
 -2 -2 10 165.2 17.02
 -2 -2 11 36.66 6.77
 -2 -2 11 38.62 9.17
 -2 2 11 48.77 9.9
 -2 2 11 38.52 6.63
 -2 -2 11 31.96 4.8
 -2 2 12 174.74 14.74
 -2 -2 12 198.35 15.66
 -2 -2 12 177.22 11.67
 -2 -2 12 204.73 21
 -2 2 12 213.37 21.29
 -2 -2 13 19.4 5.27
 -2 2 13 22.23 7.35
 -2 -2 13 23.5 4.58
 -2 2 13 20.51 5.91
 -2 -2 13 28.87 8.72
 -2 -2 14 5.42 3.52
 -2 2 14 15.26 6.96
 -2 -2 14 22.46 9.27
 -2 -2 15 2.07 5.5
 -2 2 15 3.96 3.11
 -2 2 16 53.8 13.67
 -2 -2 16 29.73 9.54
 -2 2 17 7.7 5.2
 -2 -4 -15 23.43 8.32
 -2 4 -15 33.67 8.86
 -2 -4 -14 32.43 8.82
 -2 4 -14 27.25 7.67
 -2 -4 -13 6.91 5
 -2 4 -13 3.61 3.39
 -2 -4 -12 39.9 9.53
 -2 4 -12 44.97 8.78
 -2 -4 -11 -1.55 3.99
 -2 4 -11 4.71 3.8
 -2 -4 -10 188.72 18.57
 -2 4 -10 165.91 15.36
 -2 -4 -9 9.9 4.93
 -2 4 -9 12.76 4.48
 -2 -4 -8 88.69 12.01
 -2 4 -8 101.14 10.77
 -2 -4 -7 34.14 6.76
 -2 4 -7 33.52 5.93
 -2 -4 -6 853.51 31.84
 -2 4 -6 839.78 27.2
 -2 -4 -5 39.04 2.64
 -2 4 -5 48.31 6.35
 -2 -4 -5 36.03 6.19
 -2 -4 -5 31.95 5.76
 -2 -4 -4 587.61 11.92
 -2 -4 -4 586.6 23.19
 -2 4 -4 605.91 20.7
 -2 -4 -4 565.54 22.57
 -2 -4 -3 11.19 1.89
 -2 -4 -3 5 1.89
 -2 -4 -3 10.48 1.17
 -2 4 -3 12.69 3.12
 -2 4 -3 10.44 3.35
 -2 -4 -3 10.55 2.78
 -2 -4 -2 198.11 8.37
 -2 -4 -2 198.28 13.38
 -2 4 -2 206.56 12.91
 -2 4 -2 204.34 10.92
 -2 -4 -2 184.66 10.95
 -2 -4 -1 17.44 2.7
 -2 -4 -1 20.08 4.32
 -2 4 -1 16.61 3.25
 -2 -4 -1 22.43 3.49
 -2 4 -1 19.23 4.04
 -2 -4 0 387.83 17.19
 -2 -4 0 382.53 13.44
 -2 4 0 371.18 16.52
 -2 -4 0 389.19 11.71
 -2 -4 1 0.57 1.37
 -2 -4 1 -0.86 1.15
 -2 4 1 -0.52 1.06
 -2 -4 1 0.69 0.65
 -2 4 1 -0.12 1.09
 -2 4 2 14.19 3.6
 -2 -4 2 15.23 3.19
 -2 -4 2 24.63 4.49
 -2 -4 2 12.13 2.75
 -2 -4 2 15.94 2.79
 -2 4 2 14.56 2.82
 -2 4 2 15.92 3.53
 -2 4 3 0.59 1.35
 -2 -4 3 8.03 2.78
 -2 -4 3 3.97 2.06
 -2 -4 3 7.55 2.41
 -2 -4 3 5.04 1.81
 -2 4 3 4.55 1.53
 -2 4 3 9.3 2.44
 -2 4 3 8.26 2.71
 -2 4 4 1386.98 35.11
 -2 -4 4 1384.31 31.2
 -2 -4 4 1336.58 29.04
 -2 4 4 1316.88 26.76
 -2 -4 4 1365.02 29.23
 -2 -4 4 1431.86 34.12
 -2 -4 4 1363.14 18.72
 -2 4 4 1409.88 35.83
 -2 -4 5 371.64 16.37
 -2 -4 5 385.55 19.12
 -2 4 5 341.78 15.22
 -2 4 5 360.37 14.19
 -2 4 5 372.05 18.65
 -2 -4 5 376.37 15.19
 -2 -4 5 385.43 17.41
 -2 4 5 378.52 19.65
 -2 -4 6 17.5 4.46
 -2 4 6 12.19 3.37
 -2 -4 6 9.93 2.92
 -2 4 6 12.86 3
 -2 -4 6 15.31 3.26
 -2 4 6 10.96 4.08
 -2 -4 6 13.52 3.43
 -2 4 6 16.52 4.67
 -2 4 7 90.43 8.2
 -2 -4 7 97.47 11.26
 -2 4 7 109.66 10.41
 -2 -4 7 97.07 7.8
 -2 -4 7 87.83 9.04
 -2 4 7 83.57 9.35
 -2 4 8 361.7 17.51
 -2 -4 8 402.07 23.99
 -2 4 8 375.18 20.6
 -2 -4 8 328.52 14.92
 -2 -4 8 353.85 19.33
 -2 4 8 342.85 19.87
 -2 -4 8 359.16 16.74
 -2 4 9 6.8 4.53
 -2 4 9 1.57 2.82
 -2 -4 9 6.1 4.2
 -2 -4 9 -1.87 2.47
 -2 -4 9 0.15 0.98
 -2 -4 9 5 2.19
 -2 -4 10 286.05 22.83
 -2 4 10 303.96 21.5
 -2 -4 10 268.83 14.5
 -2 -4 10 286.61 18.7
 -2 4 10 261.04 18.53
 -2 -4 10 262.68 17.38
 -2 -4 11 32.33 8.6
 -2 4 11 32.76 8.06
 -2 4 11 23.4 5.62
 -2 -4 11 13.34 4.76
 -2 -4 11 15.75 3.92
 -2 -4 11 27.64 6.59
 -2 -4 12 51.11 8.93
 -2 -4 12 56.05 11.45
 -2 4 12 64.2 11.26
 -2 4 12 45.35 8.69
 -2 -4 13 1.79 3.12
 -2 -4 13 6.67 5.7
 -2 4 13 3.44 2.99
 -2 4 13 4.18 3.67
 -2 -4 14 82.59 11.87
 -2 -4 14 75.72 14.42
 -2 4 14 55.94 11.41
 -2 -4 15 1.77 2.91
 -2 -4 15 14.75 7.49
 -2 4 15 7.65 5.6
 -2 4 16 13.42 6.49
 -2 -4 16 14.29 6.78
 -2 4 17 13.03 8.32
 -2 6 -15 9.84 5.28
 -2 -6 -14 92.66 16.26
 -2 6 -14 73.5 12.11
 -2 -6 -13 -0.71 3.58
 -2 6 -13 10.95 5.17
 -2 -6 -12 31.35 8.73
 -2 6 -12 40.53 8.34
 -2 -6 -11 2.81 3.76
 -2 6 -11 6.93 3.88
 -2 6 -10 3.66 3.22
 -2 -6 -10 9.68 5.34
 -2 6 -9 19.53 4.82
 -2 -6 -9 18.6 6.14
 -2 6 -8 1.08 1.73
 -2 -6 -8 17.98 6.33
 -2 -6 -7 33.2 2.95
 -2 -6 -7 35.99 7.61
 -2 6 -7 28.69 5.73
 -2 -6 -7 35.23 4.34
 -2 -6 -6 172.56 7.62
 -2 -6 -6 180.07 8.62
 -2 6 -6 165.34 12.4
 -2 -6 -5 40.44 4.03
 -2 6 -5 43.24 6.3
 -2 -6 -5 36.43 3.43
 -2 -6 -4 535.47 15.47
 -2 6 -4 519.9 23.78
 -2 6 -4 503.78 19.96
 -2 -6 -4 547.11 24.36
 -2 -6 -3 36.07 4.32
 -2 -6 -3 41.18 7.26
 -2 6 -3 34.82 5.25
 -2 -6 -3 35.28 5.95
 -2 6 -3 25.75 5.26
 -2 -6 -2 600.58 18.22
 -2 -6 -2 603.66 27.3
 -2 6 -2 649.83 21.15
 -2 6 -2 621.88 24.98
 -2 -6 -2 612.01 22.39
 -2 -6 -1 12.85 4.13
 -2 -6 -1 10.97 2.85
 -2 -6 -1 9.53 2.49
 -2 6 -1 15.19 4.08
 -2 -6 0 459.31 23.32
 -2 -6 0 508.69 18.07
 -2 6 0 490.43 21.91
 -2 -6 0 476.98 15.93
 -2 6 1 80.4 9.77
 -2 -6 1 67.97 6.85
 -2 -6 1 89.71 10.32
 -2 6 1 80.39 8.96
 -2 6 1 77.47 7.12
 -2 -6 1 82.32 5.67
 -2 6 2 668.98 28.02
 -2 -6 2 660.93 22.45
 -2 -6 2 678.74 27.28
 -2 -6 2 693.47 21.35
 -2 -6 2 656.33 18.04
 -2 -6 2 663.96 12.16
 -2 6 2 701.89 26.45
 -2 6 2 681.55 21.4
 -2 -6 2 655.56 11.93
 -2 6 3 131.58 12.88
 -2 -6 3 125.08 11.67
 -2 -6 3 127.57 10.17
 -2 -6 3 135.14 8.95
 -2 -6 3 149.19 10.72
 -2 6 3 143.61 12.51
 -2 -6 3 138.08 5.46
 -2 6 3 138.78 9.84
 -2 -6 3 129.75 6.34
 -2 6 4 1690.25 46.15
 -2 -6 4 1737.54 38.98
 -2 -6 4 1684.45 42.19
 -2 -6 4 1647.97 33.72
 -2 6 4 1695.49 27.55
 -2 -6 4 1730.36 39.09
 -2 6 4 1694.67 44.11
 -2 -6 4 1713.97 22.27
 -2 -6 4 1660.81 24.24
 -2 -6 5 16.79 4.21
 -2 6 5 18.18 5.08
 -2 -6 5 24.36 5.08
 -2 6 5 19.56 3.51
 -2 -6 5 18.12 3.97
 -2 -6 5 21.52 4.66
 -2 -6 5 17.64 2.7
 -2 -6 5 21.49 3.21
 -2 6 5 18.15 5.04
 -2 6 6 314.35 20.43
 -2 -6 6 323.99 18.01
 -2 -6 6 323.77 18.04
 -2 6 6 298.06 13.29
 -2 -6 6 336.15 17.39
 -2 -6 6 340.52 20.04
 -2 6 6 305.39 15.01
 -2 -6 6 335.54 13.75
 -2 -6 6 323.92 13.31
 -2 6 6 323.5 20.68
 -2 -6 7 3.8 3.44
 -2 6 7 5.36 2.73
 -2 6 7 2.82 1.46
 -2 -6 7 0.62 2.13
 -2 6 7 8.28 4.01
 -2 -6 7 8.83 3.78
 -2 6 7 8.41 3.87
 -2 -6 7 1.87 1.5
 -2 -6 8 177.67 13.61
 -2 6 8 175.16 16.22
 -2 -6 8 180.94 14.7
 -2 6 8 181.9 13.99
 -2 6 8 156.39 11.23
 -2 -6 8 186.06 17.07
 -2 -6 8 151.93 11.6
 -2 -6 8 156.92 9.45
 -2 6 8 187.44 17.18
 -2 -6 9 6.05 4.22
 -2 6 9 2.28 3.21
 -2 6 9 7.07 3.82
 -2 6 9 2.77 2.13
 -2 -6 9 2.76 2.14
 -2 -6 9 1.51 2.46
 -2 -6 9 1.9 1.92
 -2 -6 9 1.6 1.94
 -2 -6 10 21.68 6.96
 -2 6 10 19.37 6.1
 -2 6 10 10.61 4.88
 -2 -6 10 15.01 4.31
 -2 -6 10 8.19 3.48
 -2 -6 10 19.63 4.33
 -2 -6 10 20.47 5.53
 -2 6 11 -1.69 2.63
 -2 -6 11 0.99 3.38
 -2 6 11 0.76 2.2
 -2 -6 11 5.58 3.52
 -2 -6 11 0.81 1.45
 -2 -6 12 0.01 2.26
 -2 -6 12 0.69 3.41
 -2 6 12 2.68 2.75
 -2 6 12 4.15 4.04
 -2 -6 13 11.02 5.43
 -2 6 13 -1.02 3.02
 -2 6 13 10.03 4.98
 -2 -6 13 13.02 6.94
 -2 -6 14 41.59 8.88
 -2 -6 14 43.89 11.27
 -2 6 14 40.84 9.81
 -2 6 14 51.28 10.54
 -2 -6 15 5.38 3.78
 -2 6 15 3.57 5.43
 -2 -6 15 3.59 4.88
 -2 6 16 21.05 8.8
 -2 6 17 2.97 4.91
 -2 8 -15 0.93 3.72
 -2 8 -14 11.42 5.39
 -2 8 -13 -0.53 2.29
 -2 -8 -13 9.73 5.97
 -2 8 -12 29.76 7.34
 -2 -8 -12 45.9 12.06
 -2 -8 -11 5.89 4.38
 -2 8 -11 10.32 4.57
 -2 -8 -10 98.07 15.27
 -2 -8 -10 84.68 7.95
 -2 8 -10 101.55 11.85
 -2 -8 -9 4.43 3.92
 -2 8 -9 5.63 3.08
 -2 -8 -9 4.18 2.12
 -2 -8 -8 135.02 7.67
 -2 8 -8 139.3 12.95
 -2 -8 -8 124.87 15.37
 -2 -8 -8 132.76 8.71
 -2 -8 -7 4.5 1.95
 -2 -8 -7 2.81 1.42
 -2 8 -7 1.18 2.43
 -2 -8 -6 113.98 8.14
 -2 8 -6 121.9 11.19
 -2 -8 -5 24.52 4.05
 -2 8 -5 21.11 4.68
 -2 8 -5 17.9 5
 -2 -8 -4 137.41 9.6
 -2 8 -4 125.05 10.7
 -2 8 -4 134.81 13.19
 -2 -8 -3 21.58 4.2
 -2 -8 -3 16.77 4.63
 -2 8 -3 19.44 5.06
 -2 -8 -2 125.94 9.98
 -2 -8 -2 145.01 12.56
 -2 -8 -1 16.3 3.79
 -2 -8 -1 11.87 3.69
 -2 8 -1 11.06 3.74
 -2 -8 0 57 7.14
 -2 8 0 75.1 9.84
 -2 -8 0 64.09 7
 -2 8 1 172.64 16.28
 -2 -8 1 159.46 11.96
 -2 -8 1 178.12 16.86
 -2 8 1 173.17 14.75
 -2 -8 1 166.73 9.93
 -2 8 2 182.92 17.2
 -2 -8 2 190.56 17.18
 -2 -8 2 196.92 13.61
 -2 -8 2 171.48 11.15
 -2 -8 2 185.26 10.02
 -2 -8 2 189.56 8.51
 -2 8 2 188.58 12.42
 -2 8 2 190.42 15.55
 -2 -8 2 187.37 9.02
 -2 -8 3 81.93 9.13
 -2 8 3 84.27 11.6
 -2 -8 3 84.5 8.45
 -2 -8 3 75.29 6.96
 -2 -8 3 76.06 11.16
 -2 8 3 72.93 7.82
 -2 -8 3 77 5.23
 -2 8 3 78.84 10.23
 -2 -8 3 79.2 4.47
 -2 -8 3 82.53 6.62
 -2 8 4 128.29 14.66
 -2 -8 4 140.49 12.35
 -2 -8 4 151.49 14.94
 -2 -8 4 125.61 9.7
 -2 -8 4 148.01 11.82
 -2 8 4 136.44 10.98
 -2 -8 4 131.82 8.24
 -2 8 4 137.64 13.93
 -2 -8 4 137.08 7.25
 -2 8 5 2.55 2.67
 -2 -8 5 1.22 2.03
 -2 8 5 2.41 1.36
 -2 -8 5 -1.21 2.57
 -2 -8 5 -2.22 2.78
 -2 -8 5 2.06 1.9
 -2 -8 5 1.7 1
 -2 -8 5 1.81 1.21
 -2 8 5 6.18 3.53
 -2 8 6 390.18 26.31
 -2 -8 6 377.35 23.43
 -2 -8 6 376.06 21.48
 -2 8 6 378.15 15.12
 -2 -8 6 383.18 21.66
 -2 -8 6 376.23 15.88
 -2 -8 6 355.75 14.54
 -2 8 6 384.19 24.33
 -2 8 7 0.66 3.68
 -2 -8 7 5.04 3.38
 -2 -8 7 2.98 3.32
 -2 -8 7 3.2 2.82
 -2 8 7 0.41 1.05
 -2 -8 7 1.13 1.33
 -2 8 7 6.32 5.2
 -2 -8 7 0.77 1.4
 -2 8 8 187.8 19.15
 -2 -8 8 180.44 16.02
 -2 -8 8 185.81 16.2
 -2 8 8 179.01 11.51
 -2 -8 8 226.28 19.68
 -2 8 8 189.26 13.43
 -2 -8 8 171.92 12.21
 -2 -8 8 188.21 12.81
 -2 8 8 201.43 19.48
 -2 -8 9 31.94 7.7
 -2 8 9 18.27 4.01
 -2 8 9 15.68 4.42
 -2 8 9 14.44 5.86
 -2 -8 9 11.31 4.6
 -2 -8 9 11.62 5
 -2 8 9 20.18 6.81
 -2 -8 9 18.92 4.57
 -2 8 10 101.98 11.43
 -2 -8 10 106.69 14.72
 -2 -8 10 114.99 13.57
 -2 8 10 112.37 15.41
 -2 8 10 104.23 14.84
 -2 8 11 20.22 5.89
 -2 -8 11 14.38 5.89
 -2 8 11 15.57 5.81
 -2 -8 11 21.68 6.33
 -2 8 11 18.52 7.67
 -2 -8 12 162.96 19.86
 -2 8 12 133.05 15.03
 -2 8 12 142.17 18.1
 -2 -8 12 135.02 15.79
 -2 8 12 128.74 18.2
 -2 -8 13 5.71 5.08
 -2 8 13 22.36 6.85
 -2 8 13 26.04 7.98
 -2 -8 13 27.38 7.4
 -2 8 13 27.56 9.49
 -2 -8 14 30.78 9.86
 -2 8 14 34.46 9.02
 -2 -8 14 16.91 5.74
 -2 8 14 7.36 4.61
 -2 8 14 36.83 11.01
 -2 -8 15 15.32 8.6
 -2 8 15 7.7 5.26
 -2 -8 15 16.59 6.49
 -2 8 15 10.39 6.13
 -2 10 -14 13.94 5.02
 -2 -10 -13 1.76 5.78
 -2 10 -13 -1.69 2.92
 -2 -10 -12 41.52 11.37
 -2 10 -12 25.77 7.39
 -2 -10 -11 3.25 4.12
 -2 10 -11 1.21 2.49
 -2 -10 -10 89.87 14.96
 -2 10 -10 88.94 11.64
 -2 -10 -9 -0.67 2.59
 -2 10 -9 6.68 4.07
 -2 -10 -8 39.87 5.26
 -2 10 -8 35.16 7.08
 -2 -10 -7 8.43 2.83
 -2 10 -7 9.33 3.78
 -2 -10 -6 74.76 8.08
 -2 10 -6 55.42 7.96
 -2 -10 -5 311.29 16.35
 -2 10 -5 315.2 18.49
 -2 10 -5 310.36 22.18
 -2 -10 -4 136.93 11.09
 -2 10 -4 129.77 14.28
 -2 -10 -3 5.86 2.61
 -2 10 -3 3.91 3.5
 -2 -10 -2 100.21 9.97
 -2 10 -2 108.47 12.77
 -2 -10 -2 117.69 12.29
 -2 -10 -1 2.68 2.17
 -2 -10 -1 10.75 3.76
 -2 10 -1 3.47 2.51
 -2 -10 0 98.14 10.38
 -2 10 0 104.53 12.58
 -2 -10 0 86.8 9.25
 -2 10 1 -0.79 3.24
 -2 -10 1 -0.79 1.77
 -2 10 1 -3.22 2.89
 -2 -10 1 3.21 2.49
 -2 10 2 151.11 17.49
 -2 -10 2 160.88 13.67
 -2 -10 2 161.96 9.78
 -2 -10 2 155.35 9.14
 -2 10 2 161.93 15.84
 -2 -10 2 156.93 9.96
 -2 10 3 25.43 7.34
 -2 -10 3 14.43 4.85
 -2 -10 3 24.79 4.9
 -2 -10 3 19.38 3.88
 -2 -10 3 23.07 3.41
 -2 10 3 22.25 6.57
 -2 -10 3 21.17 3.2
 -2 10 4 172.67 19.13
 -2 -10 4 208.56 16.41
 -2 -10 4 213.25 13.16
 -2 -10 4 218 14.88
 -2 10 4 254.98 20.68
 -2 -10 4 219.21 10.6
 -2 -10 4 219.73 7.4
 -2 -10 4 222.27 12.6
 -2 -10 5 83.52 10.83
 -2 10 5 69.76 12.13
 -2 -10 5 74.63 9.65
 -2 -10 5 66.94 7.01
 -2 -10 5 70.62 6.38
 -2 10 5 62.45 10.53
 -2 10 6 284.71 25.19
 -2 -10 6 276.67 20.09
 -2 -10 6 264.61 14.28
 -2 10 6 262.13 22.2
 -2 -10 6 251.15 12.88
 -2 -10 6 272.08 18.86
 -2 10 7 161.78 19.29
 -2 -10 7 147.23 15.29
 -2 10 7 122.34 8.65
 -2 -10 7 165.68 15.76
 -2 -10 7 131.21 10.58
 -2 10 7 157.17 17.6
 -2 -10 7 130.26 10.07
 -2 -10 8 96.29 12.62
 -2 10 8 95.83 8.65
 -2 10 8 97.54 15.2
 -2 -10 8 115.13 13.91
 -2 10 8 108.25 15.01
 -2 -10 9 -2.95 2.33
 -2 10 9 2.95 2.32
 -2 -10 9 1.18 3.53
 -2 10 9 -0.98 2.19
 -2 10 9 7.79 4.62
 -2 -10 10 107.82 14.88
 -2 10 10 77.27 9.38
 -2 10 10 56.43 12.82
 -2 -10 10 72.07 11.89
 -2 10 10 74.87 13.73
 -2 10 11 -1.19 3.12
 -2 -10 11 3.69 2.89
 -2 10 11 0.63 3.51
 -2 -10 11 2.26 3.85
 -2 10 11 4.45 4.44
 -2 -10 12 143.3 18.79
 -2 10 12 119.14 18.03
 -2 -10 12 103.26 14.96
 -2 10 12 114.3 17.89
 -2 -10 13 1.68 3.1
 -2 10 13 0.81 2.5
 -2 -10 13 3.35 4.33
 -2 10 13 -1.19 4.78
 -2 -10 14 6.75 4.57
 -2 10 14 9.13 6.7
 -2 -10 14 4.04 3.49
 -2 -10 15 -2.87 4.72
 -2 12 -12 18.96 5.79
 -2 -12 -11 6.19 5.71
 -2 12 -11 5.23 3.76
 -2 -12 -10 50.86 12.12
 -2 12 -10 53.22 9.46
 -2 12 -9 10.93 5.02
 -2 12 -8 34.88 7.21
 -2 -12 -7 58.47 7.69
 -2 -12 -6 222.15 15.38
 -2 12 -6 207.32 19.7
 -2 -12 -5 58.09 8.26
 -2 12 -5 37.17 8.51
 -2 -12 -4 213.65 15.53
 -2 12 -4 243.8 21.06
 -2 -12 -3 8.83 3.62
 -2 12 -3 10.22 4.94
 -2 -12 -2 121.5 12.6
 -2 12 -2 148.31 16.05
 -2 -12 -1 5.01 2.8
 -2 12 -1 10.97 5.25
 -2 -12 0 394.29 22.65
 -2 12 0 372.91 25.77
 -2 -12 0 374.91 21.03
 -2 12 1 -3.68 3.21
 -2 -12 1 1.5 1.59
 -2 12 1 -0.46 2.48
 -2 -12 1 0.3 1.32
 -2 12 2 265.64 25.2
 -2 -12 2 221.39 17.8
 -2 -12 2 232.81 11.77
 -2 -12 2 229.52 12.81
 -2 12 2 271.93 22.48
 -2 -12 2 259.45 14.6
 -2 12 3 26.46 8.54
 -2 -12 3 23.59 6.07
 -2 -12 3 23.29 4.26
 -2 -12 3 23.94 3.99
 -2 -12 3 26.37 4.21
 -2 12 3 27.21 7.72
 -2 -12 4 107.87 12.82
 -2 12 4 95.35 15.36
 -2 -12 4 112.17 11.05
 -2 -12 4 117.55 10.23
 -2 -12 4 115.51 8.82
 -2 12 4 113.04 15.03
 -2 -12 5 1.86 2.67
 -2 -12 5 1.44 2.39
 -2 12 5 1.16 4.77
 -2 12 5 10.3 5.44
 -2 -12 6 30.44 6.51
 -2 -12 6 9.1 4.3
 -2 12 6 15.24 7.38
 -2 12 6 25.56 7.43
 -2 -12 7 4.85 3.9
 -2 12 7 7.78 5.17
 -2 -12 7 5.15 3.32
 -2 12 7 16.08 6.58
 -2 -12 8 26.34 7.17
 -2 12 8 10.09 5.37
 -2 -12 8 21.54 7.01
 -2 12 8 32.27 8.52
 -2 -12 9 -4.78 4.19
 -2 12 9 -0.86 4.74
 -2 -12 9 6.22 5.33
 -2 12 9 -1 3.71
 -2 -12 10 63.54 12.15
 -2 -12 10 72.6 13.02
 -2 12 10 50.45 12.61
 -2 12 10 49.18 11.49
 -2 -12 11 0.77 2.91
 -2 -12 11 5.26 4.08
 -2 12 11 6.45 6.1
 -2 12 11 9.23 6.59
 -2 -12 12 13.24 6.67
 -2 -12 12 28.48 9.01
 -2 12 12 8.99 7.49
 -2 12 12 5.13 5.03
 -2 -12 13 5.43 4.93
 -2 12 13 -1.15 3.17
 -2 -12 13 -4.27 4.41
 -2 -12 14 8.38 5.35
 -2 -14 -10 45.17 11.75
 -2 -14 -6 54.37 8.56
 -2 14 -6 57.89 11.29
 -2 -14 -5 0.95 2.51
 -2 14 -5 8.75 5.41
 -2 -14 -4 64.06 9.61
 -2 14 -4 80.61 12.95
 -2 -14 -3 -0.12 1.91
 -2 14 -3 -3.47 3.84
 -2 -14 -2 74.09 10.62
 -2 14 -2 48.66 10.53
 -2 -14 -1 16.2 5.1
 -2 14 -1 1.45 2.69
 -2 -14 0 27.34 6.69
 -2 14 0 20.89 6.77
 -2 -14 1 42.33 8.51
 -2 14 1 37.28 10.38
 -2 14 1 33.61 8.85
 -2 14 2 25.91 9.32
 -2 -14 2 16.07 5.28
 -2 14 2 16.82 6.44
 -2 14 3 11.02 7.14
 -2 -14 3 3.76 2.89
 -2 14 3 5.7 4.34
 -2 14 4 169.25 22.61
 -2 -14 4 174.78 17.7
 -2 14 4 141.21 18.16
 -2 -14 5 2.36 3.12
 -2 14 5 6.34 6.28
 -2 14 5 4.52 5.19
 -2 -14 6 21.97 5.92
 -2 -14 6 15.41 5.26
 -2 14 6 15.99 6.47
 -2 -14 7 12.52 5.42
 -2 14 7 3.18 3.73
 -2 -14 7 1.06 3.33
 -2 14 7 2.91 4.26
 -2 -14 8 61.89 10.71
 -2 -14 8 70.16 12.36
 -2 14 8 69.77 15.43
 -2 14 8 41.14 10.58
 -2 -14 9 3.93 3.88
 -2 -14 9 5.96 4.35
 -2 14 9 2.55 4.55
 -2 14 9 -1.05 2.84
 -2 -14 10 65.68 12.29
 -2 -14 10 47.25 11.09
 -2 14 10 50.44 13.67
 -2 14 10 52.25 13.02
 -2 -14 11 12.59 7.18
 -2 14 11 -6.34 7.14
 -2 -14 11 4.87 5.29
 -2 -14 12 65.19 13.73
 -2 14 12 60.3 15.45
 -2 -14 13 -2.43 6.89
 -2 -16 -6 41.22 8.11
 -2 16 -6 46.03 10.4
 -2 -16 -5 3.98 3.64
 -2 16 -5 7.83 5.19
 -2 -16 -4 57.54 9.94
 -2 16 -4 34.62 9.16
 -2 -16 -3 -0.31 2.59
 -2 16 -3 -1.74 2.29
 -2 -16 -2 32.23 7.7
 -2 16 -2 50.06 10.92
 -2 -16 -1 -5.07 3.95
 -2 16 -1 3.06 3.55
 -2 -16 0 32.1 7.71
 -2 16 0 20.74 7.8
 -2 -16 1 7 4.75
 -2 16 1 4.14 4.39
 -2 16 2 59.94 14.34
 -2 -16 2 48.77 10.03
 -2 16 2 41.22 10.2
 -2 16 3 4.79 5.11
 -2 -16 3 10.34 4.49
 -2 16 3 11.97 5.96
 -2 16 4 50.22 13.35
 -2 -16 4 38.5 9.14
 -2 16 4 26.69 9.39
 -2 16 5 6.7 5.82
 -2 -16 5 -0.91 2.64
 -2 16 5 13.57 6.42
 -2 16 6 20.96 9.51
 -2 -16 6 32.2 8.89
 -2 16 6 32.55 10.16
 -2 -16 7 6.71 3.78
 -2 16 7 6.22 6.28
 -2 16 7 4.16 4.68
 -2 16 8 17.77 9.58
 -2 16 8 44.32 11.91
 -2 -18 -4 28.4 7.58
 -2 -18 -3 3.07 3.35
 -2 -18 -2 35.38 9.16
 -2 18 -2 29.97 9.32
 -2 -18 -1 3.47 3.58
 -2 18 -1 -0.22 2.66
 -2 -18 0 25.8 7.68
 -2 18 0 19.72 7.81
 -2 -18 1 0.56 2.71
 -2 18 1 4.97 4.84
 -2 18 2 48.81 12.48
 -2 18 3 1.69 4.25
 -2 18 4 44.97 12.33
 -2 18 5 -0.73 3.55
 -1 -1 -16 17.23 8.12
 -1 1 -16 2.21 2.45
 -1 1 -15 32.06 8.84
 -1 -1 -15 27.19 8.25
 -1 1 -14 5 4.56
 -1 -1 -14 2.57 2.62
 -1 1 -13 3.6 3.69
 -1 -1 -13 10.19 5.05
 -1 -1 -12 50.7 10.34
 -1 1 -12 43.12 8.8
 -1 -1 -11 625.52 32.6
 -1 1 -11 575.64 30.04
 -1 1 -10 22.82 5.96
 -1 -1 -10 29.37 6.82
 -1 -1 -9 219.28 17.51
 -1 1 -9 212.66 16.38
 -1 -1 -8 16.19 4.45
 -1 1 -8 13.71 4.46
 -1 -1 -7 201.02 14.89
 -1 1 -7 173.78 13.13
 -1 1 -7 226.09 13.88
 -1 -1 -7 210.17 14.4
 -1 1 -6 2.64 1.61
 -1 -1 -6 1.32 1.85
 -1 1 -6 0.89 1.86
 -1 -1 -6 1.28 2.4
 -1 1 -5 29.2 4.29
 -1 -1 -5 31.35 5.04
 -1 1 -5 36.24 5.17
 -1 -1 -5 28.22 4.58
 -1 -1 -4 138.2 9.75
 -1 1 -4 132.1 8.71
 -1 -1 -4 158.1 9.79
 -1 1 -4 154.27 8.66
 -1 -1 -3 1306.5 26.11
 -1 1 -3 1335.11 24.28
 -1 -1 -3 1319.03 25.37
 -1 1 -3 1327.72 22.53
 -1 -1 -2 70.96 5.29
 -1 1 -2 81.28 5.29
 -1 -1 -2 80.42 5.33
 -1 1 -2 90.32 5.18
 -1 -1 2 372.25 10.12
 -1 1 2 356 9.27
 -1 -1 2 382.36 11.85
 -1 1 2 379.94 10.64
 -1 1 2 372.75 9.6
 -1 -1 2 371.12 10.39
 -1 1 3 259.39 9.01
 -1 -1 3 264.14 9.71
 -1 -1 3 280.41 11.73
 -1 1 3 260.09 10.53
 -1 -1 3 266.21 9.61
 -1 1 3 257.01 8.74
 -1 -1 3 253.47 8.83
 -1 1 4 6.38 2.78
 -1 -1 4 10.03 3.26
 -1 -1 4 1.95 1.13
 -1 1 4 1.31 1.1
 -1 1 4 0.38 0.7
 -1 -1 4 1.63 0.87
 -1 -1 4 2.2 1.24
 -1 -1 5 611.03 18.39
 -1 1 5 644.15 18.21
 -1 -1 5 607.76 17.1
 -1 1 5 598.36 16.74
 -1 -1 5 574.89 19.02
 -1 1 5 582.84 21.42
 -1 -1 6 646.04 20.94
 -1 1 6 655.82 19.98
 -1 -1 6 643.21 18.78
 -1 1 6 649.07 18.75
 -1 1 6 628.6 24.49
 -1 -1 6 659.44 22.91
 -1 1 7 436.23 17.72
 -1 -1 7 416.48 18.07
 -1 1 7 393.14 16.01
 -1 -1 7 385 15.44
 -1 1 7 410.13 21.13
 -1 -1 7 421.21 19.83
 -1 1 8 3.75 2.04
 -1 1 8 5.89 2.35
 -1 -1 8 3.66 1.95
 -1 1 8 3.88 2.83
 -1 -1 8 3.1 2.29
 -1 1 9 15.2 3.76
 -1 -1 9 21 4.17
 -1 1 9 10.46 4.06
 -1 -1 9 20.01 5.43
 -1 1 10 9.19 3.22
 -1 -1 10 5.97 2.69
 -1 1 10 3.46 3.89
 -1 -1 10 3.49 2.62
 -1 1 11 371.65 20.33
 -1 -1 11 357.31 18.23
 -1 1 11 371.62 26.23
 -1 -1 11 351 23.98
 -1 1 12 -0.49 2.28
 -1 -1 12 3.31 2.42
 -1 -1 12 2.22 2.37
 -1 1 12 -2.56 2.86
 -1 -1 12 0.36 3.05
 -1 -1 13 78.39 9.5
 -1 1 13 62.35 9.27
 -1 -1 13 78.86 13.77
 -1 1 13 80.03 13.09
 -1 1 13 76.85 13.32
 -1 -1 13 49.1 10.43
 -1 -1 14 20.53 8.52
 -1 1 14 1.63 2.16
 -1 1 14 16.93 8.11
 -1 1 14 -4.27 4.65
 -1 -1 14 2 4.28
 -1 -1 15 51.47 12.24
 -1 1 15 41.45 11.32
 -1 -1 15 29.07 8.86
 -1 -1 16 6.07 5.58
 -1 1 16 12.35 7.72
 -1 3 -16 3.34 3.22
 -1 -3 -15 27.73 9.11
 -1 3 -15 19.44 6.35
 -1 -3 -14 4.38 4.79
 -1 3 -14 9.06 5.1
 -1 -3 -13 33.69 9.11
 -1 3 -13 40.54 8.7
 -1 -3 -12 10.56 4.99
 -1 3 -12 1.5 2.52
 -1 -3 -11 74.82 11.82
 -1 3 -11 103.89 12.41
 -1 -3 -10 8.32 4.95
 -1 3 -10 3.7 3.05
 -1 -3 -9 193.35 17.28
 -1 3 -9 231.91 16.39
 -1 3 -8 2.07 1.57
 -1 -3 -8 2.86 3.12
 -1 3 -8 1.15 1.87
 -1 3 -7 261.34 15.23
 -1 -3 -7 249.64 17.51
 -1 3 -7 270.62 14.12
 -1 3 -6 0.8 1.18
 -1 -3 -6 -0.78 1.67
 -1 3 -6 -2.01 2
 -1 -3 -6 2.14 1.91
 -1 3 -5 210.96 11.6
 -1 -3 -5 214.71 13.94
 -1 3 -5 226.36 10.99
 -1 3 -4 199.91 10.5
 -1 -3 -4 217.7 13.11
 -1 -3 -3 1684.43 34.76
 -1 3 -3 1560.05 26.78
 -1 -3 -3 1598.03 32.13
 -1 -3 -2 451.92 17.17
 -1 -3 -2 452.35 9.66
 -1 -3 -2 464.67 7.95
 -1 3 -2 429.64 15.08
 -1 3 -2 474.71 13.73
 -1 -3 -2 463.97 15.69
 -1 -3 -1 752.02 13.69
 -1 -3 -1 769.92 21.55
 -1 3 -1 771.94 16.2
 -1 3 -1 708.63 18.71
 -1 -3 -1 737.07 17.16
 -1 3 0 148.05 9.18
 -1 -3 0 161.53 6.93
 -1 -3 0 156.44 9.61
 -1 3 0 148.36 8.45
 -1 -3 0 155.68 6.52
 -1 3 1 724.76 20.57
 -1 -3 1 706.2 19.49
 -1 -3 1 693.92 15.48
 -1 -3 1 702.35 12.89
 -1 -3 1 725.43 15.13
 -1 3 1 701.64 18.6
 -1 3 1 710.32 15.02
 -1 -3 1 690.56 11.24
 -1 3 2 3.52 1.78
 -1 -3 2 -1.55 1.5
 -1 -3 2 1.79 1.01
 -1 -3 2 1.5 0.97
 -1 3 2 2.63 1.01
 -1 -3 2 2.29 1.46
 -1 3 2 0.05 0.6
 -1 -3 2 0.66 0.43
 -1 3 2 0.24 0.87
 -1 -3 2 0.97 0.52
 -1 -3 3 356.02 12.99
 -1 3 3 341.29 14.85
 -1 -3 3 370.95 13.11
 -1 -3 3 348.01 14.18
 -1 3 3 354.93 10.16
 -1 -3 3 350.69 11.9
 -1 3 3 349.89 11.2
 -1 -3 3 359.74 10.07
 -1 -3 3 340.19 9.5
 -1 3 3 377.15 15.71
 -1 -3 4 86.1 6.46
 -1 3 4 83.18 7.87
 -1 -3 4 78.55 6.58
 -1 -3 4 78.44 6.43
 -1 3 4 91.06 6.81
 -1 3 4 80.82 5.48
 -1 -3 4 88.74 8.14
 -1 -3 4 84.09 5.8
 -1 -3 4 75.35 4.76
 -1 -3 5 1583.33 28.68
 -1 -3 5 1629.03 31.02
 -1 3 5 1534.47 34.9
 -1 -3 5 1510.91 30.36
 -1 3 5 1658.55 27.45
 -1 -3 5 1568.27 35.59
 -1 -3 5 1455.32 28.1
 -1 -3 5 1520.07 26.43
 -1 3 6 124.96 8.38
 -1 -3 6 137.81 9.61
 -1 3 6 121.46 10.33
 -1 -3 6 132.89 9.05
 -1 3 7 1289.97 29.55
 -1 3 7 1257.92 34.92
 -1 -3 7 1282.45 30.96
 -1 -3 7 1226.42 31.35
 -1 3 8 23.37 5.64
 -1 3 8 20.47 4.06
 -1 -3 8 15.61 3.6
 -1 3 8 13.07 4.3
 -1 -3 8 16.89 4.26
 -1 3 9 30.16 6.35
 -1 -3 9 32.8 5.65
 -1 3 9 32.84 7.58
 -1 -3 9 37.74 6.48
 -1 3 10 1.75 2.24
 -1 -3 10 7.17 2.89
 -1 3 10 7.55 4.81
 -1 -3 10 2.28 2.18
 -1 -3 11 218.61 19.78
 -1 3 11 167.64 15.84
 -1 -3 11 181.3 14.14
 -1 -3 11 174.4 16.35
 -1 3 11 152.17 17.41
 -1 -3 12 6.8 5.36
 -1 3 12 12.28 5.02
 -1 -3 12 3.31 2.91
 -1 -3 12 0.43 2.32
 -1 -3 13 72.12 13.46
 -1 3 13 59.94 10.2
 -1 3 13 77.14 12.84
 -1 -3 13 76.53 9.94
 -1 -3 13 61.2 11.17
 -1 3 14 16.86 7.96
 -1 -3 14 13.95 7.07
 -1 3 14 15.7 6.15
 -1 -3 14 21.67 5.71
 -1 -3 14 15.79 6.31
 -1 3 15 57.19 12.35
 -1 -3 15 49.42 11.79
 -1 -3 15 36.62 9.61
 -1 3 16 27.83 9.3
 -1 -3 16 43.05 11.65
 -1 -3 16 21.22 7.35
 -1 3 17 -0.45 3.33
 -1 5 -16 -3.85 3.06
 -1 -5 -15 11.2 6.45
 -1 5 -15 7.03 4.15
 -1 -5 -14 -5.38 6.31
 -1 5 -14 1.89 3.11
 -1 -5 -13 83.26 14.15
 -1 5 -13 59.28 10.29
 -1 -5 -12 -1.32 4.06
 -1 5 -12 8.16 4.18
 -1 -5 -11 3.66 2.53
 -1 5 -11 8.12 3.21
 -1 -5 -10 46.25 9.12
 -1 5 -10 50.3 7.97
 -1 -5 -9 124.74 4.6
 -1 -5 -9 129.8 14.8
 -1 5 -9 145 12.49
 -1 -5 -8 21.83 2.56
 -1 5 -8 29.2 5.37
 -1 5 -7 477.16 20.16
 -1 5 -6 96.18 8.65
 -1 -5 -5 145.51 13.12
 -1 -5 -5 151.39 8.37
 -1 5 -5 129.73 9.45
 -1 -5 -5 141.69 12.64
 -1 -5 -4 149.82 12.85
 -1 -5 -4 151.37 7.33
 -1 5 -4 150.12 9.55
 -1 -5 -4 149.5 12.15
 -1 -5 -3 2024.51 46.25
 -1 5 -3 1998.65 33.16
 -1 5 -3 1913.53 38.14
 -1 -5 -3 1986.39 41.53
 -1 -5 -2 372.04 19.6
 -1 5 -2 340.67 12.94
 -1 5 -2 341.51 15.54
 -1 -5 -2 323.89 15.41
 -1 -5 -1 203.87 14.35
 -1 5 -1 193.32 11.54
 -1 -5 -1 210.08 11.26
 -1 -5 0 -0.1 1.44
 -1 5 0 8.13 3.4
 -1 -5 0 5.78 1.97
 -1 -5 0 3.68 1.67
 -1 5 0 4.76 2.05
 -1 5 1 223.64 14.67
 -1 -5 1 245.95 15.04
 -1 -5 1 242.05 11.3
 -1 -5 1 251.64 9.73
 -1 -5 1 236.43 8.17
 -1 5 1 228.76 12.94
 -1 -5 1 231.77 9.09
 -1 -5 1 228.62 9.65
 -1 5 2 18.24 4.63
 -1 -5 2 32.71 4.53
 -1 -5 2 19.04 3.02
 -1 -5 2 19.67 2.76
 -1 -5 2 21.64 4.55
 -1 -5 2 20.75 2.38
 -1 5 2 19.52 3.01
 -1 -5 2 22.2 2.97
 -1 5 2 29.96 4.97
 -1 -5 3 361.09 15.04
 -1 5 3 347.46 18.9
 -1 -5 3 316.59 16.67
 -1 -5 3 333.92 14.52
 -1 -5 3 343.98 12.83
 -1 5 3 332.75 9.66
 -1 5 3 326.82 12.92
 -1 -5 3 349.76 12.26
 -1 -5 3 339.4 10.26
 -1 5 3 368.58 17.76
 -1 -5 3 359.11 6.87
 -1 -5 4 69.37 7.82
 -1 5 4 75.75 9.05
 -1 -5 4 73.23 7.07
 -1 5 4 68.74 4.76
 -1 -5 4 69.48 6.4
 -1 -5 4 82.93 8.12
 -1 5 4 71.33 5.63
 -1 -5 4 71.64 6.12
 -1 -5 4 82.12 5.83
 -1 5 4 81.92 8.94
 -1 -5 4 72.63 3.75
 -1 -5 5 349.75 17.54
 -1 5 5 343.18 20.07
 -1 -5 5 389.13 17.07
 -1 5 5 352.48 12.3
 -1 -5 5 374.37 15.94
 -1 -5 5 369.77 18.41
 -1 5 5 367.11 14.58
 -1 -5 5 381.65 15.37
 -1 -5 5 375.17 14.24
 -1 -5 5 378.58 10.95
 -1 5 6 113.7 11.81
 -1 -5 6 109.1 10.01
 -1 -5 6 111.11 9.67
 -1 5 6 105.33 7.42
 -1 -5 6 113.64 11.04
 -1 -5 6 108.23 9.31
 -1 5 6 103.22 8.82
 -1 -5 6 109.03 9.09
 -1 -5 6 92.72 8.11
 -1 -5 6 105.97 7.2
 -1 -5 7 316.03 17.28
 -1 5 7 309.84 20.47
 -1 -5 7 311.82 16.75
 -1 5 7 327.88 14.24
 -1 5 7 324.09 16.96
 -1 -5 7 336.26 20.03
 -1 -5 7 333.78 17.96
 -1 -5 7 311.45 16.24
 -1 -5 7 323.31 14.35
 -1 -5 8 7.59 2.7
 -1 -5 8 19.3 4.68
 -1 5 8 22.48 5.31
 -1 5 8 11.49 4.65
 -1 5 8 18.58 3.84
 -1 -5 8 26.6 6.99
 -1 -5 8 10.89 3.64
 -1 -5 8 18.3 4.55
 -1 -5 8 13.95 3.42
 -1 -5 9 51.9 9.83
 -1 5 9 36.93 7.82
 -1 5 9 42.45 6.02
 -1 5 9 56.27 8.45
 -1 -5 9 40.91 6.8
 -1 -5 9 53.99 7.74
 -1 -5 9 48.24 6.89
 -1 -5 10 91.29 13.07
 -1 5 10 78.02 11.41
 -1 5 10 90.31 11.96
 -1 -5 10 85.94 9.93
 -1 -5 10 81.1 9.74
 -1 -5 10 73.62 9.36
 -1 -5 11 68.15 11.7
 -1 5 11 55.75 9.34
 -1 5 11 67.97 11.25
 -1 -5 11 63.25 9.04
 -1 -5 11 45 7.87
 -1 5 12 8.15 5.03
 -1 -5 12 8.51 5.95
 -1 5 12 2.22 3.23
 -1 -5 12 5.71 3.16
 -1 -5 12 2.87 2.54
 -1 5 13 36.29 8.62
 -1 5 13 51.88 10.6
 -1 -5 13 42.87 10.51
 -1 -5 13 30.22 6.76
 -1 -5 13 43.1 8.56
 -1 -5 14 4.43 5.37
 -1 5 14 8.26 4.9
 -1 5 14 8.31 6.39
 -1 -5 14 1.45 2.15
 -1 -5 14 1.75 2.89
 -1 5 15 89.04 15.47
 -1 -5 15 68.22 13.71
 -1 5 16 17 8.86
 -1 5 17 22.25 9.14
 -1 7 -16 11.16 6.13
 -1 7 -15 26.76 7.71
 -1 -7 -14 3.99 6.2
 -1 7 -14 7.78 4.42
 -1 -7 -13 30.11 9.41
 -1 7 -13 27.92 6.83
 -1 7 -12 35.26 7.68
 -1 -7 -12 43.58 10.97
 -1 7 -11 28.02 6.41
 -1 -7 -11 32.12 8.6
 -1 -7 -11 35.77 6.55
 -1 -7 -10 30.35 2.91
 -1 7 -10 31.96 6.66
 -1 -7 -10 24.16 7.41
 -1 -7 -10 36 6.14
 -1 7 -9 50.78 7.66
 -1 -7 -9 56.54 7.01
 -1 7 -8 28.82 5.5
 -1 -7 -8 34.24 5.25
 -1 -7 -7 182.45 10.72
 -1 7 -7 157.59 12.06
 -1 7 -6 5.18 2.63
 -1 -7 -6 2.78 1.83
 -1 7 -5 263.26 14.31
 -1 -7 -5 276.17 11.3
 -1 7 -4 166.42 10.87
 -1 7 -4 162.42 12.82
 -1 -7 -4 157.27 13.9
 -1 -7 -3 535.93 27.95
 -1 7 -3 517.75 18.33
 -1 7 -3 516.98 22.29
 -1 -7 -3 538.55 24.01
 -1 -7 -2 41.86 8.02
 -1 -7 -2 34.22 5.75
 -1 7 -2 43.54 6.51
 -1 7 -1 552.18 26.33
 -1 -7 -1 481.91 26.28
 -1 7 -1 530.39 22.29
 -1 -7 -1 519.64 20.81
 -1 7 0 366.54 21.84
 -1 -7 0 347.87 14.91
 -1 -7 0 313.26 20.96
 -1 7 0 334.98 17.92
 -1 -7 0 353.29 15.8
 -1 7 1 177.82 15.52
 -1 -7 1 174.22 15.41
 -1 -7 1 193.35 11.65
 -1 -7 1 178.77 7.66
 -1 -7 1 182.71 8.8
 -1 7 1 198.4 13.83
 -1 -7 1 199.48 11.31
 -1 -7 1 180.19 10.16
 -1 7 2 2.73 3.03
 -1 -7 2 2.94 1.99
 -1 -7 2 6.12 2.94
 -1 -7 2 4.3 1.63
 -1 -7 2 3.02 1.51
 -1 7 2 2.44 1.61
 -1 -7 2 1.75 1.17
 -1 -7 2 3.83 1.61
 -1 7 2 4.82 2.67
 -1 7 3 432.55 24.66
 -1 -7 3 395.13 22.46
 -1 -7 3 477.43 19.59
 -1 -7 3 451.24 15.55
 -1 -7 3 478.1 18.05
 -1 7 3 431.61 21.8
 -1 7 3 468.36 17.16
 -1 -7 3 446.12 16.58
 -1 -7 3 462.84 14.07
 -1 7 4 12.77 4.79
 -1 -7 4 17.79 2.04
 -1 -7 4 15.75 4.68
 -1 -7 4 17.07 4.17
 -1 -7 4 15.16 3.34
 -1 -7 4 17.2 4.14
 -1 7 4 12.83 2.16
 -1 7 4 14.74 3.1
 -1 -7 4 17.44 2.93
 -1 7 4 16.26 4.86
 -1 -7 4 16.47 3.37
 -1 -7 5 377.95 21.77
 -1 7 5 382.24 24.24
 -1 -7 5 425.67 20.04
 -1 -7 5 425.13 17.78
 -1 -7 5 397.39 19.77
 -1 7 5 394.96 14.01
 -1 -7 5 419.53 17.65
 -1 -7 5 415.68 15.47
 -1 7 5 408.9 23.13
 -1 -7 5 392.06 10.4
 -1 -7 6 63.58 8.12
 -1 -7 6 64.3 9.1
 -1 -7 6 72.12 9.28
 -1 7 6 64.11 5.44
 -1 7 6 69.86 10.81
 -1 7 6 74.76 7.2
 -1 -7 6 59.16 6.56
 -1 -7 6 69.13 7.62
 -1 7 6 78.89 10.67
 -1 -7 6 67.82 5.04
 -1 -7 7 253.17 18.32
 -1 7 7 264.03 21.21
 -1 -7 7 290.26 17.82
 -1 7 7 262.76 12.28
 -1 7 7 282.29 15.35
 -1 -7 7 308.24 19.89
 -1 -7 7 254.35 15.5
 -1 -7 7 276.49 15.51
 -1 7 7 301.67 21.71
 -1 -7 7 260.22 11.51
 -1 -7 8 77.29 9.57
 -1 -7 8 72.17 10.07
 -1 7 8 77.78 11.79
 -1 7 8 63.49 6.64
 -1 -7 8 76.22 10.82
 -1 7 8 74.31 8.64
 -1 -7 8 69.08 8.43
 -1 -7 8 69.88 6.83
 -1 -7 8 65.05 8.57
 -1 7 9 31.56 6.42
 -1 7 9 46.69 9.41
 -1 7 9 45.22 6.09
 -1 -7 9 53.66 10.12
 -1 -7 9 51.41 8.22
 -1 -7 9 42.36 8.02
 -1 -7 9 44.59 7.65
 -1 -7 9 37.67 5.82
 -1 7 10 18.89 5.27
 -1 -7 10 11.72 6.89
 -1 7 10 7.31 4.5
 -1 -7 10 9.8 4.02
 -1 -7 10 6.68 3.66
 -1 -7 10 10.17 3.47
 -1 7 11 25.85 6.99
 -1 -7 11 45.2 9.91
 -1 7 11 33.85 8.89
 -1 -7 11 46.37 8.51
 -1 -7 11 29.69 6.17
 -1 7 12 14.45 5.63
 -1 -7 12 15.99 6.9
 -1 7 12 16.61 6.62
 -1 -7 12 9.33 3.66
 -1 -7 12 4.69 3.06
 -1 -7 13 65.33 10.68
 -1 -7 13 61.21 12.3
 -1 7 13 62.64 12.53
 -1 7 13 73.71 12.75
 -1 -7 14 4.45 3.69
 -1 -7 14 -2.02 4.17
 -1 7 14 0.1 2.59
 -1 7 14 4.81 5.29
 -1 7 15 43.46 10.64
 -1 -7 15 39.2 11.51
 -1 7 16 20.6 8.54
 -1 7 17 34.3 10.3
 -1 9 -15 -2.39 3.68
 -1 9 -14 12.65 5.29
 -1 -9 -13 -5.12 5.92
 -1 9 -13 7 4.29
 -1 -9 -12 5.58 3.17
 -1 9 -12 -1.25 2.45
 -1 -9 -11 166.57 20.63
 -1 -9 -11 146.95 11.93
 -1 9 -11 155.3 14.88
 -1 9 -10 6.66 3.79
 -1 -9 -10 2.04 1.53
 -1 9 -9 90.28 10.61
 -1 -9 -9 91.99 8.47
 -1 -9 -8 4.18 2.33
 -1 9 -8 2.51 2.19
 -1 9 -7 168.84 13.14
 -1 9 -6 63.86 7.78
 -1 9 -5 643.19 23.8
 -1 9 -5 648.72 28.78
 -1 9 -4 5.69 3.13
 -1 9 -3 246.64 17.26
 -1 9 -2 125.3 12.21
 -1 -9 -2 113.93 11.47
 -1 9 -1 222.42 19
 -1 -9 -1 192.99 12.51
 -1 9 -1 209.49 15.72
 -1 -9 -1 207.15 14.98
 -1 9 0 10.61 4.15
 -1 -9 0 26.45 5.14
 -1 -9 0 16.4 3.93
 -1 9 0 18.52 5.05
 -1 9 1 123.7 14.84
 -1 -9 1 111.3 10.1
 -1 -9 1 125.06 6.8
 -1 9 1 129.97 12.73
 -1 -9 1 112.11 9.57
 -1 -9 2 14.78 4.05
 -1 9 2 18.15 5.8
 -1 -9 2 21.21 3.31
 -1 -9 2 17.24 3.45
 -1 9 2 16.18 3.88
 -1 -9 2 13.77 2.85
 -1 9 2 17.93 4.81
 -1 -9 2 12.82 2.91
 -1 -9 2 16.22 3.85
 -1 9 3 168.45 17.43
 -1 -9 3 151.7 12.37
 -1 -9 3 165.8 11.19
 -1 -9 3 165.75 10.01
 -1 9 3 156.43 11.13
 -1 9 3 170.38 15.11
 -1 -9 3 173.29 11.86
 -1 -9 3 178.92 10.14
 -1 9 4 13.17 5.45
 -1 -9 4 12.46 3.98
 -1 -9 4 11.46 3.01
 -1 -9 4 8.89 2.58
 -1 9 4 3.5 1.62
 -1 -9 4 17.13 3.29
 -1 -9 4 11.59 3.13
 -1 9 4 8.45 3.3
 -1 -9 5 51.36 7.7
 -1 9 5 36.38 8.65
 -1 9 5 43.61 3.78
 -1 -9 5 49.28 7.19
 -1 -9 5 53.1 6.76
 -1 -9 5 44.12 5.44
 -1 9 5 45.07 8.04
 -1 -9 5 43.36 3.7
 -1 -9 5 52.27 6.89
 -1 9 6 91.42 13.6
 -1 -9 6 69.7 9.26
 -1 -9 6 73.27 9.63
 -1 9 6 67.78 5.91
 -1 -9 6 88.54 9.61
 -1 -9 6 73.77 7.6
 -1 9 6 83.18 11.71
 -1 -9 6 70.73 4.95
 -1 -9 7 43.33 7.67
 -1 9 7 54.81 11.13
 -1 -9 7 49.71 8.45
 -1 9 7 37.85 5.35
 -1 -9 7 47.77 6.73
 -1 9 7 45.52 9.35
 -1 -9 7 49.47 4.66
 -1 -9 7 45.33 6.98
 -1 -9 8 17.82 4.8
 -1 -9 8 42.24 8.69
 -1 9 8 20.13 4.17
 -1 9 8 20.82 3.44
 -1 9 8 30.91 8.58
 -1 -9 8 20.56 4.61
 -1 9 8 21.95 6.84
 -1 -9 8 15.44 4.28
 -1 -9 8 21.05 3.53
 -1 9 9 59.94 11.84
 -1 -9 9 49.56 9.77
 -1 9 9 60.98 8.1
 -1 -9 9 58.56 9.62
 -1 9 9 64.75 11.8
 -1 -9 9 53.31 6.1
 -1 -9 10 0.69 2.66
 -1 9 10 -0.53 1.91
 -1 9 10 4.93 4.53
 -1 -9 10 5.07 3.1
 -1 9 10 -1.22 3.27
 -1 -9 10 0.76 1.91
 -1 -9 11 121.13 16.57
 -1 9 11 98.66 16.01
 -1 9 11 126.87 13.49
 -1 -9 11 114.29 14.12
 -1 9 11 130.26 17.98
 -1 -9 12 1.81 3.94
 -1 9 12 -0.17 2.35
 -1 9 12 1.75 4.95
 -1 -9 12 -3.54 3.19
 -1 9 12 11.04 6.11
 -1 -9 13 32.12 8.72
 -1 9 13 30.28 9.22
 -1 -9 13 32.25 9.11
 -1 9 13 35.08 8.13
 -1 -9 14 1.4 2.33
 -1 9 14 -4.85 4.84
 -1 11 -13 14.67 5.84
 -1 -11 -12 16.51 9.32
 -1 11 -12 4.61 3.62
 -1 11 -11 77.45 10.84
 -1 11 -10 1.79 2
 -1 11 -9 85.99 10.76
 -1 -11 -8 3.03 2.18
 -1 11 -8 4.08 2.57
 -1 11 -7 59.63 8.32
 -1 11 -5 4.08 2.89
 -1 11 -4 46.94 8.58
 -1 11 -3 123.58 13.41
 -1 -11 -2 22.11 4.9
 -1 11 -2 25.13 6.13
 -1 11 -1 174.97 19.27
 -1 -11 -1 165.94 13.04
 -1 11 -1 191.59 16.68
 -1 -11 -1 185.04 15.34
 -1 11 0 35.94 9.21
 -1 -11 0 58.65 8.15
 -1 -11 0 38.77 6.88
 -1 11 0 41.12 7.93
 -1 11 1 218.65 21.65
 -1 -11 1 192.53 14.78
 -1 -11 1 179.93 8.46
 -1 -11 1 196.46 12.45
 -1 11 1 177.05 16.37
 -1 -11 1 174.84 13.41
 -1 11 2 17.62 6.85
 -1 -11 2 24.87 5.91
 -1 -11 2 23.2 3.69
 -1 -11 2 16.7 3.37
 -1 -11 2 26.07 4.54
 -1 -11 2 29 4.97
 -1 -11 2 25.68 5.55
 -1 11 2 34.99 8.2
 -1 -11 3 95.2 10.95
 -1 11 3 95.96 15.1
 -1 -11 3 107.1 8.45
 -1 -11 3 120.32 9.81
 -1 11 3 121.26 14.15
 -1 -11 3 106.97 8.94
 -1 -11 3 100.11 10.2
 -1 -11 3 115.04 9.32
 -1 11 4 10.87 5.85
 -1 -11 4 11.29 4.43
 -1 -11 4 12.64 3.42
 -1 -11 4 16.93 4.43
 -1 -11 4 11.12 2.98
 -1 11 4 10.64 4.45
 -1 -11 4 6 2.48
 -1 -11 4 10.18 2.74
 -1 11 5 249.03 24.49
 -1 -11 5 286.43 19.83
 -1 -11 5 274.5 17.45
 -1 -11 5 281.07 17.42
 -1 11 5 321.94 24.02
 -1 -11 5 269.36 14.74
 -1 -11 5 278.43 10.37
 -1 11 6 317.34 27.92
 -1 -11 6 312.56 21.35
 -1 -11 6 341.08 20.97
 -1 11 6 293.08 23.44
 -1 -11 6 316.99 19
 -1 -11 6 297.5 16.3
 -1 -11 6 278.17 10.13
 -1 11 7 245.79 25.01
 -1 -11 7 286.56 21.21
 -1 11 7 238.86 10.4
 -1 -11 7 252.77 19.35
 -1 -11 7 235.65 15.52
 -1 -11 7 247.66 9.68
 -1 11 7 277.9 23.42
 -1 -11 8 11.12 4.2
 -1 11 8 25.14 7.6
 -1 -11 8 21.62 5.99
 -1 11 8 26.32 7.78
 -1 -11 9 54.14 10.43
 -1 11 9 39.2 10.57
 -1 -11 9 32.09 7.62
 -1 11 9 44.73 10.4
 -1 -11 10 4.68 4.86
 -1 -11 10 6.85 4.81
 -1 11 10 3.79 4.63
 -1 11 10 6.26 6.12
 -1 -11 11 77.37 13.46
 -1 -11 11 93.05 13.78
 -1 11 11 93.84 16.46
 -1 11 11 83.58 15.32
 -1 -11 12 5.31 4.96
 -1 11 12 1.02 3.39
 -1 -11 12 -2.7 4.1
 -1 11 12 2.68 3.8
 -1 -11 13 32.64 10.23
 -1 11 13 26.57 10.99
 -1 -11 13 24.75 7.55
 -1 11 13 14.42 6.71
 -1 -11 14 -3.04 3.64
 -1 11 14 -0.37 3.32
 -1 -11 14 4.31 4.06
 -1 13 -10 10.71 4.49
 -1 -13 -8 5.18 2.83
 -1 -13 -7 59.57 8.22
 -1 -13 -6 16.81 4.57
 -1 13 -6 8.8 4.26
 -1 -13 -5 6.92 3.7
 -1 13 -5 5.4 3.8
 -1 -13 -4 34.49 6.61
 -1 13 -4 23.32 6.18
 -1 -13 -3 206.54 15.82
 -1 13 -3 208.11 19
 -1 -13 -2 8.2 4.02
 -1 13 -2 4.79 3.61
 -1 13 -1 164.76 20.51
 -1 -13 -1 180.48 15.22
 -1 13 -1 166.07 17.04
 -1 13 0 68.74 13.43
 -1 -13 0 78.73 10.21
 -1 13 0 84.7 12.52
 -1 13 1 193.02 22.51
 -1 -13 1 173.23 15.51
 -1 13 1 187.79 18.54
 -1 -13 1 174.85 14.67
 -1 -13 2 14.25 4.42
 -1 13 2 13.06 6.26
 -1 13 2 21.08 6.35
 -1 -13 3 90.06 8.58
 -1 -13 3 75.23 10.76
 -1 13 3 53.75 12.29
 -1 13 3 94.44 13.82
 -1 -13 4 5.87 2.68
 -1 13 4 8.32 5.1
 -1 -13 4 6.28 3.74
 -1 13 4 7.14 5.21
 -1 -13 5 115.59 11.59
 -1 13 5 113.56 18.21
 -1 -13 5 97.66 12.8
 -1 13 5 90.31 14.14
 -1 -13 6 15.98 5.36
 -1 13 6 -3.52 3.99
 -1 -13 6 8.68 4.32
 -1 13 6 7.43 5.59
 -1 -13 7 79.47 11.3
 -1 13 7 97.97 17.38
 -1 -13 7 61.99 10.95
 -1 13 7 77.87 13.59
 -1 -13 8 14.98 5.79
 -1 -13 8 0.65 3.34
 -1 13 8 4 5.66
 -1 13 8 12.42 6.07
 -1 -13 9 28.54 7.37
 -1 -13 9 20.3 6.64
 -1 13 9 18.38 8.45
 -1 13 9 21.37 7.86
 -1 -13 10 -5 4.96
 -1 -13 10 12.5 6.32
 -1 13 10 12.32 7.27
 -1 13 10 -1.81 3.35
 -1 -13 11 46.01 10.74
 -1 13 11 15.82 8.49
 -1 -13 11 29.54 8.76
 -1 13 11 37.47 11.1
 -1 -13 12 16.63 7.07
 -1 13 12 5.74 4.27
 -1 -13 12 4.21 4.76
 -1 -13 13 32.27 10.45
 -1 13 13 20.4 9.73
 -1 -13 13 12.39 6.39
 -1 -15 -7 35.47 7.03
 -1 -15 -6 7.94 4.36
 -1 15 -6 2.13 3.39
 -1 -15 -5 19.95 5.49
 -1 15 -5 12.35 5.18
 -1 -15 -4 -0.12 1.96
 -1 15 -4 4 3.77
 -1 -15 -3 88.4 11.46
 -1 15 -3 92.54 13.59
 -1 -15 -2 25.18 6.93
 -1 15 -2 24.49 7.45
 -1 -15 -1 29.28 7.2
 -1 15 -1 42.62 9.41
 -1 15 0 4.72 5.78
 -1 -15 0 -0.59 2.31
 -1 15 0 4.13 4.12
 -1 15 1 14.76 7.77
 -1 -15 1 21.73 6.72
 -1 15 1 10.4 5.07
 -1 15 2 -0.79 4.05
 -1 -15 2 0.89 2.54
 -1 15 2 -0.78 2.83
 -1 15 3 106.55 18.42
 -1 -15 3 82.96 12.15
 -1 15 3 84.49 14.04
 -1 15 4 2.41 4.57
 -1 -15 4 -0.43 2.9
 -1 15 4 -0.86 3.11
 -1 15 5 107.59 19.01
 -1 -15 5 75.39 12.12
 -1 15 5 103.75 16.02
 -1 -15 6 1.15 4.56
 -1 15 6 1.49 4.27
 -1 15 6 2.13 3.4
 -1 15 7 50.25 13.18
 -1 -15 7 73.22 12.74
 -1 15 7 74.53 14.48
 -1 15 8 2.45 4.52
 -1 -15 8 -3.96 4.23
 -1 15 8 5.25 5.67
 -1 15 9 34.43 12.28
 -1 -15 9 55.37 12.03
 -1 15 9 33.83 10.51
 -1 15 10 6.29 6.11
 -1 -17 -6 6.79 4.79
 -1 -17 -5 66.7 11.17
 -1 -17 -4 21.33 6.63
 -1 -17 -3 81.56 12.17
 -1 17 -3 36.6 9.44
 -1 -17 -2 19.64 6.59
 -1 17 -2 2.04 3.81
 -1 -17 -1 48.3 9.82
 -1 17 -1 55.4 12.01
 -1 -17 0 5.56 4.28
 -1 17 0 -0.52 2.23
 -1 17 1 18.54 9.13
 -1 -17 1 17.53 6.63
 -1 17 1 22.53 7.76
 -1 17 2 3.35 4.33
 -1 -17 2 7.75 5.24
 -1 17 2 -4.01 3.21
 -1 17 3 30.31 10.54
 -1 -17 3 13.52 6.13
 -1 17 3 37.76 10.77
 -1 17 4 3.61 5.86
 -1 -17 4 1.43 3.14
 -1 17 4 14.34 10.07
 -1 17 5 23.44 10.23
 -1 -17 5 36.14 9.15
 -1 17 5 26.83 9.01
 -1 17 6 7.8 6.44
 -1 17 7 21.79 9.26
 -1 -19 -5 43.74 10.6
 -1 19 2 5.33 4.88
 -1 19 3 31.37 10.62
 -1 19 4 14.16 7.79
 0 0 -16 23.46 8.24
 0 0 -15 7.16 4.79
 0 0 -14 81.83 13.18
 0 0 -13 0.61 3.09
 0 0 -12 72 11.17
 0 0 -11 3.02 3.29
 0 0 -10 29.73 3.86
 0 0 -10 22.66 5.94
 0 0 -9 0.07 1.07
 0 0 -9 5.36 2.8
 0 0 -8 177.77 8.18
 0 0 -8 172.33 13.92
 0 0 -8 166.95 12.72
 0 0 -7 11.13 2.26
 0 0 -7 21.2 5.42
 0 0 -7 12.54 3.84
 0 0 -6 73.55 4.72
 0 0 -6 78.03 8.19
 0 0 -6 72.8 7.49
 0 0 -5 0.54 0.71
 0 0 -5 0.63 1.37
 0 0 -5 2.7 1.74
 0 0 -4 305.34 7.93
 0 0 -4 297.76 12.9
 0 0 -4 310.93 12.4
 0 0 -3 0.33 0.44
 0 0 -3 0.21 0.72
 0 0 -3 0.95 1.08
 0 0 3 -0.2 0.35
 0 0 3 1.51 1.6
 0 0 4 297.54 8.42
 0 0 4 327.43 13.34
 0 0 5 1.55 0.97
 0 0 5 4.02 2.04
 0 0 6 71.38 5.2
 0 0 6 73.95 8.2
 0 0 7 26.3 3.62
 0 0 7 16.11 4.59
 0 0 8 180.5 9.48
 0 0 8 179.66 14.67
 0 0 9 1.98 1.38
 0 0 9 2.27 3.04
 0 0 10 30.39 4.5
 0 0 10 22.42 6.04
 0 0 11 7.06 4.45
 0 0 11 -1.6 3.21
 0 0 12 85.98 10.76
 0 0 12 84.39 13.18
 0 0 13 3.61 2.87
 0 0 13 3.12 2.45
 0 0 14 65.09 10.52
 0 0 14 78.55 14.14
 0 0 15 2.25 2.56
 0 0 16 22.44 8.89
 0 0 16 14.43 7.18
 0 0 17 0.14 3.79
 0 2 -17 14.68 6.43
 0 -2 -16 20.12 7.19
 0 2 -16 23.99 7.82
 0 -2 -15 8.49 5.5
 0 2 -15 8.88 5.55
 0 -2 -14 115.64 15.98
 0 2 -14 120.81 15.06
 0 -2 -13 1.82 3.66
 0 2 -13 4.12 4.23
 0 -2 -12 63.12 11.43
 0 2 -12 61.28 9.98
 0 -2 -11 166.66 7.75
 0 -2 -11 145.41 16.33
 0 2 -11 149.17 14.8
 0 -2 -10 227.43 9.01
 0 -2 -10 232.51 18.98
 0 2 -10 228.35 17.37
 0 -2 -9 13.74 2.24
 0 -2 -9 11.56 3.92
 0 2 -9 20.31 5.01
 0 2 -9 21.62 4.97
 0 -2 -8 606.81 14.1
 0 -2 -8 616.5 27.71
 0 2 -8 601.26 24.7
 0 2 -8 601.59 22.24
 0 -2 -7 9.07 1.72
 0 2 -7 4.89 1.62
 0 -2 -7 6.67 3.35
 0 2 -7 7.27 2.34
 0 -2 -6 277.49 9.16
 0 2 -6 284.74 10.77
 0 2 -6 271.78 13.93
 0 -2 -6 289.24 16.64
 0 2 -6 287.57 12.8
 0 -2 -5 56.99 4.02
 0 2 -5 56.21 4.55
 0 2 -5 57.02 5.86
 0 -2 -5 56.41 6.89
 0 2 -5 55.22 5.09
 0 2 -4 666.18 14.46
 0 2 -4 624.21 16.9
 0 -2 -4 627.1 20.88
 0 2 -4 646.45 15.01
 0 2 -3 4.6 1.04
 0 -2 -3 3.03 1.61
 0 2 -3 6.46 1.63
 0 -2 -3 8.76 2.51
 0 -2 -2 91.49 6.33
 0 2 -2 102.15 4.82
 0 -2 -2 96.77 6.72
 0 2 2 95.06 6.72
 0 -2 2 95.38 4.89
 0 -2 2 97.88 5.37
 0 -2 2 92.52 4.79
 0 2 2 100.95 6.79
 0 -2 2 98.12 4.04
 0 -2 3 6.04 1.56
 0 2 3 5.11 1.82
 0 -2 3 5.89 1.79
 0 2 3 9.65 2.46
 0 -2 3 5.78 1.52
 0 2 4 661.54 20.1
 0 -2 4 667.17 15.45
 0 -2 4 652.23 18.37
 0 2 4 633.9 21.68
 0 -2 4 640.72 16.05
 0 -2 5 59.27 5.03
 0 2 5 47.28 5.73
 0 -2 5 66.04 6.7
 0 -2 5 59.16 5.74
 0 2 5 47.51 6.61
 0 2 6 272.34 14.82
 0 -2 6 314.78 12.47
 0 -2 6 248.05 14.32
 0 2 6 283.8 17.3
 0 -2 6 282.58 14.2
 0 2 7 4.54 2.31
 0 -2 7 8.45 2.31
 0 2 7 4.73 2.03
 0 -2 7 7.33 3.31
 0 -2 8 608.53 19.69
 0 2 8 579.66 24.26
 0 2 8 602.39 28.72
 0 -2 8 616.92 25.4
 0 2 9 16.17 4.88
 0 -2 9 17.82 3.67
 0 -2 9 14.36 4.9
 0 2 9 10.59 4.09
 0 -2 10 227.15 13.28
 0 2 10 223.71 16.92
 0 -2 10 222.5 18.15
 0 2 10 197.34 18.47
 0 -2 11 173.81 12.18
 0 2 11 154.96 14.76
 0 2 11 163.83 18.16
 0 -2 11 147.48 15.71
 0 2 12 56.79 9.35
 0 -2 12 53.92 7.08
 0 -2 12 62.73 10.85
 0 2 12 67.41 12.02
 0 2 13 -3.15 2.79
 0 -2 13 -1.99 1.74
 0 2 13 2.61 4.83
 0 -2 13 -1.77 2.92
 0 2 14 87.43 12.7
 0 2 14 123.89 17.87
 0 -2 14 116.14 16.34
 0 2 15 0.76 2.64
 0 -2 15 3.88 4.44
 0 2 16 31.39 9.49
 0 -2 16 32.51 11.01
 0 2 16 23.12 9.1
 0 -2 16 22.16 8.42
 0 -2 17 3.65 5.36
 0 -2 18 11.39 6.97
 0 4 -17 -3.57 4.62
 0 -4 -16 32.99 10.41
 0 4 -16 16.5 6
 0 -4 -15 -3.29 3.61
 0 4 -15 7.83 4.48
 0 -4 -14 63.52 12.51
 0 4 -14 38.27 8.57
 0 -4 -13 10.55 5.68
 0 4 -13 9.53 4.41
 0 -4 -12 91.84 13.78
 0 4 -12 75.54 10.96
 0 -4 -11 1.7 1.07
 0 -4 -11 -2.32 3.05
 0 4 -11 1.95 2.88
 0 -4 -10 68.39 5.15
 0 -4 -10 71.03 11.21
 0 4 -10 72.76 9.27
 0 -4 -9 3.28 1.41
 0 4 -9 12.13 3.41
 0 4 -9 7.11 3.28
 0 -4 -8 645.96 17.1
 0 4 -8 644.05 23.83
 0 4 -8 690.59 21.78
 0 4 -7 37.63 4.71
 0 4 -7 40.94 5.7
 0 -4 -6 201.94 14.31
 0 4 -6 186.19 10.9
 0 -4 -6 197.67 15.33
 0 4 -6 198.73 9.84
 0 -4 -5 68.93 8
 0 4 -5 56.83 5.5
 0 -4 -5 52.06 7.42
 0 -4 -4 155.67 11.56
 0 -4 -4 148.87 8.15
 0 4 -4 150.26 8.22
 0 -4 -4 134.69 11.13
 0 -4 -3 30.56 5.17
 0 -4 -3 28.38 3.26
 0 4 -3 30.95 3.37
 0 -4 -3 30.16 4.93
 0 4 -3 33.1 4.09
 0 4 -2 814.67 23.24
 0 -4 -2 854.8 26.71
 0 4 -2 829 15.94
 0 4 -2 795.87 19.06
 0 -4 -2 790.03 23
 0 4 -1 101.63 8.58
 0 -4 -1 100.35 9.03
 0 4 -1 96.86 6.55
 0 4 0 465.65 18.43
 0 -4 0 447.58 18.18
 0 4 0 453.31 14.23
 0 -4 0 466.17 14.42
 0 -4 1 97.25 8.38
 0 4 1 89.97 8.55
 0 -4 1 94.97 4.92
 0 -4 1 91.73 5.32
 0 -4 1 100.89 6.62
 0 4 1 96.54 7.06
 0 -4 2 749.29 23.14
 0 4 2 776.96 25.54
 0 -4 2 800.45 19.39
 0 4 2 805.74 15.48
 0 -4 2 828.58 16.48
 0 -4 3 28.13 4.69
 0 -4 3 31.45 4
 0 4 3 32.05 2.45
 0 4 3 27.17 5.1
 0 -4 3 29.09 3.39
 0 -4 3 25.42 3.73
 0 -4 3 32.09 2.98
 0 -4 4 136.32 10.33
 0 4 4 151.41 12.26
 0 -4 4 133.35 8.43
 0 4 4 136.14 6.24
 0 -4 4 135.46 9.31
 0 -4 4 129.74 8.28
 0 4 4 149.39 11.73
 0 -4 4 151.67 7.26
 0 -4 5 59.98 6.02
 0 4 5 52.44 7.47
 0 -4 5 67.86 7.36
 0 -4 5 54.87 6.25
 0 4 5 52.5 7.49
 0 -4 5 60.74 5.19
 0 4 6 176.29 14.27
 0 -4 6 194.36 11.24
 0 -4 6 201.11 14.1
 0 -4 6 186.55 12.35
 0 4 6 179.83 14.79
 0 -4 6 203.71 10.94
 0 -4 7 46.73 5.83
 0 4 7 52.8 8.13
 0 -4 7 35.51 5.91
 0 4 7 42.55 7.73
 0 -4 7 37.68 5.28
 0 -4 8 662.98 23.19
 0 4 8 668.92 29.77
 0 -4 8 632.39 26.8
 0 4 8 668.63 32.15
 0 -4 8 657.96 24.49
 0 4 9 4.6 2.51
 0 -4 9 7.74 2.85
 0 4 9 2.58 3.12
 0 -4 9 10.3 3.55
 0 4 10 67.81 10.56
 0 -4 10 66.18 8.07
 0 4 10 72.7 11.75
 0 -4 10 71.55 9.86
 0 4 11 0.98 3.2
 0 -4 11 2.27 2.02
 0 4 11 1.23 3.16
 0 -4 11 0.72 2.88
 0 4 12 65.72 11.02
 0 -4 12 81.42 9.76
 0 4 12 70.54 12.98
 0 -4 12 71.05 11.5
 0 4 13 3.14 3.34
 0 -4 13 6.34 3.41
 0 4 13 2.14 2.84
 0 -4 13 7.49 4.4
 0 4 14 55.83 11.27
 0 4 14 45.74 11.8
 0 -4 14 66.97 12.32
 0 -4 15 13.04 7.94
 0 4 15 9.44 5.71
 0 -4 15 4.65 5.79
 0 4 16 35.45 10.48
 0 -4 16 25.29 9.71
 0 -4 16 20.87 7.43
 0 6 -17 14.61 6.06
 0 6 -16 28.94 7.87
 0 -6 -15 1.65 3.77
 0 6 -15 4.6 4.36
 0 -6 -14 95.24 16.28
 0 6 -14 85.48 12.24
 0 -6 -13 2.24 4.14
 0 6 -13 -1.2 2.02
 0 -6 -12 53.64 11.37
 0 6 -12 58.79 9.15
 0 6 -11 20.48 5.46
 0 -6 -10 35.88 4.69
 0 6 -10 34.5 6.46
 0 6 -9 9.73 3.56
 0 -6 -8 227.38 14.4
 0 6 -8 207.58 13.32
 0 6 -7 20.58 4.1
 0 -6 -7 21.1 4.1
 0 -6 -6 408.49 23.21
 0 -6 -6 440.57 17.13
 0 6 -6 407.22 16.5
 0 -6 -5 13.43 4.51
 0 6 -5 3.69 1.61
 0 -6 -5 5.23 2.28
 0 -6 -5 10.53 3.72
 0 -6 -4 600.18 27.63
 0 6 -4 600.94 17.64
 0 6 -4 583.67 20.65
 0 -6 -4 575.89 16.69
 0 -6 -4 568.17 25.42
 0 -6 -3 12.68 4.55
 0 6 -3 19.14 3.33
 0 6 -3 15.4 3.73
 0 -6 -3 8.98 3.46
 0 6 -2 409.24 20.56
 0 -6 -2 451.8 23.46
 0 6 -2 420.75 16.77
 0 -6 -2 434.18 19.57
 0 -6 -1 14.86 4.57
 0 6 -1 17.31 4.22
 0 6 -1 15.35 3.28
 0 -6 -1 7.93 2.61
 0 -6 0 16.56 4.89
 0 6 0 15.36 4.7
 0 -6 0 13.76 3.31
 0 6 0 21.37 4.07
 0 -6 1 11.65 3.81
 0 6 1 13.55 4.43
 0 -6 1 13.65 2.19
 0 -6 1 13.87 2.61
 0 -6 1 17.61 3.52
 0 6 1 10.72 2.84
 0 -6 2 404.2 21.02
 0 6 2 431.89 22.7
 0 -6 2 431.3 13.98
 0 -6 2 426.41 14.26
 0 -6 2 431.01 17.14
 0 6 2 425.67 13.52
 0 6 2 446.51 19.04
 0 -6 3 10.94 3.43
 0 -6 3 18.25 5.09
 0 6 3 12.99 5.04
 0 -6 3 15.29 3.04
 0 6 3 13.64 2.76
 0 6 3 15.08 4.35
 0 -6 3 10.33 3.37
 0 -6 4 564.83 25.22
 0 -6 4 561.49 20.01
 0 6 4 549.5 26.87
 0 6 4 567.24 11.25
 0 -6 4 552.34 20.93
 0 -6 4 577.65 18.26
 0 -6 4 601.14 14.84
 0 -6 5 7.63 2.02
 0 -6 5 12.19 4.04
 0 -6 5 12.29 3.52
 0 6 5 7.96 1.65
 0 6 5 7.88 3.91
 0 -6 5 7.69 2.32
 0 -6 5 9.25 2.92
 0 -6 6 408.75 22.34
 0 6 6 377.5 23.71
 0 -6 6 412.51 18.65
 0 6 6 426.67 13.7
 0 -6 6 398.99 20.06
 0 -6 6 366.57 17.47
 0 -6 6 410.29 15
 0 -6 7 16.6 4.88
 0 -6 7 17.67 4.03
 0 6 7 16.09 5.35
 0 6 7 20.67 3.39
 0 -6 7 16.92 4.25
 0 -6 7 19.59 5.1
 0 -6 7 23.52 4.22
 0 -6 8 199.56 16.22
 0 6 8 204.27 18.72
 0 -6 8 212.94 14.45
 0 6 8 185.74 11.05
 0 -6 8 218.95 17.24
 0 6 8 177.21 17.45
 0 -6 8 199.16 12.79
 0 6 9 19.11 4.2
 0 6 9 8.62 4.58
 0 -6 9 14.09 4.54
 0 6 9 21.43 6.61
 0 -6 9 21.6 5
 0 6 10 40.22 8.95
 0 -6 10 41.12 7.16
 0 -6 10 43.98 7.53
 0 6 10 41.11 9.53
 0 6 11 14.27 5.83
 0 -6 11 13.42 4.21
 0 -6 11 21.27 5.69
 0 6 12 51.68 11.15
 0 -6 12 39.77 7.65
 0 -6 12 38.84 8.29
 0 6 13 1.63 3.06
 0 -6 13 2.41 2.24
 0 -6 13 -0.09 1.98
 0 -6 14 91.21 15.5
 0 6 14 104.25 16.34
 0 -6 14 99.21 12.66
 0 -6 14 74.22 12.32
 0 6 15 14.49 7.58
 0 -6 15 7.24 6.54
 0 6 15 1.04 3.57
 0 6 16 34.22 10.41
 0 8 -15 10.51 5.25
 0 8 -14 33.39 7.91
 0 -8 -14 53.25 12.83
 0 -8 -14 44.19 8.89
 0 8 -13 3.16 4.15
 0 -8 -13 8.68 6.39
 0 -8 -13 4.27 3.54
 0 8 -12 8.41 3.66
 0 -8 -12 2.27 2.17
 0 8 -11 39.84 7.1
 0 -8 -11 43.48 7.41
 0 -8 -10 198.97 14.81
 0 8 -10 183.02 14.31
 0 8 -9 62.47 7.97
 0 -8 -9 47.31 6.85
 0 -8 -8 133.66 10.89
 0 8 -8 120.59 10.59
 0 -8 -7 1.44 1.61
 0 8 -7 1.27 1.62
 0 8 -6 300.45 15
 0 -8 -6 301.04 14.38
 0 8 -5 11.74 2.96
 0 8 -4 219.29 14.28
 0 -8 -3 33.42 6.49
 0 8 -3 32.81 5.53
 0 8 -2 64.63 9.67
 0 8 -2 63.3 7.49
 0 -8 -2 62.37 8.47
 0 8 -1 193.6 16.63
 0 -8 -1 181.33 17.09
 0 8 -1 213.17 13.81
 0 -8 -1 177.54 13.26
 0 8 0 1232.77 42.85
 0 -8 0 1211.32 43.38
 0 -8 0 1172.62 15.61
 0 8 0 1170.44 33.22
 0 -8 0 1247.18 33.94
 0 8 1 220.88 18.54
 0 -8 1 198.32 17.4
 0 -8 1 210.08 8.47
 0 8 1 198.02 13.99
 0 -8 1 202.49 11.36
 0 -8 1 198.53 13.31
 0 -8 2 64.94 9.96
 0 8 2 68.28 10.69
 0 -8 2 64.69 5.81
 0 -8 2 67.08 6.58
 0 -8 2 66.47 7.61
 0 8 2 74.35 6.65
 0 8 2 53.49 7.6
 0 -8 3 33.49 5.48
 0 8 3 32.25 7.29
 0 -8 3 41.31 7.92
 0 -8 3 29.74 4.68
 0 -8 3 33.55 4.69
 0 8 3 35.28 4.65
 0 8 3 41.64 7.01
 0 -8 3 30.92 5.37
 0 -8 4 206.79 17.77
 0 8 4 238.96 19.97
 0 -8 4 204.42 13.69
 0 -8 4 201.63 12.87
 0 -8 4 233.75 15.21
 0 -8 4 204.37 11.9
 0 8 4 223.02 16.7
 0 -8 5 6.83 1.83
 0 -8 5 22.5 5.02
 0 -8 5 18.32 4.7
 0 8 5 9.7 4.53
 0 -8 5 11.04 2.98
 0 8 5 12.89 4.83
 0 -8 5 18.06 4.5
 0 8 6 332.7 24.64
 0 -8 6 320.29 18.27
 0 8 6 294.42 10.17
 0 -8 6 316.16 18.55
 0 -8 6 308.97 18.76
 0 -8 6 324.11 17
 0 -8 6 312.33 13.09
 0 -8 7 -0.8 2.66
 0 8 7 -0.12 0.8
 0 8 7 4.42 4.32
 0 -8 7 2.06 2.17
 0 -8 7 4.6 2.77
 0 -8 7 2.85 1.77
 0 8 8 133.12 8.93
 0 8 8 109.51 15.09
 0 -8 8 113.21 11.84
 0 -8 8 121.62 9.65
 0 8 9 58.4 6.46
 0 8 9 57.64 11.29
 0 -8 9 44.28 7.65
 0 -8 9 52.05 6.92
 0 -8 10 196.17 18.73
 0 8 10 211.27 22.26
 0 -8 10 212.08 17.23
 0 -8 10 189.98 14.3
 0 8 11 43.53 10.68
 0 -8 11 37.85 9.38
 0 -8 11 49.86 8.81
 0 -8 11 39.9 7.16
 0 8 12 11.26 5.23
 0 8 12 4.47 3.64
 0 -8 12 12.37 6.43
 0 -8 12 7.02 3.97
 0 -8 12 2.42 2.39
 0 -8 13 -0.29 2.05
 0 8 13 11.09 5.34
 0 -8 13 4.6 6.82
 0 8 13 -2.47 4.87
 0 -8 14 31.89 7.32
 0 8 14 42.69 9.79
 0 -8 14 32.97 9.53
 0 8 14 38.8 11.19
 0 8 15 12.88 6.47
 0 -8 15 9.02 5.75
 0 8 15 25.24 9.71
 0 10 -13 1.31 3.71
 0 10 -12 25.01 6.1
 0 10 -11 3.39 3.47
 0 -10 -11 2.01 1.68
 0 10 -10 91.08 10.58
 0 -10 -10 86.5 9.45
 0 -10 -9 8.19 3.4
 0 10 -9 4.11 2.57
 0 10 -8 121.57 11.24
 0 10 -7 13.68 3.57
 0 10 -5 5.92 3.1
 0 10 -4 152.71 13.37
 0 10 -3 16.4 6.21
 0 10 -3 13.7 4.11
 0 10 -2 52.66 10.02
 0 10 -2 45.29 7.47
 0 10 -1 9.96 4.72
 0 -10 -1 8.44 3.66
 0 10 -1 10.09 3.56
 0 10 0 534.63 31.66
 0 -10 0 535.01 11.18
 0 10 0 566.1 26.09
 0 -10 0 536.42 24.29
 0 -10 0 568.13 26.02
 0 10 1 4.88 3.19
 0 -10 1 5.51 1.65
 0 -10 1 7.32 1.6
 0 -10 1 7.64 2.72
 0 -10 1 9.51 3.54
 0 10 1 12.88 4.33
 0 10 2 43.99 9.9
 0 -10 2 51.72 5.33
 0 -10 2 49.14 5.03
 0 -10 2 61.03 7.06
 0 10 2 61.41 6.89
 0 10 2 56.22 8.82
 0 -10 2 59.43 8.19
 0 10 3 17.55 5.53
 0 -10 3 16.27 4.49
 0 -10 3 10.56 2.95
 0 -10 3 13.85 3.55
 0 10 3 16.1 3.7
 0 -10 3 9.87 3.34
 0 10 3 11.59 4.62
 0 10 4 176.43 19.19
 0 -10 4 183.87 14.11
 0 -10 4 172.84 12.36
 0 10 4 149.66 10.91
 0 -10 4 164.8 13.94
 0 -10 4 144.05 10.92
 0 10 4 165.42 15.49
 0 10 5 9.48 4.59
 0 -10 5 4.74 1.9
 0 -10 5 9.52 4.11
 0 -10 5 5.73 3.05
 0 10 5 5.06 1.25
 0 -10 5 2.28 1.71
 0 10 5 4.31 3.03
 0 -10 5 5.57 2.55
 0 -10 6 218.32 16.7
 0 10 6 185.41 9.6
 0 10 6 181.89 20.46
 0 -10 6 190.64 15.45
 0 10 6 174.55 17.39
 0 -10 6 194.31 10.64
 0 10 7 14.68 3.73
 0 -10 7 26.12 6.81
 0 10 7 18.46 7.73
 0 -10 7 9.44 4.2
 0 -10 7 14.01 3.34
 0 10 7 19.78 6.25
 0 10 8 96.57 15.95
 0 10 8 127.96 10.59
 0 -10 8 127.15 14.29
 0 -10 8 137.2 14.02
 0 10 8 119.62 15.87
 0 -10 8 108.11 8.93
 0 10 9 6.08 3.47
 0 -10 9 8.53 4.78
 0 10 9 20.32 7.99
 0 -10 9 13.23 4.81
 0 10 9 9.61 5.52
 0 -10 9 3.48 1.94
 0 -10 10 93.06 14.05
 0 10 10 100.72 16.8
 0 10 10 86.11 10.42
 0 -10 10 112.92 13.93
 0 10 10 90.95 15
 0 -10 11 -2.78 2.37
 0 10 11 3.43 3.21
 0 10 11 -3.7 4.14
 0 -10 12 15.85 6.69
 0 10 12 15.8 7.22
 0 -10 13 5.84 4.1
 0 -10 13 10.85 6.47
 0 10 13 3.25 5.07
 0 -10 14 43.59 9.84
 0 -10 14 41.56 11.29
 0 10 14 38.67 11.45
 0 10 15 2.54 5.39
 0 12 -10 49.18 8.28
 0 12 -9 1.45 2.57
 0 12 -5 6.62 3.5
 0 12 -4 95.74 11.83
 0 12 -3 21.14 5.88
 0 12 -2 258.25 23.92
 0 12 -2 278.39 19.85
 0 12 -1 48.02 10.4
 0 12 -1 48.32 8.46
 0 12 0 391.42 29.83
 0 -12 0 328.83 7.93
 0 12 0 358.67 23.09
 0 -12 1 44.39 4.3
 0 12 1 42.54 10.52
 0 -12 1 39.99 6.96
 0 12 1 38.76 7.73
 0 12 2 253.28 25.03
 0 -12 2 258.06 17.58
 0 -12 2 269.22 11.83
 0 -12 2 240.28 11.48
 0 12 2 267.34 20.86
 0 -12 3 23.98 4.24
 0 -12 3 26.85 4.6
 0 12 3 12.4 6.23
 0 -12 3 35.45 7.19
 0 12 3 30.46 7.4
 0 -12 4 85.99 8.37
 0 -12 4 91.16 9.33
 0 -12 4 99.26 11.67
 0 12 4 90.39 15.19
 0 12 4 80.89 11.92
 0 -12 5 3.1 2.5
 0 12 5 -0.82 2.68
 0 -12 5 4.38 2.65
 0 12 5 2.01 3.06
 0 -12 6 15.32 4.89
 0 -12 6 20.39 3.74
 0 -12 6 25.25 6.59
 0 12 6 17.57 8.54
 0 12 6 28.08 7.89
 0 -12 7 0.66 2.11
 0 12 7 0.46 2.99
 0 -12 7 2.76 3.9
 0 12 7 -1.37 2.12
 0 -12 8 60.42 10.35
 0 -12 8 64.21 10.74
 0 12 8 61.66 13.5
 0 12 8 58.78 11.74
 0 -12 9 0.53 2.88
 0 12 9 5.09 6.33
 0 -12 9 3.53 2.81
 0 12 9 6.66 5.09
 0 -12 10 41.22 9.87
 0 12 10 50.74 13.09
 0 -12 10 34.44 8.36
 0 12 10 48.73 12.01
 0 -12 11 10.77 6.29
 0 12 11 19.99 9.09
 0 -12 11 17.43 6.31
 0 12 11 15.29 6.82
 0 12 12 48.63 12.89
 0 -12 12 70.52 14.04
 0 -12 12 47.48 11.02
 0 12 12 60.24 14.15
 0 -12 13 -3.95 4.48
 0 12 13 -1.51 3.24
 0 -12 13 3.58 5.35
 0 12 14 0.71 7.11
 0 -12 14 4.37 4.24
 0 14 -6 54.72 9.6
 0 14 -5 6.18 3.64
 0 14 -4 51.47 9.51
 0 14 -3 3.44 2.75
 0 14 -2 92.62 15.54
 0 14 -2 90.17 12.3
 0 14 -1 11.36 6.85
 0 14 -1 5.3 2.96
 0 14 0 124.91 18.59
 0 -14 0 99.26 11.97
 0 14 0 122.94 14.87
 0 14 1 -0.8 2.82
 0 -14 1 5.54 4.16
 0 14 1 8.47 4.28
 0 14 2 78.8 15.19
 0 -14 2 86.5 11.59
 0 14 2 86.6 12.86
 0 14 3 0.16 2.92
 0 -14 3 6.77 3.99
 0 14 3 7.43 5.37
 0 14 4 60.39 13.88
 0 -14 4 53.49 9.73
 0 14 4 58.84 11.22
 0 14 5 3.91 4.46
 0 -14 5 12.87 5.88
 0 14 5 7.24 3.84
 0 -14 6 45.11 9.19
 0 14 6 26.41 10.01
 0 14 6 59.8 12.05
 0 -14 7 11.72 5.34
 0 14 7 4.53 4.01
 0 14 7 5.7 5.41
 0 14 8 119.68 20.84
 0 -14 8 99.57 14.15
 0 14 8 87.22 15.16
 0 -14 9 11.28 6.4
 0 14 9 0.5 5.3
 0 -14 9 1.31 3.17
 0 14 9 0.08 3.32
 0 -14 10 9.05 5.6
 0 -14 10 1.36 2.61
 0 14 10 9.37 7.63
 0 14 10 -1.11 3.33
 0 14 11 18.42 7.96
 0 -14 11 28.43 8.82
 0 -16 -7 4.4 3.47
 0 -16 -6 27.02 6.68
 0 -16 -5 4.45 3.69
 0 -16 -4 45.1 8.77
 0 -16 -3 8.97 4.68
 0 16 -3 3.08 3.74
 0 -16 -2 35.91 8.19
 0 16 -2 40.74 9.17
 0 -16 -1 0.07 1.86
 0 16 -1 -0.94 2.5
 0 16 0 90.37 17.12
 0 -16 0 107.56 13.96
 0 16 0 116.03 15.54
 0 16 1 12.85 7.46
 0 -16 1 11.08 5.15
 0 16 1 10.62 5.36
 0 16 2 50.39 12.86
 0 -16 2 42.81 9.08
 0 16 2 55.58 11.03
 0 16 3 5.15 5.49
 0 -16 3 2.36 3.66
 0 16 3 -0.12 3.13
 0 -16 4 27.48 7.72
 0 16 4 45.98 12.43
 0 16 4 36.92 9.78
 0 16 5 0.29 7
 0 -16 5 11.28 6.12
 0 16 5 1.55 3.61
 0 16 6 43.19 12.93
 0 -16 6 26.11 8.1
 0 16 6 31.83 9.48
 0 16 7 3.75 4.48
 0 -16 7 4.29 4.07
 0 16 7 2.11 4.8
 0 16 8 39.87 11.44
 0 -18 -6 48.75 9.8
 0 -18 -5 1.93 3.85
 0 -18 -4 33.68 8.03
 0 -18 -3 5.69 4.52
 0 -18 -2 40.66 9.38
 0 -18 -1 4.69 4.38
 0 18 0 61.91 15.74
 0 -18 0 47.58 10.3
 0 -18 1 44.52 10.56
 0 18 1 4.45 4.39
 0 18 2 24.94 8.49
 0 18 3 14.6 7.46
 0 18 4 38.41 10.74
 0 18 5 -4.35 3.54
 0 18 6 33.85 10
 1 -1 -17 4.35 4.52
 1 1 -17 10.13 6.11
 1 1 -16 6.77 4.98
 1 -1 -16 0.22 2.92
 1 -1 -15 35.67 9.15
 1 1 -15 44.67 9.92
 1 -1 -14 7.01 4.91
 1 1 -14 2.55 2.8
 1 -1 -13 65.39 11.66
 1 1 -13 74.04 11.66
 1 -1 -12 0.64 1.36
 1 1 -12 0.87 1.6
 1 -1 -12 5.38 3.75
 1 1 -12 5.04 3.24
 1 1 -11 380.34 16.17
 1 -1 -11 374.6 15.15
 1 -1 -11 400.29 25.21
 1 1 -11 447.88 25.33
 1 1 -10 11.41 2.82
 1 -1 -10 4.31 1.69
 1 -1 -10 1.56 2.4
 1 1 -10 7.78 3.66
 1 -1 -9 20.25 3.44
 1 1 -9 19.37 3.48
 1 -1 -9 4.86 2.86
 1 1 -9 20.64 4.89
 1 1 -9 19.3 4.55
 1 -1 -8 3.98 1.72
 1 1 -8 1.95 1.29
 1 1 -8 1.63 1.95
 1 1 -8 3.26 2.15
 1 -1 -7 393.05 14.15
 1 1 -7 407.62 14.49
 1 1 -7 415.79 19.08
 1 -1 -7 426.43 20.34
 1 1 -7 431.72 17.97
 1 -1 -6 648.02 17.46
 1 1 -6 632.12 17.25
 1 1 -6 633.53 21.75
 1 -1 -6 660.94 24
 1 1 -6 659.45 20.28
 1 -1 -5 632.86 16.57
 1 1 -5 600.49 16.01
 1 1 -5 634.79 19.22
 1 -1 -5 588.83 20.92
 1 1 -5 603.06 17.73
 1 1 -4 2.53 1.19
 1 -1 -4 1.43 0.95
 1 1 -4 0.57 0.73
 1 -1 -4 1.95 1.67
 1 1 -4 2.94 1.3
 1 -1 -3 255.75 8.67
 1 -1 -3 250.91 9.01
 1 -1 -3 242.59 8.01
 1 1 -3 255.17 9.12
 1 -1 -3 239.31 10.93
 1 1 -3 267.04 8.76
 1 -1 -2 367.47 9.31
 1 1 -2 382.66 9.78
 1 1 -2 366.26 11.35
 1 -1 -2 360.27 10.25
 1 1 -2 375 10.11
 1 -1 -2 365.34 9.51
 1 1 -2 362.67 7.88
 1 1 2 76.51 5.51
 1 -1 2 79.85 5.38
 1 1 2 91.32 5.89
 1 -1 2 86.15 5.17
 1 -1 3 1284.19 24.99
 1 -1 3 1282.31 23.34
 1 1 3 1266.47 25.94
 1 -1 4 147.88 5.75
 1 -1 4 143.52 9.5
 1 1 4 152.97 10.17
 1 -1 4 135.98 8.57
 1 -1 5 30.56 2.86
 1 -1 5 28.96 4.95
 1 1 5 30.42 5.1
 1 -1 5 33.76 4.94
 1 -1 6 1.34 0.94
 1 -1 6 1.68 1.81
 1 -1 6 2.43 2.29
 1 1 6 3.47 2.34
 1 -1 7 207.9 8.97
 1 -1 7 195.13 14.73
 1 1 7 223.23 15.97
 1 -1 7 210 14.75
 1 -1 8 10.77 2.13
 1 -1 8 16.31 4.75
 1 1 8 10.03 4.23
 1 -1 9 191.93 9.86
 1 1 9 162.03 15.88
 1 -1 9 192.09 16.32
 1 -1 10 23.7 3.61
 1 1 10 20.17 5.5
 1 -1 10 29.36 7.28
 1 -1 11 641.23 19.67
 1 1 11 658.97 31.27
 1 1 11 636.01 34.88
 1 -1 11 604.46 32.68
 1 1 12 46.79 8.7
 1 -1 12 47.2 5.62
 1 1 12 21.51 7.03
 1 -1 12 46.53 9.95
 1 1 13 6.35 4.55
 1 1 13 8.97 4.72
 1 -1 13 13.15 6.44
 1 1 14 3.54 3.02
 1 1 14 6.22 5.51
 1 -1 14 0.87 3.97
 1 1 15 40.63 9.39
 1 -1 15 43.78 9.83
 1 1 15 21.68 8.26
 1 -1 15 49.74 11.9
 1 1 16 10.06 6.61
 1 -1 16 -0.96 3.75
 1 -1 17 17.73 8.53
 1 3 -17 7.06 5.78
 1 -3 -16 13.19 6.65
 1 3 -16 29.31 8.22
 1 -3 -15 31.3 8.61
 1 3 -15 45.91 9.75
 1 -3 -14 6.8 5.3
 1 3 -14 16.67 6.13
 1 -3 -13 83.03 13.58
 1 3 -13 75.07 11.15
 1 -3 -12 3.46 4.57
 1 3 -12 7.06 4.06
 1 -3 -11 172.3 10.29
 1 -3 -11 135.13 15.48
 1 3 -11 180.12 15.25
 1 -3 -10 0.83 0.79
 1 3 -10 4.72 2.63
 1 3 -10 3.93 3.12
 1 3 -10 1.57 1.86
 1 -3 -9 43.19 5.19
 1 3 -9 37.65 5.35
 1 3 -9 44.09 6.69
 1 3 -9 38.46 5.72
 1 -3 -8 15.5 3.14
 1 3 -8 14.55 3.21
 1 3 -8 18.48 4.28
 1 3 -8 16.08 3.31
 1 -3 -7 1289.49 27.33
 1 3 -7 1263.46 27.89
 1 3 -7 1327.59 30.85
 1 -3 -7 1255.54 39.14
 1 3 -7 1312.65 26.92
 1 3 -6 109.2 7.85
 1 -3 -6 117.82 9.44
 1 3 -6 116.2 8.26
 1 3 -6 115.96 7.18
 1 -3 -6 130.92 11.95
 1 -3 -5 1507.09 32.32
 1 3 -5 1572.92 28.22
 1 3 -5 1544 26.42
 1 -3 -5 1506.02 38.48
 1 3 -5 1586.95 22.35
 1 -3 -4 86.8 7.7
 1 3 -4 79.74 6.14
 1 3 -4 82.57 5.2
 1 -3 -4 85.49 8.44
 1 3 -4 78.89 4.05
 1 -3 -3 350.42 15.3
 1 3 -3 371.55 12.29
 1 -3 -3 347.16 9.5
 1 -3 -3 358 12.32
 1 3 -3 353.35 8.85
 1 3 -2 0.73 0.85
 1 3 -2 0.93 1.25
 1 -3 -2 1.72 0.86
 1 -3 -2 3.3 1.33
 1 3 -2 5.72 2.05
 1 -3 -2 2.22 1.57
 1 3 -2 1.67 0.59
 1 -3 -2 0.38 0.77
 1 -3 -2 0.88 1.13
 1 3 -2 1.02 0.46
 1 -3 -1 698.11 20.39
 1 3 -1 671.28 18.57
 1 3 -1 700.33 14.76
 1 -3 -1 728.83 10.47
 1 3 -1 733.01 12.27
 1 3 -1 672.6 14.42
 1 3 -1 704.33 11.16
 1 -3 -1 685.5 18.14
 1 -3 0 144.15 9.24
 1 3 0 149.39 9.35
 1 3 0 142.53 6.01
 1 3 0 150.06 4.8
 1 -3 0 148.47 7.06
 1 -3 0 162.38 8.63
 1 3 0 142.29 6.4
 1 3 1 814.42 22.56
 1 -3 1 723.96 16.07
 1 -3 1 752.06 19.36
 1 3 1 763.79 9.11
 1 3 1 768.75 17.89
 1 3 2 441.54 17.77
 1 -3 2 449.99 15.85
 1 -3 2 476.81 13.91
 1 3 2 485.73 16.37
 1 3 3 1583.64 34.79
 1 -3 3 1507.94 31.35
 1 -3 3 1552.16 28.28
 1 3 3 1630.68 33.77
 1 -3 3 1588.53 25.19
 1 3 4 219.95 13.69
 1 -3 4 232.32 13.3
 1 -3 4 227 12.06
 1 3 4 207.92 13.12
 1 -3 4 197.64 9.93
 1 3 5 185.3 13.32
 1 -3 5 218.73 9.88
 1 -3 5 238.67 15.19
 1 -3 5 207.21 12.83
 1 3 5 196.32 13.93
 1 -3 5 204.01 11.13
 1 -3 6 0.79 1.1
 1 3 6 2.37 2.3
 1 -3 6 2.18 2.06
 1 -3 6 2.76 2.21
 1 3 6 1.45 2.78
 1 -3 7 291.35 12.76
 1 3 7 272.2 17.86
 1 -3 7 272.52 17.38
 1 3 7 263.39 18.82
 1 -3 7 240.13 14.65
 1 3 8 0.57 1.84
 1 -3 8 1.6 1.31
 1 3 8 5.49 3.33
 1 -3 8 4.28 2.24
 1 3 9 195.86 16.79
 1 -3 9 221.47 12.5
 1 3 9 188.86 17.84
 1 -3 9 217.07 16.36
 1 3 10 8.75 4.4
 1 -3 10 5.24 2.42
 1 -3 10 5.16 3.36
 1 3 10 -1.72 2.97
 1 3 11 92.01 12.57
 1 -3 11 88.2 8.71
 1 3 11 73.28 12.65
 1 -3 11 89.56 12.27
 1 3 12 9.62 4.86
 1 -3 12 3.48 1.92
 1 3 12 4.21 4.22
 1 -3 12 2.59 3.36
 1 3 13 32.35 9.09
 1 3 13 25.93 8.04
 1 -3 13 37.17 8.91
 1 3 14 1.47 4.11
 1 3 14 7.95 5.43
 1 -3 14 10.56 5.89
 1 3 15 34.96 9.28
 1 3 15 19.22 8.45
 1 -3 15 26.64 8.96
 1 3 16 1.33 4.77
 1 -3 16 -3.15 5.27
 1 -3 17 38.63 11.47
 1 5 -17 1.86 2.58
 1 -5 -16 17.12 7.55
 1 5 -16 12.06 5.36
 1 -5 -15 97.77 16.53
 1 5 -15 90.31 12.82
 1 -5 -14 2.62 3.19
 1 5 -14 5.33 3.25
 1 -5 -13 70.8 12.83
 1 5 -13 47.98 8.56
 1 5 -12 0.16 2.01
 1 -5 -11 54.36 6.25
 1 5 -11 64.01 8.92
 1 -5 -10 82.51 7.86
 1 5 -10 88.96 9.56
 1 5 -10 87.72 8.11
 1 5 -9 43.87 5.32
 1 -5 -9 40.27 5.52
 1 5 -9 34.59 5.47
 1 5 -8 11.35 2.59
 1 -5 -8 12.73 4.19
 1 5 -8 15.78 3.68
 1 -5 -7 313.7 18.77
 1 5 -7 322.36 14.28
 1 5 -7 330.51 11.88
 1 -5 -6 104.02 10.84
 1 -5 -6 105.78 8.96
 1 5 -6 100.88 7.34
 1 -5 -5 358.84 20.02
 1 -5 -5 382.98 15.86
 1 5 -5 373.53 12.69
 1 -5 -5 388.76 21.66
 1 -5 -4 80.84 9.3
 1 -5 -4 73.52 6.43
 1 5 -4 75.02 5.22
 1 -5 -4 76.45 9.03
 1 5 -3 361.15 17.04
 1 -5 -3 333.43 18.73
 1 -5 -3 349.11 8.64
 1 5 -3 345.56 9.73
 1 5 -3 335.11 11.61
 1 -5 -3 310.15 12.44
 1 -5 -2 21.38 2.07
 1 -5 -2 16.84 4.2
 1 5 -2 17.94 4.08
 1 -5 -2 22.18 4.37
 1 5 -2 18.67 2.69
 1 5 -1 234.04 14.28
 1 -5 -1 219.71 14.63
 1 5 -1 235.07 9.28
 1 5 -1 237.4 9.85
 1 -5 -1 243.8 13.22
 1 5 0 5.86 2.56
 1 5 0 5.45 1.31
 1 -5 0 2.67 1.16
 1 -5 0 6.76 2.3
 1 5 0 5.02 1.72
 1 -5 1 176.1 13.04
 1 5 1 211.64 14.46
 1 -5 1 206.21 10.19
 1 -5 1 196.67 11.77
 1 5 1 196.69 10.8
 1 5 1 202.82 10.75
 1 -5 2 349.04 18.46
 1 5 2 343.03 19.04
 1 -5 2 358.17 16.46
 1 5 2 351.73 9.41
 1 -5 2 361.38 13.83
 1 5 2 361.78 16.34
 1 -5 3 1990.07 45.19
 1 5 3 1946.19 47.09
 1 -5 3 1960.02 39.81
 1 -5 3 2038.08 34.34
 1 5 3 1981.87 42.02
 1 5 4 158.76 13.92
 1 -5 4 137.17 11.11
 1 -5 4 139.56 9.88
 1 5 4 132.85 11.51
 1 -5 4 137.45 8.3
 1 5 5 138.18 13.51
 1 -5 5 142.56 9.45
 1 -5 5 131.48 11.63
 1 -5 5 133.32 10.45
 1 5 5 132.28 12.56
 1 -5 5 136.21 8.99
 1 -5 6 101.65 8.51
 1 5 6 87.63 11.21
 1 -5 6 120 11.95
 1 -5 6 86.07 9.17
 1 5 6 95.79 11.47
 1 -5 6 92.95 8.02
 1 5 7 482.04 26.93
 1 -5 7 524.87 19.87
 1 -5 7 522.99 26.88
 1 -5 7 506.69 23.82
 1 5 7 469.86 26.66
 1 -5 7 465.04 19.47
 1 5 8 17.9 5.89
 1 -5 8 26.09 4.86
 1 5 8 17.38 5.13
 1 -5 8 20.03 4.85
 1 5 9 124.03 14.75
 1 -5 9 128.54 10.76
 1 5 9 124.25 15.12
 1 -5 9 137.75 12.59
 1 5 10 44.24 9.29
 1 -5 10 64.55 8.08
 1 5 10 58.52 11.38
 1 -5 10 64.97 9.61
 1 5 11 6.83 5.37
 1 -5 11 8.41 3.16
 1 5 11 14.83 6.4
 1 5 12 3.23 3.54
 1 -5 12 6.17 2.99
 1 5 12 8.04 5.56
 1 -5 12 16.84 6.06
 1 5 13 58.56 12.07
 1 -5 13 65.21 9.12
 1 5 13 45.75 11.13
 1 -5 13 70.06 12.11
 1 5 14 3.02 4.61
 1 5 14 3.26 4.26
 1 -5 14 8.33 4.45
 1 5 15 3.75 3.99
 1 5 15 5.02 4.46
 1 -5 15 6.08 4.64
 1 -7 -16 13.14 6.38
 1 -7 -15 24.72 9.15
 1 7 -15 37.78 7.98
 1 -7 -14 -0.06 3.55
 1 -7 -14 -2.09 3.3
 1 7 -14 0.07 2.24
 1 -7 -13 55.56 10.17
 1 7 -13 50.78 8.54
 1 -7 -12 8.86 4.19
 1 7 -12 14.65 4.5
 1 -7 -11 41.05 7.93
 1 7 -11 32.42 6.04
 1 -7 -10 10.53 4.06
 1 7 -10 15.11 4.1
 1 7 -9 42.17 6.07
 1 -7 -9 54.2 7.95
 1 -7 -8 77.51 9
 1 7 -8 75.23 7.6
 1 -7 -7 259.2 15.34
 1 7 -7 266.05 13.16
 1 7 -6 63.57 6.1
 1 -7 -6 64.25 7.28
 1 -7 -5 424.11 25.48
 1 7 -5 405.82 14.1
 1 -7 -5 405.56 17.05
 1 -7 -4 7.49 3.67
 1 7 -4 24.21 5.29
 1 -7 -4 12.94 4.24
 1 7 -4 15.46 3.12
 1 7 -3 422.57 22.35
 1 -7 -3 444.29 25.4
 1 -7 -3 462.91 8.17
 1 7 -3 479.09 17.27
 1 -7 -2 -1.16 2.17
 1 -7 -2 4.04 0.81
 1 7 -2 5.93 3.37
 1 -7 -2 3.66 2.68
 1 7 -2 2.12 1.14
 1 7 -1 201.04 15.86
 1 -7 -1 213.03 17.23
 1 7 -1 182.06 10.83
 1 -7 -1 169.23 12.75
 1 -7 0 334.68 21.15
 1 7 0 355.14 21.27
 1 7 0 351.36 10.34
 1 7 0 355.49 15.64
 1 -7 0 328.1 17.5
 1 -7 1 547.98 27.19
 1 7 1 541.08 26.94
 1 7 1 505.98 11.49
 1 -7 1 545.29 19.1
 1 -7 1 533.17 22.43
 1 7 1 538.6 20.26
 1 -7 2 35.22 7.2
 1 7 2 29.97 6.44
 1 -7 2 40.18 5.37
 1 7 2 35.39 3.76
 1 7 2 37.79 5.75
 1 -7 2 35.51 5.97
 1 -7 3 530.32 27.24
 1 7 3 529.37 28.12
 1 7 3 533.43 14.94
 1 -7 3 522.57 23.23
 1 -7 3 498.28 18.96
 1 -7 4 143.15 14.49
 1 7 4 151.8 15.42
 1 -7 4 156.93 13.08
 1 -7 4 154.12 11.03
 1 7 4 156.98 13.82
 1 -7 5 257.21 19.51
 1 7 5 262.49 20.91
 1 -7 5 289.47 15.24
 1 -7 5 249.14 17.2
 1 -7 5 275.99 15.59
 1 7 5 266.87 19.05
 1 -7 5 287.85 13.28
 1 -7 6 3.57 2.01
 1 -7 6 2.13 2.32
 1 7 6 6.32 4.11
 1 -7 6 2.39 1.9
 1 7 6 2.39 2.02
 1 -7 6 1.19 2.37
 1 7 7 156.77 17.37
 1 -7 7 165.31 12.8
 1 7 7 155.75 16.46
 1 -7 7 182.08 12.21
 1 7 8 25.03 7.36
 1 -7 8 28.28 5.65
 1 7 8 23.22 7.48
 1 -7 8 26.14 5.17
 1 7 9 48.31 10.66
 1 7 9 44.17 5.81
 1 -7 9 48.87 7.54
 1 7 9 35.84 8.62
 1 -7 9 43.8 7.1
 1 7 10 24.17 7.99
 1 -7 10 27.86 5.72
 1 7 10 16.35 6.24
 1 -7 10 24.41 5.84
 1 7 11 23.85 7.98
 1 -7 11 47.91 8.35
 1 7 11 39.82 10.67
 1 -7 11 29.82 6.8
 1 7 12 26.39 8.53
 1 -7 12 33.06 7.03
 1 7 12 26.92 8.25
 1 -7 12 42.92 8.65
 1 7 13 30.55 10.09
 1 -7 13 28.43 6.68
 1 7 13 42.67 11.2
 1 -7 13 31.56 8.44
 1 7 14 1.55 4.17
 1 7 15 23.04 9.5
 1 -9 -14 4.43 4.33
 1 9 -13 34.78 6.77
 1 -9 -13 43.55 8.56
 1 9 -12 3.81 3.06
 1 -9 -12 0.24 2.11
 1 -9 -11 114.01 12.44
 1 9 -11 110.64 11.18
 1 9 -10 1.44 2.13
 1 -9 -10 6.38 3.46
 1 -9 -9 63.05 8.51
 1 9 -9 58.94 7.37
 1 -9 -8 28.58 5.57
 1 9 -8 16.93 3.91
 1 -9 -7 43.69 6.27
 1 9 -7 49 6.2
 1 9 -6 81.72 7.19
 1 9 -5 39.69 5.97
 1 9 -4 10.56 4.37
 1 9 -4 6.13 2.38
 1 9 -3 162.37 15.9
 1 9 -3 167.78 12.09
 1 9 -2 23.93 6.55
 1 9 -2 14.72 3.55
 1 9 -1 139.42 15.58
 1 9 -1 129.75 10.97
 1 -9 -1 131.04 12.78
 1 9 0 26.6 7.22
 1 -9 0 19.16 3.94
 1 9 0 17.27 4.05
 1 -9 0 19.27 5.02
 1 9 1 202.02 18.72
 1 -9 1 216.33 8.82
 1 -9 1 213.25 13.36
 1 -9 1 181.48 14.67
 1 9 1 215.38 14.82
 1 9 2 103.61 13.58
 1 9 2 111.98 4.75
 1 -9 2 112.25 9.78
 1 9 2 115.44 8.12
 1 -9 2 109.9 11.53
 1 9 2 107.01 10.85
 1 9 3 251.77 21.56
 1 -9 3 286.02 19.06
 1 9 3 268.17 12.33
 1 -9 3 276.64 15.4
 1 9 3 278.85 18.24
 1 9 4 -0.61 2.88
 1 -9 4 5.91 2.64
 1 9 4 8.35 3.49
 1 -9 4 6.14 2.96
 1 9 5 565.7 33.81
 1 -9 5 643.24 25.65
 1 9 5 637.21 30.48
 1 -9 5 612.05 20.38
 1 9 6 52.44 3.72
 1 9 6 43.84 10.13
 1 -9 6 59.49 8.13
 1 -9 6 53.89 6.44
 1 9 7 174.6 8.36
 1 9 7 163.46 19.53
 1 -9 7 176.51 14.47
 1 -9 7 162.48 11.6
 1 9 8 -0.16 3.06
 1 -9 8 0.49 1.63
 1 -9 8 3.93 2.53
 1 9 9 90.99 15.42
 1 -9 9 96.05 11.63
 1 -9 9 104.7 10.63
 1 9 10 6.17 5.38
 1 -9 10 -1.99 2.69
 1 -9 10 5.02 3.24
 1 9 11 151.28 20.77
 1 -9 11 145.1 14.97
 1 -9 11 143.52 13.93
 1 -9 12 6.87 4.24
 1 9 12 2.79 3.52
 1 -9 13 11.24 5.11
 1 9 13 25.93 9.13
 1 -9 14 7.42 5.44
 1 9 14 1.55 3.37
 1 9 15 14.86 7.63
 1 -11 -12 -0.12 2.1
 1 -11 -11 97.25 11.36
 1 11 -10 2.27 1.53
 1 11 -9 66.1 8.14
 1 11 -5 275.65 16.98
 1 11 -4 8.12 5.21
 1 11 -4 11.68 3.69
 1 11 -3 101.79 13.94
 1 11 -3 96.56 10.36
 1 11 -2 12.85 5.42
 1 11 -2 25.04 5.46
 1 11 -1 188.57 19.57
 1 11 -1 200.27 15.2
 1 11 0 49.82 10.56
 1 11 0 43.41 7.56
 1 11 1 187.04 20.12
 1 -11 1 192.87 7.56
 1 11 1 178.71 15.15
 1 11 2 36.05 9.18
 1 -11 2 24.39 3.72
 1 11 2 25.25 4.42
 1 11 2 26.48 5.98
 1 11 3 117.41 16.74
 1 -11 3 115.22 9.38
 1 11 3 101.08 12.09
 1 11 3 111.79 9.08
 1 11 4 41.77 2.68
 1 -11 4 65.46 7.96
 1 11 4 54.38 11.7
 1 11 4 45.98 5.91
 1 11 4 53.14 9.28
 1 -11 5 3.03 2.57
 1 11 5 2.4 4.62
 1 -11 5 9.98 4.5
 1 11 5 5.27 4.06
 1 -11 6 169.96 14.33
 1 11 6 159.44 20.3
 1 -11 6 172.96 15.2
 1 11 6 186.47 18.51
 1 -11 6 154.86 11.03
 1 -11 7 52.4 9.18
 1 11 7 35.53 9.5
 1 -11 7 44.12 6.15
 1 -11 7 49.56 8.55
 1 11 7 50.55 10.04
 1 -11 8 5.72 4.27
 1 11 8 0.54 3.85
 1 -11 8 0.37 2.46
 1 11 8 8.09 6
 1 -11 8 -1.56 1.25
 1 -11 9 82.63 12.85
 1 11 9 72.41 14.51
 1 -11 9 65.13 10.25
 1 11 9 84.21 14.46
 1 -11 9 80.3 9.22
 1 -11 10 0.15 2.84
 1 -11 10 6.2 5.28
 1 11 10 -0.61 4.51
 1 -11 11 82.14 12.29
 1 -11 11 59.6 11.9
 1 11 11 58.68 13.82
 1 -11 12 2.66 3.45
 1 -11 12 9.39 5.94
 1 11 12 7.79 4.87
 1 -11 13 7.4 4.69
 1 -11 13 10.45 6.03
 1 11 13 7.46 5
 1 11 14 0.8 3.39
 1 13 -5 82.66 10.14
 1 13 -4 8.93 3.53
 1 13 -3 90.79 14.83
 1 13 -3 89.1 10.95
 1 13 -2 9.88 4.57
 1 13 -2 22.46 5.61
 1 13 -1 198.48 22.59
 1 13 -1 170.86 15.9
 1 13 0 90.04 15.07
 1 13 0 61.09 9.7
 1 13 1 150.29 19.61
 1 13 1 168.31 16.16
 1 13 2 2.5 2.84
 1 13 2 3.78 3.19
 1 13 3 213.82 24.32
 1 -13 3 199.23 11.96
 1 13 3 177.39 17.93
 1 -13 4 24.02 4.71
 1 13 4 7.23 4.29
 1 -13 4 21.49 6.26
 1 13 4 18.35 6.13
 1 -13 5 -1.3 1.82
 1 13 5 5.45 3.66
 1 -13 5 7.24 3.96
 1 13 5 1.83 2.91
 1 -13 6 14.13 4.79
 1 -13 6 14.76 4.21
 1 13 6 18.02 7.64
 1 -13 6 17.09 6.06
 1 13 6 13.75 6.49
 1 -13 7 58.05 9.38
 1 13 7 69.26 14.72
 1 -13 7 55.13 10.11
 1 13 7 67.55 12.5
 1 -13 8 8.77 4.9
 1 13 8 0.41 4.27
 1 -13 8 7.3 4.9
 1 13 8 2.17 3.18
 1 -13 9 44.38 9.43
 1 13 9 20.86 8.18
 1 -13 9 34.02 8.6
 1 13 9 48.59 10.86
 1 -13 10 7.99 6.29
 1 13 10 22.37 10.01
 1 -13 10 8.82 5.2
 1 13 10 10.7 6.51
 1 13 11 16.4 8.81
 1 -13 11 32.2 9.23
 1 -13 11 15.64 5.69
 1 13 11 11.15 6.91
 1 -13 12 9.63 6.71
 1 13 12 0.85 3.37
 1 -13 12 6.64 4.63
 1 -13 13 12.33 6.76
 1 -13 13 12.24 6.15
 1 15 -3 80.66 15.05
 1 15 -3 80.18 11.11
 1 15 -2 -1.24 3.3
 1 15 -2 1.45 2.81
 1 15 -1 17.36 7.62
 1 15 -1 26.78 7.39
 1 15 0 -0.64 3.54
 1 15 0 8.78 4.8
 1 15 1 40.37 11.85
 1 15 1 41.78 9.02
 1 -15 2 23.73 6.86
 1 15 2 24.8 9.91
 1 15 2 13.42 5.56
 1 15 3 81.21 16.56
 1 -15 3 99.73 13.34
 1 15 3 94.03 14.14
 1 15 4 3.4 5.59
 1 -15 4 7 4.84
 1 15 4 -0.27 2.71
 1 15 5 20.03 8.96
 1 -15 5 30.72 8.29
 1 15 5 17.81 7.15
 1 15 6 5.32 4.55
 1 -15 6 12.62 6.02
 1 15 6 2.97 3.83
 1 15 7 34.18 11.22
 1 -15 7 55.87 11.13
 1 15 7 35.32 9.73
 1 -15 8 2.06 3.55
 1 15 8 -1.38 3.97
 1 15 9 37.58 13.13
 1 -15 9 32.24 8.85
 1 15 9 33.27 10.02
 1 17 -2 36.68 11.25
 1 -17 -1 17.5 6.05
 1 17 -1 3.53 4.56
 1 17 0 13.05 9.05
 1 -17 0 1.48 3.32
 1 17 1 38.67 12.32
 1 -17 1 45.79 9.74
 1 17 1 46.67 10.24
 1 17 2 22.22 10.01
 1 -17 2 8.18 4.75
 1 17 2 11.25 5.43
 1 17 3 63.63 16.2
 1 -17 3 40.7 9.67
 1 17 3 54.76 11.38
 1 17 4 13.15 7.76
 1 -17 4 12.37 5.98
 1 17 4 2.56 3.72
 1 17 5 41.95 10.58
 1 17 6 7.75 5.52
 1 17 7 38.87 11.19
 2 0 -17 -0.01 3.55
 2 0 -16 29.77 8.63
 2 0 -15 2.43 3.73
 2 0 -14 1.34 3.57
 2 0 -13 2.79 4.31
 2 0 -12 969.82 39.61
 2 0 -11 -1.88 2.07
 2 0 -11 4.83 3.43
 2 0 -10 153.94 10.99
 2 0 -10 154.75 14.83
 2 0 -9 3.51 2.04
 2 0 -9 1.16 1.85
 2 0 -9 1.14 2.77
 2 0 -8 85.9 7.85
 2 0 -8 79.49 9.02
 2 0 -7 0.51 1.22
 2 0 -7 0.16 1.39
 2 0 -6 18.44 3.51
 2 0 -6 14.42 3.62
 2 0 -5 0.59 1.5
 2 0 -5 0.32 0.83
 2 0 -5 0.21 0.86
 2 0 -4 638.06 17.71
 2 0 -4 710.61 21.22
 2 0 -4 659.26 19.03
 2 0 -3 -0.85 1.53
 2 0 -3 -1.82 1.38
 2 0 -3 -0.59 1
 2 0 -2 692.03 17.63
 2 0 -2 675.32 16.03
 2 0 -2 698.31 17.27
 2 0 -2 704.35 14.58
 2 0 -1 -0.13 0.41
 2 0 -1 0.47 0.72
 2 0 -1 0.94 0.76
 2 0 -1 0.73 0.62
 2 0 0 655.91 11.32
 2 0 0 661.33 15.13
 2 0 0 691.66 13.38
 2 0 1 1.09 1.14
 2 0 1 -0.13 0.72
 2 0 1 0.25 0.68
 2 0 2 791.55 19.43
 2 0 2 794.52 18.89
 2 0 3 -1.06 1.02
 2 0 3 -0.96 1.24
 2 0 4 391.12 17.21
 2 0 4 390.04 16.16
 2 0 5 1.37 0.64
 2 0 5 0.48 1.64
 2 0 5 -1.3 1.11
 2 0 6 60.95 3.23
 2 0 6 56.84 8
 2 0 6 57.56 7.64
 2 0 7 -0.54 0.4
 2 0 7 0.11 1.65
 2 0 8 25.87 2.44
 2 0 8 32.73 6.75
 2 0 9 -0.13 0.72
 2 0 9 5.61 4.15
 2 0 10 494.67 29.34
 2 0 11 1.6 2.26
 2 0 12 40.17 9.66
 2 0 13 2.72 3.45
 2 0 14 22.26 7.17
 2 0 14 10.81 5.34
 2 0 15 3.14 3.34
 2 0 15 4.92 6.45
 2 0 16 6.06 6.87
 2 2 -18 28.14 8.99
 2 -2 -17 -6.19 5.07
 2 2 -17 1.05 2.99
 2 -2 -16 47.59 10.8
 2 2 -16 27.04 8.37
 2 -2 -15 6.04 5.31
 2 2 -15 0.69 3.12
 2 -2 -14 5.9 4.55
 2 2 -14 10.14 5.71
 2 -2 -13 25.83 7.39
 2 2 -13 20.47 5.75
 2 -2 -12 182.71 12.4
 2 -2 -12 207.83 19.23
 2 2 -12 218.45 17.9
 2 -2 -11 30.56 5.2
 2 2 -11 35.02 7.11
 2 2 -10 151.06 11.16
 2 -2 -10 151.2 11.17
 2 2 -10 170.77 14.17
 2 2 -10 157.57 12.38
 2 -2 -9 0.06 1.24
 2 2 -9 1.37 0.97
 2 2 -9 1.6 1.64
 2 2 -9 4.29 2.72
 2 -2 -8 268.84 14.3
 2 2 -8 277.85 14.34
 2 2 -8 273.21 15.49
 2 2 -8 302.29 15.11
 2 -2 -7 8.73 2.53
 2 2 -7 10.16 2.81
 2 2 -7 9.16 2.85
 2 2 -7 5.6 2.28
 2 -2 -7 17 4.51
 2 2 -6 4.8 1.99
 2 -2 -6 4.77 1.89
 2 -2 -6 3.25 1.38
 2 2 -6 3.2 1.62
 2 -2 -6 0.11 2.02
 2 2 -6 5.06 1.84
 2 -2 -5 64.33 6.28
 2 -2 -5 67.33 5.75
 2 2 -5 57.91 5.92
 2 -2 -5 59.11 5.54
 2 2 -5 60.48 5.33
 2 2 -5 58.81 5.16
 2 -2 -5 75.66 8.22
 2 2 -4 1627.61 28.55
 2 -2 -4 1576.25 26.6
 2 -2 -4 1531.31 29.69
 2 2 -4 1600.12 33.4
 2 -2 -4 1623.71 28.13
 2 2 -4 1547.13 28.71
 2 2 -4 1517.97 22.92
 2 -2 -3 145.9 8.29
 2 2 -3 147.82 6.26
 2 2 -3 160.87 8.8
 2 -2 -3 154.79 8.48
 2 -2 -3 141.5 7.62
 2 -2 -3 160.71 8.69
 2 2 -3 165.1 8.45
 2 2 -3 164.42 9.92
 2 -2 -2 646.82 17.49
 2 2 -2 682.67 15.15
 2 2 -2 623.14 16.21
 2 -2 -2 644.83 16.14
 2 2 -2 647.44 15.67
 2 2 -2 624.17 17.58
 2 -2 -2 655.1 18.48
 2 -2 -2 636.02 15.94
 2 2 -1 630.42 15.29
 2 2 -1 627.53 15.84
 2 2 -1 608.88 14.49
 2 2 -1 601.69 16.74
 2 -2 -1 600.97 17.5
 2 -2 -1 601.05 14.36
 2 2 -1 616.08 10.72
 2 2 0 140.13 6.65
 2 2 0 174.69 9.27
 2 -2 0 164.06 7.87
 2 -2 0 153.02 9.07
 2 2 0 151.24 5.96
 2 2 0 150.23 6.47
 2 2 1 16.64 2.09
 2 2 1 23.65 3.97
 2 -2 1 17.3 2.84
 2 2 1 17.32 2.64
 2 -2 1 16.07 3.07
 2 2 1 17.34 2.77
 2 2 2 163.77 5.47
 2 -2 2 152.15 9.9
 2 2 2 139.45 8.43
 2 -2 2 156.04 8.98
 2 2 2 142.92 8.66
 2 -2 2 165.62 8.81
 2 -2 3 3.05 1.93
 2 2 3 1.96 0.54
 2 -2 3 1.34 1.52
 2 -2 3 4.8 2.29
 2 2 3 4.55 2.16
 2 -2 4 1412.19 35.42
 2 -2 4 1430.7 32.86
 2 2 4 1403.61 33.11
 2 -2 4 1409.77 30.06
 2 -2 5 577.3 23.17
 2 2 5 575.74 23.2
 2 -2 5 574.32 20.75
 2 -2 6 802.76 17.34
 2 -2 6 800.45 29.57
 2 2 6 800.49 29.78
 2 -2 6 783.72 26.36
 2 -2 7 10.24 2.21
 2 -2 7 11.49 3.94
 2 2 7 13.92 4.73
 2 -2 8 9.8 2.25
 2 -2 8 7.63 3.07
 2 2 8 14.83 5.08
 2 2 9 6.42 4.38
 2 -2 9 0.91 1.3
 2 -2 9 -1.21 2.21
 2 2 9 7.47 4.48
 2 -2 10 215.05 11.18
 2 2 10 211.27 18.54
 2 2 10 208.84 19.83
 2 -2 10 215.5 18.58
 2 2 11 11.29 5.51
 2 -2 11 9.28 2.66
 2 2 11 7.56 4.71
 2 -2 11 13.46 5.54
 2 2 12 78.17 12.4
 2 2 12 80.2 13.34
 2 -2 12 82.71 12.97
 2 2 13 2.73 4.06
 2 2 13 1.7 2.83
 2 -2 13 3.81 4.49
 2 2 14 48.69 10.94
 2 2 14 52.88 12.72
 2 -2 14 40.28 10.33
 2 2 15 8.63 5.93
 2 2 15 8.23 6.08
 2 -2 15 9.72 5.76
 2 -2 16 2.58 3.12
 2 2 16 4.95 6.09
 2 4 -17 7.98 5.69
 2 -4 -16 9.79 6.72
 2 4 -16 10.94 5.04
 2 -4 -15 2.29 4.13
 2 4 -15 3.17 3.67
 2 -4 -14 87.56 14.54
 2 4 -14 81.76 11.65
 2 -4 -13 -4.73 3.96
 2 4 -13 1.19 2.97
 2 4 -12 60.48 8.95
 2 -4 -11 20.02 4.25
 2 4 -11 16.38 3.97
 2 4 -11 29.65 5.85
 2 -4 -10 272.46 15.82
 2 4 -10 268.87 16.56
 2 4 -10 274.3 14.36
 2 -4 -9 1.77 1.9
 2 4 -9 0.12 1.31
 2 -4 -8 327.07 16.53
 2 -4 -8 369.55 18.52
 2 4 -8 374.91 16.38
 2 4 -8 357.6 13.73
 2 4 -7 86.38 8.19
 2 -4 -7 91 9.12
 2 4 -7 94.28 7.43
 2 4 -7 96.77 6.22
 2 4 -6 14.08 3.12
 2 -4 -6 15.63 3.75
 2 4 -6 13.42 2.53
 2 -4 -6 15.58 4.57
 2 4 -6 16.27 2.26
 2 -4 -5 386.75 18.88
 2 4 -5 376.63 15.81
 2 -4 -5 383.38 13.46
 2 -4 -5 346.07 15.57
 2 4 -5 387.97 11.05
 2 -4 -5 387.18 20.75
 2 4 -5 372.29 8.05
 2 4 -4 1364.41 27.84
 2 -4 -4 1353 34.59
 2 4 -4 1336.54 28.53
 2 -4 -4 1323.75 23.79
 2 4 -4 1276.42 30.69
 2 -4 -4 1289.9 24.98
 2 -4 -4 1367.61 29.38
 2 4 -4 1362.44 16.32
 2 4 -3 7.2 2.28
 2 4 -3 8.45 2.51
 2 4 -3 8.59 2.55
 2 -4 -3 5.39 1.73
 2 -4 -3 4.72 1.81
 2 -4 -3 5.89 1.57
 2 4 -3 9.86 2.45
 2 -4 -3 5.5 2.04
 2 -4 -3 7.71 2.95
 2 -4 -2 17.47 4.01
 2 4 -2 14.09 2.69
 2 4 -2 15.81 2.64
 2 4 -2 16 3.49
 2 -4 -2 16.77 2.5
 2 4 -2 12.54 2.58
 2 -4 -2 16 2.99
 2 -4 -2 20.75 4.1
 2 4 -1 -0.06 0.87
 2 4 -1 0.27 0.85
 2 4 -1 1.75 1.63
 2 -4 -1 1.61 1.87
 2 4 -1 1.25 1.21
 2 -4 -1 2.03 1.48
 2 4 -1 -0.09 0.51
 2 4 -1 1.65 0.82
 2 -4 0 397.59 18.41
 2 4 0 398.52 18.22
 2 4 0 402.21 12.58
 2 4 0 380.01 10.83
 2 -4 0 383.27 14.27
 2 -4 0 385.06 16.93
 2 4 0 383.17 12.38
 2 4 1 22 2.92
 2 4 1 24.15 4.6
 2 -4 1 21.73 3.54
 2 -4 1 16.33 3.7
 2 4 1 18.9 3.37
 2 4 2 226.36 14.77
 2 -4 2 193.13 10.89
 2 -4 2 188.29 12.49
 2 4 2 215.85 11.98
 2 4 3 7.47 3.3
 2 -4 3 10.57 2.95
 2 -4 3 12.42 3.65
 2 4 3 11.03 3.36
 2 4 4 556.1 25.08
 2 -4 4 557.4 23.81
 2 -4 4 585.08 21.72
 2 4 4 612.41 24.39
 2 -4 4 586.95 19.6
 2 -4 5 41.79 5.63
 2 4 5 39.83 7.44
 2 -4 5 39.58 6.39
 2 -4 5 43.1 7.22
 2 4 5 35.71 6.3
 2 4 6 809.04 32.86
 2 -4 6 843.04 33.64
 2 -4 6 804.12 29.51
 2 4 6 842.84 32.67
 2 -4 6 791.37 25.79
 2 4 7 35.41 7.5
 2 -4 7 35.96 4.93
 2 -4 7 38.37 6.36
 2 4 7 39.36 7.64
 2 4 8 89.73 12.22
 2 -4 8 103.84 8.45
 2 4 8 92.12 12.41
 2 -4 8 114.31 11.34
 2 4 9 6.14 4.76
 2 -4 9 8.54 2.92
 2 4 9 5.41 5.37
 2 -4 9 0.93 2.01
 2 -4 10 186.66 12.35
 2 4 10 177.42 18.17
 2 4 10 145.77 17.32
 2 -4 10 167.28 15.74
 2 4 11 4.84 4.31
 2 -4 11 3.64 2.32
 2 -4 11 8.1 4.65
 2 4 11 -5.51 4.65
 2 4 12 23.13 7.85
 2 -4 12 48.74 6.88
 2 -4 12 49.53 9.95
 2 4 12 55.83 11.97
 2 4 13 11.41 5.57
 2 4 13 -0.67 4.49
 2 -4 13 9.22 5.42
 2 4 14 26.51 8.69
 2 4 14 50.42 13.02
 2 -4 14 42.27 10.31
 2 4 15 22.16 8.65
 2 4 15 24.24 9.65
 2 -4 15 43.37 10.92
 2 4 16 -3.57 5.03
 2 -4 16 3.75 5.14
 2 -4 17 6.96 6.49
 2 -6 -15 -5.35 5.85
 2 6 -15 3.14 2.82
 2 6 -14 38.94 7.57
 2 6 -13 6.98 3.63
 2 6 -12 0.35 1.87
 2 -6 -11 3.13 2.26
 2 6 -11 1.49 1.98
 2 6 -10 17.9 3.3
 2 -6 -10 19.87 4.59
 2 -6 -10 24.02 5.88
 2 6 -10 18.9 4.27
 2 6 -9 1.42 1.13
 2 -6 -9 2.48 2.69
 2 6 -9 -0.57 2.01
 2 -6 -8 171.63 15.27
 2 -6 -8 178.3 13.94
 2 6 -8 180.13 10.52
 2 -6 -7 3.96 2.72
 2 6 -7 4.21 1.63
 2 -6 -7 -0.8 2.58
 2 -6 -6 333.76 21.14
 2 -6 -6 344.08 17.23
 2 6 -6 316.54 11.33
 2 6 -5 18.81 3.98
 2 6 -5 22.94 2.8
 2 -6 -5 15.56 3.56
 2 -6 -5 17.74 2.79
 2 -6 -5 22.12 5.53
 2 6 -4 1727.56 40.03
 2 -6 -4 1682.53 46.39
 2 6 -4 1678.32 34.63
 2 -6 -4 1672.3 25.59
 2 -6 -4 1648.32 34.46
 2 6 -3 131.88 11.41
 2 -6 -3 126.69 12.53
 2 6 -3 154.99 10.23
 2 -6 -3 131.54 7.04
 2 -6 -3 135.03 6.61
 2 6 -3 133.5 9.7
 2 6 -3 140.73 6.66
 2 -6 -3 144.47 12.51
 2 -6 -2 680.63 28.95
 2 6 -2 677.39 26.72
 2 6 -2 644.82 19.95
 2 -6 -2 673.09 13.68
 2 6 -2 669.09 15.3
 2 -6 -2 631.63 25.17
 2 -6 -1 87.02 10.4
 2 6 -1 94.18 9.97
 2 6 -1 72.09 6.22
 2 6 -1 81.53 5.18
 2 -6 -1 77.03 8.68
 2 6 -1 74.74 5.62
 2 -6 0 478.15 24.22
 2 6 0 506.57 24.23
 2 6 0 465.13 15.28
 2 6 0 506.2 11.73
 2 -6 0 480.4 18.35
 2 -6 0 516.7 22.51
 2 6 0 509.62 16.28
 2 6 0 479.58 16.41
 2 -6 1 12 4.11
 2 6 1 15.31 4.48
 2 6 1 14.41 1.97
 2 -6 1 14.08 3.32
 2 6 1 10.69 2.9
 2 -6 1 13.6 3.98
 2 -6 2 631.61 28.51
 2 6 2 687.52 29.64
 2 6 2 611.26 11.51
 2 -6 2 633.82 25.8
 2 -6 2 633.39 21.68
 2 6 2 614.97 23.08
 2 -6 3 26.04 5.72
 2 6 3 30.35 6.63
 2 -6 3 32.79 5.35
 2 6 3 39.6 6.37
 2 -6 3 41.47 7.02
 2 6 4 557.99 28.88
 2 -6 4 509.39 21.27
 2 -6 4 511.19 24.91
 2 6 4 525.16 24.8
 2 -6 4 528.74 19.22
 2 -6 5 47.35 6.12
 2 6 5 37.78 8.17
 2 -6 5 52.37 7.22
 2 6 5 39.14 7.34
 2 -6 5 49.03 8.1
 2 6 6 156.72 16.42
 2 6 6 196.54 16.98
 2 -6 6 154.14 11.6
 2 6 7 31.3 7.86
 2 -6 7 26.02 4.85
 2 6 7 27.19 6.73
 2 -6 7 34.55 5.85
 2 6 8 4.02 3
 2 -6 8 7.74 2.93
 2 -6 8 3.09 2.32
 2 6 8 3.98 3.52
 2 6 9 20.6 6.96
 2 -6 9 32.16 5.68
 2 -6 9 19.36 5.37
 2 6 9 16.9 5.51
 2 6 10 1.19 3.61
 2 -6 10 3.44 2.45
 2 6 10 8.5 5.29
 2 -6 10 5.76 3.26
 2 6 11 5.64 4.29
 2 -6 11 4.91 3.03
 2 6 11 -1.3 4.09
 2 -6 11 6.65 3.56
 2 6 12 25.85 8.32
 2 -6 12 44.35 7.31
 2 -6 12 37.54 8.8
 2 6 12 30.96 9.37
 2 6 13 3.21 6.1
 2 6 13 2 3.58
 2 -6 13 5.48 4.89
 2 6 14 60.18 13.42
 2 6 14 55.32 13.61
 2 -6 14 68.66 12.68
 2 6 15 0.15 5.02
 2 -6 15 -0.52 4.56
 2 6 16 37.23 11.25
 2 -8 -16 22.44 8.18
 2 -8 -15 9.22 4.21
 2 -8 -14 19.32 6.22
 2 8 -13 18.11 5.23
 2 -8 -13 16.14 5.6
 2 -8 -12 164.16 16.64
 2 8 -12 142.97 12.61
 2 8 -11 23.53 4.92
 2 -8 -11 19.38 5.47
 2 -8 -10 116.94 12.83
 2 8 -10 106.26 9.45
 2 8 -9 21.28 4.12
 2 -8 -9 20.66 5.67
 2 8 -8 197.73 11.25
 2 -8 -8 175.57 14.32
 2 -8 -7 3.67 2.82
 2 8 -7 0.72 0.89
 2 8 -6 382.83 13.05
 2 -8 -6 399.96 19.49
 2 8 -5 6.25 3.05
 2 -8 -5 3.58 1.46
 2 8 -4 136.56 13.48
 2 8 -4 140.72 8.65
 2 -8 -4 126.83 6.49
 2 8 -3 80.71 10.37
 2 8 -3 80.54 6.65
 2 -8 -3 70.3 4.97
 2 8 -2 187.87 16.39
 2 8 -2 180.79 10.79
 2 8 -2 185.02 10.51
 2 8 -1 171.55 15.76
 2 -8 -1 170.32 6.07
 2 8 -1 174.35 10.05
 2 8 -1 187.76 11.09
 2 -8 -1 181.42 14.94
 2 8 0 59.17 5.54
 2 8 0 62.68 9.63
 2 -8 0 75.02 8.22
 2 8 0 68.18 7.09
 2 -8 0 71.95 9.35
 2 8 1 11.56 4.66
 2 8 1 11.7 1.47
 2 8 1 14.29 2.85
 2 -8 1 12.83 3.38
 2 -8 1 10.3 3.83
 2 8 1 10.43 3
 2 8 2 172.25 16.96
 2 8 2 149.14 4.61
 2 8 2 159.68 7.7
 2 -8 2 159.11 14.51
 2 -8 2 175.11 12.6
 2 8 2 181.17 13.05
 2 8 3 14.13 5.73
 2 8 3 11.54 3.5
 2 8 4 145.88 16.52
 2 8 4 137.67 13.77
 2 8 5 21.12 6.98
 2 -8 5 22.19 4.24
 2 8 5 18.67 5.11
 2 8 6 104.31 14.87
 2 8 6 103.69 13.2
 2 -8 6 116.42 10.29
 2 8 7 -1.64 3.05
 2 -8 7 2.29 2.02
 2 -8 7 1.48 1.87
 2 8 7 1.39 2.94
 2 8 8 131.74 17.63
 2 -8 8 131.46 12.3
 2 8 8 151.89 17.77
 2 -8 8 137.82 12.22
 2 8 9 7.63 5.79
 2 -8 9 9.99 4.64
 2 8 9 3.75 3.84
 2 -8 9 9.67 3.74
 2 8 10 85.83 15.55
 2 -8 10 92.99 11.07
 2 8 10 92.84 15.23
 2 -8 10 111.71 12.58
 2 -8 11 8.99 3.55
 2 8 11 2.52 4.34
 2 -8 11 7.27 3.48
 2 8 12 45.07 12.12
 2 -8 12 38.12 7.57
 2 8 12 23.9 8.75
 2 -8 12 42.32 8.75
 2 8 13 5.13 5.23
 2 8 13 5.46 4.48
 2 -8 13 3.85 5.61
 2 8 14 19.38 8.06
 2 8 15 1.87 5.69
 2 8 16 29.99 12.16
 2 -10 -14 19.96 6.15
 2 -10 -13 -2.1 2.25
 2 -10 -12 132.42 14.8
 2 -10 -11 3.43 3.29
 2 -10 -10 54.87 8.91
 2 10 -10 66.1 7.65
 2 -10 -9 2.24 1.94
 2 10 -9 3.31 1.52
 2 10 -8 96.51 8.11
 2 -10 -8 94.17 10.71
 2 10 -5 76.43 11.05
 2 10 -4 246.82 20.4
 2 -10 -4 226.02 7.1
 2 10 -4 218.54 12.69
 2 -10 -3 17.34 2.19
 2 10 -3 19.06 6.25
 2 10 -3 17.01 3.71
 2 10 -2 196.12 18.96
 2 10 -2 166.98 11.82
 2 10 -1 1 2.4
 2 10 -1 0.26 1.73
 2 10 0 99.44 13.92
 2 10 0 99.82 7.01
 2 10 0 85.61 9.16
 2 10 1 2.08 1.12
 2 10 1 5.57 4.07
 2 10 1 7.25 3.28
 2 10 2 110.52 7.14
 2 10 2 85.52 13.43
 2 10 2 109.28 7.65
 2 10 2 102.44 10.99
 2 10 3 10.93 5.88
 2 10 3 4.3 1.68
 2 10 3 7.49 2.07
 2 10 3 11.42 4.24
 2 10 4 116.37 16.36
 2 10 4 161.26 15.03
 2 10 5 332.81 27.75
 2 10 6 63.74 12.59
 2 -10 6 69.04 8.07
 2 10 7 11.48 6.88
 2 -10 7 7.57 3.34
 2 -10 7 24.03 5.92
 2 10 8 32.98 9.73
 2 -10 8 32.34 6.23
 2 -10 8 36.51 7.33
 2 -10 9 8.75 4.39
 2 -10 9 4.25 3.17
 2 10 10 93.19 16.97
 2 -10 10 90.68 12.17
 2 -10 10 109.81 12.29
 2 10 11 -2.63 2.99
 2 -10 11 1.5 2.11
 2 -10 11 2.25 3.88
 2 10 12 17 7.87
 2 -10 12 37.38 8.11
 2 10 13 -0.38 3.86
 2 10 14 33.46 11.45
 2 12 -5 6.26 4.9
 2 12 -5 4.22 2.1
 2 12 -4 123.09 15.98
 2 12 -4 128.22 11.12
 2 12 -3 13.54 6.17
 2 12 -3 21.28 4.83
 2 12 -2 287.76 25.22
 2 -12 -2 225.47 7.83
 2 12 -2 244.48 16.21
 2 12 -1 -0.39 3.09
 2 12 -1 -1.13 1.27
 2 12 0 348.75 28.96
 2 12 0 371.98 21.4
 2 -12 1 0.48 0.94
 2 12 1 5.32 4.97
 2 12 1 1.65 2.45
 2 12 2 167.18 20.66
 2 12 2 118.71 5.64
 2 -12 2 151.44 9.54
 2 12 2 134.34 9.77
 2 12 2 134.47 13.79
 2 12 3 7.82 5.5
 2 12 3 7.73 2.42
 2 12 3 6.64 3.82
 2 12 4 257.98 25.94
 2 12 4 227.07 19.48
 2 12 5 40.16 10.95
 2 12 5 45.71 9.3
 2 12 6 188.42 23.28
 2 -12 6 232.77 18.66
 2 12 6 213.25 20.86
 2 -12 6 200.55 14.52
 2 12 7 33.64 10.59
 2 -12 7 62.99 8.45
 2 -12 7 48.67 8.81
 2 12 7 54.11 11.09
 2 12 8 17.65 8.61
 2 -12 8 19.44 4.97
 2 -12 8 14.74 5.56
 2 12 8 29.54 9.32
 2 12 9 -2.55 4.77
 2 -12 9 0.32 2.13
 2 12 9 4.22 3.56
 2 12 10 37.63 11.71
 2 -12 10 37.09 8.74
 2 12 11 3.77 5
 2 -12 11 2.21 3.17
 2 -12 12 18.79 7.47
 2 12 12 3.32 4.15
 2 -12 12 13.33 5.23
 2 -12 13 4.66 5.85
 2 14 -4 191.13 21.84
 2 14 -3 -1.76 5.25
 2 14 -3 4.56 3.12
 2 14 -2 29.35 9.07
 2 14 -2 19.23 5.24
 2 14 -1 46.44 11.72
 2 14 -1 52.08 8.53
 2 14 0 28.46 9.1
 2 14 0 22.1 5.83
 2 14 1 16.08 7.38
 2 14 1 9.06 4.18
 2 14 2 53.33 12.85
 2 14 2 60.2 10.12
 2 14 3 0.9 4.67
 2 14 3 4.91 3.33
 2 14 4 89.3 16.86
 2 14 4 73.57 12.21
 2 14 5 1.69 3.3
 2 -14 5 9.65 4.86
 2 14 5 10.84 5.42
 2 14 6 58.53 14.23
 2 -14 6 68.07 11.42
 2 14 6 47.42 10.54
 2 14 7 1.22 6.14
 2 -14 7 7.47 4.8
 2 14 7 3.96 3.59
 2 14 8 22.34 9.69
 2 -14 8 40.28 9.4
 2 14 8 45.9 10.97
 2 14 9 13.82 8.01
 2 -14 9 0.82 3.65
 2 14 9 8.48 7.2
 2 -14 10 39.19 9.88
 2 14 10 36.18 11.06
 2 -14 11 -1.61 4.2
 2 16 -4 49.39 12.48
 2 16 -3 18.11 7.66
 2 16 -2 54.29 12.82
 2 16 -1 5.26 3.32
 2 16 0 23.24 7.75
 2 16 1 14.87 8.26
 2 16 1 1.28 3.63
 2 16 2 31.68 11.32
 2 16 2 38.65 9.16
 2 -16 3 -1.2 2.4
 2 16 3 -0.71 5.15
 2 16 3 0.7 3.38
 2 16 4 54.12 14.55
 2 -16 4 51.84 10.64
 2 16 4 63.94 12.09
 2 16 5 3.7 6.59
 2 -16 5 4.2 4.72
 2 16 5 0.41 2.63
 2 16 6 50.66 13.94
 2 -16 6 39.81 9.91
 2 16 6 37.54 9.47
 2 -16 7 -1.54 3.6
 2 16 7 -0.46 2.55
 2 16 8 20.97 7.99
 2 18 -3 -1.68 4.37
 2 18 -2 45.46 12.99
 2 18 -1 0.94 5.55
 3 1 -18 -2.95 4.2
 3 -1 -17 22.38 8.19
 3 1 -17 6.44 4.57
 3 -1 -16 3.58 4.52
 3 1 -16 2.08 3.59
 3 -1 -15 71.49 12.84
 3 1 -15 50.89 10.33
 3 -1 -14 6.01 4.12
 3 1 -14 16.94 5.95
 3 -1 -13 2.36 3.21
 3 1 -13 2.28 3.99
 3 -1 -12 129.49 14.75
 3 1 -12 118.09 13.56
 3 1 -11 80.06 10.51
 3 -1 -10 4.62 2.72
 3 1 -10 5.34 3.56
 3 -1 -9 264.63 16.12
 3 1 -9 282.85 16.37
 3 1 -9 322.61 18.22
 3 -1 -8 30.98 5.29
 3 1 -8 37.8 5.8
 3 -1 -8 34.78 6.46
 3 1 -8 30.42 5.3
 3 -1 -7 175.58 11.62
 3 1 -7 159.45 11.23
 3 -1 -7 155.93 11.63
 3 1 -7 162.13 11.8
 3 -1 -7 180.06 13.98
 3 1 -7 165.74 11.78
 3 1 -6 57.32 7.64
 3 -1 -6 54.02 6.18
 3 1 -6 48.45 6.15
 3 -1 -6 62.82 7.73
 3 -1 -6 53.69 6.7
 3 1 -6 54.67 6.77
 3 -1 -6 53.98 3.84
 3 1 -6 52.33 6.25
 3 -1 -6 48.83 6.73
 3 -1 -5 209.99 11.84
 3 1 -5 220.87 12
 3 1 -5 227.25 14.34
 3 -1 -5 223.52 13.7
 3 -1 -5 228.92 8.56
 3 -1 -5 211.92 12.73
 3 1 -5 229.97 13.25
 3 -1 -4 10.53 2.82
 3 1 -4 8.08 2.95
 3 1 -4 7.67 2.25
 3 -1 -4 0.63 1.07
 3 1 -4 2.87 1.82
 3 -1 -4 6.24 2.15
 3 -1 -4 4.36 1.44
 3 1 -3 92.03 8.03
 3 -1 -3 81.12 7.42
 3 -1 -3 90.47 7.22
 3 1 -3 93.75 7.27
 3 -1 -3 86.18 7.67
 3 1 -3 86.31 7.48
 3 -1 -3 87.54 7.05
 3 1 -3 87.67 5.44
 3 1 -2 2328.07 37.04
 3 1 -2 2260.21 23.12
 3 1 -2 2272.52 27.29
 3 -1 -2 2276.02 32.34
 3 -1 -2 2245.19 34.91
 3 1 -2 2300.81 35.35
 3 -1 -2 2316.2 38.31
 3 1 -2 2203.86 39
 3 1 -1 9730.58 72.02
 3 -1 -1 9999 63.31
 3 -1 -1 9781.52 61.69
 3 -1 -1 9894.89 75
 3 1 -1 9618.02 60.88
 3 1 -1 9690.01 51.75
 3 1 0 3644.7 41.3
 3 1 0 3541.38 39.73
 3 1 0 3568.71 29.21
 3 1 0 3751.13 36.66
 3 -1 0 3548.38 46.54
 3 -1 0 3734.67 40.65
 3 1 0 3822.02 40.25
 3 1 1 28.1 3.8
 3 1 1 34.25 3.77
 3 1 1 33.39 4.03
 3 -1 1 28.92 3.94
 3 1 1 28.39 3.91
 3 -1 1 23.2 3.98
 3 1 2 39.91 5.06
 3 -1 2 39.96 4.93
 3 1 2 33.14 3.51
 3 -1 2 37.69 4.89
 3 1 2 42.81 5.2
 3 -1 2 30.2 4.76
 3 1 3 399.12 11.03
 3 -1 3 357.88 17.77
 3 1 3 372.05 16.83
 3 -1 3 404.84 17.45
 3 1 3 413.22 17.12
 3 -1 3 378.38 16.11
 3 1 4 79.29 4.43
 3 1 4 89.36 8.94
 3 -1 4 94.84 9.3
 3 1 4 85.8 8.44
 3 -1 4 78.04 7.88
 3 1 5 149.33 4.93
 3 1 5 153.87 12.76
 3 -1 5 147.24 12.64
 3 1 5 139.52 11.56
 3 -1 5 166.86 12.3
 3 -1 6 33.05 6.07
 3 1 6 25.13 5.62
 3 -1 7 301.03 9.56
 3 1 7 288.59 19.17
 3 -1 7 252.51 17.57
 3 -1 8 7.46 1.63
 3 1 8 6.21 3.34
 3 -1 8 8.17 4.8
 3 -1 9 74.09 5.07
 3 1 9 76.72 11.62
 3 -1 9 84.68 11.77
 3 -1 10 138.84 6.75
 3 1 10 143.34 16.65
 3 -1 10 138.52 15.54
 3 -1 11 10.34 5.6
 3 1 11 15.34 6.75
 3 1 12 7.48 6.51
 3 -1 12 13.2 6.06
 3 1 13 56.13 11.53
 3 1 13 81.58 14.93
 3 -1 13 91.71 15.34
 3 1 14 2.85 4.77
 3 1 14 -2.08 3.12
 3 -1 14 7.79 6.16
 3 1 15 3.63 4.73
 3 -1 15 3.31 3.49
 3 1 16 3.93 3.55
 3 -1 16 -0.6 2.82
 3 -1 16 3.25 5.64
 3 -3 -17 19.78 8.22
 3 3 -17 25.64 8.31
 3 -3 -16 0.91 3.82
 3 3 -16 11.81 6.07
 3 -3 -15 75.94 13.74
 3 3 -15 72.9 11.81
 3 -3 -14 4.89 4.35
 3 3 -14 8.52 4.44
 3 3 -13 68.65 10.11
 3 3 -12 30.22 6.82
 3 3 -11 169.16 14.1
 3 3 -11 144.27 11.93
 3 -3 -10 22.21 4.96
 3 3 -10 22.93 4.87
 3 3 -10 29.18 5.22
 3 -3 -9 333.54 18.51
 3 3 -9 357.46 18.07
 3 3 -9 357.91 16.51
 3 -3 -8 14.67 4.11
 3 -3 -8 16.19 3.59
 3 3 -8 11.67 3.09
 3 3 -8 13.7 3.13
 3 -3 -7 75.06 8.62
 3 -3 -7 73.87 7.06
 3 3 -7 55.06 6.94
 3 -3 -7 77.38 7.48
 3 3 -7 74.97 6.87
 3 -3 -7 77.23 10.03
 3 3 -7 71.01 6.35
 3 3 -6 18.02 4
 3 -3 -6 14.33 3.64
 3 3 -6 16.71 3.91
 3 3 -6 18.45 4.79
 3 -3 -6 19.3 3.82
 3 -3 -6 9.97 2.92
 3 3 -6 11.19 2.54
 3 3 -6 12.75 2.6
 3 3 -5 287.84 9.41
 3 -3 -5 287.36 14.35
 3 3 -5 290.2 14.84
 3 -3 -5 293.06 13.59
 3 3 -5 292.16 14.07
 3 3 -5 268.55 16.05
 3 -3 -5 303.17 15.3
 3 -3 -5 295.65 14.82
 3 3 -5 291.12 10.08
 3 3 -5 292 10.61
 3 3 -4 7.35 2.58
 3 -3 -4 3.75 2.05
 3 -3 -4 6.36 2.29
 3 3 -4 3.22 2.07
 3 3 -4 4.01 1.43
 3 3 -4 2.96 1.86
 3 -3 -4 -0.04 1.38
 3 -3 -4 6.53 2.39
 3 -3 -4 5.82 2.48
 3 -3 -3 358.79 16.1
 3 3 -3 337.49 13.17
 3 3 -3 326.5 14.34
 3 -3 -3 310.04 13.45
 3 -3 -3 314.09 13.96
 3 3 -3 333.9 13.76
 3 3 -3 331.26 15.77
 3 -3 -3 303.26 13.65
 3 -3 -3 332.63 16.24
 3 -3 -2 1.01 1.57
 3 3 -2 1.71 1.13
 3 3 -2 0.51 0.47
 3 3 -2 2.07 1.41
 3 3 -2 1.43 1.78
 3 -3 -2 3.09 1.97
 3 3 -2 -0.51 0.87
 3 -3 -2 2.29 1.34
 3 -3 -2 2.96 1.79
 3 3 -1 430.52 14.97
 3 3 -1 452.49 17.4
 3 3 -1 391.11 16.41
 3 -3 -1 407.14 17.9
 3 -3 -1 412.21 15.13
 3 3 -1 409.37 10.21
 3 3 -1 413.77 9.58
 3 3 -1 424.81 11.63
 3 3 0 23.42 3.37
 3 3 0 22.62 4.19
 3 3 0 18.8 2.68
 3 -3 0 23.34 3.79
 3 3 0 19.72 2.92
 3 -3 0 22.72 4.44
 3 3 1 221.43 9.38
 3 3 1 225.54 13.89
 3 -3 1 212.17 13.5
 3 3 1 179.79 9.41
 3 -3 1 226.43 11.87
 3 3 1 209.13 10.49
 3 3 2 2.09 0.98
 3 3 2 4.44 2.52
 3 -3 2 4.99 2.12
 3 3 2 4.37 2.41
 3 -3 2 1.29 2
 3 3 3 376.37 9.93
 3 3 3 386.67 20.1
 3 -3 3 359.78 18.98
 3 -3 3 374.66 17.35
 3 3 3 417.96 17.96
 3 -3 3 350.18 15.93
 3 -3 4 8.58 2.97
 3 3 4 11.86 1.48
 3 3 4 7.61 3.31
 3 -3 4 6.25 3.03
 3 3 4 10.36 3.46
 3 -3 4 4.43 2.18
 3 3 5 157.63 14.31
 3 -3 5 158.46 14.23
 3 -3 5 147.46 12.61
 3 3 5 163.26 13.34
 3 -3 5 176.29 12.57
 3 3 6 9.24 4.37
 3 3 6 11.06 4.5
 3 -3 6 6.44 2.78
 3 3 7 381.16 23.91
 3 3 7 365.4 22.97
 3 -3 7 371.7 20.75
 3 3 8 26.69 7.21
 3 -3 8 15.65 3.12
 3 -3 8 11.38 4.64
 3 3 8 12.59 5.34
 3 3 9 83.36 12.26
 3 -3 9 93.4 7.49
 3 3 9 94.78 13.48
 3 -3 9 100.91 12.26
 3 3 10 22.33 6.87
 3 -3 10 21.93 4.02
 3 -3 10 29.19 7.51
 3 3 10 23.9 7.18
 3 3 11 95.33 14.19
 3 -3 11 113.33 8.95
 3 -3 11 92.74 13.14
 3 3 11 102.28 15.83
 3 3 12 17.23 7.2
 3 -3 12 10.24 5.58
 3 3 12 24.27 8.04
 3 3 13 63.6 12.32
 3 3 13 57.64 12.53
 3 -3 13 60.14 12.22
 3 3 14 4.89 5.23
 3 3 14 11.51 6.44
 3 -3 14 0.74 3.12
 3 3 15 13.39 6.62
 3 3 15 13.68 6.78
 3 -3 15 23.46 8.87
 3 3 16 11.2 6.9
 3 -3 16 7.43 6.12
 3 -5 -16 0.09 3.97
 3 -5 -15 63.37 13.63
 3 5 -15 50.73 9.36
 3 5 -14 4.87 3.86
 3 5 -13 38.77 7.48
 3 5 -12 8.03 3.84
 3 5 -11 64.93 7.98
 3 5 -11 62.09 6.78
 3 5 -10 4.05 1.95
 3 5 -10 5.55 2.5
 3 -5 -9 351.83 19.6
 3 5 -9 367.36 16.03
 3 5 -9 371.49 13.26
 3 -5 -8 2.4 1.65
 3 5 -8 3.03 1.54
 3 -5 -8 1.36 1.41
 3 5 -8 1.29 0.82
 3 -5 -7 291.97 18.21
 3 -5 -7 312.25 14.6
 3 -5 -7 281.68 16.72
 3 5 -7 276.69 10.77
 3 5 -7 270.29 8.07
 3 -5 -6 47.61 6.74
 3 5 -6 55.03 4.02
 3 -5 -6 54.71 5.96
 3 -5 -6 51.41 7.79
 3 5 -5 197.96 11.82
 3 -5 -5 220.32 15.77
 3 5 -5 218.74 13.35
 3 -5 -5 202.75 11.06
 3 5 -5 214.95 12.15
 3 -5 -5 206.34 11.95
 3 5 -5 230.98 15.17
 3 -5 -5 207.83 13.23
 3 5 -5 221.29 5.93
 3 5 -4 17.89 3.94
 3 5 -4 8.95 2.59
 3 5 -4 11.2 3.39
 3 -5 -4 14.58 3.18
 3 5 -4 18.29 3.56
 3 -5 -4 17.63 4.65
 3 -5 -4 11.81 2.67
 3 -5 -4 11.62 3.18
 3 -5 -4 10.89 3.78
 3 -5 -3 396.88 20.92
 3 5 -3 368.73 17.59
 3 5 -3 425.6 17.33
 3 -5 -3 391.45 14.57
 3 5 -3 419.99 15.48
 3 5 -3 421.35 18.6
 3 -5 -3 392.86 16.83
 3 -5 -3 421.76 20.94
 3 5 -2 20.56 3.25
 3 5 -2 18.14 4.27
 3 -5 -2 25.28 3.71
 3 5 -2 18.08 4.03
 3 5 -2 18.12 3.57
 3 -5 -2 24.15 5.2
 3 -5 -2 23.19 4.78
 3 5 -2 20.74 2.41
 3 -5 -1 11.81 3.82
 3 5 -1 15.43 3.22
 3 5 -1 15.31 4.06
 3 5 -1 12.72 3.35
 3 5 -1 16.6 2.94
 3 -5 -1 18.61 3.78
 3 -5 -1 14.9 3.93
 3 5 -1 16.45 2.67
 3 -5 0 53.38 8.09
 3 5 0 43.67 4.82
 3 5 0 50.38 7.32
 3 -5 0 47.53 5.93
 3 5 0 49.27 5.28
 3 -5 0 34.08 6.11
 3 5 1 354.56 20.18
 3 5 1 333.88 12.58
 3 -5 1 335.2 16.08
 3 -5 1 321.12 18.67
 3 5 1 360.62 15.58
 3 5 2 4.77 1.55
 3 5 2 0.56 2.08
 3 -5 2 1.54 1.64
 3 -5 2 4.21 2.45
 3 5 2 6.94 2.96
 3 5 3 128.89 12.99
 3 -5 3 124.56 10.6
 3 -5 3 115.37 11.74
 3 5 3 141.64 11.67
 3 -5 4 44.71 6.17
 3 5 4 50.74 8.62
 3 -5 4 51.56 7.18
 3 -5 4 49.15 8.03
 3 5 4 54.07 7.81
 3 5 5 303.19 21.45
 3 5 5 314.72 19.77
 3 -5 5 303.82 16.63
 3 5 6 1.83 2.59
 3 -5 6 -1.21 1.36
 3 5 6 -2.08 2.86
 3 5 7 433.21 27.51
 3 5 7 439.29 26.4
 3 -5 7 422.6 21.76
 3 5 8 7.68 4.14
 3 -5 8 6.37 2.85
 3 -5 8 5.25 3.13
 3 5 8 10.9 4.8
 3 5 9 27.31 7.63
 3 -5 9 23.61 4.61
 3 -5 9 32.23 6.88
 3 5 9 35.21 8.73
 3 5 10 -0.51 3.05
 3 -5 10 1.43 1.65
 3 5 10 0.89 2.74
 3 -5 10 4.32 3.74
 3 5 11 67.9 13.19
 3 -5 11 61.57 7.6
 3 5 11 61.69 12.48
 3 -5 11 77.95 11.81
 3 5 12 1.93 3.61
 3 -5 12 7.22 4.98
 3 5 12 4.54 4.17
 3 5 13 68.29 13.85
 3 -5 13 38.19 9.66
 3 5 13 40.67 10.94
 3 5 14 7.3 5.21
 3 5 14 1.89 4.39
 3 -5 14 0.92 4.33
 3 5 15 17.39 8.23
 3 -5 15 15.47 8.25
 3 5 16 0.94 4.22
 3 -5 16 6.87 6.31
 3 -7 -17 11.67 6.65
 3 -7 -16 5.91 3.8
 3 -7 -15 77.42 13.84
 3 -7 -14 1.12 4.22
 3 -7 -13 21.12 6.65
 3 7 -13 17.13 4.47
 3 -7 -12 15.16 5.48
 3 7 -12 22.06 4.99
 3 -7 -11 115.21 13.63
 3 7 -11 107.61 9.54
 3 -7 -10 76.32 10.98
 3 7 -10 77.78 7.52
 3 -7 -9 73.62 10
 3 7 -9 69.63 6.51
 3 7 -8 2.51 1.44
 3 -7 -8 -2.91 3.19
 3 7 -7 236.27 9.26
 3 -7 -7 270.27 17.36
 3 -7 -7 251.49 12.51
 3 7 -6 4.15 2.31
 3 -7 -6 6.3 2.91
 3 7 -6 5.66 1.28
 3 -7 -6 9.76 2.64
 3 7 -5 315.9 18.46
 3 -7 -5 297.72 21.56
 3 -7 -5 311.39 17.23
 3 -7 -5 315.54 13.32
 3 7 -5 294.83 17.28
 3 7 -4 29.07 6.08
 3 -7 -4 31.82 4.13
 3 7 -4 33.58 5.82
 3 -7 -4 34.23 7.29
 3 -7 -4 26.7 3.89
 3 -7 -3 169.58 16.17
 3 7 -3 174.56 14.57
 3 7 -3 186.34 6.42
 3 7 -3 203.17 10.73
 3 7 -3 194.49 13.14
 3 -7 -3 179.17 9.15
 3 -7 -2 64.77 9.96
 3 7 -2 62.14 6.88
 3 -7 -2 61.35 5.34
 3 7 -2 74.5 6.14
 3 7 -2 53.6 8.3
 3 7 -2 57.24 6.76
 3 7 -2 69.27 4.88
 3 -7 -1 154.97 15.48
 3 7 -1 157.41 14.4
 3 7 -1 184.26 11.26
 3 7 -1 174.97 11.42
 3 7 -1 151.78 8.35
 3 -7 -1 168.28 12.37
 3 7 -1 164.8 8.76
 3 -7 -1 169.74 14.6
 3 7 -1 148.84 9.1
 3 7 0 144.97 14.32
 3 7 0 125.12 9.59
 3 7 0 137.18 7.69
 3 -7 0 143.77 11.44
 3 -7 0 145.71 13.65
 3 7 0 138.44 9.79
 3 7 1 116.56 13.31
 3 7 1 101.28 6.63
 3 -7 1 108.99 10.2
 3 7 1 108.32 9.61
 3 7 2 48.98 9.16
 3 7 2 50.19 7.09
 3 7 3 406.77 26.1
 3 7 3 361.25 20.26
 3 7 4 29.12 7.87
 3 7 4 17.04 5.01
 3 7 5 242.36 21.84
 3 7 5 237.41 18.61
 3 -7 5 254.14 15.65
 3 7 6 1.62 2.52
 3 -7 6 0.89 1.81
 3 7 6 -2.29 2.6
 3 7 7 81.71 13.44
 3 7 7 66.64 11.17
 3 -7 7 88.81 10.13
 3 7 8 43.12 10.2
 3 -7 8 63.27 8.04
 3 7 8 54.17 10.57
 3 -7 8 40.1 7.29
 3 7 9 82.93 14.35
 3 -7 9 75.56 9.06
 3 -7 9 81.2 10.76
 3 7 9 98.48 15.02
 3 7 10 23.13 8.84
 3 -7 10 12 4.12
 3 -7 10 19.46 5.93
 3 7 10 11.32 5.4
 3 7 11 20.76 7.94
 3 -7 11 24.92 5.53
 3 7 11 11.38 5.24
 3 -7 11 21.32 6.43
 3 7 12 -0.22 3.2
 3 7 12 8.89 5.84
 3 -7 12 0.41 2.38
 3 7 13 25.39 9.47
 3 -7 13 43.47 9.72
 3 7 14 1.48 4.62
 3 -7 14 1.05 4.08
 3 7 15 21.82 9.76
 3 -9 -16 2.3 3.93
 3 -9 -15 33.77 8.78
 3 -9 -14 5.58 4.37
 3 -9 -13 2.51 3.15
 3 -9 -12 5.3 3.62
 3 -9 -11 100.46 12.83
 3 9 -10 12.25 3.39
 3 -9 -10 15.69 5.53
 3 9 -9 112.87 8.08
 3 -9 -9 113.92 12.81
 3 9 -8 3.06 1.66
 3 -9 -8 -0.53 2.88
 3 -9 -7 296.57 19.05
 3 -9 -6 9.72 2.44
 3 9 -6 9.92 3.71
 3 -9 -5 132.11 8.26
 3 9 -5 117.55 13.1
 3 -9 -4 4.41 1.68
 3 9 -4 2.8 2.58
 3 9 -4 7.01 1.79
 3 9 -3 84.39 11.58
 3 -9 -3 88.39 6.94
 3 -9 -3 93.95 5.52
 3 9 -3 89.51 9.11
 3 9 -3 92.54 6.66
 3 9 -2 20.97 4.29
 3 -9 -2 27.07 3.16
 3 9 -2 32.51 7.92
 3 9 -2 22.33 3.66
 3 9 -1 898.28 38.73
 3 9 -1 842.13 25.3
 3 9 -1 955.5 25.33
 3 9 0 17.25 2.63
 3 9 0 15.13 5.46
 3 9 0 16.98 3.62
 3 9 0 17.59 3.61
 3 9 1 64.59 6.91
 3 9 1 67.28 4.6
 3 9 1 66.51 11.33
 3 9 1 60.58 7.55
 3 9 2 12.71 2
 3 9 2 11.84 5.31
 3 9 2 11.07 1.92
 3 9 2 13.88 4.34
 3 9 3 133.88 6.78
 3 9 3 150.99 17.6
 3 9 3 155.23 14.21
 3 9 4 4.92 4.49
 3 9 4 3.17 2.99
 3 9 5 169.06 19.91
 3 9 5 198.02 18.11
 3 -9 5 190.67 14.05
 3 9 6 1.98 3.53
 3 -9 6 5.09 2.94
 3 9 6 7.01 4.86
 3 9 7 100.09 16.19
 3 9 7 118.31 15.66
 3 -9 7 109.02 11.34
 3 9 8 2.04 3.53
 3 -9 8 15.6 4.96
 3 -9 8 15.19 5.03
 3 9 8 12.49 6
 3 9 9 93.19 16.79
 3 -9 9 112.92 12.54
 3 9 9 74.16 13.39
 3 -9 9 75.65 10.38
 3 9 10 26.25 10.54
 3 -9 10 24.83 6.42
 3 9 10 14.62 6.6
 3 -9 10 27 6.84
 3 -9 11 -3.9 3.7
 3 9 11 1.42 3.26
 3 9 12 6.29 6.09
 3 -9 12 8.79 4.02
 3 9 12 22.87 9.72
 3 -9 12 7.53 4.5
 3 9 13 58.02 14.9
 3 9 14 14.63 8.78
 3 -11 -14 7.93 5.18
 3 -11 -13 37.97 8.96
 3 -11 -12 9.95 4.9
 3 -11 -11 51.48 9.85
 3 -11 -10 -2.48 2.15
 3 11 -6 8.91 4.55
 3 -11 -5 88.6 5.95
 3 11 -5 94.65 13.48
 3 -11 -4 3.11 1.17
 3 11 -4 7.88 4.5
 3 11 -4 5.04 2.04
 3 11 -3 122.18 15.93
 3 11 -3 93.23 8.07
 3 -11 -3 99.82 7.11
 3 11 -2 71.15 12.26
 3 11 -2 83.33 8.11
 3 11 -2 68.99 7.45
 3 11 -1 179.87 19.56
 3 -11 -1 188.83 6.65
 3 11 -1 194.85 12.17
 3 11 -1 176.78 12.66
 3 11 0 40.78 5.39
 3 11 0 55.06 11.44
 3 11 0 44.01 6.81
 3 11 1 86.07 7.6
 3 11 1 74.16 12.97
 3 11 1 81.82 9.64
 3 11 2 -1.54 4.12
 3 11 2 3.51 1.87
 3 11 2 3.06 1.54
 3 11 2 2.92 2.97
 3 11 3 104.21 8.89
 3 11 3 134.03 18.31
 3 11 3 126.49 13.46
 3 11 4 1.15 3.32
 3 11 4 3.47 3.36
 3 11 5 51.52 12.68
 3 11 6 16.92 7.97
 3 -11 6 13.62 3.98
 3 11 7 66.84 14.68
 3 -11 7 67.17 10.36
 3 -11 7 57.98 8.91
 3 11 7 51.09 10.99
 3 11 8 -6.72 5.64
 3 -11 8 1.23 2.63
 3 -11 8 -1.21 2.74
 3 11 8 -4.6 4.76
 3 11 9 53.62 13.7
 3 -11 9 59.5 10.06
 3 11 9 57.19 12.1
 3 -11 9 50.81 8.66
 3 11 10 2.95 4.74
 3 -11 10 -0.95 2.4
 3 -11 10 -1.32 2.26
 3 -11 11 50.13 9.56
 3 11 11 54.37 14.21
 3 -11 12 2.34 3.85
 3 11 12 7.46 6.38
 3 13 -6 2.59 3.58
 3 13 -5 39.43 9.9
 3 13 -4 25.15 7.73
 3 13 -3 124.46 17.59
 3 13 -3 113.76 10.03
 3 13 -2 7.16 5.75
 3 13 -2 1.9 1.99
 3 13 -1 163.29 20.82
 3 13 -1 172.15 14
 3 13 0 0.46 3.7
 3 13 0 2.03 2.22
 3 13 1 148.73 20.54
 3 13 1 151.37 14.25
 3 13 2 26.34 8.98
 3 13 2 30.11 6.96
 3 13 3 45.11 12.03
 3 13 3 38.01 8.11
 3 13 4 8.82 6
 3 13 4 8.74 4.99
 3 13 5 20.51 8.67
 3 13 5 24 7
 3 13 6 8.34 6.04
 3 -13 6 8.07 3.88
 3 13 6 11.94 5.83
 3 13 7 78.25 16.81
 3 -13 7 79.8 12.23
 3 13 7 106.59 15.9
 3 -13 7 94.77 11.21
 3 13 8 4.73 5.11
 3 -13 8 1.42 4.02
 3 13 8 7.05 4.92
 3 13 9 5.99 5.57
 3 -13 9 25.83 7.77
 3 13 9 25.39 9.15
 3 13 10 20.14 10.08
 3 -13 10 21.06 6.91
 3 -13 11 28.42 8.03
 3 -13 12 -6.71 5.05
 3 15 -5 53.48 12.27
 3 15 -4 4.57 4.39
 3 15 -3 71.69 14.46
 3 15 -2 0.61 3.56
 3 15 -1 139.35 20.45
 3 15 0 -1.43 5.49
 3 15 1 84.43 16.32
 3 15 1 70.22 10.79
 3 15 2 6.56 6.22
 3 15 2 0.71 2.07
 3 15 3 60.38 14.73
 3 15 3 36.89 8.51
 3 15 4 17 8.19
 3 15 4 -5.67 3.3
 3 15 5 28.93 11.81
 3 15 5 44.89 10.29
 3 15 6 14.26 9.03
 3 -15 6 -0.14 3.24
 3 15 6 8.15 4.62
 3 15 7 59.93 15.3
 3 -15 7 58.7 11.33
 3 15 7 46.54 10.92
 3 -15 8 7.49 5.27
 3 15 8 3.53 5.61
 3 15 9 8.13 6.47
 3 17 -4 10.38 7.46
 3 17 -3 12.66 7.9
 3 17 -2 4.28 6.38
 3 17 -1 42.93 12.67
 3 17 0 6.23 7.12
 3 17 1 2.54 6.13
 3 17 2 5.85 5.3
 3 17 7 55.01 17.31
 4 0 -18 13.32 8
 4 0 -17 -1.05 3.12
 4 0 -16 16.71 7.38
 4 0 -15 2.87 4.34
 4 0 -14 37.81 8.79
 4 0 -13 -1.43 2.13
 4 0 -9 -1.61 2.66
 4 0 -8 166.1 12.58
 4 0 -8 154.19 13.45
 4 0 -7 0.02 1.73
 4 0 -7 2.19 1.99
 4 0 -6 76.04 8.01
 4 0 -6 78.32 9.21
 4 0 -6 62.56 7.89
 4 0 -5 -1.65 2.41
 4 0 -5 0.36 1.28
 4 0 -5 -0.21 1.44
 4 0 -5 1.29 0.84
 4 0 -4 290.16 16.33
 4 0 -4 296.22 15
 4 0 -4 289.23 15.76
 4 0 -4 314.41 13.83
 4 0 -3 -0.02 1.57
 4 0 -3 -1.6 1.18
 4 0 -3 0 1.13
 4 0 -3 0.36 0.73
 4 0 -3 -0.29 0.93
 4 0 -2 897.01 25.92
 4 0 -2 918.56 28.38
 4 0 -2 900.42 19.67
 4 0 -2 946.23 22.11
 4 0 -2 916.22 23.57
 4 0 -1 0.23 1.45
 4 0 -1 1.45 1.28
 4 0 -1 2.29 1.27
 4 0 -1 -0.22 1
 4 0 0 598.2 20.01
 4 0 0 622.11 21.08
 4 0 0 645.36 18.36
 4 0 1 1.13 1.68
 4 0 1 1.86 1.62
 4 0 1 -0.16 1.02
 4 0 2 567.07 22.1
 4 0 2 577.49 20.87
 4 0 2 614.13 21.52
 4 0 3 0.6 1.3
 4 0 3 3.16 2.38
 4 0 3 0.12 0.9
 4 0 4 8.9 3.48
 4 0 4 6.28 2.52
 4 0 5 2.28 2.81
 4 0 6 60.69 8.74
 4 0 7 -0.15 2.04
 4 0 8 117.88 4.51
 4 0 8 119.51 13.85
 4 0 9 -0.86 2.8
 4 0 10 527.78 32.07
 4 0 11 1.27 4.1
 4 0 12 0.8 3.45
 4 0 13 10.86 7.13
 4 0 14 48.98 12.75
 4 0 15 0.01 4.86
 4 0 15 -5.68 6.9
 4 0 16 15.24 7.17
 4 -2 -17 3.2 3.77
 4 2 -17 -1.22 3.01
 4 -2 -16 40.83 10.51
 4 2 -16 25.96 7.16
 4 -2 -15 1.76 4.4
 4 2 -15 0.97 2.56
 4 -2 -14 69.61 12.29
 4 2 -14 79.65 11.67
 4 2 -13 1.61 2.85
 4 2 -12 138.3 14.01
 4 2 -11 3.85 2.75
 4 2 -10 21.3 4.9
 4 2 -10 18.83 4.6
 4 -2 -9 4.74 2.85
 4 2 -9 3.92 2.39
 4 -2 -8 587.44 23.22
 4 2 -8 618.49 24.29
 4 -2 -8 582.13 15.84
 4 2 -8 582.69 22.6
 4 -2 -7 301.02 16.09
 4 2 -7 308.03 16.67
 4 -2 -7 312.22 18.77
 4 -2 -7 276.59 11.79
 4 -2 -7 314.2 18.48
 4 2 -7 272.89 14.7
 4 -2 -6 730.65 24.4
 4 2 -6 745.86 25.14
 4 2 -6 722.92 28.87
 4 -2 -6 748.78 27.75
 4 -2 -6 712.23 19.86
 4 -2 -6 714.26 27.61
 4 2 -6 671.79 25.62
 4 -2 -5 4.91 2.25
 4 2 -5 0.18 1.45
 4 -2 -5 -0.05 1.76
 4 2 -5 4.81 2.22
 4 2 -5 2.69 1.07
 4 2 -5 0.72 0.89
 4 -2 -5 2.43 1.54
 4 -2 -5 1.56 1.31
 4 -2 -4 128.5 9.06
 4 2 -4 125.49 10.41
 4 2 -4 121.43 7.04
 4 2 -4 115.66 10.65
 4 -2 -4 138.03 10.96
 4 -2 -4 125.39 9.93
 4 2 -4 117.83 9.58
 4 -2 -4 125.65 9.6
 4 -2 -4 127.16 10.39
 4 2 -3 3.76 2.27
 4 2 -3 0.99 1.42
 4 -2 -3 0.68 1.21
 4 2 -3 0.62 1.3
 4 2 -3 3.56 1.54
 4 2 -3 2.1 0.81
 4 -2 -3 -0.24 0.88
 4 2 -3 2.02 1.09
 4 -2 -3 0.94 1.73
 4 2 -2 106.98 8.91
 4 2 -2 112.57 10.12
 4 -2 -2 107.84 8
 4 -2 -2 101.13 9.13
 4 -2 -2 106.97 8.15
 4 2 -2 103.48 6.56
 4 2 -2 105.39 5.55
 4 2 -1 127.42 9.25
 4 -2 -1 124.66 8.67
 4 2 -1 136.53 7.22
 4 -2 -1 143.22 11.04
 4 2 -1 119.76 7.79
 4 2 -1 126.42 6.82
 4 2 -1 132.61 7.95
 4 2 0 430.49 16.32
 4 -2 0 438.63 19.79
 4 2 0 404.56 15.22
 4 2 0 410.88 10.89
 4 2 0 424.35 14.15
 4 -2 0 468.61 17.35
 4 2 0 437.73 15.58
 4 2 1 85.62 6.94
 4 2 1 85.72 7.61
 4 2 1 88.9 7.43
 4 -2 1 94.94 9.46
 4 -2 1 97.67 8.34
 4 2 1 90.14 7.8
 4 2 2 789.96 19.58
 4 -2 2 716.16 27.25
 4 2 2 793.62 24.12
 4 -2 2 817.34 25.38
 4 2 2 864.16 25.17
 4 -2 2 786.12 24.97
 4 -2 3 61.28 7.29
 4 2 3 45.32 4.33
 4 2 3 57.69 7.15
 4 -2 3 63.53 7.71
 4 2 3 58.2 7.22
 4 -2 3 52.76 7.73
 4 2 4 2.83 1.17
 4 -2 4 3.26 2.22
 4 2 4 3.42 2.17
 4 -2 4 0.05 1.3
 4 2 4 2.35 1.93
 4 -2 5 35.72 6.46
 4 2 5 31.78 2.73
 4 2 5 33.47 6.42
 4 2 6 243.97 17.94
 4 -2 6 211.7 16.09
 4 -2 7 7.31 4.48
 4 2 7 6.04 4.28
 4 -2 8 144.43 7.98
 4 2 8 146.21 15.7
 4 -2 8 138.71 14.67
 4 -2 9 12.27 2.47
 4 2 9 24.58 7.5
 4 -2 9 13.39 5.34
 4 -2 10 133 8.04
 4 2 10 125.71 16.79
 4 -2 10 149.62 16.53
 4 -2 11 30.21 7.77
 4 2 11 44.61 10.82
 4 2 12 10.96 6.19
 4 -2 12 6.51 3.69
 4 2 12 4.84 4.7
 4 2 13 4.81 4.35
 4 -2 13 5.56 4.93
 4 2 13 -1.63 3.37
 4 2 14 31.9 10.09
 4 2 14 17.12 7.37
 4 -2 14 35.5 10.74
 4 2 15 1.8 3.06
 4 -2 15 0.54 5.1
 4 2 16 12.07 6.7
 4 -4 -16 40.71 10.97
 4 4 -15 42.37 8.29
 4 4 -14 42.88 7.99
 4 4 -13 -0.97 2.36
 4 4 -12 111.44 11.58
 4 4 -11 16.41 4.44
 4 4 -11 13.2 3.59
 4 4 -10 102.31 9.54
 4 4 -10 127.47 9.72
 4 -4 -9 8.66 3.15
 4 -4 -9 11.94 3.75
 4 4 -9 13.24 3.27
 4 4 -9 11.06 2.77
 4 -4 -8 508.02 21.49
 4 -4 -8 496.87 21.19
 4 -4 -8 469.62 22.92
 4 4 -8 494.91 17.19
 4 4 -8 476.02 16.16
 4 -4 -7 35.64 6.42
 4 -4 -7 33.07 5.34
 4 -4 -7 35.42 5.91
 4 4 -7 39.29 6.09
 4 4 -7 32.94 4
 4 -4 -7 33.02 5.8
 4 4 -7 31 4.07
 4 4 -6 433.18 13.74
 4 -4 -6 412.23 19.87
 4 -4 -6 390.01 17.87
 4 4 -6 434.71 19.16
 4 -4 -6 436.46 20.61
 4 -4 -6 405.29 19.51
 4 4 -6 447.37 12.07
 4 4 -6 413.22 13.13
 4 -4 -5 10.89 3.18
 4 4 -5 14.82 3.09
 4 -4 -5 13.91 3.36
 4 4 -5 18.06 4.05
 4 4 -5 11.03 3.39
 4 -4 -5 20.81 4.52
 4 4 -5 13.32 1.57
 4 -4 -5 18.79 4.31
 4 -4 -5 9.9 3.2
 4 -4 -4 148.45 12.24
 4 4 -4 150.14 10.34
 4 4 -4 155.93 11.64
 4 -4 -4 148.62 11
 4 -4 -4 139.82 10.53
 4 4 -4 139.03 10.17
 4 4 -4 130.72 11.85
 4 -4 -4 138.75 10.69
 4 -4 -4 162.55 13.16
 4 -4 -3 1.26 1.17
 4 4 -3 6.77 2.68
 4 4 -3 5.45 1.43
 4 4 -3 3.79 2.51
 4 4 -3 3.05 2.08
 4 4 -3 3.79 2.26
 4 -4 -3 3.79 1.93
 4 -4 -3 3.09 2.18
 4 -4 -3 1.48 1.57
 4 -4 -2 206.78 14.64
 4 4 -2 188.12 12.89
 4 4 -2 187.1 11.75
 4 4 -2 169.45 12.82
 4 4 -2 189.53 11.48
 4 -4 -2 185.98 11.78
 4 4 -2 178.7 6.77
 4 -4 -2 199.42 14.46
 4 4 -2 191.69 8.38
 4 4 -1 2.19 1.74
 4 4 -1 1.85 2.11
 4 4 -1 1.46 1.27
 4 4 -1 2.23 1.1
 4 -4 -1 1.46 1.5
 4 4 -1 3.08 1.17
 4 4 -1 1.28 0.92
 4 -4 -1 0.71 1.44
 4 4 0 173.74 10.25
 4 4 0 183.58 13.6
 4 -4 0 148.97 10.86
 4 -4 0 179.99 14.07
 4 4 0 155.57 9.36
 4 4 1 13.96 2.76
 4 4 1 18.21 5.08
 4 -4 1 14.45 3.62
 4 4 1 16.61 3.4
 4 -4 1 14.06 4.41
 4 4 2 483.51 15.17
 4 4 2 490.24 24.31
 4 -4 2 475.81 20.7
 4 -4 2 434.84 23.12
 4 4 2 439.03 18.84
 4 4 3 192.93 8.83
 4 4 3 210.27 16.55
 4 4 3 186.12 13.42
 4 -4 3 198.98 13.46
 4 4 4 9.74 4.44
 4 -4 4 11.01 3.57
 4 4 4 7.34 1.68
 4 4 4 7.96 3.53
 4 4 5 93.9 12.22
 4 4 5 104.03 11.45
 4 -4 5 107.4 10.8
 4 4 6 252.68 20.52
 4 4 6 262.1 19.27
 4 -4 6 266.7 17.6
 4 4 7 1.41 3.63
 4 4 7 1.67 2.8
 4 -4 7 4.17 3.92
 4 4 8 170.34 18.24
 4 4 8 173.58 17.83
 4 -4 8 162.16 15.27
 4 4 9 3.42 3.13
 4 -4 9 15.08 3.5
 4 -4 9 10.56 5.05
 4 4 9 11.14 5.27
 4 4 10 64.94 12.34
 4 -4 10 55.98 6.58
 4 -4 10 58.9 10.27
 4 4 10 53.6 11.41
 4 4 11 0.64 2.53
 4 4 11 4.42 5.22
 4 -4 11 2.47 3.55
 4 4 12 55.12 12.39
 4 -4 12 53.21 11.01
 4 4 12 41.53 11.82
 4 4 13 -5.26 5.17
 4 -4 13 5.46 5.51
 4 4 13 -2.39 3.91
 4 4 14 15.56 7.81
 4 -4 14 12.68 6.66
 4 4 14 1.74 4.17
 4 4 15 8.23 6.83
 4 -4 15 12.95 7.41
 4 -6 -16 65.39 13.55
 4 -6 -15 -9.24 6.24
 4 -6 -14 46.3 10.39
 4 -6 -13 -3.48 3.22
 4 6 -12 7.63 2.89
 4 -6 -12 6.6 4
 4 6 -11 10.92 3.21
 4 -6 -11 8.1 4.83
 4 -6 -10 3.24 2.71
 4 6 -10 5.44 2.2
 4 -6 -10 4.99 3.17
 4 6 -9 12.96 1.85
 4 -6 -9 21.57 6.16
 4 6 -9 12.06 2.62
 4 -6 -9 14.21 4.8
 4 -6 -8 111.99 12.38
 4 -6 -8 112.36 11.67
 4 6 -8 112.48 6.47
 4 -6 -8 109.79 9.76
 4 -6 -7 32.92 6.16
 4 6 -7 27.77 2.48
 4 -6 -7 28.8 4.87
 4 -6 -7 32.05 6.71
 4 6 -6 268.49 14.91
 4 -6 -6 253.18 18.62
 4 -6 -6 271.33 17.28
 4 -6 -6 266.39 14.3
 4 6 -6 302.53 16.08
 4 -6 -6 271.37 15.64
 4 6 -5 28.24 5.29
 4 -6 -5 28.21 5.58
 4 -6 -5 30.64 4.98
 4 -6 -5 33.01 5.4
 4 -6 -5 20.34 5.35
 4 6 -5 27.35 5.01
 4 -6 -4 424.04 24.23
 4 6 -4 409.26 20.37
 4 -6 -4 417.59 17.79
 4 -6 -4 427.24 18.05
 4 6 -4 456.83 18.47
 4 6 -4 446.71 22
 4 -6 -4 464.53 20.89
 4 6 -3 -1.38 2.51
 4 6 -3 2.14 2.59
 4 -6 -3 3.64 2.07
 4 6 -3 0.96 1.09
 4 -6 -3 -1.01 1.27
 4 6 -3 1.95 1.15
 4 6 -2 221.92 14.61
 4 -6 -2 206.11 12.59
 4 6 -2 214.47 11.97
 4 -6 -2 201.87 17.06
 4 6 -2 210.1 15.9
 4 6 -2 209.57 12.95
 4 6 -2 226.74 7
 4 6 -2 211.4 9.5
 4 6 -1 18.47 5.26
 4 6 -1 16.52 4.14
 4 6 -1 12.82 2.94
 4 -6 -1 11.81 4.45
 4 6 -1 18.9 3.84
 4 6 -1 14.54 3.08
 4 6 0 526.98 18.18
 4 6 0 574.76 28.13
 4 6 0 543.2 19.16
 4 6 0 519.65 18.85
 4 6 1 100.77 12.33
 4 6 1 81.53 7.13
 4 6 1 94.03 9.06
 4 6 2 858.4 36.46
 4 6 2 852.48 21.61
 4 6 2 836 28.3
 4 6 3 41.65 8.44
 4 6 3 43.6 7.04
 4 6 4 283.5 22.53
 4 6 4 303.73 19.4
 4 -6 4 287.05 17.42
 4 6 5 5.64 2.88
 4 -6 5 2.74 2.61
 4 6 6 181.22 18.9
 4 6 6 184.52 17.11
 4 -6 6 176.02 14.65
 4 6 7 3.4 4.11
 4 -6 7 1.13 2.69
 4 6 7 7.59 4.99
 4 6 8 29.87 8.59
 4 -6 8 8.34 4.01
 4 6 8 27.77 8.06
 4 6 9 5.92 5.22
 4 -6 9 3.64 2.52
 4 -6 9 1.62 1.89
 4 6 9 4.29 3.51
 4 6 10 7.11 6.49
 4 -6 10 3.42 2.86
 4 -6 10 5.44 4.32
 4 6 10 1.21 3.2
 4 6 11 7.04 4.96
 4 -6 11 2.94 1.86
 4 6 11 -3.62 2.95
 4 -6 11 2.24 3.28
 4 6 12 31.58 9.94
 4 6 12 13.14 6.34
 4 -6 12 17.21 6.76
 4 6 13 -1.09 3.04
 4 -6 13 4.68 5.15
 4 6 13 7.71 7.65
 4 6 14 6.18 5.66
 4 -6 14 9.01 4.88
 4 -6 15 3.34 5.01
 4 -8 -16 19.65 8.04
 4 -8 -15 5.45 5.22
 4 -8 -14 18.39 6.86
 4 -8 -13 -1.56 3.1
 4 -8 -12 74.1 11.82
 4 -8 -11 8.76 4.34
 4 -8 -10 79.47 11.21
 4 8 -9 -0.67 1.2
 4 -8 -9 3.61 3.3
 4 -8 -8 154 14.52
 4 -8 -8 128.33 10.09
 4 8 -7 21.2 5.02
 4 -8 -7 13.53 4.49
 4 -8 -7 7.83 2.72
 4 8 -6 30.9 6.14
 4 -8 -6 43.34 7.33
 4 -8 -6 41.27 5.58
 4 -8 -5 21.03 4.16
 4 -8 -5 31.54 5.09
 4 8 -5 25.14 5.7
 4 -8 -4 146.96 10.47
 4 8 -4 149.16 10.65
 4 -8 -4 145.88 9.88
 4 8 -4 138.97 13.86
 4 8 -3 3.43 2.11
 4 8 -3 -0.04 2.08
 4 -8 -3 2.26 1.64
 4 8 -3 1.16 1.51
 4 8 -2 78.23 8.86
 4 -8 -2 76.05 7.28
 4 8 -2 85.86 7.38
 4 8 -2 69.14 10.34
 4 8 -2 85.37 5.61
 4 8 -2 78.12 6.35
 4 8 -1 41.65 8.28
 4 8 -1 44.32 5.18
 4 8 -1 44.71 6.72
 4 8 -1 36.18 5.13
 4 8 -1 36.94 4.48
 4 8 0 127.01 11.08
 4 8 0 125.31 8.57
 4 8 0 130.52 15.05
 4 8 0 137.09 10.69
 4 8 1 55.04 10.47
 4 8 1 38.43 4.82
 4 8 1 47.01 6.81
 4 8 2 105.52 14.58
 4 8 2 95.26 10.36
 4 8 3 12.84 6.09
 4 8 3 8.48 3.89
 4 8 4 258.15 23.85
 4 8 4 280.86 20.34
 4 8 5 2.15 3.56
 4 -8 5 2.52 2.11
 4 8 5 3.33 2.88
 4 8 6 121.76 17.27
 4 8 6 152.45 16.58
 4 -8 6 135.56 13.27
 4 8 7 11.14 5.94
 4 -8 7 22.16 5.58
 4 8 7 7.05 4.2
 4 8 8 78.61 14.58
 4 -8 8 94.95 11.83
 4 8 9 5.23 3.95
 4 -8 9 13.84 4.63
 4 8 9 7.68 4.7
 4 -8 9 6.65 3.5
 4 8 10 89.16 16.5
 4 -8 10 94.86 11.08
 4 8 10 70.18 13.6
 4 -8 10 89.55 12.62
 4 8 11 20.19 8.42
 4 -8 11 14.17 4.62
 4 -8 11 16.78 6.38
 4 8 11 20.13 8.48
 4 8 12 10.05 6.48
 4 8 12 10.47 8.81
 4 -8 12 25.24 7.74
 4 8 13 8.98 4.28
 4 -8 13 9.95 5.92
 4 -8 14 5.37 5.04
 4 -10 -15 6.05 5.73
 4 -10 -14 39.54 9.81
 4 -10 -13 -0.14 2.41
 4 -10 -12 75.94 12.34
 4 -10 -11 10.8 5.32
 4 -10 -10 45.27 9.22
 4 -10 -9 3.41 2.81
 4 -10 -7 273.9 13.67
 4 10 -7 229.95 18.52
 4 -10 -6 51.37 5.97
 4 10 -6 57.65 9.48
 4 -10 -5 2.99 1.82
 4 10 -5 4.1 3.33
 4 -10 -4 93.86 8.25
 4 -10 -4 98.39 7.02
 4 10 -4 75.01 11.56
 4 10 -3 2.52 2.14
 4 -10 -3 1.58 1.27
 4 10 -3 -0.37 3.48
 4 10 -3 5.2 1.54
 4 10 -2 77.86 6.87
 4 -10 -2 85.4 6.99
 4 10 -2 73.12 8.7
 4 10 -2 72.84 11.88
 4 10 -2 87.03 7.03
 4 10 -1 2.43 1.77
 4 10 -1 5.91 5.08
 4 10 -1 3.7 2.47
 4 10 -1 1.61 1.65
 4 10 0 90.92 9.34
 4 10 0 94.72 6.89
 4 10 0 96.58 14.23
 4 10 0 95.7 9.12
 4 10 1 13.65 2.66
 4 10 1 15.67 5.93
 4 10 1 16.59 4.27
 4 10 1 12.68 3.22
 4 10 1 12.94 3.62
 4 10 2 145.45 11.91
 4 10 2 161.78 8.66
 4 10 2 144.79 18.51
 4 10 2 168.44 14.88
 4 10 3 60.28 5.46
 4 10 3 62.4 12.33
 4 10 3 64.29 9.58
 4 10 4 232.34 24.31
 4 10 4 186.77 17.71
 4 10 5 159.35 21.31
 4 10 5 173.87 18.01
 4 -10 5 134.18 13.44
 4 10 6 71.09 14.48
 4 -10 6 83.62 10.58
 4 10 6 75.33 12.35
 4 10 7 6.16 5.37
 4 -10 7 7.26 3.78
 4 10 7 6.37 3.29
 4 10 8 54.76 13.25
 4 -10 8 51.49 9.03
 4 10 8 54.97 11.86
 4 10 9 9.16 7.95
 4 -10 9 0.98 2.62
 4 -10 9 2.13 2.87
 4 10 9 10.55 4.71
 4 10 10 49.45 12.68
 4 -10 10 81.05 11.91
 4 10 10 49.19 12.53
 4 -10 10 55.78 10.1
 4 10 11 1.53 5.85
 4 -10 11 6.68 3.64
 4 10 11 9.04 6.39
 4 -10 11 2.05 3.78
 4 10 12 8.47 7.55
 4 -12 -14 8.08 4.75
 4 -12 -13 9.08 5.74
 4 12 -7 22.94 6.56
 4 12 -6 160.07 17.94
 4 -12 -5 21.99 3.61
 4 12 -5 24.41 7.68
 4 -12 -4 87.56 7.71
 4 12 -4 112.25 15.75
 4 -12 -3 -0.14 1.35
 4 12 -3 5.53 4.71
 4 12 -3 2.43 1.65
 4 12 -2 209.36 22.28
 4 12 -2 217.68 14.92
 4 12 -2 211.66 12.51
 4 12 -1 -0.3 1.66
 4 12 -1 -1.44 4.19
 4 12 -1 6.21 3.13
 4 12 0 230.5 24.06
 4 12 0 215.03 15.14
 4 12 1 14.49 5.96
 4 12 1 18.42 4.84
 4 12 2 99.86 16.51
 4 12 2 103.63 11.82
 4 12 3 0.24 5.01
 4 12 3 -2.35 1.97
 4 12 4 17.86 8.06
 4 12 4 22.88 6.65
 4 12 5 3.64 4.12
 4 12 6 5.82 6.67
 4 -12 6 14.92 5.12
 4 12 6 3.68 3.65
 4 12 7 2.87 4.36
 4 -12 7 6.65 4.15
 4 12 7 0.6 2.92
 4 12 8 31.48 11.59
 4 -12 8 33.77 7.54
 4 -12 8 48.27 9.38
 4 12 8 43.78 10.92
 4 12 9 8.48 7.27
 4 -12 9 -1.94 2.47
 4 -12 9 9.06 5.42
 4 12 9 -2.01 3.16
 4 12 10 15.15 8.2
 4 -12 10 25.67 7.39
 4 12 10 23.75 8.63
 4 -12 11 6.95 4.92
 4 14 -6 75.12 13.42
 4 14 -5 5.46 5.48
 4 14 -4 34.97 9.84
 4 14 -3 2.93 4.39
 4 14 -2 12.38 6.24
 4 14 -1 16.79 8.05
 4 14 0 33.43 10.59
 4 14 1 6.63 5.42
 4 14 1 3.52 2.99
 4 14 2 97.46 17.64
 4 14 2 100.09 12.65
 4 14 3 -2.13 4.2
 4 14 3 7.73 4.44
 4 14 4 21.07 9.6
 4 14 4 17.63 6.36
 4 14 5 4.8 4.53
 4 14 5 6.72 4.2
 4 14 6 42.8 13.22
 4 -14 6 57.36 9.32
 4 14 6 62.72 12.39
 4 14 7 0.25 3.65
 4 -14 7 8.23 5.52
 4 14 7 -1 3.68
 4 -14 8 39.19 9.57
 4 14 8 41.36 10.44
 4 -14 9 2.83 3.75
 4 14 9 2.12 3.17
 4 -14 10 36.65 9.32
 4 16 -6 48.13 12.58
 4 16 -5 9.32 5.82
 4 16 -4 36.98 11.68
 4 16 -3 1.25 3.68
 4 16 -2 24.95 9.68
 4 16 -1 3.17 4.84
 4 16 0 35.77 10.82
 4 16 1 23.12 9.57
 4 16 2 4.5 6.52
 4 16 3 13.03 9.33
 4 16 4 2.39 6.46
 4 16 7 -3.89 3.51
 4 16 8 21.9 8.26
 4 18 -5 6.34 6.04
 4 18 -4 42.06 12.61
 4 18 -3 5.84 5.52
 5 -1 -18 -8.71 6.1
 5 -1 -17 21.95 8.28
 5 1 -17 11.29 6.01
 5 -1 -16 4.56 4.53
 5 1 -16 2.34 3.06
 5 -1 -15 6.82 5.49
 5 1 -15 5.65 3.95
 5 1 -14 9.51 4.22
 5 1 -13 344.49 23.82
 5 -1 -10 6.73 3.93
 5 -1 -9 87.82 10
 5 1 -9 105.13 10.97
 5 1 -9 108.05 11.3
 5 -1 -8 6.27 3.26
 5 1 -8 4.9 3.15
 5 1 -8 7.06 3.11
 5 1 -7 62.17 7.89
 5 -1 -7 46.89 6.72
 5 -1 -7 55.37 4.53
 5 -1 -6 16.28 4.45
 5 1 -6 17.43 4.07
 5 1 -6 19.04 2.1
 5 -1 -6 19 3.08
 5 -1 -5 434.38 22.18
 5 -1 -5 437.1 20.44
 5 1 -5 421.28 19.92
 5 -1 -5 402.53 18.38
 5 -1 -5 444.95 19.76
 5 1 -4 1.85 2.34
 5 -1 -4 2.07 1.44
 5 1 -4 1.96 1.39
 5 -1 -4 -0.22 1.95
 5 -1 -4 2.68 2.3
 5 1 -4 2.52 2.01
 5 -1 -4 1.54 1.16
 5 1 -4 1.55 0.98
 5 -1 -4 2.22 1.36
 5 1 -4 5.75 2.13
 5 -1 -3 220.95 15.98
 5 1 -3 196.63 13.72
 5 1 -3 211.75 13.8
 5 1 -3 228.37 16.03
 5 -1 -3 224.78 15.72
 5 1 -3 198.42 9.47
 5 -1 -3 217.16 11.52
 5 -1 -3 210.61 12.33
 5 1 -3 216.56 11.91
 5 1 -3 212.19 11.58
 5 -1 -3 216.62 13.9
 5 1 -2 47.82 6.64
 5 -1 -2 41.11 6.83
 5 1 -2 43.97 7.01
 5 -1 -2 35.1 4.62
 5 -1 -2 37.72 5.2
 5 1 -2 40.92 4.98
 5 1 -2 38.65 4.44
 5 1 -2 41.67 5.31
 5 -1 -2 44.07 6.5
 5 1 -1 68.73 7.63
 5 1 -1 60.96 6.99
 5 1 -1 57.94 5.65
 5 1 -1 48.8 5.25
 5 -1 -1 48.7 5.63
 5 -1 -1 50.37 6.91
 5 1 0 86.57 8.29
 5 -1 0 77.52 8.91
 5 1 0 77.4 8.17
 5 1 0 73.48 6.83
 5 -1 0 67.38 6.93
 5 1 0 85.09 7.82
 5 1 1 224.83 12.99
 5 1 1 188.36 13.17
 5 -1 1 216.62 15.09
 5 1 1 212.07 12.58
 5 -1 1 197.84 12.73
 5 1 1 217.51 13.13
 5 -1 1 208.59 13.36
 5 1 2 1.96 1.52
 5 1 2 2.08 2.06
 5 -1 2 2.9 1.45
 5 1 2 3.7 2.4
 5 -1 2 3.5 2.23
 5 1 2 4.71 2.82
 5 -1 2 4.63 2.72
 5 1 3 330.17 14.58
 5 1 3 307.38 18.67
 5 1 3 340.47 18.72
 5 1 3 368.91 19.29
 5 -1 3 358.16 19.03
 5 1 4 167.33 9.95
 5 1 4 154.22 13.18
 5 -1 4 152.72 13.3
 5 -1 5 76.61 9.63
 5 1 5 80.46 6.5
 5 1 5 88.13 10.64
 5 1 6 1.01 1.02
 5 1 6 2.33 2.47
 5 1 7 24.51 2.5
 5 1 7 27.33 6.67
 5 -1 7 42.4 8.42
 5 -1 8 7.94 4.78
 5 1 8 10.99 5.32
 5 -1 9 250.08 9.07
 5 1 9 229.07 21.22
 5 -1 9 222.29 20.62
 5 1 10 5.33 5.5
 5 -1 10 5.51 5.14
 5 1 11 47.87 11.4
 5 -1 11 37.22 10
 5 1 12 4.8 5.42
 5 -1 12 4.83 5.38
 5 -1 13 25.78 8.57
 5 1 13 23.4 9.45
 5 1 14 7.74 5.63
 5 -1 14 4.64 5.67
 5 1 15 10.33 6.43
 5 -3 -17 16.76 6.67
 5 -3 -16 -3.79 2.88
 5 3 -15 27.07 6.95
 5 3 -14 -0.21 2.07
 5 3 -13 50.06 8.43
 5 3 -12 14.32 4.36
 5 3 -11 134.34 12.29
 5 3 -11 112.3 11.09
 5 3 -10 -1.72 1.84
 5 3 -10 3.48 2.45
 5 -3 -9 115.11 8.38
 5 -3 -9 122.91 11.52
 5 3 -9 133.89 12.51
 5 3 -9 120.11 10.09
 5 3 -9 101.54 9.51
 5 -3 -8 4.81 2.54
 5 3 -8 2.05 3.21
 5 3 -8 0.59 1.48
 5 -3 -7 2.21 1.96
 5 -3 -7 1.15 1.21
 5 3 -7 4.67 2.82
 5 -3 -7 -0.58 2.07
 5 -3 -6 39.79 5.78
 5 -3 -6 38.74 6.14
 5 -3 -6 33.71 6.63
 5 3 -6 30.41 3.51
 5 3 -6 38.49 6.37
 5 -3 -6 17.95 4.37
 5 -3 -5 571.14 22.75
 5 3 -5 531.7 17.59
 5 -3 -5 512.42 23.56
 5 -3 -5 498.56 22.04
 5 3 -5 518.92 22.09
 5 3 -5 511.04 12.13
 5 -3 -5 503.62 21.68
 5 -3 -5 533.08 24.63
 5 -3 -4 69.49 8.19
 5 3 -4 56.87 6.36
 5 -3 -4 71.89 8.2
 5 -3 -4 69.84 8.76
 5 3 -4 66.83 7.91
 5 3 -4 57.96 8.45
 5 -3 -4 55.75 7.01
 5 3 -4 66.74 4.34
 5 -3 -4 60.87 8.08
 5 3 -4 59.91 4.55
 5 3 -3 168.79 12.71
 5 3 -3 167.57 11.52
 5 3 -3 178.09 14.58
 5 3 -3 167.73 12.23
 5 -3 -3 160.03 13.13
 5 -3 -3 157.27 11.08
 5 3 -3 172.46 8.39
 5 -3 -3 176.71 13.95
 5 -3 -3 183.26 12.18
 5 3 -3 159.44 7.03
 5 3 -2 35.28 5.62
 5 3 -2 33.91 4.34
 5 3 -2 30.37 5.52
 5 3 -2 26.91 5.8
 5 -3 -2 25.36 4.58
 5 3 -2 33.29 3.62
 5 3 -2 33.96 4.21
 5 -3 -2 35.59 6.32
 5 3 -1 377.32 17.58
 5 3 -1 378.85 19.35
 5 -3 -1 380.91 17.5
 5 3 -1 388.06 13.03
 5 3 -1 385.09 15.54
 5 -3 -1 342.57 19.87
 5 3 -1 352.46 13.04
 5 3 -1 383.48 15.26
 5 3 0 6.3 2.39
 5 3 0 5.23 2.1
 5 -3 0 4 2.03
 5 3 0 4.14 1.74
 5 3 0 5.55 1.43
 5 3 0 6.97 2.4
 5 -3 0 7.3 3.35
 5 3 1 178.39 11.1
 5 -3 1 147.28 13.53
 5 3 1 163.68 11.55
 5 3 1 165.38 10.95
 5 -3 1 171.63 12.55
 5 3 1 180.91 11.91
 5 3 2 4.74 1.86
 5 3 2 3.2 1.99
 5 3 2 0.7 1.39
 5 3 3 528.05 16.78
 5 3 3 508.54 22.71
 5 3 3 560.44 24.02
 5 -3 3 520.08 23.24
 5 3 4 6.6 1.93
 5 -3 4 5.97 3.01
 5 3 4 15.69 4.62
 5 3 5 483.34 12.97
 5 3 5 495.21 25.79
 5 -3 5 512.78 25.26
 5 -3 6 2.15 2.16
 5 3 6 4.43 1.16
 5 3 6 4.4 3.37
 5 3 7 33.44 8.16
 5 -3 7 26.4 6.67
 5 -3 8 17.98 6.99
 5 3 8 13.39 6.15
 5 3 9 97.58 15.27
 5 -3 9 87.21 7.29
 5 3 9 93.82 14.22
 5 -3 9 70.35 11.44
 5 3 10 1.73 4.03
 5 -3 10 6.6 4.94
 5 3 10 7.29 5.14
 5 3 11 43.86 11.24
 5 -3 11 48.2 11.04
 5 3 11 48.37 12.15
 5 3 12 6.18 5.68
 5 -3 12 2.14 4.63
 5 3 12 9.01 6.36
 5 3 13 11.81 6.99
 5 -3 13 23.39 8.52
 5 3 13 25.92 9.84
 5 3 14 6.07 5.59
 5 -3 14 15.13 7.49
 5 -5 -14 4.64 3.76
 5 -5 -13 0.94 2.23
 5 5 -12 35.05 5.89
 5 -5 -12 34.23 8.06
 5 5 -11 57.89 6.87
 5 -5 -11 61.71 10.11
 5 -5 -10 12.15 3.84
 5 -5 -10 25.36 5.5
 5 5 -10 17.82 3.64
 5 -5 -10 15.07 4.65
 5 -5 -9 127.71 12.06
 5 -5 -9 145.11 12.55
 5 -5 -9 134.76 13.46
 5 5 -9 148.92 8.91
 5 5 -9 137.29 8.4
 5 -5 -8 10.53 3.59
 5 5 -8 18.12 4.88
 5 -5 -8 11 3.93
 5 5 -8 10.2 2.07
 5 -5 -8 8.86 4.26
 5 5 -8 10.62 2.3
 5 5 -7 127.68 8.29
 5 -5 -7 129.17 12.45
 5 -5 -7 133.11 11.47
 5 5 -7 143.97 12.37
 5 -5 -7 105.4 11.08
 5 5 -7 133.28 5.49
 5 5 -7 130.08 7.44
 5 5 -6 86.82 7.95
 5 -5 -6 79.62 9.91
 5 -5 -6 71.39 8.19
 5 5 -6 78.97 9.2
 5 -5 -6 74.17 9.28
 5 -5 -6 69.1 8.97
 5 -5 -5 769.16 31.47
 5 5 -5 750.38 25.19
 5 -5 -5 778.35 28.24
 5 -5 -5 757.6 26.97
 5 5 -5 797.56 27.33
 5 -5 -5 722.69 27.33
 5 5 -5 807.24 15.29
 5 -5 -4 76.19 10.03
 5 5 -4 79.94 8.85
 5 -5 -4 75.49 8.53
 5 5 -4 63.47 7.67
 5 -5 -4 65.24 8.21
 5 5 -4 65.57 4.82
 5 -5 -3 67 8.1
 5 5 -3 72.95 8.2
 5 -5 -3 66.49 9.48
 5 5 -3 80.76 9.56
 5 5 -3 67.4 5.37
 5 5 -2 16.24 4.99
 5 5 -2 12.63 3.63
 5 5 -2 8.3 3.26
 5 -5 -2 15.13 4.89
 5 5 -2 14.11 2.35
 5 5 -2 9.42 2.33
 5 5 -1 197.43 15.68
 5 5 -1 210.33 13.1
 5 5 -1 178.4 14.06
 5 5 -1 217.6 10.71
 5 5 -1 217.19 11.47
 5 5 0 14.83 3.33
 5 5 0 21.57 5.7
 5 5 0 12.75 1.91
 5 5 0 14.29 3.51
 5 5 1 146.33 9.95
 5 5 1 156.56 15.11
 5 5 1 140.04 11.04
 5 5 2 28.74 6.87
 5 5 2 19.35 3.53
 5 5 2 25.14 5.3
 5 5 3 178.02 9.8
 5 5 3 183.52 17.26
 5 5 3 168.04 13.62
 5 5 4 35.28 8.08
 5 -5 4 30.99 6.35
 5 5 4 29.8 3.85
 5 5 4 24.38 5.71
 5 5 5 126.22 15.41
 5 5 5 140.24 14.14
 5 -5 5 127.99 12.85
 5 5 6 11.11 5.53
 5 -5 6 7.93 4.36
 5 5 6 20.73 6.74
 5 5 7 34.14 8.76
 5 -5 7 28.55 7.49
 5 5 7 28.85 7.71
 5 5 8 36.19 8.95
 5 -5 8 36.74 7.74
 5 5 8 55.53 10.78
 5 5 9 31.14 9.29
 5 -5 9 39.69 8.79
 5 5 9 48.88 10.84
 5 5 10 2.6 3.15
 5 -5 10 9.22 3.28
 5 -5 10 7.04 4.42
 5 5 10 3.44 3.62
 5 5 11 27.15 9.35
 5 5 11 23.69 8.25
 5 -5 11 23.68 7.59
 5 5 12 1.41 3.79
 5 5 12 2.26 3.37
 5 -5 12 12.49 6.9
 5 5 13 29.73 9.9
 5 -5 13 24.2 8.76
 5 5 13 20.5 8.98
 5 -5 14 9.77 6.35
 5 -7 -15 22.04 8.05
 5 -7 -14 23.7 7.82
 5 -7 -13 16.01 6.17
 5 -7 -12 31.21 7.86
 5 -7 -11 20.73 6.13
 5 -7 -10 16.09 5.69
 5 -7 -10 19.96 5.16
 5 -7 -9 70.06 10.19
 5 7 -9 82.12 4.32
 5 -7 -9 70.19 8.43
 5 -7 -8 4.98 3.79
 5 -7 -8 1.39 1.89
 5 7 -7 185.4 13.33
 5 -7 -7 173.76 15.09
 5 -7 -7 173.5 12.88
 5 7 -7 179.82 13.71
 5 -7 -7 168.07 13.6
 5 7 -6 12.44 3.57
 5 -7 -6 15.05 4.72
 5 -7 -6 7.48 2.98
 5 -7 -6 18.46 4.8
 5 7 -6 14.14 4.01
 5 7 -5 231.6 16.54
 5 -7 -5 217.66 14.4
 5 7 -5 218.31 14.28
 5 -7 -5 242.78 15.44
 5 -7 -5 245.19 16.99
 5 7 -4 -1.01 1.48
 5 7 -4 2.02 2.87
 5 -7 -4 1.84 1.52
 5 7 -4 3.14 1.22
 5 -7 -3 245.09 15.16
 5 7 -3 233.58 14.1
 5 7 -3 244.93 18.54
 5 7 -3 215.54 9.86
 5 7 -2 153.79 15.18
 5 7 -2 160.94 11.59
 5 7 -2 144.51 6.73
 5 7 -2 148.23 6.74
 5 7 -2 164.67 9.83
 5 7 -1 132.34 12.42
 5 7 -1 148.75 10.97
 5 7 -1 123.22 14.62
 5 7 -1 154.58 10.53
 5 7 0 1.83 1.19
 5 7 0 -0.32 2.08
 5 7 0 -0.14 1.95
 5 7 0 2.88 2.7
 5 7 1 162.86 17.45
 5 7 1 180.27 11.6
 5 7 1 180.46 13.34
 5 7 2 13.33 5.55
 5 7 2 13.63 3.33
 5 7 2 17.73 4.73
 5 7 3 223.62 21.49
 5 7 3 222.25 17
 5 7 4 27.73 8.19
 5 -7 4 21.95 5.43
 5 7 4 40.69 8.23
 5 7 5 90.25 14.42
 5 7 5 78.27 11.65
 5 -7 5 101.26 11.75
 5 7 6 14.71 6.27
 5 -7 6 24.34 6.11
 5 7 6 25.27 7.18
 5 7 7 46.78 11.05
 5 -7 7 40.5 7.92
 5 7 7 39.41 9.47
 5 7 8 14.59 7.02
 5 -7 8 11.12 4.55
 5 7 8 9.73 5.61
 5 7 9 14.64 7.27
 5 -7 9 13.03 5.23
 5 7 9 11.35 6.46
 5 7 10 19.66 7.37
 5 -7 10 32.16 6.62
 5 7 10 27.49 9.79
 5 -7 10 28.4 7.97
 5 7 11 14.84 7.21
 5 -7 11 29.14 8.27
 5 7 11 22.44 8.6
 5 7 12 0.94 3.48
 5 7 12 -1.2 3.5
 5 -7 12 3.88 4.62
 5 7 13 13.63 8.97
 5 -7 13 20.04 7.23
 5 -7 14 -0.05 3.68
 5 -9 -15 8.8 5.31
 5 -9 -14 0.59 3.91
 5 -9 -13 93.69 14.88
 5 -9 -12 4.63 4.36
 5 -9 -11 43.59 9.28
 5 -9 -10 3 3.44
 5 -9 -9 110.37 13.6
 5 -9 -9 92.41 9.52
 5 -9 -8 17.96 5.95
 5 -9 -8 22.94 4.85
 5 -9 -7 308.43 16.94
 5 9 -7 302.62 20.02
 5 -9 -6 2.35 2.28
 5 -9 -6 5.99 2.85
 5 9 -6 -2.64 2.4
 5 -9 -5 107.76 10.07
 5 9 -5 143.55 11.67
 5 -9 -5 138.66 10.98
 5 9 -5 141.38 14.98
 5 -9 -4 26.88 4.77
 5 9 -4 33.7 5.62
 5 -9 -4 29.67 5.17
 5 9 -4 30.99 7.11
 5 -9 -3 104.3 9.37
 5 9 -3 110.78 9.56
 5 9 -3 121.58 14.45
 5 9 -2 3.11 3.5
 5 -9 -2 12.79 3.51
 5 9 -2 8.49 2.49
 5 9 -2 10.51 2.08
 5 9 -2 9.88 3.05
 5 9 -1 49.57 6.18
 5 9 -1 47.33 9.68
 5 9 -1 48.26 6.5
 5 9 -1 59.98 6.05
 5 9 0 5.01 2.12
 5 9 0 12.2 6.63
 5 9 0 9.72 3.12
 5 9 1 113.44 9.22
 5 9 1 76.2 12.9
 5 9 1 83.69 10.04
 5 9 2 0.35 1.5
 5 9 2 -2.61 3.85
 5 9 2 4.09 3.55
 5 9 3 28.66 8.84
 5 9 3 38 7.74
 5 9 4 44 12.6
 5 9 4 19.7 6.46
 5 9 5 11.29 6.59
 5 -9 5 6.52 3.11
 5 9 5 1.91 3.35
 5 9 6 15.31 6.97
 5 -9 6 12.62 4.23
 5 9 6 16.65 5.77
 5 9 7 47.7 12.27
 5 -9 7 37.13 7.75
 5 9 7 69.68 12.7
 5 9 8 9.11 5.63
 5 -9 8 -0.87 3.1
 5 9 8 5.71 4.46
 5 9 9 80.02 16.39
 5 -9 9 83.43 12.5
 5 9 9 57.52 12.76
 5 9 10 13.26 7.64
 5 -9 10 5.07 3.54
 5 9 10 1.13 4.51
 5 -9 10 3.82 3.32
 5 9 11 35.37 11.68
 5 9 11 18.46 8.09
 5 -9 11 14.2 6.13
 5 -9 12 14.25 7.44
 5 -9 13 9.97 6.22
 5 -11 -14 18.62 8.21
 5 -11 -13 38.16 9.49
 5 -11 -12 -1.36 3.7
 5 -11 -11 50.79 10.11
 5 -11 -8 45.08 6.35
 5 -11 -7 7.06 2.73
 5 11 -7 8.73 4.26
 5 -11 -6 40.65 6.05
 5 11 -6 32.29 8.16
 5 -11 -5 47.3 6.52
 5 11 -5 50.76 10.46
 5 -11 -4 8.13 3.02
 5 11 -4 5.56 4.05
 5 11 -3 84.05 13.6
 5 11 -2 13.53 4.94
 5 11 -2 16.24 3.57
 5 11 -2 14.67 2.8
 5 11 -1 112.4 8.72
 5 11 -1 121.73 16.78
 5 11 -1 118.9 9.33
 5 11 0 18.41 3.58
 5 11 0 16.78 6.71
 5 11 0 16.02 4.12
 5 11 1 50.82 5.66
 5 11 1 59.67 12.38
 5 11 1 48.13 8.11
 5 11 1 49.08 7.62
 5 11 2 -0.97 1.15
 5 11 2 -2.1 2.16
 5 11 3 137.9 9.25
 5 11 3 122.47 18.69
 5 11 3 146.22 16.04
 5 11 4 136.2 20.38
 5 11 4 111.05 14.33
 5 11 5 139.78 21.05
 5 11 5 139.99 17.35
 5 -11 5 128.01 14.32
 5 11 6 24.62 9.63
 5 -11 6 14.85 5.61
 5 11 6 10.76 4.99
 5 11 7 36.13 11.54
 5 -11 7 32.33 7.65
 5 11 7 46.95 10.52
 5 11 8 3.15 5.79
 5 -11 8 1.87 3.03
 5 11 8 -3.27 3.13
 5 11 9 53.96 13.98
 5 -11 9 48.15 9.8
 5 -11 9 46.77 9.3
 5 11 9 43.4 12.1
 5 11 10 -8.55 6.01
 5 -11 10 2.07 3.33
 5 -11 10 7.45 4.61
 5 11 10 0.35 3.63
 5 -11 11 13.56 5.92
 5 13 -7 -1.07 2.68
 5 13 -6 20.21 7.06
 5 13 -5 77.78 13.62
 5 13 -4 3.63 5.15
 5 13 -3 57.89 12.46
 5 13 -2 46.63 11.5
 5 13 -1 118.19 18.15
 5 13 0 16.5 7.33
 5 13 1 82.63 16.06
 5 13 1 57.69 8.64
 5 13 2 1.36 3.84
 5 13 2 8.6 4.27
 5 13 3 45.32 12.86
 5 13 3 74.08 11.25
 5 13 4 1.28 4.49
 5 13 4 -3.72 3.87
 5 13 5 41.58 13.21
 5 13 5 57.48 11.33
 5 13 6 8.84 7.78
 5 -13 6 17.3 5.73
 5 13 6 1.57 3.24
 5 13 7 9.82 6.09
 5 -13 7 6.17 4.34
 5 13 7 11.89 6.02
 5 -13 8 -0.57 2.08
 5 13 8 8.29 6.3
 5 -13 9 20.02 7.41
 5 13 9 15.59 8.02
 5 -13 10 4.87 4.06
 5 15 -7 24.37 8.25
 5 15 -6 14.01 7.01
 5 15 -5 49.08 11.65
 5 15 -4 -1.5 2.86
 5 15 -3 36.37 10.97
 5 15 -2 0.48 4.11
 5 15 -1 6.64 4.34
 5 15 0 18.55 10.21
 5 15 1 39.36 11.63
 5 15 2 -0.32 4.6
 5 15 3 78.04 17.11
 5 15 4 -0.05 3.94
 5 -15 5 32.66 8.04
 5 15 8 11.05 6.9
 5 17 -6 11.34 6.15
 5 17 -5 28.1 10.37
 5 17 -4 0.67 4.76
 5 17 -3 29.12 10.44
 5 17 -2 1 4.91
 5 17 -1 20.09 9.48
 5 17 0 7.92 6.37
 6 0 -16 11.95 6.36
 6 0 -15 8.12 5.43
 6 0 -11 14.46 5.39
 6 0 -10 87.34 11.14
 6 0 -9 2.01 2.39
 6 0 -8 62.7 8.97
 6 0 -7 2.54 2.7
 6 0 -7 -0.03 0.96
 6 0 -6 55.84 8.12
 6 0 -5 1.14 2.51
 6 0 -5 0.05 1.63
 6 0 -5 0.69 1.59
 6 0 -5 0.58 1.76
 6 0 -4 292.84 17.85
 6 0 -4 334.31 14.68
 6 0 -4 320.82 16.79
 6 0 -4 295.18 16.23
 6 0 -3 1.27 1.59
 6 0 -3 3.22 2.33
 6 0 -3 -0.29 1.59
 6 0 -2 5621.6 63.19
 6 0 -2 5426.91 74.3
 6 0 -2 5398.31 60.92
 6 0 -1 3.49 2.51
 6 0 -1 -0.77 1.23
 6 0 -1 3.33 2.61
 6 0 0 506.92 23.21
 6 0 0 502.46 20.19
 6 0 0 496.84 23.78
 6 0 0 538.81 22
 6 0 1 -1.3 2.09
 6 0 1 0.56 1.3
 6 0 1 0.73 1.42
 6 0 1 -0.68 1.2
 6 0 2 170.86 12.78
 6 0 2 183.69 14.05
 6 0 3 -0.04 2.01
 6 0 3 1.22 2.01
 6 0 4 40.39 7.68
 6 0 4 25.23 4.67
 6 0 5 1.21 1.02
 6 0 5 -3.77 2.12
 6 0 6 82.86 7.9
 6 0 6 75.57 11.15
 6 0 7 -0.59 0.91
 6 0 7 -1.68 2.22
 6 0 8 0.95 2.45
 6 0 9 5.77 4.76
 6 0 10 22.43 8.05
 6 0 11 9.84 6.55
 6 0 12 28.22 9.42
 6 0 13 -4.48 4.09
 6 -2 -17 -0.43 3.11
 6 -2 -16 30.6 8.7
 6 2 -14 34.04 7.66
 6 2 -13 49.46 8.88
 6 2 -12 102.68 11.76
 6 -2 -11 7.33 4.33
 6 -2 -10 175.98 15.21
 6 2 -10 197.15 16.23
 6 2 -9 4.66 3.99
 6 -2 -9 4.2 3.05
 6 -2 -9 3.14 1.38
 6 2 -9 0.08 1.42
 6 -2 -8 81.32 7.04
 6 -2 -8 94.81 10.64
 6 2 -8 81.76 10.09
 6 -2 -7 4.5 2.33
 6 -2 -7 2.31 1.83
 6 2 -7 1.09 0.67
 6 2 -7 5.36 3.2
 6 -2 -7 -1.79 2.61
 6 -2 -6 148.92 11.15
 6 2 -6 142.6 8.46
 6 -2 -6 143.99 13.1
 6 2 -6 164.31 13.8
 6 2 -6 157.78 8.92
 6 -2 -6 135.16 11.96
 6 -2 -6 157.69 13.94
 6 2 -5 2.34 2.17
 6 -2 -5 0.91 1.71
 6 2 -5 0.47 1.02
 6 2 -5 1.88 1.15
 6 -2 -5 -1.46 1.28
 6 -2 -5 -0.39 1.47
 6 2 -5 5.57 1.95
 6 -2 -4 50.17 7.57
 6 2 -4 52.14 7.51
 6 2 -4 43.45 5.42
 6 -2 -4 45.3 6.68
 6 -2 -4 47.82 6.18
 6 2 -4 49.35 4.84
 6 -2 -4 39.85 6.76
 6 2 -3 95.93 10.17
 6 2 -3 106.24 8.78
 6 -2 -3 113.63 9.63
 6 -2 -3 112.81 9.99
 6 2 -3 97.72 8.59
 6 -2 -3 97.74 10.69
 6 2 -3 95.47 6.91
 6 -2 -2 251.04 14.41
 6 2 -2 225.48 13.69
 6 -2 -2 226.29 13.63
 6 2 -2 231.79 12.38
 6 -2 -2 199.1 15.66
 6 2 -2 203.63 10.72
 6 2 -1 385.33 19.58
 6 2 -1 375.28 14.6
 6 -2 -1 401.1 22.4
 6 2 -1 397.48 16.06
 6 2 -1 366.42 18.31
 6 -2 -1 408.03 18.61
 6 2 -1 400.84 17.67
 6 2 0 3.81 2.12
 6 2 0 7.67 2.59
 6 -2 0 7.03 2.69
 6 2 0 8.9 2.86
 6 2 0 6.87 2.83
 6 2 1 3.31 1.95
 6 2 1 11.25 3.76
 6 2 1 7.38 2.7
 6 2 1 8.69 3.25
 6 2 2 181.76 12.24
 6 2 2 165.32 13.84
 6 2 2 204.24 14.42
 6 2 2 196.99 14.65
 6 -2 2 201.5 14.96
 6 2 3 11.99 3.15
 6 -2 3 13.21 4.16
 6 2 3 15.09 4.67
 6 2 4 136.45 9.62
 6 2 4 140.62 13.83
 6 -2 4 145.45 13.93
 6 2 5 1.54 1.05
 6 -2 5 1.8 3.05
 6 2 5 3.14 3.32
 6 2 6 171.08 8.64
 6 2 6 203.58 18.31
 6 -2 6 170.98 16.16
 6 2 7 4.16 3.95
 6 -2 7 3.72 3.5
 6 2 8 84.63 13.37
 6 -2 8 61.66 11.06
 6 -2 9 74.37 12.37
 6 2 9 53.25 11.19
 6 2 10 42.81 10.71
 6 -2 10 57.15 11.86
 6 2 11 -3.57 3.17
 6 -2 11 -1.93 3.94
 6 2 12 60.03 13.8
 6 -2 12 77.04 14.83
 6 2 12 64.22 14.35
 6 2 13 3.07 4.71
 6 -2 13 -4.64 4.13
 6 -4 -13 5.35 4.43
 6 -4 -12 80.64 12.5
 6 4 -12 93.24 10
 6 -4 -11 6.41 3.86
 6 4 -11 8.49 3.07
 6 -4 -11 2.5 3.19
 6 -4 -10 143.47 13.7
 6 4 -10 201.11 16.76
 6 -4 -10 163.58 15.54
 6 4 -10 155.52 11.14
 6 -4 -9 7.39 3.74
 6 -4 -9 10.86 3.46
 6 4 -9 17.24 5.15
 6 4 -9 13.88 3.27
 6 -4 -9 6.49 3.36
 6 4 -9 10.34 3.15
 6 -4 -8 66.52 8.39
 6 -4 -8 58.14 8.55
 6 4 -8 60.45 8.81
 6 -4 -8 53.59 8.55
 6 4 -8 62.91 7.1
 6 4 -7 21.64 3.27
 6 -4 -7 27.87 5.7
 6 -4 -7 13.73 4.57
 6 4 -7 20.01 2.66
 6 4 -7 23.27 5.53
 6 -4 -7 29.03 5.83
 6 -4 -6 82.29 9.91
 6 4 -6 91.54 8.13
 6 -4 -6 85.79 10.09
 6 4 -6 76.65 4.61
 6 -4 -6 84.65 9.86
 6 4 -6 93.53 10.34
 6 -4 -5 2.1 2.94
 6 4 -5 0.29 2.02
 6 4 -5 1.97 2.3
 6 -4 -5 1.85 1.85
 6 -4 -5 1.1 2.36
 6 4 -5 0.39 0.55
 6 -4 -4 196.98 16.11
 6 4 -4 178.27 13.23
 6 4 -4 189.2 14.48
 6 -4 -4 198.25 14.51
 6 4 -4 184.6 7.53
 6 4 -4 183.69 8.02
 6 4 -4 195.38 10.67
 6 4 -3 3.18 1.99
 6 4 -3 2.73 2.55
 6 4 -3 11.77 4.1
 6 -4 -3 5.32 2.81
 6 4 -3 6.92 1.87
 6 4 -3 7.39 1.98
 6 4 -2 116.83 12.25
 6 4 -2 75.24 8.7
 6 4 -2 115.9 8.68
 6 4 -2 111.8 8.32
 6 4 -2 111.49 7.36
 6 4 -2 103.03 8.31
 6 4 -1 33.73 5.12
 6 4 -1 31.95 6.78
 6 4 -1 32.22 4.45
 6 4 -1 34.5 4.2
 6 4 -1 27.73 4.58
 6 4 0 197.16 13.24
 6 4 0 198.18 16.4
 6 4 0 191.31 12.84
 6 4 0 175.94 11.33
 6 4 0 192.25 12.89
 6 4 1 2.38 1.86
 6 4 1 3.34 2.75
 6 4 1 2.53 1.63
 6 4 1 1.24 1.31
 6 4 1 2.04 2.36
 6 4 2 75.11 7.52
 6 4 2 74.94 11.1
 6 4 2 61.71 7.84
 6 4 2 70.44 8.69
 6 4 3 5.11 4.06
 6 4 3 1.08 1.44
 6 -4 3 1.96 2.63
 6 4 3 2.57 2.85
 6 4 4 108.99 14.35
 6 4 4 107.56 7.82
 6 4 4 118.51 12.9
 6 -4 4 119.83 12.64
 6 4 5 3.11 3.6
 6 -4 5 4.68 3.46
 6 4 5 6.55 1.72
 6 4 5 9.32 4.81
 6 4 6 180.16 7.81
 6 4 6 206.58 21.3
 6 4 6 173 17.2
 6 -4 6 185.5 17.24
 6 4 7 6.14 4.31
 6 -4 7 6.94 4.01
 6 4 7 1.91 3.81
 6 4 8 21.58 7.5
 6 4 8 32.26 8.67
 6 -4 8 36.16 8.96
 6 4 9 1.65 3.36
 6 -4 9 -2.08 2.45
 6 4 10 45.59 11.7
 6 -4 10 52.21 10.69
 6 4 10 78.49 14.82
 6 4 11 -2.42 4.18
 6 4 11 1.7 3.91
 6 -4 11 2.7 2.52
 6 4 12 19.49 7.53
 6 -4 12 6.08 5.02
 6 4 12 18.81 8.25
 6 4 13 7.25 6.04
 6 -4 13 4.27 3.36
 6 -6 -15 2.23 4.28
 6 -6 -14 24.99 8.21
 6 -6 -13 -0.83 2.49
 6 -6 -12 47.03 10.03
 6 -6 -11 8.25 3.87
 6 -6 -11 10.83 4.91
 6 -6 -10 33.93 6.78
 6 -6 -10 29.14 6.84
 6 -6 -9 6.27 4.69
 6 -6 -9 10.63 4.24
 6 6 -9 14.15 5.49
 6 -6 -9 10.34 4.01
 6 6 -8 132.92 8.96
 6 -6 -8 128.91 13.97
 6 -6 -8 145.74 12.98
 6 6 -8 141.54 13.24
 6 -6 -8 125.35 13.21
 6 6 -8 129.48 6.72
 6 6 -7 2.58 2.18
 6 6 -7 1.52 0.86
 6 -6 -7 2.27 2.17
 6 6 -7 5.26 3.56
 6 -6 -7 3.19 3.27
 6 6 -7 1.61 1.09
 6 6 -6 202.94 14.21
 6 -6 -6 195.26 15.17
 6 6 -6 222.18 15.87
 6 -6 -6 182.58 15.34
 6 6 -6 188.86 7.71
 6 6 -5 1.05 1.31
 6 -6 -5 3.53 1.96
 6 6 -5 5.39 2.75
 6 -6 -5 2.9 2.64
 6 6 -5 2.92 1.29
 6 -6 -4 196.25 15.39
 6 6 -4 209.01 14.89
 6 6 -4 197.63 16
 6 6 -4 177.74 9.1
 6 6 -3 7.32 3.36
 6 6 -3 1.72 2.3
 6 -6 -3 1.55 1.5
 6 6 -3 7.02 2.38
 6 6 -3 4.15 1.07
 6 6 -2 10.76 4.46
 6 6 -2 12.78 4.05
 6 6 -2 10.48 2.83
 6 6 -2 8.22 2.22
 6 6 -1 1.83 1.61
 6 6 -1 1.94 2.07
 6 6 -1 7.49 1.99
 6 6 -1 1.8 1.96
 6 6 -1 2.55 1.65
 6 6 0 101.97 13.03
 6 6 0 92.61 8.49
 6 6 0 92.63 5.03
 6 6 0 94.76 9.17
 6 6 1 3.27 3.04
 6 6 1 0.17 2.4
 6 6 2 185.78 11.8
 6 6 2 181.85 18.33
 6 6 2 169.91 14.21
 6 6 3 7.37 4.94
 6 6 3 3.45 2.15
 6 6 3 5.5 3.33
 6 6 4 160.59 18.66
 6 6 4 163.45 9.87
 6 6 4 162.63 15.49
 6 -6 4 187.45 16.46
 6 6 5 3.82 3.93
 6 -6 5 1.23 1.81
 6 6 5 3.69 3.59
 6 6 6 44.42 10.59
 6 -6 6 75.32 11.45
 6 6 6 72.9 11.85
 6 6 7 -3.4 2.73
 6 -6 7 0.46 2.22
 6 6 7 4.18 4.28
 6 6 8 14.66 7.06
 6 -6 8 4.28 3.41
 6 6 8 14.95 6.78
 6 6 9 2.57 3.84
 6 6 9 3.49 4.15
 6 -6 9 13.25 6.19
 6 6 10 44.66 11.57
 6 6 10 33 9.85
 6 -6 10 57.03 11.51
 6 6 11 6.29 5.27
 6 -6 11 -3.15 4.66
 6 6 11 -0.01 4.59
 6 6 12 51.44 13.27
 6 -6 12 42.72 10.63
 6 -8 -14 7.8 4.84
 6 -8 -13 12.95 5.78
 6 -8 -12 62.14 11.45
 6 -8 -11 16.91 5.97
 6 -8 -11 17.03 5.29
 6 -8 -10 48.04 9.48
 6 -8 -10 47.43 7.73
 6 -8 -9 -0.42 1.91
 6 -8 -9 3.8 2.83
 6 8 -8 162.75 12.81
 6 -8 -8 161.16 15.76
 6 -8 -8 140.69 12.74
 6 8 -7 6.77 3.45
 6 -8 -7 0.48 3.08
 6 8 -7 5 3.37
 6 -8 -7 8.59 3.81
 6 8 -6 59.22 8.35
 6 -8 -6 65.65 8.74
 6 8 -6 80.76 10.44
 6 8 -5 3.11 2.76
 6 -8 -5 -0.76 2.18
 6 8 -5 1.55 2.06
 6 -8 -5 1.52 1.79
 6 8 -4 101.45 12.91
 6 -8 -4 65.54 8.67
 6 8 -4 63.54 8.24
 6 8 -4 63.46 5.33
 6 8 -3 21.63 6.45
 6 8 -3 30.07 5.63
 6 -8 -3 25.41 5.51
 6 8 -3 31.8 4.55
 6 8 -2 236.47 20.83
 6 -8 -2 217.47 16.23
 6 8 -2 232.55 15.12
 6 8 -2 224.82 9.43
 6 8 -2 223.42 9.13
 6 8 -2 201.06 12.4
 6 8 -1 66.92 8.15
 6 8 -1 78.39 12.6
 6 8 -1 49.6 6.92
 6 8 0 58.94 11.61
 6 8 0 52.9 7.04
 6 8 0 51.41 3.36
 6 8 0 63.87 8.35
 6 8 1 16.33 6.91
 6 8 1 9.93 4.27
 6 8 2 88.43 15.13
 6 8 2 72.15 10.39
 6 8 3 9.07 6.75
 6 8 3 6.63 4.2
 6 8 4 74.12 13.87
 6 -8 4 74.87 10.89
 6 8 4 67.76 10.95
 6 8 5 0.31 2.88
 6 -8 5 3.33 3
 6 8 5 0.65 3.14
 6 8 6 58.61 12.87
 6 -8 6 77.33 11.48
 6 8 6 49.79 10.36
 6 8 7 4.33 4.02
 6 -8 7 6.65 3.69
 6 8 7 6.11 3.2
 6 8 8 54.03 13.41
 6 -8 8 66.4 11.23
 6 8 8 55.44 11.69
 6 -8 9 16.33 6.01
 6 8 9 9.7 6.76
 6 8 10 0.67 3.02
 6 -8 10 6.58 5.01
 6 8 10 2.04 4.57
 6 8 11 3.89 4.45
 6 8 11 0.49 3.8
 6 -8 11 2.94 3.43
 6 -8 12 9.61 6.21
 6 -10 -13 4.55 3.42
 6 -10 -12 45.87 10.15
 6 -10 -11 -0.68 3.57
 6 -10 -10 32.13 8.48
 6 -10 -10 57.5 8.34
 6 -10 -9 8.58 3.76
 6 -10 -8 100.38 10.49
 6 10 -8 86.08 11.03
 6 -10 -7 17.4 4.4
 6 10 -7 15.51 5.36
 6 -10 -6 61.16 8.36
 6 10 -6 45.67 8.93
 6 10 -5 2.99 2.43
 6 -10 -5 2.03 1.59
 6 10 -5 5 4.08
 6 10 -4 40.83 6.67
 6 10 -4 47.58 10.71
 6 10 -3 2.75 2.56
 6 10 -3 5.87 2.72
 6 10 -2 137.22 11.28
 6 10 -2 122.62 16.66
 6 10 -2 117.42 6.6
 6 10 -2 122.23 10.02
 6 10 -1 2.54 3.21
 6 10 -1 1.11 1.34
 6 10 -1 0.54 1.09
 6 10 -1 -1.48 2.23
 6 10 0 26.52 4.93
 6 10 0 37.06 10.53
 6 10 0 23.72 5.38
 6 10 1 7.24 5.23
 6 10 1 1.73 1.59
 6 10 1 4.06 3.41
 6 10 2 54.53 12.14
 6 10 2 52.34 6.98
 6 10 2 61.48 9.77
 6 10 3 -2.81 4.65
 6 10 3 4.45 3.69
 6 10 4 64.18 14.25
 6 10 4 46.45 9.58
 6 10 5 15.65 8.11
 6 -10 5 4.32 4.07
 6 10 5 12.74 6.11
 6 10 6 57.78 14.25
 6 -10 6 42.17 8.88
 6 10 6 30 8.49
 6 10 7 9.11 7.36
 6 -10 7 6.23 4.44
 6 10 7 5.85 5.13
 6 10 8 44.97 12.41
 6 -10 8 45.93 9.69
 6 10 8 20.34 7.72
 6 -10 9 2.5 4.1
 6 10 9 -3.48 5.35
 6 -10 10 13.43 6.21
 6 10 10 5.89 5.6
 6 -10 11 10.67 6.39
 6 12 -7 -0.27 2.31
 6 12 -6 31.38 8.48
 6 -12 -5 0.8 2.38
 6 12 -5 -1.08 3.98
 6 -12 -4 62.97 8.62
 6 12 -4 93.63 15.03
 6 12 -3 24.68 4.92
 6 12 -3 24.86 8
 6 12 -2 128.84 10.51
 6 12 -2 106.9 16.7
 6 12 -1 14.33 6.35
 6 12 -1 9.01 3.03
 6 12 0 119.46 18.75
 6 12 1 8.99 6.25
 6 12 1 5.77 3.34
 6 12 2 41.84 12.34
 6 12 2 44.27 8.69
 6 12 2 56.34 8.84
 6 12 3 4.66 5.05
 6 12 3 1.98 2.2
 6 12 4 11.67 7.66
 6 12 4 19.73 6.75
 6 12 5 7.55 7.08
 6 -12 5 6.14 3.67
 6 12 5 2.16 3.51
 6 12 6 31.05 11.46
 6 -12 6 20.59 6.48
 6 12 6 19.28 7.12
 6 12 7 1.7 6.17
 6 -12 7 9.44 5.22
 6 12 7 4.1 4.88
 6 -12 8 15.78 6.05
 6 12 8 28.12 9.57
 6 -12 9 8.56 5.19
 6 12 9 7.47 7.4
 6 -12 10 26.6 9.2
 6 14 -6 28.31 8.8
 6 14 -5 9.98 5.84
 6 14 -4 22.26 8.19
 6 14 -3 4.64 4.45
 6 14 -2 36.2 10.66
 6 14 -1 2.64 4.11
 6 14 0 37.29 10.89
 6 14 1 8.92 6.39
 6 14 2 19.88 8.71
 6 14 3 9.06 6.14
 6 14 4 19.69 9.44
 6 -14 5 -0.64 2.55
 6 14 5 5.91 6.33
 6 -14 6 57.25 11.38
 6 -14 7 -0.14 2.81
 6 16 -5 6.44 5.61
 6 16 -4 17.86 7.93
 6 16 -3 4.33 3.38
 6 16 -2 35.58 11.6
 6 16 -1 16.03 8.69
 6 16 0 16.42 9.01
 6 16 1 13.49 8.84
 7 -1 -16 -0.81 3.61
 7 1 -14 -0.57 2.64
 7 -1 -12 4.3 3.81
 7 1 -12 12.75 5.3
 7 -1 -11 23.56 6.04
 7 1 -11 25.84 6.88
 7 -1 -10 4.61 3.8
 7 1 -10 -0.78 2.61
 7 -1 -9 126.21 13.22
 7 1 -9 114.68 13.01
 7 -1 -8 72.41 6.28
 7 -1 -8 70.69 9.5
 7 -1 -8 70.29 10.06
 7 1 -8 71.61 10.28
 7 -1 -7 61.82 6.81
 7 1 -7 80.92 6.16
 7 -1 -7 64.05 9.72
 7 1 -7 48.58 8.34
 7 1 -7 66.38 6.94
 7 -1 -7 71.66 9.38
 7 1 -6 2.49 3.01
 7 -1 -6 5.23 2.84
 7 -1 -6 4.3 2.2
 7 -1 -6 1.53 2.61
 7 1 -6 4.82 1.98
 7 1 -6 3.87 2.41
 7 -1 -5 79.23 10.12
 7 1 -5 73.99 9.99
 7 1 -5 77.63 7.22
 7 -1 -5 76.96 8.24
 7 1 -5 101.02 10.24
 7 -1 -5 68.86 8.57
 7 -1 -5 67.94 9.04
 7 1 -5 74.81 8.35
 7 -1 -4 16.19 4.38
 7 1 -4 22.41 5.32
 7 1 -4 18.93 3.79
 7 -1 -4 26.13 5.01
 7 -1 -4 23.12 4.95
 7 1 -4 27.98 5.47
 7 1 -4 24.26 5.09
 7 -1 -4 20.25 4.99
 7 1 -3 144.72 12.33
 7 -1 -3 159.39 14.21
 7 -1 -3 141.59 11.58
 7 1 -3 148.87 11.46
 7 1 -3 155.11 10.5
 7 -1 -3 149.85 11.34
 7 -1 -2 6.81 2.78
 7 1 -2 7.74 2.75
 7 1 -2 7.87 2.43
 7 1 -2 7.73 3.23
 7 1 -1 128.78 12.63
 7 1 -1 147.42 11.2
 7 1 -1 145.19 12.04
 7 1 0 12.54 4.09
 7 1 0 10.55 3.37
 7 1 1 213.86 15.59
 7 -1 1 219.61 16.16
 7 1 2 8.2 3.27
 7 1 2 5.8 3.61
 7 -1 2 1.59 2.06
 7 1 3 23.3 5.26
 7 1 3 12.91 3.97
 7 -1 3 17.95 5.01
 7 1 4 1.17 1.84
 7 1 4 0.07 2.18
 7 -1 4 -1.51 2.14
 7 -1 4 0.33 2.11
 7 -1 5 85.11 11.8
 7 1 5 64.05 7.61
 7 -1 5 66.98 8.38
 7 1 5 51.2 9.81
 7 1 6 9.8 4.79
 7 -1 6 7.7 4.4
 7 -1 7 63.63 11.21
 7 1 7 46.48 10.15
 7 1 8 7.1 4.83
 7 -1 8 6.55 5.71
 7 -1 9 138.17 18
 7 1 9 115 16.88
 7 1 10 10 6.61
 7 -1 10 15.66 7.17
 7 1 11 3.36 3.75
 7 -1 11 4.99 5.53
 7 -3 -13 40.19 9.56
 7 -3 -12 9.13 4.34
 7 -3 -12 7.72 4.54
 7 -3 -11 32.75 7.75
 7 -3 -11 32.8 7.3
 7 3 -11 40.79 8.4
 7 -3 -10 0.85 2.76
 7 -3 -10 0.79 1.94
 7 3 -10 7.59 4.72
 7 -3 -9 255.26 19.02
 7 -3 -9 219.87 17.79
 7 3 -9 221.4 17.93
 7 -3 -8 2.35 2.34
 7 -3 -8 1.7 1.98
 7 3 -8 2.45 1.32
 7 3 -8 0.42 2.13
 7 -3 -8 -2.11 3.1
 7 -3 -7 278.86 17.43
 7 3 -7 271.97 12.66
 7 3 -7 272.12 11.64
 7 -3 -7 265.01 18.37
 7 -3 -7 287.59 20.28
 7 3 -7 275.25 19.17
 7 -3 -6 2.53 2.06
 7 3 -6 3.77 3.1
 7 3 -6 3.75 1.97
 7 -3 -6 3.42 2.42
 7 3 -6 4.37 1.45
 7 -3 -6 3.89 2.35
 7 3 -5 91.86 9.28
 7 -3 -5 87.76 11.05
 7 3 -5 94.52 11.2
 7 -3 -5 90.17 10.37
 7 3 -5 81.19 6.45
 7 3 -5 70.22 6.71
 7 3 -4 2.54 2.44
 7 3 -4 -1.13 1.84
 7 -3 -4 0.14 2.07
 7 3 -4 2.39 2.16
 7 3 -4 2.29 1.43
 7 3 -4 -0.8 1.28
 7 3 -3 115.71 11.54
 7 3 -3 104.87 11.36
 7 3 -3 111.35 9.63
 7 3 -3 119.42 9.68
 7 3 -3 109.98 8.21
 7 3 -3 107.96 9.43
 7 3 -2 7.4 2.86
 7 3 -2 11.47 2.91
 7 3 -2 11.34 3.06
 7 3 -2 12.24 3.33
 7 3 -1 206.44 11.19
 7 3 -1 189.56 12.33
 7 3 -1 207.42 14.86
 7 3 -1 202.85 13.99
 7 3 0 32.98 5.96
 7 3 0 35.65 5.76
 7 3 0 38.34 6.78
 7 3 1 132.41 11.72
 7 3 1 165.43 13.62
 7 3 2 14.92 3.89
 7 -3 2 8.52 4.07
 7 3 2 12.61 4.25
 7 3 3 5.12 2.53
 7 -3 3 0.92 2.55
 7 3 3 4.88 3.13
 7 3 4 -2.05 1.97
 7 -3 4 2.2 3.04
 7 3 4 3.37 3.14
 7 3 5 44.83 5.48
 7 -3 5 40.89 8.64
 7 3 5 51.9 9.69
 7 -3 6 1.46 3.47
 7 3 6 5.21 3.59
 7 -3 7 63.82 11.53
 7 3 7 68.98 11.77
 7 3 8 -3.52 3.73
 7 -3 8 0.38 3.93
 7 3 9 14.46 6.53
 7 -3 9 17.6 6.78
 7 3 10 8.76 6.1
 7 3 10 4.07 5.85
 7 -3 10 11.5 6.63
 7 3 11 2.51 3.34
 7 -3 11 3.43 4.65
 7 -5 -14 -1.66 3
 7 -5 -13 20.49 7.12
 7 -5 -12 18.36 6.62
 7 -5 -12 10.73 4.27
 7 -5 -11 14.08 5.17
 7 -5 -11 22.67 5.89
 7 -5 -10 5.93 3.68
 7 -5 -10 7.49 3.56
 7 5 -10 6.29 3.78
 7 -5 -9 54.76 8.98
 7 5 -9 71.84 10.57
 7 -5 -9 64.3 9.59
 7 5 -8 29.76 3.97
 7 -5 -8 28.93 7.01
 7 5 -8 29.57 2.94
 7 -5 -8 26.41 6.04
 7 -5 -8 18.98 5.38
 7 5 -8 27.47 6.53
 7 -5 -7 83.8 10.97
 7 5 -7 61.54 7.19
 7 -5 -7 84.31 10.82
 7 5 -7 75.31 3.85
 7 5 -7 78.31 3.65
 7 5 -7 57.66 8.8
 7 -5 -7 84.91 11.02
 7 5 -6 5.35 2.13
 7 5 -6 3.33 2.45
 7 5 -6 6.36 3.33
 7 -5 -6 2.78 3.22
 7 5 -6 3.32 0.78
 7 -5 -6 2.37 2.56
 7 5 -5 85.93 10.21
 7 5 -5 93.99 11.07
 7 -5 -5 87.46 11.24
 7 -5 -5 74.69 10.07
 7 5 -5 77.17 4.13
 7 5 -5 77.19 7.07
 7 5 -4 2.99 1.56
 7 5 -4 4.34 3.2
 7 5 -4 2.99 2.39
 7 5 -4 1.32 0.71
 7 5 -4 2.21 1.1
 7 5 -3 55.94 8.78
 7 5 -3 47.38 7.36
 7 5 -3 62.28 5.85
 7 5 -3 50.04 4.86
 7 5 -3 60.58 6.71
 7 5 -2 1.85 2.07
 7 5 -2 6.45 2.99
 7 5 -2 0.62 1.95
 7 5 -2 1.34 1.57
 7 5 -2 -0.3 1.05
 7 5 -2 0.89 1.35
 7 5 -1 98.94 12.48
 7 5 -1 96.62 7.08
 7 5 -1 106.15 9.88
 7 5 -1 97.85 8.48
 7 5 -1 109.75 10.17
 7 5 0 26.89 6.86
 7 5 0 26.54 5
 7 5 0 27.31 5.38
 7 5 0 25.85 5.32
 7 5 1 167.78 17.45
 7 5 1 128.74 12.07
 7 5 1 152.64 12.52
 7 5 1 156.2 13.22
 7 5 2 40.92 8.99
 7 5 2 32.05 6.53
 7 5 3 104.98 14.83
 7 5 3 88.95 8.36
 7 5 3 95.62 11.89
 7 -5 3 115.72 13.26
 7 5 4 54.99 11.83
 7 -5 4 22.45 6.29
 7 5 4 32.74 4.71
 7 5 4 38.2 7.95
 7 5 5 110.34 16.59
 7 5 5 120.67 14.5
 7 -5 5 113.97 14.46
 7 -5 6 0.39 2.41
 7 5 6 7.23 4.44
 7 5 7 22.74 8.2
 7 -5 7 34.53 8.45
 7 5 7 50.77 10.87
 7 5 8 23.76 9.3
 7 5 8 20.32 8.19
 7 -5 8 15.69 6.21
 7 5 9 12.38 6.43
 7 5 9 11.38 6.96
 7 -5 9 8.81 6.02
 7 5 10 11.96 7.11
 7 -5 10 -1.29 3.88
 7 5 10 4.68 4.34
 7 5 11 28.73 10.32
 7 -5 11 9.09 6.07
 7 5 11 17.58 9.09
 7 -7 -14 13.41 6.47
 7 -7 -13 4.16 3.71
 7 -7 -12 7.31 5.18
 7 -7 -12 3.9 3.4
 7 -7 -11 25.14 6.96
 7 -7 -11 26.64 6.32
 7 -7 -10 6.94 4.57
 7 -7 -10 15.84 4.93
 7 -7 -9 76.78 11.25
 7 7 -9 65.25 10.01
 7 -7 -9 49.2 8.3
 7 -7 -8 11.63 4.98
 7 7 -8 16.18 5.1
 7 -7 -8 1.88 1.92
 7 7 -7 68.64 9.07
 7 -7 -7 68.19 9.61
 7 7 -7 60.11 9.06
 7 -7 -7 84.82 11.49
 7 7 -6 14.13 4.86
 7 7 -6 5.26 2.4
 7 -7 -6 3.19 3.05
 7 7 -6 11.61 2.2
 7 -7 -5 153.94 14.64
 7 7 -5 124.67 12.46
 7 7 -5 136.98 14.26
 7 7 -5 133.98 8.25
 7 7 -4 -2.33 2.31
 7 7 -4 3.63 3.51
 7 7 -4 2.27 1.7
 7 7 -3 81.13 10.11
 7 7 -3 75.66 11.53
 7 7 -3 56.09 3.78
 7 7 -3 64.85 6.95
 7 7 -2 16.65 6.23
 7 7 -2 9.18 3.79
 7 7 -2 8.83 2.35
 7 7 -2 14.72 3.95
 7 7 -1 135.59 16.67
 7 7 -1 117.08 11.66
 7 7 -1 132.11 7.67
 7 7 -1 142.88 10.59
 7 7 -1 122.25 10.86
 7 7 0 1.84 4.07
 7 7 0 1.68 2.16
 7 7 0 -1.03 1.83
 7 7 1 90.81 14
 7 7 1 73.34 8.72
 7 7 1 71.64 9.4
 7 7 2 28.95 9.06
 7 7 2 31.38 6.98
 7 7 3 111.45 16.59
 7 7 3 109.58 12.93
 7 7 4 3.98 4.01
 7 -7 4 -0.91 2.89
 7 7 4 2.45 3.56
 7 7 5 39.35 10.59
 7 -7 5 47.26 9.65
 7 7 5 49.17 9.87
 7 7 6 4.08 2.81
 7 -7 6 10.96 4.9
 7 7 6 17.69 7.85
 7 7 7 17.95 7.7
 7 -7 7 23.01 7.18
 7 7 7 40.66 10.76
 7 7 8 8.18 6.21
 7 -7 8 9.53 5.21
 7 7 8 1.97 3.56
 7 7 9 13.53 7.28
 7 7 9 4.4 4.41
 7 -7 9 5.22 4.29
 7 7 10 3.7 4.46
 7 -7 10 22.58 7.8
 7 7 10 16 7.86
 7 -7 11 5.36 4.52
 7 -9 -13 41.76 9.98
 7 -9 -12 -0.88 3.63
 7 -9 -11 25.62 7.61
 7 -9 -11 24.86 6.11
 7 -9 -10 4.63 4.38
 7 -9 -10 1.6 2.64
 7 -9 -9 16.74 6.22
 7 -9 -9 32.26 6.65
 7 9 -8 22.67 6.34
 7 -9 -8 14.66 4.51
 7 -9 -7 7.03 3.9
 7 9 -7 1.03 2.02
 7 -9 -6 -0.15 1.68
 7 9 -6 2.67 3.02
 7 9 -6 5.59 3.49
 7 9 -5 43.36 7.71
 7 9 -5 47.92 9.51
 7 -9 -5 43.38 8.07
 7 9 -4 -2.32 3.58
 7 9 -4 3.32 2.66
 7 9 -3 48.84 10.31
 7 9 -3 47.83 7.99
 7 9 -3 50.24 6.23
 7 9 -2 0.98 2.15
 7 9 -2 -0.31 2.72
 7 9 -2 5.93 3.01
 7 9 -1 48.64 7.34
 7 9 -1 62.92 12.14
 7 9 -1 38.29 6.72
 7 9 0 19.65 7.69
 7 9 0 18.63 4.94
 7 9 0 13.77 4.74
 7 9 1 60.33 8.35
 7 9 1 88.54 15.4
 7 9 1 76.66 10.51
 7 9 2 4.79 6.17
 7 9 2 5.2 4.44
 7 9 3 171.14 22.64
 7 9 3 189.24 17.9
 7 9 4 16.67 8.5
 7 -9 4 18.33 6.27
 7 9 4 12.18 5.72
 7 9 5 75.77 15.99
 7 -9 5 76.97 12.59
 7 9 5 63.94 11.63
 7 9 6 6.51 5.23
 7 -9 6 6.22 4.58
 7 9 6 -3.98 3.46
 7 9 7 56.55 14.17
 7 -9 7 34.53 9.01
 7 9 7 55.94 12.02
 7 9 8 6.47 6.82
 7 -9 8 7.6 4.9
 7 9 8 -3.58 3.62
 7 9 9 30.88 11.35
 7 -9 9 31.01 8.73
 7 9 9 29.04 9.89
 7 -9 10 5.6 6.27
 7 -11 -8 64.98 9.2
 7 -11 -7 94.01 10.98
 7 11 -6 8.25 4.37
 7 -11 -6 1.96 2.77
 7 11 -6 1.54 2.01
 7 -11 -5 40.23 7.55
 7 11 -5 48.93 7.78
 7 11 -5 52.26 11.04
 7 11 -4 8.47 5.16
 7 11 -4 6.41 2.93
 7 11 -3 52.16 7.76
 7 11 -3 43.35 10.83
 7 11 -2 18.75 7.75
 7 11 -2 16.74 4.63
 7 11 -1 49.76 11.87
 7 11 -1 52.63 7.6
 7 11 0 9.67 3.56
 7 11 0 17.75 7.75
 7 11 0 13.71 4.67
 7 11 1 25.79 5.26
 7 11 1 52.7 13.21
 7 11 1 29.56 7.07
 7 11 2 29.94 9.81
 7 11 2 28.31 7.36
 7 11 3 0.99 5.23
 7 11 3 3.1 4.6
 7 11 4 87.31 17.86
 7 11 4 82.85 13.51
 7 11 5 18.15 8.53
 7 -11 5 10.05 5.6
 7 11 5 0.03 2.38
 7 11 6 4.21 5.91
 7 -11 6 2.72 4.23
 7 11 6 -4.4 4.24
 7 -11 7 23.61 7.59
 7 11 7 18.33 7.08
 7 -11 8 -3.03 2.43
 7 11 8 4.08 5.01
 7 -11 9 16 7.45
 7 13 -6 2.24 3.04
 7 13 -5 8.2 4.86
 7 13 -4 5.47 5.08
 7 13 -3 37.53 10.89
 7 13 -2 12.38 7.28
 7 13 -1 83.52 16.68
 7 13 0 1.67 4.68
 7 13 1 56.22 14.46
 7 13 2 1.38 4.31
 7 13 3 15.06 8.6
 7 13 4 -2.17 5.56
 7 13 4 2.83 2.65
 7 13 5 19.93 9.64
 7 -13 5 7.68 4.17
 7 13 5 9 3.58
 7 -13 6 4.08 4.59
 7 13 6 -0.83 3.49
 7 -13 7 5.19 5.06
 7 13 7 18.32 7.08
 7 -13 8 -0.97 3.6
 7 15 -5 33.91 11.43
 7 15 -4 4.16 3.05
 7 15 -3 23.39 8.9
 7 15 -2 2.69 4.12
 7 15 -1 22.51 8.98
 7 15 0 13.04 6.84
 7 15 1 19.39 8.69
 7 -15 5 11.16 6.1
 8 0 -13 1.86 2.5
 8 0 -12 47.22 9.69
 8 0 -11 4.75 4.17
 8 0 -10 17.64 5.42
 8 0 -9 2.29 2.85
 8 0 -9 1.53 2.07
 8 0 -8 16.92 4.72
 8 0 -8 19.6 5.96
 8 0 -7 -2.74 1.95
 8 0 -7 4.77 3.51
 8 0 -6 93.55 10.82
 8 0 -6 93.14 11.95
 8 0 -5 1.23 1.44
 8 0 -5 -2.4 2.39
 8 0 -5 -0.95 1.98
 8 0 -4 63.25 8.24
 8 0 -4 39.88 7.71
 8 0 -3 2.58 2.05
 8 0 -1 1.62 2.62
 8 0 0 159.2 14.44
 8 0 1 -0.79 2
 8 0 2 82.12 10.87
 8 0 3 4.32 3.72
 8 0 4 7.01 4.75
 8 0 5 -0.39 2.46
 8 0 6 16.73 6.27
 8 0 7 3 4.11
 8 0 8 136.53 18.41
 8 0 9 1.83 5.59
 8 0 10 29.67 10.05
 8 -2 -14 35.96 9.59
 8 -2 -13 25.37 7.39
 8 -2 -13 25.56 7.8
 8 -2 -12 29.01 7.97
 8 2 -12 30.58 7.91
 8 -2 -12 46.54 9.55
 8 -2 -11 7.58 4.31
 8 2 -11 4.9 3.01
 8 -2 -11 6.89 4.6
 8 -2 -10 38.05 8.07
 8 -2 -10 41.54 8.37
 8 2 -10 52.5 9.89
 8 -2 -9 3.38 3.14
 8 2 -9 0.9 2.23
 8 -2 -9 1.9 2.95
 8 -2 -8 35.53 6.88
 8 -2 -8 27.99 7.02
 8 2 -8 29.27 7.13
 8 -2 -7 0.7 1.17
 8 -2 -7 2.11 1.87
 8 2 -7 -0.12 2.03
 8 2 -7 1.77 1.53
 8 2 -7 1.3 1.49
 8 -2 -7 4.89 3.45
 8 2 -6 140.08 11.14
 8 -2 -6 133.45 14.4
 8 2 -6 121.59 13.61
 8 -2 -6 162.2 14.67
 8 2 -6 151.63 13.95
 8 2 -6 140.33 9.85
 8 2 -6 150.97 11.8
 8 -2 -5 3.95 3.46
 8 2 -5 5.11 3.25
 8 2 -5 3.1 2.06
 8 -2 -5 4.69 3.53
 8 2 -5 1.19 2.31
 8 2 -5 1.36 1.24
 8 2 -4 74.81 10.31
 8 2 -4 83.21 9.15
 8 2 -4 83.73 9.73
 8 -2 -4 79.53 9.79
 8 2 -4 82.81 8.1
 8 2 -3 52.74 7.24
 8 2 -3 36.32 5.59
 8 2 -3 36.6 6.4
 8 2 -2 54.78 7.84
 8 2 -2 55.74 6.96
 8 2 -2 44.23 6.32
 8 2 -2 54.2 8.23
 8 2 -1 2.77 1.72
 8 2 -1 1.78 1.45
 8 2 0 53.11 8.27
 8 2 1 -0.64 2.97
 8 -2 1 0.7 2.96
 8 2 2 139.13 14.01
 8 -2 2 145.14 14.63
 8 2 3 27.78 7.03
 8 -2 3 29.37 7.27
 8 -2 4 109.8 13.83
 8 2 4 97.41 13.07
 8 -2 5 0.47 3.04
 8 2 5 4.49 3.56
 8 -2 6 16.13 6.55
 8 2 6 19.78 7.08
 8 2 7 1.58 3.22
 8 -2 7 5.36 4.14
 8 -2 8 29.29 9.37
 8 2 8 35.19 10.02
 8 -2 9 8.09 4.06
 8 2 9 7.88 3.61
 8 -2 10 11.86 6.47
 8 2 10 11.5 7.63
 8 -4 -14 19.68 7.92
 8 -4 -13 10.27 5.23
 8 -4 -13 1.17 3.08
 8 -4 -12 58.42 10.82
 8 -4 -12 60.7 10.36
 8 4 -12 76.75 12.01
 8 -4 -11 -2.54 2.92
 8 4 -11 10.36 5
 8 -4 -11 7.76 4.55
 8 -4 -10 45.35 8.95
 8 -4 -10 70.43 10.94
 8 4 -10 61.89 10.36
 8 -4 -9 4.11 3.04
 8 4 -9 5.75 4.1
 8 -4 -9 6.73 3.42
 8 -4 -8 17.9 5.89
 8 -4 -8 25.4 6.76
 8 4 -8 17.26 5.46
 8 -4 -7 23.83 6.25
 8 -4 -7 29.89 6.79
 8 -4 -7 33.32 7.43
 8 4 -7 41.32 6.18
 8 4 -7 25.74 6.07
 8 4 -6 102.71 10.73
 8 -4 -6 108.01 13.15
 8 4 -6 114.65 13.13
 8 -4 -6 117.48 13.14
 8 4 -5 0.81 1.93
 8 4 -5 2.74 3.2
 8 -4 -5 1.38 2.36
 8 4 -5 -0.5 1.53
 8 -4 -5 3.54 3.69
 8 4 -5 -0.89 0.97
 8 4 -5 1.65 1.63
 8 4 -4 12.66 3.73
 8 4 -4 25.47 5.89
 8 4 -4 22.62 5.6
 8 4 -4 16.44 3.24
 8 4 -4 15.73 4.25
 8 4 -4 16.43 3.68
 8 4 -3 -1.98 1.5
 8 4 -3 -1.97 2.45
 8 4 -3 0.56 2.92
 8 4 -3 1.79 1.9
 8 4 -3 1.35 1.82
 8 4 -3 -0.65 1.11
 8 4 -2 85.03 11.8
 8 4 -2 77.3 9.06
 8 4 -2 73.11 7.52
 8 4 -2 73.8 7.88
 8 4 -2 83.5 9.29
 8 4 -1 2.68 2.36
 8 4 -1 -0.1 1.93
 8 4 -1 3.73 2.35
 8 4 -1 3.07 2.28
 8 4 0 47.2 8.02
 8 4 0 46.75 9.72
 8 4 0 45.27 7.25
 8 4 1 2.23 3.35
 8 4 1 -1.33 2.02
 8 4 2 94.57 14.02
 8 -4 2 83.06 11.7
 8 4 2 87.26 11.29
 8 4 3 10.28 6.27
 8 -4 3 7.66 3.46
 8 4 3 8.01 3.84
 8 4 4 129.29 17.72
 8 4 4 103.43 13.33
 8 -4 4 114.76 14.52
 8 -4 5 7.04 4.45
 8 4 5 -0.34 2.25
 8 4 6 35.86 10.21
 8 -4 6 52.52 10.79
 8 4 6 43.91 10.01
 8 4 7 5.5 7.87
 8 -4 7 1.69 3.95
 8 4 7 13.96 6.75
 8 4 8 45.89 11.88
 8 4 8 56.63 12.2
 8 -4 8 36.53 9.23
 8 4 9 -1.21 3.21
 8 -4 9 4.78 4.77
 8 4 9 5.44 6.07
 8 4 10 14.53 8.44
 8 4 10 3.04 2.73
 8 -4 10 15.4 7.16
 8 -6 -13 -0.65 3.54
 8 -6 -13 8.08 5.12
 8 -6 -12 7.96 5.39
 8 -6 -12 9.17 4.62
 8 -6 -11 2.26 2.43
 8 -6 -11 6.06 4.17
 8 6 -11 2.69 3.4
 8 -6 -10 15.44 5.42
 8 -6 -10 24.48 6.74
 8 6 -10 31.03 7.39
 8 -6 -9 -2.31 2.67
 8 6 -9 -3.89 2.68
 8 -6 -9 2.49 2.87
 8 -6 -8 86.7 11.94
 8 -6 -8 105.8 13.13
 8 6 -8 91.36 12.1
 8 6 -7 4.2 2.16
 8 6 -7 1.07 2.82
 8 6 -7 1.53 2.1
 8 -6 -7 -2.27 2.87
 8 -6 -7 3.99 2.99
 8 6 -6 203.2 16.7
 8 -6 -6 186.22 17.4
 8 6 -6 190.73 16.9
 8 -6 -6 194.2 17.19
 8 6 -6 191.68 11.45
 8 6 -5 0.66 2.51
 8 -6 -5 6.33 4.49
 8 6 -5 1.03 2.41
 8 6 -5 1.17 1.72
 8 6 -4 109.95 12.54
 8 6 -4 145.57 15.48
 8 6 -4 121.87 10.04
 8 6 -3 9.38 5.02
 8 6 -3 3.46 2.83
 8 6 -3 3.59 2.28
 8 6 -3 3.41 1.88
 8 6 -2 124.18 15.62
 8 6 -2 119.3 12.84
 8 6 -2 136.36 9.56
 8 6 -2 159.94 12.69
 8 6 -1 4.51 4.76
 8 6 -1 2.56 1.53
 8 6 -1 2.39 1.77
 8 6 -1 8.77 3.76
 8 6 0 95.12 13.84
 8 6 0 104.78 11.02
 8 6 0 79.54 10.08
 8 6 1 -0.67 3.18
 8 6 1 8.15 3.92
 8 6 2 88.83 14.17
 8 6 2 79.77 10.79
 8 6 3 8.14 4.98
 8 -6 3 5.78 3.93
 8 6 3 5.87 4.63
 8 6 4 29.5 9.19
 8 -6 4 17.05 6.2
 8 6 4 32.64 8.03
 8 6 5 4.78 4.61
 8 -6 5 2.99 3.24
 8 6 5 4.43 3.37
 8 6 6 7.93 6.03
 8 -6 6 1.83 4.15
 8 6 6 12.6 6.89
 8 6 7 2.02 3.74
 8 -6 7 0.04 2.57
 8 6 7 2.37 4.54
 8 6 8 17.06 7.93
 8 -6 8 7.02 4.87
 8 6 8 13.79 7.82
 8 6 9 2.9 3.27
 8 -6 9 -0.69 3.8
 8 6 9 2.56 4.88
 8 -8 -12 34.77 7.91
 8 -8 -12 29.32 8.41
 8 -8 -11 10.29 4.51
 8 -8 -11 9.02 4.64
 8 -8 -10 45.22 8.52
 8 8 -10 44.71 8.85
 8 -8 -10 34.56 8.3
 8 8 -9 4.17 3.8
 8 -8 -9 0.69 2.96
 8 -8 -9 1.23 2.75
 8 8 -8 85.12 11.71
 8 -8 -8 95.3 12.36
 8 -8 -8 117.87 14.55
 8 -8 -7 1.56 1.72
 8 8 -7 3.53 2.28
 8 8 -6 25.66 6.59
 8 8 -6 26.58 6.72
 8 -8 -6 37.84 8.04
 8 8 -5 2.36 2.61
 8 -8 -5 0.92 2.2
 8 8 -5 3.17 2.33
 8 8 -4 31.94 7.1
 8 8 -4 35.59 8.8
 8 8 -4 31.24 5.08
 8 8 -3 25.07 6.17
 8 8 -3 39.03 9.62
 8 8 -3 16.78 4.08
 8 8 -2 15.09 6.59
 8 8 -2 13.6 4.71
 8 8 -2 22.46 3.76
 8 8 -2 24.31 5.44
 8 8 -1 1.66 4.03
 8 8 -1 1.42 2.27
 8 8 -1 -1.17 1.84
 8 8 0 27.13 6.02
 8 8 0 27.08 9.05
 8 8 0 30.17 6.41
 8 8 1 -3.27 3.89
 8 8 1 0.28 2.35
 8 8 2 31.92 9.97
 8 8 2 25.17 6.94
 8 8 3 14.72 6.13
 8 -8 3 5.69 3.96
 8 8 3 3.79 3.56
 8 8 4 8.39 6.11
 8 -8 4 3.89 3.13
 8 8 4 4.11 3.86
 8 8 5 10.9 6.54
 8 -8 5 4.25 4.55
 8 8 5 5.87 4.12
 8 8 6 60.62 14.66
 8 -8 6 45.43 10.17
 8 8 6 58.54 11.99
 8 8 7 5.33 5.15
 8 -8 7 2.96 3.63
 8 8 7 7.8 5.55
 8 8 8 31.47 11.33
 8 -8 8 22 7.57
 8 -8 9 0.99 4.52
 8 8 9 8.78 7.69
 8 -10 -11 3.95 3.52
 8 -10 -10 33.65 7.35
 8 -10 -9 12.85 4.56
 8 -10 -8 50.06 8.88
 8 10 -8 72.58 10.77
 8 -10 -7 20.31 6.27
 8 10 -7 27.01 6.86
 8 -10 -6 49.29 9.02
 8 10 -6 48.66 8.46
 8 10 -6 27.94 7.89
 8 10 -5 5.05 3.87
 8 10 -5 -2.49 3.02
 8 -10 -5 1.59 1.82
 8 10 -4 25.96 9.35
 8 10 -4 27.51 6.52
 8 10 -3 6.69 5.52
 8 10 -3 -1.17 1.72
 8 10 -2 21.92 5.63
 8 10 -2 28.31 8.81
 8 10 -1 2.21 2.32
 8 10 -1 8.04 6.49
 8 10 -1 5.43 3.42
 8 10 0 30.95 10.29
 8 10 0 23.46 5.7
 8 10 0 36.3 7.56
 8 10 1 -2.09 4.09
 8 10 1 -2.16 2.02
 8 10 1 2.64 3.27
 8 10 2 24.46 5.73
 8 10 2 27.95 10.38
 8 10 3 60.33 14.92
 8 10 3 35.31 8.48
 8 10 4 10.73 5.92
 8 -10 4 1.94 3.07
 8 10 4 11.61 5.11
 8 10 5 -4.21 5.64
 8 -10 5 11.09 5.59
 8 10 5 -2.17 3.56
 8 10 6 15.01 9.51
 8 -10 6 6.43 5.38
 8 10 6 15.32 7.12
 8 -10 7 0.24 4.55
 8 10 7 -1.31 4.12
 8 -10 8 19.83 8.08
 8 10 8 20.82 7.61
 8 12 -6 33.46 7.22
 8 -12 -5 2.22 1.81
 8 12 -5 10.2 4.37
 8 12 -5 4.16 5.55
 8 12 -4 84.37 10.52
 8 12 -4 61.22 12.93
 8 12 -3 4.5 5.18
 8 12 -3 -1.09 1.62
 8 12 -2 98.04 17.16
 8 12 -1 6.14 6.56
 8 12 0 50.02 12.6
 8 12 1 1.29 5.13
 8 12 2 40.73 13.64
 8 12 3 14.62 9.4
 8 12 4 63.36 16.58
 8 -12 4 54.82 11.6
 8 12 4 38.95 10.02
 8 -12 5 30.57 9.22
 8 12 5 8.88 4.54
 8 -12 6 3.72 3.85
 8 12 6 16.71 7.56
 8 12 7 5.97 4.91
 8 14 -4 6.33 5.03
 8 14 -3 10.69 6.6
 8 14 -2 4.2 4.96
 8 14 -1 4.51 5.35
 8 14 0 17.4 9.11
 8 14 1 -3.42 5.75
 8 16 -3 2.87 4.3
 9 -1 -14 19.73 7.41
 9 -1 -13 19.61 6.65
 9 1 -13 5.3 3.63
 9 -1 -13 11.53 5.81
 9 -1 -12 12.32 5.41
 9 1 -12 4.85 4.56
 9 -1 -12 7.63 5.38
 9 -1 -11 49.09 9.83
 9 1 -11 51.82 10.16
 9 -1 -11 40.97 9.26
 9 1 -10 1.82 2.88
 9 -1 -10 8.89 5.71
 9 -1 -10 2.98 3.16
 9 1 -10 3.84 3.5
 9 -1 -9 12.15 4.72
 9 1 -9 28.74 7.38
 9 -1 -9 24.65 7.07
 9 1 -9 26.06 6.72
 9 -1 -8 3.54 4.28
 9 1 -8 6.48 4.23
 9 -1 -8 3.01 2.47
 9 1 -8 5.12 3.69
 9 -1 -7 36.17 8.69
 9 1 -7 19.46 6.34
 9 1 -7 23.43 5.01
 9 -1 -7 35.89 7.62
 9 1 -7 30.04 6.94
 9 -1 -6 1.43 2.5
 9 1 -6 5.14 3.44
 9 -1 -6 9.31 4.58
 9 1 -6 2.48 2.94
 9 -1 -5 45.81 8.87
 9 1 -5 44.52 8.83
 9 -1 -5 54.16 8.67
 9 1 -5 77.48 10.1
 9 1 -4 61.08 9.96
 9 1 -4 94.83 10.75
 9 -1 -4 81.71 10.34
 9 1 -3 429.84 21.55
 9 1 -2 233.26 17.63
 9 1 -1 64.75 9.73
 9 1 0 14.83 5.06
 9 -1 0 13.88 4.76
 9 1 1 46.2 8.68
 9 -1 1 43.73 8.36
 9 1 2 7.08 3.95
 9 -1 2 0.38 2.24
 9 1 3 29.09 7.35
 9 -1 3 33.37 8.7
 9 -1 4 2.25 2.88
 9 1 4 10.43 4.45
 9 -1 5 40.54 9.1
 9 1 5 50.91 10.25
 9 -1 6 9.82 5.99
 9 1 6 4.41 4.88
 9 -1 7 4.46 2.8
 9 1 7 8.26 5.9
 9 1 8 44.62 11.12
 9 -1 8 28.32 10.03
 9 -1 9 9.04 5.14
 9 1 9 4.19 5.08
 9 -3 -14 10.89 5.76
 9 -3 -13 53.35 10.97
 9 3 -13 58.62 11.12
 9 -3 -13 55.41 11.11
 9 -3 -12 3.12 3.99
 9 -3 -12 -7.4 5.04
 9 3 -12 6.83 4.58
 9 -3 -11 29 7.16
 9 -3 -11 29.97 7.97
 9 3 -11 35 8.53
 9 -3 -10 2.71 2.56
 9 3 -10 2.2 3.34
 9 -3 -10 1.17 2.49
 9 -3 -9 -0.73 3.13
 9 3 -9 0.82 3.06
 9 -3 -8 4.35 3.33
 9 -3 -8 3.22 4.04
 9 3 -8 1.39 2.54
 9 -3 -7 32.94 7.43
 9 3 -7 33.28 7.33
 9 3 -7 41.87 8.75
 9 -3 -7 46.36 9.5
 9 -3 -6 14.87 5.18
 9 3 -6 17.58 5.25
 9 3 -6 20.56 6.3
 9 -3 -6 18.59 6.39
 9 3 -6 17.34 4.98
 9 -3 -5 52.47 9.01
 9 3 -5 55.86 8.25
 9 -3 -5 52 9.73
 9 3 -5 53.55 8.71
 9 3 -5 58.97 9.78
 9 3 -4 3.32 2.62
 9 3 -4 -0.03 2.1
 9 3 -4 5.86 3.87
 9 3 -4 5.3 3.26
 9 3 -3 80.92 10.09
 9 3 -3 69.44 10.39
 9 3 -3 73.59 11
 9 3 -3 77.86 8.99
 9 3 -3 58.88 8.52
 9 3 -2 5.15 3.18
 9 3 -2 5.19 3.02
 9 3 -1 17.29 5.19
 9 3 0 30.11 6.99
 9 3 1 58.06 9.8
 9 -3 1 59.7 10.28
 9 -3 2 0.71 2.04
 9 3 2 2.68 3.52
 9 -3 3 49.69 9.93
 9 3 3 53.49 9.87
 9 -3 4 -2.32 3.3
 9 3 4 0.36 2.37
 9 -3 5 52.24 10.54
 9 3 5 32.14 8.57
 9 -3 6 -0.81 2.81
 9 3 6 2.83 4.59
 9 -3 7 16.52 6.29
 9 3 7 19.02 7.81
 9 -3 8 8.89 3.78
 9 3 8 10.27 6.95
 9 -5 -14 3.59 3.7
 9 -5 -13 15.99 6.05
 9 -5 -12 2.2 3.68
 9 5 -12 3.27 4.75
 9 -5 -12 -0.02 2.58
 9 -5 -11 22.2 7.31
 9 -5 -11 28.98 7.99
 9 5 -11 22.31 7.31
 9 -5 -10 2.57 3.8
 9 -5 -10 -3.66 3.5
 9 5 -10 1.34 3.56
 9 -5 -9 45.29 9.37
 9 5 -9 51.9 10.24
 9 -5 -9 49.01 9.85
 9 -5 -8 10.09 4.84
 9 -5 -8 8.26 4.33
 9 5 -8 8.92 4.5
 9 5 -7 52.69 7.08
 9 -5 -7 49.27 9.11
 9 5 -7 45.13 9.03
 9 -5 -7 43.12 9.04
 9 5 -6 8.27 3.31
 9 -5 -6 1.14 2.17
 9 5 -6 1.67 3.82
 9 5 -6 3.52 2.88
 9 -5 -6 4.76 3.77
 9 5 -5 52.53 7.44
 9 5 -5 50.22 7.76
 9 5 -5 49.46 9.11
 9 -5 -5 34.92 7.8
 9 5 -5 48.33 8.9
 9 5 -4 -1.46 1.65
 9 5 -4 0.21 1.39
 9 5 -4 0.35 1.83
 9 5 -4 -2.89 2.57
 9 5 -3 3.75 2.37
 9 5 -3 0.48 1.6
 9 5 -3 5.65 3.8
 9 5 -3 4.35 3.96
 9 5 -2 7.54 3.65
 9 5 -2 6.29 4.11
 9 5 -2 1.28 3.01
 9 5 -2 6.34 2.7
 9 5 -1 25.05 7.05
 9 5 -1 34.3 6.92
 9 5 0 4.55 4.69
 9 5 0 1.38 2.59
 9 5 1 33.77 9.28
 9 5 1 25.39 6.78
 9 5 2 6.97 4.99
 9 -5 2 8.37 4.54
 9 5 2 5.15 3.9
 9 5 3 44.56 11.83
 9 -5 3 72.4 12.13
 9 5 3 43.34 9.25
 9 -5 4 3.64 4.69
 9 5 4 3.13 3.28
 9 5 5 45.36 11.69
 9 -5 5 41.96 10.08
 9 5 5 39.46 10.06
 9 5 6 6.84 6.13
 9 -5 6 5.24 4.43
 9 5 6 8.28 5.03
 9 5 7 6.43 6.23
 9 -5 7 2.68 4.71
 9 5 7 7.66 4.49
 9 5 8 8.54 6.52
 9 -5 8 4.63 5.2
 9 5 8 0.8 4.01
 9 -7 -13 25.25 7.46
 9 -7 -12 5.32 4.33
 9 -7 -11 6.53 4.08
 9 7 -11 8 4.66
 9 -7 -11 6.47 5.21
 9 7 -10 0.5 3.04
 9 -7 -10 -2.06 3.43
 9 -7 -10 7.76 5.28
 9 -7 -9 35.1 8.11
 9 7 -9 45.82 9.54
 9 -7 -9 35.97 8.4
 9 -7 -8 2.62 3.74
 9 7 -8 4.67 3.09
 9 -7 -8 -1.25 2.19
 9 -7 -7 39.37 8.8
 9 7 -7 42.57 8.94
 9 7 -6 8.7 5.02
 9 7 -6 -5.31 4.54
 9 -7 -6 -1.96 3.47
 9 7 -5 29.91 7.51
 9 -7 -5 41.94 9.16
 9 7 -5 60.11 10.67
 9 7 -4 0.53 1.67
 9 7 -4 0.25 2.29
 9 7 -4 0.51 1.36
 9 7 -4 1.72 2.14
 9 7 -3 22.07 7.7
 9 7 -3 6.14 3.36
 9 7 -3 13.57 3.65
 9 7 -3 15.51 4.36
 9 7 -2 11.56 5.91
 9 7 -2 8.03 4.03
 9 7 -2 14.23 4.71
 9 7 -1 21.21 6.25
 9 7 -1 34.46 9.75
 9 7 -1 21.63 5.65
 9 7 0 -3.22 3.97
 9 7 0 2.76 3.17
 9 7 1 42.26 10.89
 9 7 1 40.72 8.12
 9 7 2 9.18 5.89
 9 7 2 11.29 4.93
 9 7 3 25.95 9.74
 9 -7 3 29.59 7.84
 9 7 3 28.21 7.65
 9 7 4 -0.85 4.38
 9 -7 4 0.5 3.11
 9 7 4 1.2 2.83
 9 7 5 13.21 7.16
 9 -7 5 20.1 7.34
 9 7 5 3.79 3.27
 9 7 6 8.8 7.49
 9 -7 6 3.59 4.39
 9 7 6 7.27 5.26
 9 7 7 19.05 10.13
 9 -7 7 8.78 6.04
 9 7 7 16.37 7.75
 9 7 8 7.49 6.2
 9 -9 -12 2.47 3.37
 9 -9 -11 24.15 6.67
 9 9 -10 10.77 5.35
 9 -9 -10 -2.05 3.01
 9 9 -9 57.89 10.36
 9 -9 -9 67.53 11.15
 9 9 -8 2.05 2.67
 9 -9 -8 7.53 4.38
 9 9 -7 25.28 6.93
 9 -9 -7 42.87 8.95
 9 9 -6 -1.1 2.75
 9 -9 -6 -0.56 2.52
 9 9 -5 16.35 6.17
 9 -9 -5 27.17 7.73
 9 9 -5 22.38 6.34
 9 9 -4 8.09 4.92
 9 9 -4 2.5 2.46
 9 9 -3 67.56 10.52
 9 9 -3 79.75 14.11
 9 9 -2 2.12 2.6
 9 9 -2 11.63 6.46
 9 9 -1 33.19 9.67
 9 9 -1 22.36 6.25
 9 9 -1 31.8 6.94
 9 9 0 3.24 5.14
 9 9 0 -0.24 2.6
 9 9 0 10.69 4.8
 9 9 1 11.81 4.92
 9 9 1 12.04 5.97
 9 9 1 17.54 5.84
 9 9 2 2.34 3.84
 9 9 2 6.76 4.02
 9 9 3 16.65 7.58
 9 -9 3 22.92 7.65
 9 9 3 26.2 7.38
 9 9 4 3.41 4.02
 9 -9 4 -2.44 3.51
 9 9 4 -1.99 2.95
 9 9 5 24.56 9.94
 9 -9 5 22.43 7.47
 9 9 5 20.89 7.37
 9 -9 6 2.17 4.06
 9 9 6 2.44 3.8
 9 9 7 9.8 5.56
 9 11 -8 21.98 6.62
 9 -11 -7 7.1 3.68
 9 11 -7 19.05 6.02
 9 11 -6 2.03 3.15
 9 -11 -6 0.54 2.81
 9 11 -5 21.77 5.96
 9 -11 -5 23.93 6.8
 9 11 -4 8.92 3.52
 9 11 -4 17.7 7.23
 9 11 -3 19.29 7.92
 9 11 -3 18.38 5.19
 9 11 -2 8.14 4.92
 9 11 -2 4.53 3.17
 9 11 -1 16.35 5.12
 9 11 -1 16.79 7.5
 9 11 0 -2.94 4.61
 9 11 1 33.24 11.59
 9 11 2 8 6.18
 9 11 3 16.92 8.74
 9 -11 3 28.51 8.6
 9 11 3 14.99 6.18
 9 -11 4 -1.29 3.89
 9 11 4 5.58 5.21
 9 11 5 5.47 5.27
 9 11 6 0.44 4.67
 9 13 -3 35.4 11.13
 9 13 -2 3.8 5.67
 9 13 -1 10.31 5.33
 9 13 0 14.06 8.16
 9 13 1 19.02 9.57
 9 15 -2 7.12 6.75
 10 0 -13 0.49 4.84
 10 0 -12 12.59 5.45
 10 0 -12 17.65 7.54
 10 0 -11 9.22 5.39
 10 0 -11 -4.3 4.42
 10 0 -10 23.51 6.97
 10 0 -10 16.77 7
 10 0 -9 14.42 5.75
 10 0 -9 3.07 3.65
 10 0 -8 1.91 3.1
 10 0 -8 8.89 4.97
 10 0 -7 2.71 3.39
 10 0 -7 1.66 3.84
 10 0 -6 35.77 7.35
 10 0 -6 20.18 6.5
 10 0 -5 2.62 3.23
 10 0 -5 -0.74 2.71
 10 0 -4 97.16 11.85
 10 0 -4 90.88 12.82
 10 0 -2 70.69 10.64
 10 0 -1 1.87 2.79
 10 0 0 58.17 9.97
 10 0 1 0.23 3.76
 10 0 2 13.78 5.74
 10 0 3 0.48 2.1
 10 0 4 23.88 8.46
 10 0 5 2.93 4.03
 10 0 6 11.49 6.98
 10 0 7 2.07 4.3
 10 -2 -12 5.77 3.25
 10 2 -12 10.83 5.99
 10 -2 -12 20.16 6.79
 10 -2 -11 1.14 3.14
 10 2 -11 -7.35 4.95
 10 -2 -11 5.1 4.3
 10 2 -11 3.98 3.88
 10 -2 -10 39.87 9.16
 10 2 -10 51.88 10.14
 10 2 -10 49.57 10.26
 10 -2 -10 33.88 8.72
 10 -2 -9 12.28 5.17
 10 2 -9 9.76 4.39
 10 -2 -9 3.46 3.02
 10 2 -9 13.34 5.86
 10 -2 -8 65.01 10.8
 10 2 -8 79.82 11.83
 10 -2 -8 57.55 11.28
 10 2 -8 72.57 11.89
 10 -2 -7 2.34 3.31
 10 2 -7 4.91 3.89
 10 2 -7 7.94 5.03
 10 -2 -7 4.09 3.87
 10 -2 -6 17.53 5.54
 10 2 -6 23.28 5.81
 10 -2 -6 18.38 6.31
 10 2 -6 24.15 5.96
 10 2 -6 14.38 5.48
 10 -2 -5 2.36 3.38
 10 2 -5 3.53 3.85
 10 -2 -5 3 3.8
 10 2 -5 1.93 2.84
 10 2 -5 -2.07 2.37
 10 2 -4 23.63 5.93
 10 2 -4 26.64 6.11
 10 2 -4 11.17 4.83
 10 2 -3 2.14 2.79
 10 2 -2 32.89 7.31
 10 2 -1 5.14 3.27
 10 -2 -1 3.67 3.63
 10 2 0 53.64 9.78
 10 -2 0 36.75 8.35
 10 2 1 0.28 2.47
 10 -2 1 -3.74 3.97
 10 2 2 4.22 4.4
 10 -2 2 1.71 2.46
 10 -2 3 -4.73 3.22
 10 2 3 5.34 4.14
 10 -2 4 26.46 8.5
 10 2 4 26.2 8.05
 10 -2 5 -1.88 3.27
 10 2 5 2.06 3.32
 10 2 6 22.67 8.08
 10 -2 6 23.49 8.92
 10 2 7 7.84 5.74
 10 -2 7 2.76 4.74
 10 -4 -12 25.9 8.39
 10 -4 -12 24.87 7.75
 10 -4 -11 6.25 4.27
 10 4 -11 2.58 2.55
 10 -4 -11 3.99 4.44
 10 -4 -10 62.98 11.5
 10 4 -10 35.87 8.82
 10 -4 -10 47.83 10.2
 10 -4 -9 16.14 5.77
 10 4 -9 6.35 4.32
 10 -4 -9 13.49 6.08
 10 4 -9 15.37 6.05
 10 -4 -8 55.75 10.26
 10 4 -8 43.13 8.38
 10 -4 -8 42.5 9.58
 10 4 -8 58 10.6
 10 4 -7 0.23 1.95
 10 -4 -7 1.4 2.84
 10 4 -7 -0.6 1.86
 10 4 -7 3.31 4.11
 10 -4 -7 -0.32 4.18
 10 4 -6 15.6 4.37
 10 4 -6 22.96 6.35
 10 4 -6 25.31 6.78
 10 -4 -6 16.36 6.05
 10 4 -5 1.55 2.52
 10 4 -5 -0.39 1.84
 10 -4 -5 -3.01 3.35
 10 4 -5 -0.49 2.25
 10 4 -5 -1.24 2.42
 10 4 -4 21.08 6.11
 10 4 -4 25.54 5.88
 10 4 -4 22.86 6.8
 10 4 -4 17.39 5.78
 10 4 -3 8.23 4.09
 10 4 -3 0.44 1.33
 10 4 -3 5.93 3.64
 10 4 -3 1.87 3.53
 10 4 -2 20.82 6.66
 10 4 -2 41.1 7.91
 10 4 -1 4.08 3.32
 10 4 -1 -1.08 3.04
 10 4 0 17.99 7.4
 10 4 0 17.21 6.02
 10 4 1 5.82 5.22
 10 -4 1 18.16 6.25
 10 4 1 20.33 6.29
 10 4 2 7.04 5.82
 10 -4 2 6.21 3.24
 10 4 2 6.2 4.28
 10 4 3 18.81 8.7
 10 -4 3 20.75 6.98
 10 4 3 9.56 5.37
 10 4 4 36.35 11.98
 10 -4 4 5.16 4.48
 10 4 4 22.59 7.38
 10 4 5 4.57 6.32
 10 -4 5 4.46 4.95
 10 4 5 2.36 2.88
 10 4 6 37.73 11.84
 10 -4 6 21.41 8.27
 10 4 6 17.2 7.75
 10 4 7 1.76 3.67
 10 -6 -12 4.29 4.32
 10 -6 -11 6.88 4.78
 10 6 -11 9.11 5.69
 10 -6 -11 -3.44 4
 10 -6 -10 -3.19 4.21
 10 -6 -10 10.27 4.92
 10 6 -10 13.8 5.6
 10 -6 -9 -1.93 2.79
 10 6 -9 2.86 2.8
 10 -6 -9 4.84 4.32
 10 -6 -8 35.03 8.3
 10 -6 -8 20.85 7
 10 6 -8 22.03 6.81
 10 6 -7 -1.56 2.65
 10 6 -7 3.15 3.11
 10 -6 -7 6.05 4.93
 10 6 -6 36.85 7.49
 10 6 -6 39.3 8.83
 10 -6 -6 33.45 8.62
 10 6 -5 2.28 2.34
 10 6 -5 -0.98 2.23
 10 -6 -5 -0.59 2.27
 10 6 -5 -1.04 2.4
 10 6 -4 22.58 6.97
 10 6 -4 24.35 6.8
 10 6 -4 39.82 7.55
 10 6 -3 9.21 4.89
 10 6 -3 3.2 3.34
 10 6 -3 1.36 1.98
 10 6 -2 44.94 8.93
 10 6 -2 57.34 11.5
 10 6 -2 59.5 9.45
 10 6 -1 4.37 3.58
 10 6 -1 6.17 4.63
 10 6 -1 1.28 2.99
 10 6 0 51.06 11.33
 10 6 0 52.54 9.37
 10 -6 1 -3.24 3.02
 10 6 1 0.16 2.48
 10 6 2 61.69 13.52
 10 -6 2 57.84 11.5
 10 6 2 57.96 10.81
 10 6 3 3.95 4.81
 10 -6 3 4.37 4.25
 10 6 3 5.47 5.53
 10 6 4 11.19 6.54
 10 -6 4 11.48 5.64
 10 6 4 23.64 7.78
 10 6 5 7.2 6.99
 10 -6 5 0.21 3.58
 10 6 5 5.15 4.59
 10 6 6 -2.39 5.21
 10 -8 -12 15.97 6.13
 10 -8 -11 4.5 4.87
 10 8 -10 8.67 4.15
 10 -8 -10 8.94 4.04
 10 -8 -9 -1.34 2.49
 10 8 -9 0.79 2.47
 10 -8 -8 6.01 4.22
 10 8 -8 5.6 3.84
 10 8 -7 3.27 3.65
 10 -8 -7 5.62 3.59
 10 -8 -6 21.38 6.81
 10 8 -6 20.02 6.51
 10 8 -5 -1.01 2.36
 10 -8 -5 -7.46 4.79
 10 8 -4 17.5 6.08
 10 8 -4 11.72 6.31
 10 8 -3 2.74 3.73
 10 8 -3 2.73 5.18
 10 8 -2 7.09 5.24
 10 8 -2 10.18 4.32
 10 8 -1 0.58 3.34
 10 8 -1 1.89 2.51
 10 8 0 5.86 4.09
 10 8 0 12.21 6.57
 10 8 0 12.67 5.1
 10 8 1 6.33 5.71
 10 8 1 3.04 3.84
 10 8 2 42.49 12.19
 10 -8 2 40.37 10.3
 10 8 2 38.34 9.3
 10 8 3 4.21 6.54
 10 -8 3 6.97 5.9
 10 8 3 -2.49 3.31
 10 8 4 21.14 9.31
 10 -8 4 26.12 8.57
 10 8 4 22.52 7.51
 10 8 5 4.86 4.21
 10 8 6 16.67 7.07
 10 10 -9 38.52 9.27
 10 -10 -9 24.17 7
 10 -10 -8 6.79 4.99
 10 10 -8 13.68 5.3
 10 10 -7 2.33 3.74
 10 -10 -7 0.32 2.47
 10 10 -6 25.58 7.13
 10 -10 -6 12.64 5.94
 10 -10 -5 -1.89 3.04
 10 10 -5 -0.39 2.49
 10 10 -4 11.25 4.41
 10 10 -3 1.08 2.49
 10 10 -3 12.32 5.59
 10 10 -2 10.09 4.42
 10 10 -2 0.85 3.16
 10 10 -1 6.27 4.03
 10 10 -1 9.61 7.99
 10 10 0 18.49 7.66
 10 10 0 19.05 6.41
 10 10 1 19.47 8.93
 10 10 2 59.07 15.25
 10 10 3 38.93 12.74
 10 10 3 36.34 10.12
 10 10 4 7.6 6.13
 10 10 5 130.49 20.84
 10 12 -8 37.75 8.93
 10 12 -7 4.45 4.43
 10 12 -3 -1.41 3.36
 10 12 -2 28.54 10.17
 10 12 -1 1.43 4.16
 10 12 0 9.83 7.2
 11 1 -12 3.9 4.5
 11 -1 -11 19.31 7.07
 11 1 -11 4.77 4.45
 11 -1 -10 9.21 5.16
 11 1 -10 4.01 3.01
 11 -1 -10 2.43 3.39
 11 1 -10 -4.98 4.21
 11 -1 -9 0.97 2.75
 11 1 -9 3.02 3.85
 11 -1 -9 4.2 3.62
 11 1 -9 10.87 6.06
 11 -1 -8 -0.77 2.06
 11 1 -8 0.23 2.45
 11 -1 -8 7.76 4.41
 11 1 -8 5.54 5.49
 11 -1 -7 21.92 6.81
 11 1 -7 33.96 7.73
 11 1 -7 33.93 8.77
 11 -1 -7 31.58 8.71
 11 -1 -6 7.62 4.88
 11 1 -6 4.15 2.85
 11 -1 -6 -1.4 4.05
 11 1 -6 2.28 3.14
 11 1 -5 10.47 5.04
 11 -1 -5 17.22 6.21
 11 1 -5 15.57 6.01
 11 -1 -4 4.05 3.73
 11 1 -4 1.73 3.64
 11 1 -4 2.82 3.08
 11 1 -3 3.64 2.87
 11 1 -2 6.3 4.44
 11 -1 -2 3.09 2.68
 11 1 -1 25.45 7.12
 11 -1 -1 17.29 6.42
 11 1 0 -3.1 2.73
 11 -1 0 -1.9 3.06
 11 1 1 13.33 5.75
 11 -1 1 15.84 6.18
 11 1 2 4.22 4.44
 11 -1 2 17.85 6.78
 11 1 3 4.47 5.61
 11 -1 3 -3.15 3.34
 11 -1 4 -2.47 2.75
 11 1 4 8.51 6.04
 11 -1 5 11.31 6.61
 11 1 5 -4.56 5.16
 11 3 -12 -3.58 4.56
 11 -3 -11 9.84 5.59
 11 3 -11 14.12 6.27
 11 -3 -10 0.76 2.31
 11 3 -10 4.77 4.21
 11 3 -10 6.39 4.55
 11 -3 -10 1.74 2.65
 11 -3 -9 2.74 3.61
 11 3 -9 6.4 4.81
 11 -3 -9 8.25 4.96
 11 3 -9 13.61 6.42
 11 -3 -8 -0.18 2.44
 11 3 -8 1.94 2.51
 11 -3 -8 1.3 3.74
 11 3 -8 4.29 3.69
 11 3 -7 22.42 6.12
 11 -3 -7 18.52 6.63
 11 3 -7 21.98 6.31
 11 3 -7 19.71 6.77
 11 -3 -7 15.46 6.11
 11 3 -6 5.65 4.39
 11 3 -6 0.23 2.62
 11 3 -6 5.61 4.04
 11 -3 -6 4.35 5.07
 11 3 -5 22.98 6.55
 11 3 -5 16.9 5.07
 11 -3 -5 19.82 6.86
 11 3 -5 8.96 4.89
 11 3 -4 7.45 3.33
 11 3 -4 1.94 3.89
 11 3 -3 27.14 7.76
 11 3 -3 31.93 8.8
 11 3 -3 42.02 8.82
 11 3 -2 0.61 3.29
 11 3 -2 -2.53 3.13
 11 3 -1 21.84 6.62
 11 -3 -1 9.62 4.77
 11 3 0 8.27 4.98
 11 -3 0 7.04 4.66
 11 3 1 42.24 9.79
 11 -3 1 21.82 7.03
 11 -3 2 6.95 4.71
 11 3 2 3.53 4.96
 11 -3 3 32.84 9.38
 11 3 3 41.23 10.45
 11 -3 4 3.53 5.37
 11 3 4 -3.35 4.87
 11 3 5 11.11 6.59
 11 5 -11 2.18 4.78
 11 5 -10 6.1 4.76
 11 -5 -10 -4.91 4.85
 11 -5 -9 21.92 7.12
 11 5 -9 24.49 7.03
 11 -5 -9 24.25 8.05
 11 5 -9 16.72 6.24
 11 5 -8 11.8 4.91
 11 -5 -8 6.62 4.82
 11 5 -8 6.49 4.03
 11 5 -7 37.47 8.02
 11 5 -7 21.28 6.76
 11 -5 -7 38.13 9.91
 11 5 -6 0.55 2.42
 11 5 -6 -1.59 3.27
 11 -5 -6 7.36 4.85
 11 5 -5 10.38 5.13
 11 -5 -5 20.84 7.09
 11 5 -4 2.01 3.49
 11 5 -4 2.03 3.33
 11 5 -4 6.8 3.78
 11 5 -3 15.42 5.9
 11 5 -3 20.84 7.16
 11 5 -3 19.39 6.23
 11 5 -2 5.54 4.23
 11 5 -2 3.64 4.13
 11 5 -2 3.05 3.09
 11 5 -1 -0.63 3.82
 11 5 -1 12.34 5.35
 11 5 0 6.01 5.06
 11 -5 0 7.65 5.81
 11 5 0 5.73 4.39
 11 5 1 13.14 6.26
 11 -5 1 19.49 7.19
 11 5 1 23.25 7.32
 11 5 2 9.59 6.12
 11 -5 2 1.73 4.9
 11 5 2 4.13 5.28
 11 5 3 24.27 8.74
 11 -5 3 13.88 7.33
 11 5 3 11.11 5.85
 11 5 4 8.58 6.95
 11 5 4 4.85 3.85
 11 5 5 6.83 5.37
 11 -7 -10 5.56 3.64
 11 -7 -9 18.76 7.21
 11 -7 -8 3.15 4.71
 11 7 -8 -0.52 2.67
 11 7 -7 22.25 6.4
 11 -7 -7 8.5 6.2
 11 7 -6 -1.15 3.95
 11 -7 -6 8.03 4.57
 11 7 -5 17.02 5.65
 11 -7 -5 12.57 5.67
 11 7 -4 6.14 4.31
 11 7 -3 19.16 7.6
 11 7 -3 16.8 5.77
 11 7 -2 -2.56 2.9
 11 7 -2 6.97 4.78
 11 7 -1 21.08 7.54
 11 7 -1 18.53 7.49
 11 7 -1 11.49 5.09
 11 7 0 -0.88 3.69
 11 7 0 5.76 6.52
 11 7 0 3.66 3.5
 11 7 1 7.14 4.96
 11 -7 1 19.01 7.9
 11 7 1 22.85 7.99
 11 7 2 11.99 7.45
 11 7 2 -3.89 3.31
 11 7 3 9.47 7.1
 11 7 3 7.72 5.65
 11 7 4 -3.27 3.56
 11 7 5 7.01 5.6
 11 -9 -9 42.93 10.72
 11 -9 -8 10.69 6.52
 11 9 -7 22.58 7.03
 11 -9 -7 9.67 5.59
 11 -9 -6 2.88 3.55
 11 9 -6 -4.06 3.16
 11 -9 -5 10.14 5.86
 11 9 -5 13.19 5.68
 11 9 -4 -1.27 2.19
 11 9 -3 3.82 4.17
 11 9 -3 7.17 5.69
 11 9 -2 3.13 4.24
 11 9 -2 3.11 3.49
 11 9 -1 13.64 8.46
 11 9 -1 13.5 5.49
 11 9 0 -1.1 3.39
 11 9 0 -0.32 2.86
 11 9 1 13.51 6.94
 11 9 1 14.26 8.03
 11 9 4 0.71 4.67
 11 11 -6 3.95 4.04
 11 -11 -6 -0.56 3.53
 11 11 -5 12.11 5.51
 11 -11 -5 5.22 4.77
 11 11 -2 1.61 3.83
 11 11 -1 3.16 5.13
 11 11 0 6.3 5.9
 12 0 -10 9.77 5.6
 12 0 -9 5.89 5.08
 12 0 -8 15.13 5.95
 12 0 -7 -3.69 5.13
 12 0 -7 1.77 3.49
 12 0 -6 16.86 6.71
 12 0 -6 30.09 7.49
 12 0 -5 7.57 5.01
 12 0 -4 129.82 16.97
 12 0 -4 164.82 17.85
 12 0 -3 5.63 3.69
 12 0 -2 59.18 11.16
 12 0 -1 7.88 4.74
 12 0 0 18.78 7.34
 12 0 1 -1.43 3.51
 12 0 2 2.82 3.35
 12 2 -11 1.2 3.06
 12 2 -10 13.62 5.75
 12 -2 -9 9.23 6.31
 12 2 -9 3.59 2.76
 12 -2 -8 13.97 5.59
 12 2 -8 19.34 6.62
 12 2 -7 -4.29 3.01
 12 2 -7 4.6 4.62
 12 -2 -7 8.15 5.33
 12 2 -6 13.52 5.09
 12 2 -6 4.25 3.55
 12 -2 -6 5.76 4.66
 12 2 -6 8.28 4.63
 12 -2 -5 6.61 4.81
 12 2 -5 10.48 5.41
 12 2 -5 13.31 5.51
 12 -2 -4 10.83 5.61
 12 2 -4 7.2 5.1
 12 2 -4 -1.01 2.39
 12 2 -3 33.04 9.61
 12 2 -3 23.38 6.77
 12 -2 -3 27.21 7.79
 12 2 -2 -6.45 4.41
 12 -2 -2 6.25 4.91
 12 2 -1 -2.18 3.3
 12 -2 -1 2.55 4
 12 2 0 15.54 5.96
 12 -2 0 15.75 6.34
 12 2 1 -2.58 2.73
 12 -2 1 8.05 5.22
 12 -2 2 1.6 3.83
 12 2 2 12.37 5.54
 12 2 3 0.04 2.94
 12 4 -11 5.99 5.19
 12 4 -10 10.23 5.37
 12 4 -9 4.48 3.78
 12 4 -8 13.41 5.31
 12 4 -7 1.38 2.76
 12 -4 -7 1.93 3.67
 12 4 -6 13.95 6.26
 12 -4 -6 2.57 2.78
 12 -4 -5 -0.54 2.31
 12 4 -5 13.83 6.5
 12 4 -4 15.35 5.95
 12 4 -4 24.9 7.19
 12 4 -3 8.2 4.83
 12 4 -3 3.52 3.06
 12 4 -3 2.2 3.74
 12 4 -2 19.67 7.47
 12 4 -2 11.93 7.12
 12 4 -2 11.81 5.38
 12 4 -1 13.54 7.66
 12 4 -1 4.2 4.52
 12 -4 -1 5.28 4.32
 12 4 0 29.5 9.57
 12 -4 0 21.86 8.07
 12 4 0 14 6.38
 12 4 1 -2.97 5
 12 4 1 6.73 4.37
 12 4 2 13.41 6.49
 12 4 2 17.86 7.73
 12 4 3 -3.63 2.79
 12 6 -6 30.3 8.8
 12 6 -5 1.04 2.97
 12 -6 -5 -0.17 3.65
 12 6 -4 15.84 6.04
 12 6 -3 -1.05 3.37
 12 6 -2 5.41 4.87
 12 6 -2 6.83 5.02
 12 6 -1 4.86 4.51
 12 6 -1 1.16 3.5
 12 6 0 17.26 7.97
 12 6 0 17.5 7.06
 12 6 1 4.47 4.91
 12 6 1 3.69 3.88
 12 6 2 -3.11 3.62
 12 6 3 0.63 3.33
 12 8 -4 7.39 4.81
 12 8 -3 15.59 6.74
 12 8 -2 2.65 3.77
 12 8 -1 3.43 4.97
 12 8 -1 4.79 5.4
 12 8 0 19.25 9.54
 12 8 0 18.1 8.46
 12 8 1 -6.6 8.13
 13 1 -9 11.59 5.95
 13 -1 -8 8.18 5.56
 13 1 -8 4.95 4.15
 13 1 -7 5.42 4.32
 13 1 -6 6.37 3.99
 13 1 -5 7.83 5.35
 13 -1 -5 16.66 6.01
 13 1 -4 12.65 6.52
 13 -1 -4 0.41 3.48
 13 1 -3 7.8 4.76
 13 -1 -3 16.03 6.7
 13 1 -2 -3.59 2.82
 13 -1 -2 3.05 3.21
 13 1 -1 23.62 7.65
 13 1 0 3.53 3.32
 13 3 -3 13.29 6.54
 13 3 -2 9.06 5.65
 13 3 -1 13.59 8.49
 13 3 -1 3.68 2.76
 13 3 0 -0.8 4.51
 13 3 0 -3.14 5.18
 13 5 -1 17.59 10.32
 13 5 0 6.9 5.36
 13 5 0 -4.84 3.67
 13 5 1 14.07 6.49

_iucr_refine_instructions_details
;

    miao20201014-4.res created by SHELXL-2014/7

TITL miao20201014-4_a.res in C2/c
REM Old TITL MIAO20201014-4 in Cc
REM SHELXT solution in C2/c
REM R1 0.137, Rweak 0.013, Alpha 0.044, Orientation as input
REM Formula found by SHELXT: C22 N4 O6 Br
CELL 0.71073 10.4027 14.8477 13.9101 90 101.425 90
ZERR 4 0.0007 0.0007 0.0008 0 0.006 0
LATT 7
SYMM -X,+Y,0.5-Z
SFAC C H N O Se
UNIT 88 64 8 32 4
EQIV $1 1.5-X,0.5-Y,2-Z
 
L.S. 4 0 0
PLAN  20
HTAB O1 O2_$1
HTAB O3 N1
BOND $H
list 4
fmap 2 53
ACTA
REM <olex2.extras>
REM <HklSrc "%.\\MIAO20201014-4.hkl">
REM </olex2.extras>
 
WGHT    0.023100    3.314600
FVAR       0.21950
SE1   5    0.500000    0.249567    0.250000    10.50000    0.05442    0.03011 =
         0.03867    0.00000    0.01117    0.00000
N1    3    0.526215    0.332683    0.344819    11.00000    0.04538    0.04071 =
         0.02659    0.00061    0.00827   -0.00115
C9    1    0.514018    0.413128    0.302384    11.00000    0.03592    0.03547 =
         0.03554   -0.00020    0.00914   -0.00088
C10   1    0.528037    0.496760    0.354327    11.00000    0.04825    0.04933 =
         0.05064   -0.01690    0.00921   -0.00316
AFIX  43
H10   2    0.546816    0.498108    0.422518    11.00000   -1.20000
AFIX   0
C11   1    0.513266    0.573661    0.301668    11.00000    0.04704    0.03456 =
         0.09424   -0.01429    0.01104   -0.00233
AFIX  43
H11   2    0.520843    0.628482    0.334650    11.00000   -1.20000
AFIX   0
 
O1    4    0.734560    0.132382    0.961578    11.00000    0.09209    0.05102 =
         0.02792    0.00736    0.00390   -0.00022
AFIX 147
H1    2    0.743397    0.165756    1.009407    11.00000   -1.50000
AFIX   0
O2    4    0.720811    0.263034    0.881342    11.00000    0.08673    0.03817 =
         0.03274   -0.00020    0.00502    0.01015
O3    4    0.587094    0.265524    0.529367    11.00000    0.10950    0.04503 =
         0.03104    0.00214    0.00652    0.01296
AFIX 147
H3    2    0.570752    0.289750    0.475343    11.00000   -1.50000
AFIX   0
O4    4    0.578975    0.141166    0.439300    11.00000    0.10165    0.05210 =
         0.02878   -0.00677    0.00506   -0.01141
C1    1    0.684286    0.127919    0.789907    11.00000    0.03295    0.03898 =
         0.03030    0.00124    0.00505    0.00359
C2    1    0.656103    0.174734    0.701600    11.00000    0.03933    0.03590 =
         0.03355    0.00034    0.00814    0.00297
AFIX  43
H2    2    0.655500    0.237368    0.701905    11.00000   -1.20000
AFIX   0
C3    1    0.628885    0.128720    0.613072    11.00000    0.03348    0.04118 =
         0.03078   -0.00214    0.00488   -0.00258
C4    1    0.631246    0.035696    0.613439    11.00000    0.04498    0.04456 =
         0.03826   -0.00689    0.00361   -0.00829
AFIX  43
H4    2    0.615306    0.004415    0.554345    11.00000   -1.20000
AFIX   0
C5    1    0.657220   -0.011435    0.701304    11.00000    0.04878    0.03811 =
         0.04997    0.00015    0.00597   -0.00725
AFIX  43
H5    2    0.657329   -0.074070    0.700847    11.00000   -1.20000
AFIX   0
C6    1    0.682873    0.034334    0.789299    11.00000    0.04093    0.04329 =
         0.04006    0.00859    0.00748    0.00093
AFIX  43
H6    2    0.699196    0.002628    0.848121    11.00000   -1.20000
AFIX   0
C7    1    0.714122    0.180507    0.881769    11.00000    0.03771    0.04546 =
         0.02826    0.00360    0.00483    0.00540
C8    1    0.596431    0.177394    0.518251    11.00000    0.04410    0.04840 =
         0.03161   -0.00202    0.00381   -0.00412
HKLF 4
 
REM  miao20201014-4_a.res in C2/c
REM R1 =  0.0548 for    1766 Fo > 4sig(Fo)  and  0.0850 for all    2387 data
REM    152 parameters refined using      0 restraints
 
END  
     
WGHT      0.0231      3.3146 

REM Highest difference peak  0.342,  deepest hole -0.281,  1-sigma level  0.065
Q1    1   0.6870  0.0810  0.9162  11.00000  0.05    0.34
Q2    1   0.4997  0.2990  0.3023  11.00000  0.05    0.29
Q3    1   0.6060  0.1513  0.6604  11.00000  0.05    0.27
Q4    1   0.6631  0.1599  0.7534  11.00000  0.05    0.26
Q5    1   0.8364 -0.0952  0.9129  11.00000  0.05    0.26
Q6    1   0.5000  0.1805  0.2500  10.50000  0.05    0.25
Q7    1   0.6651  0.2750  0.7052  11.00000  0.05    0.25
Q8    1   0.6243  0.1468  0.7418  11.00000  0.05    0.24
Q9    1   0.6645  0.3163  0.8580  11.00000  0.05    0.24
Q10   1   0.5889  0.2468  0.2039  11.00000  0.05    0.23
Q11   1   0.7014  0.0785  0.7678  11.00000  0.05    0.23
Q12   1   0.4965  0.2004  0.2989  11.00000  0.05    0.23
Q13   1   0.6189  0.1607  0.5782  11.00000  0.05    0.22
Q14   1   0.5803  0.0827  0.6353  11.00000  0.05    0.22
Q15   1   0.6810  0.0792  0.6370  11.00000  0.05    0.22
Q16   1   0.5891  0.0193  0.6570  11.00000  0.05    0.21
Q17   1   0.4035  0.2257  0.2254  11.00000  0.05    0.21
Q18   1   0.6200  0.0159  0.7410  11.00000  0.05    0.21
Q19   1   0.5048  0.0410  0.6791  11.00000  0.05    0.20
Q20   1   0.8378  0.2469  0.9230  11.00000  0.05    0.20

  REM The information below was added by Olex2.
  REM
  REM R1 = 0.0548 for 1766 Fo > 4sig(Fo) and 0.0850 for all 12470 data
  REM n/a parameters refined using n/a restraints
  REM Highest difference peak 0.34, deepest hole -0.28
  REM Mean Shift 0, Max Shift 0.000.

  REM +++ Tabular Listing of Refinement Information +++
  REM R1_all = 0.0850
  REM R1_gt = 0.0548
  REM wR_ref = 0.0988
  REM GOOF = 1.131
  REM Shift_max = 0.000
  REM Shift_mean = 0
  REM Reflections_all = 12470
  REM Reflections_gt = 1766
  REM Parameters = n/a
  REM Hole = -0.28
  REM Peak = 0.34
  REM Flack = n/a

  
;
_olex2_submission_special_instructions  'No special instructions were received'
_oxdiff_exptl_absorpt_empirical_details
;
Empirical correction (ABSPACK) includes:
- Absorption correction using spherical harmonics
- Frame scaling
;
_oxdiff_exptl_absorpt_empirical_full_max  1.587
_oxdiff_exptl_absorpt_empirical_full_min  0.653

data_2090234
_audit_creation_date               2020-09-25
_audit_creation_method
;
Olex2 1.2
(compiled 2018.05.29 svn.r3508 for OlexSys, GUI svn.r5506)
;
_shelx_SHELXL_version_number       '2014/7'
_audit_contact_author_address      'Luoyang Normal University'
_audit_contact_author_email        'wzw@lynu.edu.cn'
_audit_contact_author_name         'Weizhou Wang'
_audit_contact_author_phone        '+86-13633799150'
_publ_contact_author_id_orcid      '0000-0002-4309-9077'
_publ_section_references
;
Dolomanov, O.V., Bourhis, L.J., Gildea, R.J, Howard, J.A.K. & Puschmann, H.
 (2009), J. Appl. Cryst. 42, 339-341.

Sheldrick, G.M. (2015). Acta Cryst. A71, 3-8.

Sheldrick, G.M. (2015). Acta Cryst. C71, 3-8.
;
_chemical_name_common              ?
_chemical_name_systematic          ?
_chemical_formula_moiety           'C6 H4 N2 Se, C8 H6 O4'
_chemical_formula_sum              'C14 H10 N2 O4 Se'
_chemical_formula_weight           349.20
_chemical_melting_point            ?
_chemical_oxdiff_formula           'C H O'
loop_
  _atom_type_symbol
  _atom_type_description
  _atom_type_scat_dispersion_real
  _atom_type_scat_dispersion_imag
  _atom_type_scat_source
 'C' 'C' 0.0033 0.0016 'International Tables Vol C Tables 4.2.6.8 and 6.1.1.4'
 'H' 'H' 0.0000 0.0000 'International Tables Vol C Tables 4.2.6.8 and 6.1.1.4'
 'N' 'N' 0.0061 0.0033 'International Tables Vol C Tables 4.2.6.8 and 6.1.1.4'
 'O' 'O' 0.0106 0.0060 'International Tables Vol C Tables 4.2.6.8 and 6.1.1.4'
 'Se' 'Se' -0.0929 2.2259
 'International Tables Vol C Tables 4.2.6.8 and 6.1.1.4'

_shelx_space_group_comment
;
The symmetry employed for this shelxl refinement is uniquely defined
by the following loop, which should always be used as a source of
symmetry information in preference to the above space-group names.
They are only intended as comments.
;
_space_group_crystal_system        'monoclinic'
_space_group_IT_number             11
_space_group_name_H-M_alt          'P 1 21/m 1'
_space_group_name_Hall             '-P 2yb'
loop_
  _space_group_symop_operation_xyz
 'x, y, z'
 '-x, y+1/2, -z'
 '-x, -y, -z'
 'x, -y-1/2, z'

_cell_length_a                     6.9731(4)
_cell_length_b                     12.4491(5)
_cell_length_c                     8.2841(3)
_cell_angle_alpha                  90
_cell_angle_beta                   107.827(5)
_cell_angle_gamma                  90
_cell_volume                       684.60(6)
_cell_formula_units_Z              2
_cell_measurement_reflns_used      3781
_cell_measurement_temperature      292
_cell_measurement_theta_max        24.1090
_cell_measurement_theta_min        4.2110
_shelx_estimated_absorpt_T_max     ?
_shelx_estimated_absorpt_T_min     ?
_exptl_absorpt_coefficient_mu      2.760
_exptl_absorpt_correction_T_max    1.00000
_exptl_absorpt_correction_T_min    0.64171
_exptl_absorpt_correction_type     multi-scan
_exptl_absorpt_process_details
;
CrysAlisPro 1.171.40.53 (Rigaku Oxford Diffraction, 2019)
Empirical absorption correction using spherical harmonics,
 implemented in SCALE3 ABSPACK scaling algorithm.
;
_exptl_absorpt_special_details     ?
_exptl_crystal_colour              colourless
_exptl_crystal_colour_primary      colourless
_exptl_crystal_density_diffrn      1.694
_exptl_crystal_density_meas        ?
_exptl_crystal_density_method      ?
_exptl_crystal_description         needle
_exptl_crystal_F_000               348
_exptl_crystal_size_max            0.27
_exptl_crystal_size_mid            0.15
_exptl_crystal_size_min            0.14
_exptl_transmission_factor_max     ?
_exptl_transmission_factor_min     ?
_diffrn_reflns_av_R_equivalents    0.0317
_diffrn_reflns_av_unetI/netI       0.0258
_diffrn_reflns_Laue_measured_fraction_full  0.998
_diffrn_reflns_Laue_measured_fraction_max  0.911
_diffrn_reflns_limit_h_max         9
_diffrn_reflns_limit_h_min         -9
_diffrn_reflns_limit_k_max         16
_diffrn_reflns_limit_k_min         -15
_diffrn_reflns_limit_l_max         11
_diffrn_reflns_limit_l_min         -11
_diffrn_reflns_number              9375
_diffrn_reflns_point_group_measured_fraction_full  0.998
_diffrn_reflns_point_group_measured_fraction_max  0.911
_diffrn_reflns_theta_full          25.242
_diffrn_reflns_theta_max           28.349
_diffrn_reflns_theta_min           3.273
_diffrn_ambient_temperature        292
_diffrn_detector                   'CCD plate'
_diffrn_detector_area_resol_mean   8.0584
_diffrn_detector_type              EosS2
_diffrn_measured_fraction_theta_full  0.998
_diffrn_measured_fraction_theta_max  0.911
_diffrn_measurement_details
;
List of Runs (angles in degrees, time in seconds):

  # Type    Start    End  Width  t~exp~   \w     \q     \k     \f   Frames
--------------------------------------------------------------------------
  1  \w     -1.00  48.00   1.00   10.00    --  -13.49  77.00 -90.00   49
  2  \w    -83.00   5.00   1.00   10.00    --  -13.49 -38.00-150.00   88
  3  \w    -78.00   2.00   1.00   10.00    --  -13.49 -57.00 120.00   80
  4  \w     13.00  51.00   1.00   10.00    --  -13.49  57.00  30.00   38
  5  \w    -15.00  23.00   1.00   10.00    --  -13.49 -99.00 -90.00   38
  6  \w    -20.00   8.00   1.00   10.00    --  -13.49 -99.00  60.00   28
  7  \w     24.00  66.00   1.00   10.00    --   14.89-121.00 141.00   42
  8  \w     -5.00  54.00   1.00   10.00    --   14.89 -99.00   0.00   59
  9  \w    -54.00  10.00   1.00   10.00    --   14.89 -38.00 120.00   64
 10  \w     -1.00  54.00   1.00   10.00    --   14.89 -99.00-120.00   55
 11  \w     -8.00  82.00   1.00   10.00    --   14.89  19.00  90.00   90
;
_diffrn_measurement_device         'four-circle diffractometer'
_diffrn_measurement_device_type   
 'SuperNova, Single source at offset/far, EosS2'
_diffrn_measurement_method         '\w scans'
_diffrn_orient_matrix_type        
 'CrysAlisPro convention (1999,Acta A55,543-557)'
_diffrn_orient_matrix_UB_11        -0.0109198000
_diffrn_orient_matrix_UB_12        0.0563147000
_diffrn_orient_matrix_UB_13        -0.0121526000
_diffrn_orient_matrix_UB_21        -0.0468640000
_diffrn_orient_matrix_UB_22        0.0030544000
_diffrn_orient_matrix_UB_23        0.0647809000
_diffrn_orient_matrix_UB_31        0.0954133000
_diffrn_orient_matrix_UB_32        0.0079409000
_diffrn_orient_matrix_UB_33        0.0612098000
_diffrn_radiation_monochromator    mirror
_diffrn_radiation_probe            x-ray
_diffrn_radiation_type             MoK\a
_diffrn_radiation_wavelength       0.71073
_diffrn_source                     'micro-focus sealed X-ray tube'
_diffrn_source_type                'SuperNova (Mo) X-ray Source'
_reflns_Friedel_coverage           0.000
_reflns_Friedel_fraction_full      .
_reflns_Friedel_fraction_max       .
_reflns_number_gt                  1404
_reflns_number_total               1627
_reflns_odcompleteness_completeness  99.70
_reflns_odcompleteness_iscentric   1
_reflns_odcompleteness_theta       25.30
_reflns_special_details
;
 Reflections were merged by SHELXL according to the crystal
 class for the calculation of statistics and refinement.
 
 _reflns_Friedel_fraction is defined as the number of unique
 Friedel pairs measured divided by the number that would be
 possible theoretically, ignoring centric projections and
 systematic absences.
;
_reflns_threshold_expression       'I > 2\s(I)'
_computing_cell_refinement         'CrysAlisPro 1.171.40.53 (Rigaku OD, 2019)'
_computing_data_collection         'CrysAlisPro 1.171.40.53 (Rigaku OD, 2019)'
_computing_data_reduction          'CrysAlisPro 1.171.40.53 (Rigaku OD, 2019)'
_computing_molecular_graphics      'Olex2 (Dolomanov et al., 2009)'
_computing_publication_material    'Olex2 (Dolomanov et al., 2009)'
_computing_structure_refinement    'ShelXL (Sheldrick, 2015)'
_computing_structure_solution      'ShelXT (Sheldrick, 2015)'
_refine_diff_density_max           0.266
_refine_diff_density_min           -0.359
_refine_diff_density_rms           0.053
_refine_ls_extinction_coef         .
_refine_ls_extinction_method       none
_refine_ls_goodness_of_fit_ref     1.120
_refine_ls_hydrogen_treatment      constr
_refine_ls_matrix_type             full
_refine_ls_number_parameters       101
_refine_ls_number_reflns           1627
_refine_ls_number_restraints       0
_refine_ls_R_factor_all            0.0406
_refine_ls_R_factor_gt             0.0318
_refine_ls_restrained_S_all        1.120
_refine_ls_shift/su_max            0.001
_refine_ls_shift/su_mean           0.000
_refine_ls_structure_factor_coef   Fsqd
_refine_ls_weighting_details      
 'w=1/[\s^2^(Fo^2^)+(0.0289P)^2^+0.2215P] where P=(Fo^2^+2Fc^2^)/3'
_refine_ls_weighting_scheme        calc
_refine_ls_wR_factor_gt            0.0696
_refine_ls_wR_factor_ref           0.0726
_refine_special_details            ?
_olex2_refinement_description
;
1. Fixed Uiso
 At 1.2 times of:
  All C(H) groups
 At 1.5 times of:
  All O(H) groups
2.a Aromatic/amide H refined with riding coordinates:
 C2(H2A), C3(H3), C4(H4), C6(H6), C7(H7)
2.b Idealised tetrahedral OH refined as rotating group:
 O2(H2)
;
_atom_sites_solution_hydrogens     geom
_atom_sites_solution_primary       dual
_atom_sites_solution_secondary     ?
loop_
  _atom_site_label
  _atom_site_type_symbol
  _atom_site_fract_x
  _atom_site_fract_y
  _atom_site_fract_z
  _atom_site_U_iso_or_equiv
  _atom_site_adp_type
  _atom_site_occupancy
  _atom_site_site_symmetry_order
  _atom_site_calc_flag
  _atom_site_refinement_flags_posn
  _atom_site_refinement_flags_adp
  _atom_site_refinement_flags_occupancy
  _atom_site_disorder_assembly
  _atom_site_disorder_group
 Se1 Se 0.77483(5) 0.7500 0.50974(4) 0.04630(14) Uani 1 2 d S T P . .
 N1 N 0.7247(3) 0.64629(15) 0.3541(2) 0.0437(5) Uani 1 1 d . . . . .
 C1 C 0.6757(3) 0.69234(18) 0.2024(2) 0.0377(5) Uani 1 1 d . . . . .
 C2 C 0.6265(4) 0.6362(2) 0.0451(3) 0.0531(6) Uani 1 1 d . . . . .
 H2A H 0.6295 0.5615 0.0425 0.064 Uiso 1 1 calc R . . . .
 C3 C 0.5757(4) 0.6934(2) -0.0996(3) 0.0624(7) Uani 1 1 d . . . . .
 H3 H 0.5395 0.6572 -0.2027 0.075 Uiso 1 1 calc R . . . .
 O1 O 0.8337(3) 0.53655(14) 0.7128(2) 0.0710(6) Uani 1 1 d . . . . .
 O2 O 0.7372(3) 0.44131(15) 0.47524(19) 0.0628(5) Uani 1 1 d . . . . .
 H2 H 0.7293 0.5011 0.4320 0.094 Uiso 1 1 calc GR . . . .
 C4 C 0.7869(4) 0.2500 0.6448(4) 0.0361(7) Uani 1 2 d S T P . .
 H4 H 0.7513 0.2500 0.5270 0.043 Uiso 1 2 calc RS T P . .
 C5 C 0.8130(3) 0.34677(18) 0.7316(3) 0.0384(5) Uani 1 1 d . . . . .
 C6 C 0.8649(3) 0.3458(2) 0.9081(3) 0.0487(6) Uani 1 1 d . . . . .
 H6 H 0.8839 0.4103 0.9676 0.058 Uiso 1 1 calc R . . . .
 C7 C 0.8883(5) 0.2500 0.9945(4) 0.0520(9) Uani 1 2 d S T P . .
 H7 H 0.9200 0.2500 1.1120 0.062 Uiso 1 2 calc RS T P . .
 C8 C 0.7966(4) 0.45082(19) 0.6426(3) 0.0461(6) Uani 1 1 d . . . . .

loop_
  _atom_site_aniso_label
  _atom_site_aniso_U_11
  _atom_site_aniso_U_22
  _atom_site_aniso_U_33
  _atom_site_aniso_U_23
  _atom_site_aniso_U_13
  _atom_site_aniso_U_12
 Se1 0.0551(2) 0.0497(2) 0.03043(18) 0.000 0.00774(14) 0.000
 N1 0.0505(11) 0.0365(10) 0.0420(10) 0.0021(8) 0.0110(9) -0.0005(8)
 C1 0.0337(11) 0.0418(12) 0.0358(11) -0.0016(9) 0.0078(9) -0.0014(9)
 C2 0.0505(14) 0.0573(15) 0.0519(14) -0.0181(12) 0.0163(12) -0.0058(12)
 C3 0.0495(14) 0.100(2) 0.0364(12) -0.0137(13) 0.0112(11) -0.0035(13)
 O1 0.1102(16) 0.0396(10) 0.0570(11) -0.0125(9) 0.0166(11) -0.0022(10)
 O2 0.0997(15) 0.0372(9) 0.0421(10) 0.0012(7) 0.0080(10) -0.0030(9)
 C4 0.0347(15) 0.0407(17) 0.0309(15) 0.000 0.0068(12) 0.000
 C5 0.0343(11) 0.0444(13) 0.0348(11) -0.0042(9) 0.0081(9) -0.0004(9)
 C6 0.0452(13) 0.0602(16) 0.0382(12) -0.0128(11) 0.0091(10) -0.0024(11)
 C7 0.048(2) 0.077(3) 0.0290(15) 0.000 0.0090(14) 0.000
 C8 0.0506(14) 0.0422(14) 0.0438(13) -0.0061(11) 0.0116(11) 0.0007(10)

_geom_special_details
;
 All esds (except the esd in the dihedral angle between two l.s. planes)
 are estimated using the full covariance matrix.  The cell esds are taken
 into account individually in the estimation of esds in distances, angles
 and torsion angles; correlations between esds in cell parameters are only
 used when they are defined by crystal symmetry.  An approximate (isotropic)
 treatment of cell esds is used for estimating esds involving l.s. planes.
;
loop_
  _geom_bond_atom_site_label_1
  _geom_bond_atom_site_label_2
  _geom_bond_distance
  _geom_bond_site_symmetry_2
  _geom_bond_publ_flag
 Se1 N1 1.7819(18) . ?
 Se1 N1 1.7820(18) 4_575 ?
 N1 C1 1.328(3) . ?
 C1 C1 1.436(4) 4_575 ?
 C1 C2 1.425(3) . ?
 C2 H2A 0.9300 . ?
 C2 C3 1.345(3) . ?
 C3 C3 1.408(6) 4_575 ?
 C3 H3 0.9300 . ?
 O1 C8 1.205(3) . ?
 O2 H2 0.8200 . ?
 O2 C8 1.325(2) . ?
 C4 H4 0.9300 . ?
 C4 C5 1.386(3) . ?
 C4 C5 1.386(3) 4_565 ?
 C5 C6 1.394(3) . ?
 C5 C8 1.477(3) . ?
 C6 H6 0.9300 . ?
 C6 C7 1.375(3) . ?
 C7 C6 1.375(3) 4_565 ?
 C7 H7 0.9300 . ?

loop_
  _geom_angle_atom_site_label_1
  _geom_angle_atom_site_label_2
  _geom_angle_atom_site_label_3
  _geom_angle
  _geom_angle_site_symmetry_1
  _geom_angle_site_symmetry_3
  _geom_angle_publ_flag
 N1 Se1 N1 92.86(12) . 4_575 ?
 C1 N1 Se1 107.99(15) . . ?
 N1 C1 C1 115.59(12) . 4_575 ?
 N1 C1 C2 125.0(2) . . ?
 C2 C1 C1 119.38(14) . 4_575 ?
 C1 C2 H2A 120.7 . . ?
 C3 C2 C1 118.6(2) . . ?
 C3 C2 H2A 120.7 . . ?
 C2 C3 C3 121.99(16) . 4_575 ?
 C2 C3 H3 119.0 . . ?
 C3 C3 H3 119.0 4_575 . ?
 C8 O2 H2 109.5 . . ?
 C5 C4 H4 119.6 4_565 . ?
 C5 C4 H4 119.6 . . ?
 C5 C4 C5 120.7(3) . 4_565 ?
 C4 C5 C6 119.1(2) . . ?
 C4 C5 C8 121.7(2) . . ?
 C6 C5 C8 119.1(2) . . ?
 C5 C6 H6 119.8 . . ?
 C7 C6 C5 120.3(2) . . ?
 C7 C6 H6 119.8 . . ?
 C6 C7 C6 120.3(3) 4_565 . ?
 C6 C7 H7 119.8 . . ?
 C6 C7 H7 119.8 4_565 . ?
 O1 C8 O2 122.4(2) . . ?
 O1 C8 C5 124.3(2) . . ?
 O2 C8 C5 113.3(2) . . ?

loop_
  _geom_hbond_atom_site_label_D
  _geom_hbond_atom_site_label_H
  _geom_hbond_atom_site_label_A
  _geom_hbond_distance_DH
  _geom_hbond_distance_HA
  _geom_hbond_distance_DA
  _geom_hbond_angle_DHA
  _geom_hbond_site_symmetry_A
 O2 H2 N1 0.82 1.92 2.734(3) 174.1 .

loop_
  _refln_index_h
  _refln_index_k
  _refln_index_l
  _refln_F_squared_meas
  _refln_F_squared_sigma
 0 -15 0 2.9 2.83
 0 -15 1 4.78 2.85
 0 -14 0 18.24 4.43
 0 -14 -1 19.03 4.43
 0 -14 1 16.55 3.89
 0 -14 -2 9.26 3.46
 0 -14 2 6.17 2.84
 0 -14 3 18.3 4.32
 0 -14 -3 24.45 5.27
 0 -14 4 17.39 4.3
 0 -14 4 12.27 3.75
 0 -13 0 6.55 2.94
 0 -13 1 6.35 2.53
 0 -13 -1 12.32 3.79
 0 -13 2 1.76 2.26
 0 -13 -2 2.32 2.36
 0 -13 3 -0.81 2.25
 0 -13 3 1.68 2.45
 0 -13 -3 4.48 2.85
 0 -13 4 4.84 3.06
 0 -13 -4 5.1 3.34
 0 -13 4 -1.12 2.29
 0 -13 -5 2.29 2.98
 0 -13 5 5.32 3.35
 0 -13 6 2.07 2.32
 0 -12 0 26.68 4.6
 0 -12 1 33.4 4.99
 0 -12 -1 33.35 5.23
 0 -12 2 78.13 7.09
 0 -12 -2 67.65 7.33
 0 -12 2 61.86 6.73
 0 -12 3 66.96 7.01
 0 -12 3 63.89 6.93
 0 -12 -3 59.1 7.07
 0 -12 4 41.52 5.86
 0 -12 -4 33.27 5.53
 0 -12 4 35.79 5.4
 0 -12 -5 19.03 4.46
 0 -12 5 18.39 4.24
 0 -12 -6 9.24 3.49
 0 -11 0 0.81 1.8
 0 -11 -1 24.32 4.29
 0 -11 1 20.52 4.01
 0 -11 2 -0.42 1.67
 0 -11 2 0.96 1.76
 0 -11 -2 5.27 2.38
 0 -11 3 4.42 2.22
 0 -11 3 4.01 2.16
 0 -11 -3 4.95 2.4
 0 -11 -4 55.22 6.61
 0 -11 4 55.07 6.48
 0 -11 5 6.81 2.78
 0 -11 -5 7.27 2.71
 0 -11 -6 5.06 3.3
 0 -11 6 8.3 3.62
 0 -11 -7 20.06 5.08
 0 -10 0 783.34 24.28
 0 -10 1 339.22 13.6
 0 -10 1 328.99 14.39
 0 -10 -1 325.78 14.52
 0 -10 2 166.86 9.59
 0 -10 2 154.1 9.54
 0 -10 -2 165.38 10.24
 0 -10 3 8.22 1.27
 0 -10 3 6.98 2.42
 0 -10 -3 8.04 2.93
 0 -10 -4 81.55 7.71
 0 -10 4 89.51 5.06
 0 -10 4 89.33 7.79
 0 -10 -5 133.96 10.36
 0 -10 5 140.51 10.24
 0 -10 5 130.66 7.39
 0 -10 6 71.18 7.87
 0 -10 -6 70.16 7.87
 0 -10 7 44.48 6.63
 0 -10 -7 39.5 6.37
 0 -10 -8 47.98 7.11
 0 -9 0 -0.59 1.4
 0 -9 -1 2.08 1.49
 0 -9 1 1.69 1.14
 0 -9 1 2.48 1.69
 0 -9 -2 1.41 1.77
 0 -9 2 0.89 1.29
 0 -9 2 -0.06 1.49
 0 -9 3 51.39 5.21
 0 -9 3 43.71 2.98
 0 -9 -3 47.84 5.37
 0 -9 4 60.71 4.4
 0 -9 -4 52.09 5.84
 0 -9 4 60.03 6.1
 0 -9 4 61.17 4.34
 0 -9 5 25.12 3.35
 0 -9 5 23.01 4.3
 0 -9 -5 25.83 4.46
 0 -9 6 16.71 3.33
 0 -9 6 20.21 4.5
 0 -9 -6 20.21 4.35
 0 -9 -7 14.2 3.94
 0 -9 7 13.82 3.29
 0 -9 7 15.62 3.97
 0 -9 -8 1.69 2.48
 0 -8 0 93.04 6.46
 0 -8 1 110.47 6.59
 0 -8 1 108.12 6.93
 0 -8 -1 101.7 6.89
 0 -8 -2 249.53 11.45
 0 -8 2 267.14 9.78
 0 -8 2 256.39 10.96
 0 -8 2 243.95 6.61
 0 -8 3 31.39 3.92
 0 -8 3 32.26 3
 0 -8 -3 32.3 4.26
 0 -8 3 33.18 1.76
 0 -8 3 33.22 2.69
 0 -8 4 95.46 5.09
 0 -8 4 103.57 5.66
 0 -8 -4 105.61 7.81
 0 -8 4 103.75 7.56
 0 -8 -5 71.43 6.82
 0 -8 5 69.15 5.28
 0 -8 5 67.21 6.56
 0 -8 6 77.77 7.54
 0 -8 -6 73.69 7.34
 0 -8 6 72.35 6.1
 0 -8 -7 29.58 5.05
 0 -8 7 31.06 4.95
 0 -8 7 32.28 4.62
 0 -8 8 52.5 7.16
 0 -8 -8 37.06 6.18
 0 -8 8 34.12 5.22
 0 -8 -9 22.37 5.08
 0 -8 9 20.78 4.69
 0 -7 0 15.33 2.71
 0 -7 0 16.06 2.48
 0 -7 -1 -1.39 1.32
 0 -7 1 0.69 0.96
 0 -7 1 -0.04 0.98
 0 -7 1 0.34 1.1
 0 -7 2 -0.39 1.39
 0 -7 -2 0.66 1.11
 0 -7 2 0.51 0.67
 0 -7 2 0.66 0.5
 0 -7 -3 8.44 2.31
 0 -7 3 7.24 1.96
 0 -7 3 6.63 1.26
 0 -7 3 6.25 1.27
 0 -7 4 65.4 4.57
 0 -7 4 68.06 3.72
 0 -7 -4 70.01 6.08
 0 -7 4 71.1 5.91
 0 -7 -5 -0.55 1.46
 0 -7 5 2.86 1.52
 0 -7 5 -0.06 0.63
 0 -7 5 1.95 2.17
 0 -7 6 3.33 1.3
 0 -7 -6 -0.17 1.53
 0 -7 6 2.19 1.79
 0 -7 6 1.13 1.93
 0 -7 7 11.65 3.57
 0 -7 7 11.99 3.1
 0 -7 -7 7.55 3.02
 0 -7 8 16.91 3.72
 0 -7 8 19.18 4.46
 0 -7 -8 10.42 3.45
 0 -7 -9 4.72 3.06
 0 -7 9 11.62 3.7
 0 -6 0 138.79 6.17
 0 -6 0 138.99 6.25
 0 -6 0 123.27 6.5
 0 -6 -1 1072.14 25.43
 0 -6 -1 1012.98 24.44
 0 -6 1 1031 22.91
 0 -6 -1 1102.56 24.06
 0 -6 1 1008.07 23.99
 0 -6 -2 1159.17 27.24
 0 -6 2 1147.48 26.23
 0 -6 2 1121.48 23.84
 0 -6 -2 1120.58 25.53
 0 -6 2 1131.6 22.49
 0 -6 -2 1136.58 27.51
 0 -6 2 1086.18 26.25
 0 -6 3 409.25 14.06
 0 -6 3 441 11.08
 0 -6 -3 434.03 14.83
 0 -6 -3 440.47 13.2
 0 -6 -3 424.92 14.45
 0 -6 4 320.22 12.79
 0 -6 4 329.35 8.65
 0 -6 -4 328.17 11.28
 0 -6 -4 325.45 13.26
 0 -6 5 132.96 8.43
 0 -6 -5 140.93 4.31
 0 -6 5 131.83 6.1
 0 -6 5 137.85 4.33
 0 -6 -5 134.07 6.89
 0 -6 -5 139.75 8.7
 0 -6 -6 312.53 8.59
 0 -6 6 325.55 9.88
 0 -6 -6 317.07 14.73
 0 -6 6 309.65 14.23
 0 -6 7 76 6.77
 0 -6 7 65.71 6.8
 0 -6 8 51.57 6.24
 0 -6 -8 62.92 7.16
 0 -6 8 63.84 7.08
 0 -6 9 23.48 4.77
 0 -6 -9 20.17 4.92
 0 -6 9 18.11 4.29
 0 -5 0 1.48 0.83
 0 -5 0 0.08 0.63
 0 -5 1 584.72 13.88
 0 -5 -1 572.18 15.16
 0 -5 1 578.59 14.99
 0 -5 -1 616.35 14.93
 0 -5 1 578.02 11.33
 0 -5 -1 612.29 16.1
 0 -5 2 10.07 1.68
 0 -5 2 5.46 0.95
 0 -5 -2 6.29 1.55
 0 -5 -2 8.33 1.6
 0 -5 -2 4.87 1.24
 0 -5 -2 6.98 1.44
 0 -5 2 7.67 1.53
 0 -5 3 3.67 0.78
 0 -5 3 6.64 1.67
 0 -5 -3 4.94 1.55
 0 -5 3 3.71 1.31
 0 -5 -3 6.46 1.62
 0 -5 -3 6.02 1.3
 0 -5 -4 3.52 0.62
 0 -5 4 5.45 1.85
 0 -5 4 3.22 0.63
 0 -5 -4 3.46 1.63
 0 -5 -4 3.1 1.09
 0 -5 -5 221.58 10.74
 0 -5 5 210.79 7.15
 0 -5 5 193.38 4.71
 0 -5 -5 207.01 8.17
 0 -5 5 209.8 10.31
 0 -5 -5 184.82 10.01
 0 -5 -6 126.4 8.77
 0 -5 -6 119.43 8.36
 0 -5 6 139.42 8.77
 0 -5 6 123.44 4.99
 0 -5 -6 121.25 6.25
 0 -5 -7 40.45 5.39
 0 -5 -7 29.29 4.72
 0 -5 7 33.22 4.6
 0 -5 8 16.04 3.68
 0 -5 8 13.8 3.52
 0 -5 -8 16.78 3.75
 0 -5 -8 11.45 3.33
 0 -5 -9 12.28 3.7
 0 -5 9 16.58 4.03
 0 -5 9 19.36 4.24
 0 -4 0 484.86 11.92
 0 -4 0 503.96 12.17
 0 -4 0 501.85 12.99
 0 -4 -1 1553.69 29.78
 0 -4 1 1475.94 28.36
 0 -4 1 1450.47 29.85
 0 -4 -1 1484.82 30.22
 0 -4 1 1453.48 29.54
 0 -4 -1 1497.86 30.87
 0 -4 -2 555.88 14.9
 0 -4 2 582.98 14.78
 0 -4 -2 582.17 15.14
 0 -4 -2 567.72 15.25
 0 -4 2 550.5 12.01
 0 -4 2 573.71 14.68
 0 -4 -2 570.62 13.8
 0 -4 -3 673.61 18.33
 0 -4 -3 658.82 18.3
 0 -4 3 708.01 18.25
 0 -4 -3 689.48 16.41
 0 -4 3 665.13 13.71
 0 -4 -3 723.64 13.35
 0 -4 3 645.84 17.65
 0 -4 -4 511.12 16.5
 0 -4 4 514.99 15.62
 0 -4 -4 464.04 15.81
 0 -4 -4 516.49 13.52
 0 -4 4 499.19 12.45
 0 -4 4 524.37 10.26
 0 -4 -4 498.7 15.97
 0 -4 -5 202.13 10.22
 0 -4 5 201.24 6.55
 0 -4 5 206.32 9.66
 0 -4 -5 203.5 7.57
 0 -4 -5 205.16 10.1
 0 -4 6 282.77 12.34
 0 -4 -6 287.94 9.59
 0 -4 -6 282.1 12.91
 0 -4 -6 274.2 13.07
 0 -4 -7 61.85 6.26
 0 -4 -7 57.51 6.29
 0 -4 7 76.86 6.62
 0 -4 8 86.81 7.78
 0 -4 -8 78.27 7.83
 0 -4 8 86.04 7.48
 0 -4 -9 23.23 4.91
 0 -4 9 21.25 4.42
 0 -4 9 22.75 4.33
 0 -3 0 -0.11 0.38
 0 -3 0 -0.22 0.47
 0 -3 0 0.26 0.44
 0 -3 -1 2.61 0.76
 0 -3 -1 1.66 0.56
 0 -3 -1 2.33 0.69
 0 -3 1 1.77 0.55
 0 -3 1 2.14 0.65
 0 -3 -1 0.87 0.49
 0 -3 1 2.61 0.5
 0 -3 -2 17.93 1.63
 0 -3 2 21.14 2.08
 0 -3 -2 17.99 2.05
 0 -3 2 17.32 1.88
 0 -3 -2 21.88 2.18
 0 -3 -2 18.39 1.97
 0 -3 2 19.13 1.15
 0 -3 -2 17.68 2.03
 0 -3 -3 251.29 9.47
 0 -3 3 269.56 9.08
 0 -3 -3 260.02 7.75
 0 -3 -3 255.17 9.51
 0 -3 -3 259.57 9.36
 0 -3 3 249.76 9.07
 0 -3 4 20.89 1.67
 0 -3 4 22.2 2.71
 0 -3 -4 22.27 3.01
 0 -3 -4 18.93 1.93
 0 -3 -4 21.1 2.8
 0 -3 -4 21.64 2.01
 0 -3 -4 22.18 2.96
 0 -3 5 1.32 0.66
 0 -3 -5 0.8 1.05
 0 -3 -5 2.19 0.91
 0 -3 -5 -0.23 0.99
 0 -3 -5 1.7 1.21
 0 -3 5 0.63 1.3
 0 -3 6 2.62 1.87
 0 -3 -6 1.67 1.04
 0 -3 -6 4.41 1.96
 0 -3 -6 1.87 1.43
 0 -3 6 1.51 0.8
 0 -3 -6 1.36 0.78
 0 -3 -6 0.35 0.95
 0 -3 7 2.32 1.92
 0 -3 7 0.34 0.63
 0 -3 -7 4.13 2.42
 0 -3 -7 0.04 1.15
 0 -3 -7 -0.55 1.43
 0 -3 -8 13.23 3.61
 0 -3 -8 16.64 2.88
 0 -3 8 17.99 3.62
 0 -3 8 13.88 3.46
 0 -3 9 15.71 3.7
 0 -3 9 22.27 4.39
 0 -3 -9 14.55 3.97
 0 -3 10 12.46 3.68
 0 -2 1 7.71 0.93
 0 -2 -1 7.96 0.99
 0 -2 -1 8.08 0.85
 0 -2 -1 6.85 0.93
 0 -2 1 8.02 0.97
 0 -2 1 6.57 0.58
 0 -2 -1 7.32 1.01
 0 -2 -2 868.37 19.71
 0 -2 -2 904.15 19.96
 0 -2 2 913.76 19.29
 0 -2 -2 905.94 17.31
 0 -2 -2 897.66 19.65
 0 -2 2 887.6 19.06
 0 -2 -2 882.32 17.96
 0 -2 -3 745.97 15.82
 0 -2 3 718.16 17.71
 0 -2 -3 757.82 19.07
 0 -2 3 746.21 15.06
 0 -2 -3 711.93 18.57
 0 -2 3 732.24 17.5
 0 -2 -3 729.32 18.14
 0 -2 -3 752.98 15.71
 0 -2 4 217.74 8.34
 0 -2 -4 211.66 6.5
 0 -2 4 215.06 8.6
 0 -2 -4 204.64 7.01
 0 -2 -4 231.09 9.16
 0 -2 4 219.17 6.05
 0 -2 -4 209.83 9.23
 0 -2 -4 203.86 9.51
 0 -2 5 120.47 6.58
 0 -2 -5 128.51 7.71
 0 -2 -5 124.53 5.79
 0 -2 -5 128 7.36
 0 -2 5 126.14 3.63
 0 -2 -5 120.02 4.78
 0 -2 5 124.96 7.04
 0 -2 5 122.17 4.8
 0 -2 -6 167.07 9.12
 0 -2 6 161.82 8.32
 0 -2 -6 161.33 7.47
 0 -2 -6 164.13 9.55
 0 -2 -6 165.14 7.38
 0 -2 6 156.27 5.4
 0 -2 6 157.59 4.11
 0 -2 -7 193.89 8.75
 0 -2 -7 173.48 10.84
 0 -2 7 187.08 9.62
 0 -2 -8 90.68 8.27
 0 -2 -8 94 6.49
 0 -2 8 88.07 7.07
 0 -2 9 19.66 4.27
 0 -2 9 16.71 3.6
 0 -2 -9 11.33 2.62
 0 -2 -9 14.37 3.82
 0 -2 10 36.56 5.2
 0 -1 2 21.86 1.69
 0 -1 -2 21.24 1.95
 0 -1 2 26.03 1.88
 0 -1 2 23.86 1.27
 0 -1 -2 22.62 2.1
 0 -1 -2 23.86 1.5
 0 -1 -2 23.98 1.38
 0 -1 -2 25.94 2.06
 0 -1 3 32.65 2.7
 0 -1 -3 28.58 2.8
 0 -1 3 29.15 2.34
 0 -1 -3 28.4 1.69
 0 -1 -3 30.07 2.11
 0 -1 -3 28.22 2.54
 0 -1 -3 23.5 2.6
 0 -1 3 28.18 2.39
 0 -1 -4 161.57 8.38
 0 -1 -4 176.98 7.77
 0 -1 4 193.57 7.53
 0 -1 -4 150.54 7.72
 0 -1 4 179.95 7.76
 0 -1 4 187.96 5.43
 0 -1 -4 174.1 6.44
 0 -1 4 171.42 6.91
 0 -1 4 184.46 5.2
 0 -1 -4 178.33 5.31
 0 -1 -4 179.98 6.53
 0 -1 -5 55.58 3.64
 0 -1 5 53.98 4.5
 0 -1 -5 55.34 4.89
 0 -1 -5 63.43 4.04
 0 -1 5 54.15 2.66
 0 -1 5 61.08 4.29
 0 -1 5 58.04 2.64
 0 -1 -6 257.03 9.13
 0 -1 -6 278.69 10.06
 0 -1 6 255.05 6.74
 0 -1 6 252.86 10.27
 0 -1 6 257.57 6.77
 0 -1 -6 258.08 12.25
 0 -1 7 15.59 1.38
 0 -1 -7 20.04 3.62
 0 -1 7 13.9 2.55
 0 -1 8 21.66 3.51
 0 -1 -8 18.95 4.01
 0 -1 -8 18 3.03
 0 -1 -9 5.82 3.04
 0 -1 9 7.95 2.58
 0 -1 -9 7.69 2.54
 0 -1 9 13.52 3.9
 0 -1 -10 10.41 4.11
 0 -1 10 8.05 2.67
 0 -1 -10 3.98 1.87
 0 0 2 1102.13 21.04
 0 0 2 1063.84 19.74
 0 0 -2 1076.18 20.95
 0 0 -2 1094.64 20.4
 0 0 2 1062.03 21.08
 0 0 2 1088.58 22.02
 0 0 -3 118.12 4.63
 0 0 3 115.39 5.31
 0 0 -3 120.83 4.18
 0 0 3 112.8 4.69
 0 0 3 115.25 3.53
 0 0 3 121 4.13
 0 0 3 124.83 4.77
 0 0 4 740.14 17.42
 0 0 4 738.92 14.9
 0 0 4 717.61 18.85
 0 0 4 750.86 15.89
 0 0 -4 755.03 17.37
 0 0 -4 720.4 16.16
 0 0 4 744 17.82
 0 0 -5 933.74 21.46
 0 0 5 890 17.9
 0 0 5 908.33 21.53
 0 0 -5 892.69 19.89
 0 0 5 879.61 23.21
 0 0 5 921.94 19
 0 0 6 305.59 10.92
 0 0 -6 285.14 9.11
 0 0 6 290.28 7.1
 0 0 -6 301.25 10.76
 0 0 6 315.59 8.37
 0 0 -7 356.03 15.82
 0 0 -7 376.84 13.24
 0 0 7 363.73 9.55
 0 0 7 360.3 13.09
 0 0 -8 147.26 8.33
 0 0 -8 131.29 10
 0 0 8 133.85 7.98
 0 0 9 33.08 4.36
 0 0 9 45.36 6.19
 0 0 -9 40.61 4.88
 0 0 -9 34.29 5.57
 0 0 -10 38.77 5.18
 0 0 -10 34.77 6.14
 0 1 2 23.31 1.92
 0 1 2 20.94 1.59
 0 1 -2 25.07 1.79
 0 1 2 23.08 1.33
 0 1 2 22.63 1.46
 0 1 -2 26.35 1.78
 0 1 -3 27.84 1.68
 0 1 3 28.45 2.08
 0 1 3 30.61 2.67
 0 1 3 28.12 1.66
 0 1 3 26.02 1.98
 0 1 -3 29.62 2.3
 0 1 4 181.88 6.16
 0 1 4 182.47 6.68
 0 1 -4 181.76 5.57
 0 1 -4 192.04 7.07
 0 1 4 177.93 6.39
 0 1 4 176.27 5.18
 0 1 4 174.67 7.71
 0 1 -5 61.44 4.24
 0 1 5 62.14 3.92
 0 1 5 49.99 3.12
 0 1 -5 62.92 3.21
 0 1 5 65.14 4.26
 0 1 5 56.21 4.62
 0 1 5 55.64 2.63
 0 1 -6 283.8 10.38
 0 1 6 252.69 9.48
 0 1 6 269.42 8.23
 0 1 -6 254.3 7.77
 0 1 6 254.97 6.62
 0 1 7 17.56 1.94
 0 1 -7 13.64 2.67
 0 1 7 14.5 2.33
 0 1 -8 17.8 3.92
 0 1 8 14.29 2.7
 0 1 9 8.71 2.35
 0 1 -9 8.91 3.05
 0 1 9 11.08 3.49
 0 1 -9 7.76 2.65
 0 1 -10 6.93 2.84
 0 1 -10 10.16 3.77
 0 2 0 1560.26 28.26
 0 2 -1 8.02 0.93
 0 2 -1 7.23 0.85
 0 2 1 5.67 0.85
 0 2 1 7.59 1.02
 0 2 1 6.44 0.95
 0 2 1 6.31 0.83
 0 2 2 907.64 19.98
 0 2 2 917.3 19.99
 0 2 2 829.94 18.44
 0 2 2 885.63 17.79
 0 2 -2 907.28 18.68
 0 2 -2 891.76 18.67
 0 2 2 884.47 16.99
 0 2 2 896.05 19.6
 0 2 -3 754.52 17.11
 0 2 -3 750.82 17.15
 0 2 3 762.93 15.72
 0 2 3 721.03 16.7
 0 2 3 730.68 15.53
 0 2 3 735.25 18.28
 0 2 4 226.07 7.56
 0 2 4 220.49 6.49
 0 2 -4 237.05 8.28
 0 2 4 233.73 9.32
 0 2 4 224.95 7.29
 0 2 5 131.8 4.67
 0 2 -5 131.05 6.43
 0 2 5 118.41 5.7
 0 2 5 130.48 5.61
 0 2 5 125.91 7.26
 0 2 5 133.56 5.68
 0 2 6 162.36 6.5
 0 2 6 153.96 6.87
 0 2 -6 182.59 8.29
 0 2 -7 190.52 9.25
 0 2 7 177.77 8.08
 0 2 7 192.57 7.31
 0 2 8 90.95 6.12
 0 2 -8 114.1 7.54
 0 2 -9 22.41 3.91
 0 2 -9 26.06 4.95
 0 2 9 24.33 4.71
 0 2 -10 44.96 6.74
 0 3 0 -0.13 0.28
 0 3 0 -0.18 0.37
 0 3 0 0.48 0.43
 0 3 -1 1.74 0.62
 0 3 1 1.86 0.65
 0 3 -1 1.59 0.61
 0 3 1 1.26 0.43
 0 3 1 1.93 0.68
 0 3 2 18.17 1.96
 0 3 2 16.9 1.73
 0 3 2 16.43 1.91
 0 3 -2 17.7 1.79
 0 3 2 18.67 1.19
 0 3 2 18.55 2.11
 0 3 -2 19.77 1.85
 0 3 3 240.02 8.08
 0 3 3 280.97 9.99
 0 3 3 242.29 7.37
 0 3 3 257.78 6.66
 0 3 3 249.26 9.63
 0 3 -3 245.66 8.28
 0 3 -3 251.92 8.32
 0 3 3 238.08 9.08
 0 3 4 20.17 2.2
 0 3 -4 21.52 2.44
 0 3 4 19.16 1.81
 0 3 4 20.59 2.78
 0 3 -4 26.06 2.67
 0 3 -5 1.18 1.1
 0 3 5 1.04 0.83
 0 3 6 2.94 1.14
 0 3 6 3.19 1.22
 0 3 -6 3.25 1.74
 0 3 -7 -0.45 1.56
 0 3 7 1.98 1.35
 0 3 7 2.6 1.21
 0 3 8 20.08 2.51
 0 3 -8 24.43 3.8
 0 3 8 20.05 4.18
 0 3 8 21.79 2.95
 0 3 9 20.71 4.31
 0 3 -9 26.21 4.35
 0 3 -10 5.91 3.33
 0 4 0 494.04 11.38
 0 4 0 519.91 12.11
 0 4 0 509.52 11.71
 0 4 1 1489.31 28.54
 0 4 -1 1439.91 28.86
 0 4 -1 1487.87 29.3
 0 4 1 1498.84 29.98
 0 4 1 1455.74 30.49
 0 4 1 1440.17 29.11
 0 4 2 571.47 15.3
 0 4 2 515.85 13.74
 0 4 -2 587.35 14.04
 0 4 2 582.64 14.76
 0 4 2 531.77 14.95
 0 4 -2 569.39 14.1
 0 4 3 721.9 19.2
 0 4 3 714.19 18.57
 0 4 3 646.19 16.68
 0 4 3 678.67 18.48
 0 4 3 669.89 14.08
 0 4 -3 664.31 16.86
 0 4 -3 711.32 17.27
 0 4 -4 515.96 14.67
 0 4 4 528.03 14.45
 0 4 4 520.42 12.19
 0 4 4 512.75 16.34
 0 4 -5 198.99 5.29
 0 4 5 218.21 8.41
 0 4 -5 206.8 8.82
 0 4 5 214.78 7.27
 0 4 -6 277.09 7.77
 0 4 -6 291.34 11.56
 0 4 7 59.86 4.22
 0 4 7 62.74 4.54
 0 4 -7 67.84 5.7
 0 4 8 94.09 8.16
 0 4 8 97.35 5.79
 0 4 -8 99.11 7.4
 0 4 9 25.48 4.75
 0 4 -9 29.53 4.6
 0 5 0 1.05 0.59
 0 5 0 2.29 0.94
 0 5 0 0.79 0.61
 0 5 1 611.05 16.11
 0 5 1 584.75 15.27
 0 5 1 565.98 13.94
 0 5 -1 592.19 14.71
 0 5 -1 575.26 14.1
 0 5 1 584.63 11.78
 0 5 1 602.6 14.53
 0 5 2 7.66 1.46
 0 5 -2 8.43 1.54
 0 5 -2 8.96 1.46
 0 5 2 8.34 1.73
 0 5 2 10.25 1.66
 0 5 2 11.4 1.96
 0 5 -3 6.24 1.47
 0 5 3 4.76 1.43
 0 5 3 4.47 1.3
 0 5 3 4.46 1.36
 0 5 3 5.67 0.84
 0 5 4 4.53 0.88
 0 5 4 2.86 1.58
 0 5 4 3.42 1.43
 0 5 -4 2.68 1.32
 0 5 5 207.2 6.97
 0 5 5 217.77 8.96
 0 5 -5 204 9.08
 0 5 -6 138.13 7.79
 0 5 6 127.77 5.9
 0 5 6 131.51 6.94
 0 5 7 38.22 3.27
 0 5 -7 41.11 4.69
 0 5 7 40.01 5.07
 0 5 7 31.66 3.57
 0 5 -8 21.69 3.98
 0 5 8 15.84 2.73
 0 5 -9 21.55 4.4
 0 5 9 17.72 4.25
 0 6 0 131.36 5.43
 0 6 0 121.16 4.95
 0 6 0 119.99 5.47
 0 6 1 1027.84 24.35
 0 6 -1 1035.86 23.35
 0 6 1 1036.48 22.68
 0 6 -1 1004.4 22.52
 0 6 1 1056.1 19.48
 0 6 1 997.42 22.95
 0 6 2 1111.88 27.26
 0 6 -2 1121.07 24.92
 0 6 2 1099.14 22.77
 0 6 2 1107.36 26.15
 0 6 2 1071.87 25.07
 0 6 2 1137.91 27.2
 0 6 -2 1120.07 25.44
 0 6 2 1124.15 23.93
 0 6 3 424.33 9.82
 0 6 -3 433.93 13.13
 0 6 3 424.67 14.05
 0 6 3 388.13 12.76
 0 6 4 324.94 12.96
 0 6 4 322.58 8.3
 0 6 4 327.38 11.56
 0 6 -4 319.15 11.57
 0 6 -5 126.7 7.28
 0 6 5 136.48 5.23
 0 6 5 140.73 7.4
 0 6 6 328.97 12.25
 0 6 -6 321.02 12.91
 0 6 7 73.46 6.96
 0 6 7 71.31 5.43
 0 6 -7 68.79 6.1
 0 6 8 58.41 5.12
 0 6 -8 68.2 6.46
 0 6 8 58.91 6.73
 0 6 9 24.16 4.68
 0 7 0 7.83 1.55
 0 7 0 8.04 1.72
 0 7 0 7.58 1.61
 0 7 1 -0.29 0.75
 0 7 1 0.31 0.9
 0 7 1 1.57 0.36
 0 7 -1 1.07 0.97
 0 7 -1 1.3 1.01
 0 7 1 0.11 0.92
 0 7 1 -0.36 0.75
 0 7 2 -0.86 1.08
 0 7 2 -0.02 0.66
 0 7 2 0.3 1.02
 0 7 2 0.73 0.65
 0 7 -2 1.34 1.17
 0 7 -3 2.58 1.22
 0 7 3 8.53 1.59
 0 7 3 7 1.51
 0 7 3 4.88 0.88
 0 7 3 5.83 1.8
 0 7 3 4.98 1.69
 0 7 4 67.55 4.86
 0 7 4 70.18 3.09
 0 7 4 58.36 5.38
 0 7 4 62.51 4.94
 0 7 -4 64.59 4.93
 0 7 -5 3.36 1.76
 0 7 5 2.11 2.11
 0 7 5 4.3 2
 0 7 5 2.7 1.82
 0 7 5 1.44 0.74
 0 7 6 3.32 2.01
 0 7 6 3.14 1.8
 0 7 -6 2.13 1.39
 0 7 7 14.8 3.48
 0 7 -7 9.86 2.99
 0 7 7 12.26 2.72
 0 7 8 20.5 4.28
 0 7 -8 26.3 4.55
 0 7 8 16.72 3.09
 0 7 9 8.65 3.33
 0 8 0 99.54 5.5
 0 8 0 102.02 5.69
 0 8 0 92.57 4.84
 0 8 -1 112 5.7
 0 8 1 110.78 6.07
 0 8 1 111.56 5.76
 0 8 1 112.42 4.99
 0 8 1 106.83 6.69
 0 8 2 240.64 9.95
 0 8 2 246.52 7.33
 0 8 -2 261.88 9.71
 0 8 2 247.62 9.07
 0 8 2 252.21 10.9
 0 8 3 33.56 2.88
 0 8 3 30.33 3.51
 0 8 3 32.95 2.99
 0 8 3 36.42 4.15
 0 8 -3 25.46 3.18
 0 8 -4 109.31 6.7
 0 8 4 112.34 4.01
 0 8 4 95.17 6.47
 0 8 4 110.53 7.6
 0 8 4 88.28 5.18
 0 8 4 106.82 6.19
 0 8 5 62.64 5.3
 0 8 -5 70.79 5.68
 0 8 5 60.31 6.1
 0 8 5 71.31 5.72
 0 8 6 76.05 6.48
 0 8 -6 63.76 5.81
 0 8 6 63.82 5.66
 0 8 7 28.03 4.58
 0 8 -7 29.08 4.35
 0 8 7 33.43 4.26
 0 8 8 36.32 5.4
 0 8 -8 40.87 5.27
 0 8 8 48.34 5.15
 0 9 0 0.64 0.97
 0 9 1 4.98 1.77
 0 9 1 2.82 1.28
 0 9 -1 3.16 1.39
 0 9 1 0.56 0.7
 0 9 1 2.51 1.74
 0 9 2 0.44 1.23
 0 9 2 0.17 0.56
 0 9 2 1.01 1.54
 0 9 -2 0.68 1.2
 0 9 2 -0.21 0.83
 0 9 2 -0.02 0.69
 0 9 3 45.55 3.8
 0 9 3 49.48 4.98
 0 9 -3 47.52 4.37
 0 9 3 49.63 3.61
 0 9 3 47.03 4.61
 0 9 4 57.15 5.78
 0 9 4 62.05 4.69
 0 9 -4 52.21 4.9
 0 9 4 51.79 5.08
 0 9 -5 26 3.7
 0 9 5 28.44 3.94
 0 9 5 26.7 3.6
 0 9 5 27.67 4.41
 0 9 -6 21.45 3.88
 0 9 6 21.97 3.55
 0 9 6 14.64 3.12
 0 9 7 15.07 3.07
 0 9 7 19.39 4
 0 9 -7 16.12 3.55
 0 9 8 0.97 2.14
 0 10 0 813.84 20.31
 0 10 -1 346.49 12
 0 10 1 364.24 14.58
 0 10 1 336.07 12.65
 0 10 1 336.79 10.63
 0 10 -2 162.46 8.11
 0 10 2 154.3 6.28
 0 10 2 165.12 9.64
 0 10 2 164.67 8.72
 0 10 -3 9.65 2.35
 0 10 3 6.28 1.19
 0 10 3 5.04 1.61
 0 10 3 7.07 2.16
 0 10 3 6.83 2.36
 0 10 3 5.31 1.27
 0 10 -4 97.23 6.79
 0 10 4 84.18 7.22
 0 10 4 95.67 7.18
 0 10 4 81.14 5.47
 0 10 5 149.33 9.22
 0 10 -5 123.86 8.28
 0 10 5 136.2 9.76
 0 10 5 135.21 8.17
 0 10 6 76.66 6.85
 0 10 6 89.81 7.36
 0 10 -6 79.04 6.87
 0 10 6 71.68 7.68
 0 10 7 40 5.1
 0 10 7 38.16 5.33
 0 10 -7 45.3 5.68
 0 11 0 2.22 1.28
 0 11 1 29.67 2.9
 0 11 -1 31.84 3.64
 0 11 1 18.45 3.42
 0 11 2 -1.09 1.6
 0 11 -2 -0.06 1.23
 0 11 2 1.79 0.84
 0 11 3 8.05 2.52
 0 11 -3 4.8 1.84
 0 11 3 7.14 2.31
 0 11 -4 52.64 5.22
 0 11 4 50.47 5.55
 0 11 4 55.91 6.22
 0 11 -5 12.28 2.98
 0 11 5 10.7 3.31
 0 11 5 12.84 3.57
 0 11 6 2.3 2.36
 0 11 -6 3.24 2.4
 0 11 6 3.76 2.79
 0 12 0 35.09 3.57
 0 12 -1 43.49 4.13
 0 12 1 38.83 5.12
 0 12 1 41.96 3.58
 0 12 2 101.06 8.18
 0 12 -2 80.26 6.04
 0 12 3 64.58 6.85
 0 12 -3 54.09 5.24
 0 12 -4 39.84 4.8
 0 12 4 35.84 5.37
 0 12 5 15.55 3.78
 0 12 -5 19.16 3.64
 0 12 6 10.16 3.58
 0 12 -6 10.68 3.1
 0 13 0 3.4 2.44
 0 13 0 1.9 1.47
 0 13 1 1.83 1.96
 0 13 -1 3.89 1.84
 0 13 -2 -2.25 1.86
 0 13 2 -0.44 2.16
 0 13 -3 0.56 1.55
 0 13 3 1.48 2.33
 0 13 -4 3.67 2.16
 0 13 4 4.29 2.65
 0 13 5 3.93 2.97
 0 13 -5 3.13 2.43
 0 14 0 26.29 4.83
 0 14 -1 27.01 3.63
 0 14 1 30.16 5.27
 0 14 -2 13.34 3.09
 0 14 2 11.02 3.37
 0 14 3 22.98 4.74
 0 14 -3 17.72 3.5
 0 14 -4 16.6 3.56
 0 14 4 20.13 4.63
 0 15 0 2.85 2.32
 0 15 1 0.54 2.23
 0 15 2 -0.17 2.11
 0 15 -3 4.42 2.48
 0 15 -4 1.08 2.05
 0 16 0 11.5 4.3
 0 16 -1 13.63 4.27
 -1 -15 3 14.92 4.07
 1 -15 0 9.26 3.55
 1 -15 1 1 1.96
 1 -15 2 5.41 2.96
 -1 -14 4 0.81 2.15
 -1 -14 4 3.7 3.19
 -1 -14 3 5.46 2.67
 -1 -14 3 12.42 3.77
 1 -14 -3 11.71 4.2
 -1 -14 2 7.99 3.5
 1 -14 -2 11.34 3.7
 1 -14 -1 5.4 2.84
 -1 -14 1 5.94 3.09
 1 -14 0 2.1 2.67
 -1 -14 0 2.63 2.38
 1 -14 1 9.8 3.51
 -1 -14 -1 10.39 3.42
 1 -14 2 25.26 4.98
 -1 -14 -2 20.06 4.71
 1 -14 3 2.56 2.52
 -1 -14 -3 3.65 2.42
 1 -14 4 -0.87 2.07
 1 -14 5 -1 2.48
 -1 -13 5 30.26 5.57
 1 -13 -5 32.89 6.12
 -1 -13 4 64.57 7.21
 1 -13 -4 52.79 7.2
 -1 -13 4 57.17 7.31
 1 -13 -3 70.59 7.99
 -1 -13 3 66.37 7.59
 -1 -13 3 68.57 7.14
 1 -13 -2 49.37 6.66
 -1 -13 2 55.38 6.78
 -1 -13 2 53.82 5.98
 1 -13 -1 80.27 8.12
 -1 -13 1 74.75 7.87
 -1 -13 0 47.67 6.27
 1 -13 0 51.82 6.36
 -1 -13 -1 78.59 8.07
 1 -13 1 57.94 6.8
 1 -13 2 39.1 5.59
 -1 -13 -2 37.87 5.91
 1 -13 3 69.67 7.41
 -1 -13 -3 67.58 7.88
 1 -13 4 32.38 5.78
 1 -13 4 30.81 5.19
 -1 -13 -4 33.15 5.72
 1 -13 5 34.11 5.5
 -1 -13 -5 32.22 5.94
 -1 -12 6 1.78 2.75
 1 -12 -6 4.57 3.43
 1 -12 -5 8.84 3.4
 -1 -12 5 13.12 3.79
 1 -12 -4 4.3 2.62
 -1 -12 4 0.2 1.98
 1 -12 -3 4.12 2.69
 -1 -12 3 -2.54 2.52
 -1 -12 3 1.18 2.14
 -1 -12 2 19.17 3.9
 1 -12 -2 13.73 3.66
 -1 -12 2 18.54 3.45
 -1 -12 1 0.51 1.82
 -1 -12 1 -0.25 1.62
 1 -12 -1 3.53 2.52
 -1 -12 0 5.63 2.45
 1 -12 0 5.26 2.39
 1 -12 1 0.95 2.01
 -1 -12 -1 2.78 2.23
 1 -12 2 1.45 1.7
 -1 -12 -2 2.24 2.22
 -1 -12 -3 13.34 3.46
 1 -12 3 14.11 3.52
 1 -12 4 12.53 3.51
 -1 -12 -4 10.33 3.37
 1 -12 4 12.45 3.54
 1 -12 5 15.96 3.9
 1 -12 5 19.96 4.93
 -1 -12 -5 6.28 2.88
 1 -12 6 0.72 1.96
 -1 -12 -6 -1.11 1.99
 1 -11 -7 29.05 5.83
 1 -11 -6 51.57 7.03
 -1 -11 6 60.58 7.27
 -1 -11 5 11.38 3.33
 1 -11 -5 18.11 4.42
 1 -11 -4 24.32 4.55
 -1 -11 4 23.92 4.1
 -1 -11 3 62.83 6.21
 1 -11 -3 74.43 7.46
 -1 -11 2 107.29 8.64
 -1 -11 2 113.7 8.03
 1 -11 -2 116.26 8.97
 -1 -11 1 36.51 5.02
 -1 -11 1 25.03 3.58
 1 -11 -1 35.96 5.05
 1 -11 0 1.27 1.73
 -1 -11 0 -0.17 1.76
 -1 -11 -1 118.08 8.89
 1 -11 1 108.01 8.27
 1 -11 2 79.22 7.08
 -1 -11 -2 83.32 7.62
 1 -11 3 24.97 4.41
 -1 -11 -3 23.68 4.32
 1 -11 3 27.23 4.3
 -1 -11 -4 10.7 3.44
 1 -11 4 9.77 3.03
 1 -11 4 7.6 2.92
 -1 -11 -5 23.95 4.6
 1 -11 5 19.78 4.64
 1 -11 5 21.26 4.26
 -1 -11 -6 31.71 5.42
 1 -11 6 32.23 6.09
 -1 -11 -7 13.75 4.29
 1 -10 -8 0.52 3.09
 1 -10 -7 -0.71 2.27
 -1 -10 7 -0.56 2.63
 -1 -10 6 5.88 3.09
 1 -10 -6 3.37 2.94
 -1 -10 5 0.67 1.74
 1 -10 -5 -1.05 2.03
 -1 -10 4 -3.49 2.33
 1 -10 -4 0.49 1.57
 1 -10 -3 10.96 3
 -1 -10 3 11.5 2.57
 -1 -10 3 14.24 1.53
 -1 -10 2 4.37 1.72
 1 -10 -2 6.92 2.67
 -1 -10 1 36.18 4.75
 -1 -10 1 41.35 4.23
 1 -10 -1 37.65 4.81
 -1 -10 0 44.94 5.15
 1 -10 0 43.58 4.87
 -1 -10 -1 51.15 5.54
 1 -10 1 54.15 5.49
 1 -10 2 -0.51 1.6
 -1 -10 -2 2.11 2.07
 1 -10 2 0.19 1.34
 1 -10 3 -1.67 2.09
 1 -10 3 0.99 1.69
 -1 -10 -3 0.97 1.51
 1 -10 4 0.47 1.73
 -1 -10 -4 -0.19 1.62
 1 -10 4 2.28 1.33
 1 -10 4 0.66 2.07
 1 -10 5 16.02 3.87
 -1 -10 -5 18.98 4.29
 1 -10 6 3.6 2.9
 -1 -10 -6 7.4 3.51
 -1 -10 -7 1.95 2.32
 1 -9 -8 8.66 3.61
 -1 -9 8 22.81 4.21
 1 -9 -7 37.64 6.02
 -1 -9 7 48.47 6.33
 -1 -9 6 98.27 8.61
 1 -9 -6 111.86 9.59
 -1 -9 5 181.12 10.69
 1 -9 -5 156.07 10.84
 1 -9 -4 72.85 7.02
 -1 -9 4 78.64 6.64
 1 -9 -3 93.24 7.5
 -1 -9 3 81.23 6.25
 1 -9 -2 200.34 10.83
 -1 -9 2 201.88 9.6
 -1 -9 1 291.96 11.37
 1 -9 -1 279.12 12.72
 -1 -9 1 311.3 13.39
 -1 -9 0 181.61 9.9
 1 -9 0 166.61 9.27
 -1 -9 0 181.45 8.22
 1 -9 1 223.93 10.85
 -1 -9 -1 241.4 11.52
 -1 -9 -2 181.25 10.07
 1 -9 2 170.72 9.27
 1 -9 2 154.43 9.34
 1 -9 3 32.06 4.1
 1 -9 3 31.82 2.42
 1 -9 3 30.13 4.42
 -1 -9 -3 33.72 4.5
 1 -9 3 33.24 2.98
 -1 -9 -4 162.07 10.31
 1 -9 4 173.86 10.92
 1 -9 4 162.05 8.02
 -1 -9 -5 85.6 7.67
 1 -9 5 81.51 7.95
 1 -9 5 70.73 5.92
 1 -9 5 77.37 6.05
 -1 -9 -6 45.65 6.15
 1 -9 6 52.82 5.74
 1 -9 6 45.27 6.39
 -1 -9 -7 12.39 3.73
 1 -9 7 10.58 3.27
 1 -9 7 17.36 4.5
 -1 -8 9 11.22 3.5
 1 -8 -9 8.91 3.74
 -1 -8 8 7.57 3.29
 1 -8 -8 5.67 2.82
 1 -8 -7 6.91 3.3
 -1 -8 7 16.82 4
 -1 -8 6 14.99 3.36
 1 -8 -6 11.19 3.25
 -1 -8 5 27.88 4.27
 -1 -8 5 29.38 2.63
 1 -8 -5 29.93 4.58
 -1 -8 4 73.23 6
 -1 -8 4 77.68 4.41
 1 -8 -4 75.58 6.77
 -1 -8 3 27.35 3.53
 1 -8 -3 23.18 3.81
 -1 -8 2 4.33 1.25
 -1 -8 2 9.92 2.09
 1 -8 -2 5.51 1.79
 1 -8 -1 0.96 1.51
 -1 -8 1 0.17 0.95
 -1 -8 0 21.39 2.55
 1 -8 0 28.73 3.49
 -1 -8 0 26.21 3.53
 1 -8 1 1.54 1.25
 -1 -8 -1 2.16 1.49
 -1 -8 -2 3.9 1.68
 1 -8 2 5.31 1.72
 1 -8 2 4.83 1.87
 1 -8 3 26.2 3.75
 1 -8 3 26.63 2.09
 -1 -8 -3 23.73 3.66
 1 -8 3 21.59 2.51
 1 -8 4 142.98 9.51
 1 -8 4 133.66 7.28
 -1 -8 -4 138.55 9.05
 -1 -8 -5 42.1 5.28
 1 -8 5 54.13 4.76
 1 -8 5 48.69 5.91
 1 -8 5 51.38 5.05
 1 -8 6 28.08 4.29
 1 -8 6 39.87 5.73
 -1 -8 -6 26.36 4.42
 1 -8 7 19.4 4.42
 -1 -8 -7 23.09 4.65
 1 -8 7 20.18 4.32
 1 -8 8 29.55 5.42
 1 -7 -9 40.87 6.7
 -1 -7 8 78.89 7.86
 1 -7 -8 96.37 9.34
 -1 -7 7 74.66 7.21
 1 -7 -7 86.97 8.34
 -1 -7 6 99.59 7.79
 1 -7 -6 107.81 8.73
 1 -7 -5 239.56 12.47
 -1 -7 5 235.32 11.35
 -1 -7 5 231.62 7.54
 -1 -7 4 155.21 6.04
 1 -7 -4 141.48 7.69
 1 -7 -4 150.48 9.24
 -1 -7 4 147.67 8.3
 -1 -7 3 686.62 16.45
 1 -7 -3 641.27 20.65
 -1 -7 3 689.48 13.91
 -1 -7 3 655.59 19.1
 -1 -7 2 542.77 14.04
 -1 -7 2 540.94 15.57
 -1 -7 2 517.88 14.77
 1 -7 -2 521.24 17.25
 1 -7 -1 454.96 15.17
 -1 -7 1 453.68 12.43
 -1 -7 1 446.81 13.25
 -1 -7 1 460.43 12.78
 -1 -7 0 220.56 9.6
 1 -7 0 198.33 9.05
 -1 -7 0 195.46 7.52
 1 -7 1 533.94 16.23
 -1 -7 -1 553.51 16.92
 1 -7 1 520.72 16.53
 1 -7 2 745.6 21.27
 1 -7 2 713.94 19.95
 -1 -7 -2 778.41 21.35
 1 -7 2 719.66 17.04
 1 -7 3 158.29 5.28
 1 -7 3 161.87 9.03
 1 -7 3 152.22 6.92
 -1 -7 -3 159.88 8.78
 1 -7 4 170.52 8.35
 1 -7 4 166.81 9.87
 -1 -7 -4 176.76 9.69
 1 -7 5 139.38 8.5
 1 -7 5 135.15 7.34
 -1 -7 -5 132.09 8.89
 1 -7 5 146.8 9.78
 1 -7 6 52.56 5.76
 -1 -7 -6 53.65 5.95
 1 -7 6 51.12 4.46
 1 -7 6 61.13 6.65
 1 -7 7 88.2 8.55
 1 -7 7 80.74 7.72
 -1 -7 -7 90.08 8.11
 -1 -7 -8 25.23 5
 1 -7 8 14.19 3.98
 1 -7 8 25.84 5.03
 -1 -6 9 18.36 4.19
 1 -6 -9 22.39 4.8
 1 -6 -8 16.63 4.17
 -1 -6 8 13.2 3.57
 -1 -6 7 23.74 4.17
 1 -6 -7 30.25 4.87
 -1 -6 6 64.57 2.7
 -1 -6 6 50.46 5.41
 1 -6 -6 64.05 3.7
 1 -6 -6 63.83 6.36
 -1 -6 5 11.75 2.72
 1 -6 -5 7.21 1.14
 1 -6 -5 5.83 2.3
 1 -6 -4 1.66 1.14
 1 -6 -4 1.94 1.44
 -1 -6 3 26.85 3.17
 1 -6 -3 23.88 2.66
 1 -6 -3 24.02 3.36
 -1 -6 3 24.06 2.72
 1 -6 -3 29.62 3.22
 -1 -6 3 25.14 1.24
 -1 -6 2 16.82 1.83
 1 -6 -2 15.09 2.27
 1 -6 -2 13.6 2.43
 -1 -6 2 18.48 2.36
 -1 -6 2 17.72 2.04
 1 -6 -1 3.14 1.4
 -1 -6 1 4.98 1.13
 -1 -6 1 3.74 0.87
 -1 -6 1 4.02 1.18
 1 -6 -1 2.74 1.03
 -1 -6 0 50.8 4.05
 1 -6 0 48.78 3.92
 -1 -6 0 48.36 2.09
 -1 -6 0 46.51 3.22
 1 -6 0 50.95 4.03
 -1 -6 0 46.38 3.1
 -1 -6 -1 10.67 1.73
 1 -6 1 14.32 2.11
 1 -6 1 11.79 2
 1 -6 1 8.42 1.82
 -1 -6 -1 10.85 1.95
 1 -6 2 233.92 10.03
 1 -6 2 247.88 8.03
 1 -6 2 255.12 9.41
 -1 -6 -2 250.11 10.07
 -1 -6 -2 252.12 10.77
 1 -6 2 244.93 7.44
 1 -6 3 32.13 3.1
 -1 -6 -3 28.05 3.33
 1 -6 3 25.56 2.74
 1 -6 3 28.29 3.66
 -1 -6 -3 33.84 3
 1 -6 4 39.95 3.43
 -1 -6 -4 34.89 4.17
 -1 -6 -4 37.35 3.27
 1 -6 4 37.64 3.85
 1 -6 4 36.06 3.51
 1 -6 4 37.64 4.49
 -1 -6 -4 35.72 4.05
 1 -6 5 24.36 2.74
 -1 -6 -5 26.4 4.11
 1 -6 5 20.23 3.59
 1 -6 5 22.79 3.52
 -1 -6 -5 20.68 3.35
 1 -6 5 17.98 2.64
 -1 -6 -5 19.05 2.46
 -1 -6 -6 1.85 1.59
 1 -6 6 2.88 1.34
 1 -6 6 3.6 2.36
 1 -6 6 3.68 2.42
 -1 -6 -6 -0.21 1.78
 -1 -6 -7 61.24 6.57
 1 -6 7 66.2 6.95
 -1 -6 -7 49.24 6.39
 1 -6 7 55.93 6.65
 -1 -6 -8 30.06 5.13
 -1 -6 -8 34.91 5.85
 1 -6 8 25.87 5.02
 1 -6 8 20.88 4.29
 -1 -5 9 46.89 6.01
 1 -5 -8 36.4 5.59
 -1 -5 8 41.59 5.32
 1 -5 -7 3.09 1.26
 1 -5 -7 1.92 1.88
 -1 -5 7 3.69 1.9
 1 -5 -6 54.97 4.58
 -1 -5 6 66.46 5.67
 1 -5 -6 50.84 5.66
 1 -5 -6 59.46 3.76
 1 -5 -5 610.97 17.5
 -1 -5 5 616.08 13.07
 1 -5 -5 604.89 20.3
 1 -5 -5 610.24 14.55
 -1 -5 5 607.25 18.66
 1 -5 -4 504.33 15.12
 1 -5 -4 487.33 15.29
 -1 -5 4 473.82 15.39
 1 -5 -4 479.67 16.77
 -1 -5 3 415.39 12.46
 1 -5 -3 398.85 13.95
 -1 -5 3 400.25 12.64
 1 -5 -3 408.88 12.76
 1 -5 -3 407.75 12.16
 1 -5 -2 6.15 1.4
 -1 -5 2 3.08 1.19
 1 -5 -2 5.34 1.57
 -1 -5 2 3.1 0.97
 -1 -5 1 208.54 6.6
 1 -5 -1 231.45 8.37
 -1 -5 1 219.41 7.22
 -1 -5 1 207.65 6.84
 1 -5 -1 209.36 8.4
 1 -5 0 50.67 3.61
 1 -5 0 51.74 3.61
 -1 -5 0 49.95 2.3
 -1 -5 0 54.15 3.18
 -1 -5 0 50.28 2.88
 -1 -5 -1 8.34 1.6
 1 -5 1 9.03 1.13
 -1 -5 -1 9.58 1.5
 1 -5 1 8.42 1.47
 1 -5 1 15.58 2.18
 1 -5 1 10.17 1.65
 1 -5 2 57.94 3.5
 -1 -5 -2 56.89 4.16
 1 -5 2 59.19 2.99
 1 -5 2 58.34 4.4
 1 -5 2 56.76 3.76
 -1 -5 -2 56.26 3.7
 -1 -5 -2 58.24 4.62
 -1 -5 -3 564.37 17.61
 -1 -5 -3 593.37 14.87
 1 -5 3 612.57 17.88
 -1 -5 -3 591.5 16.12
 -1 -5 -3 577.53 11.4
 1 -5 3 577.41 15.26
 -1 -5 -3 615.2 17.2
 1 -5 3 595.66 16.13
 -1 -5 -4 502.23 16.13
 1 -5 4 519.93 13.77
 -1 -5 -4 459.99 16.73
 -1 -5 -4 501.85 13.43
 1 -5 4 510.79 14.61
 1 -5 4 498.79 15.92
 1 -5 4 505.43 16.94
 -1 -5 -5 276.46 13.13
 1 -5 5 276.07 10.13
 1 -5 5 295.84 12.61
 -1 -5 -5 271.12 12.04
 -1 -5 -5 281.85 9.2
 1 -5 5 275.37 9.02
 1 -5 5 275.65 12.66
 1 -5 6 6.22 2.28
 1 -5 6 13.07 2.9
 -1 -5 -6 7.9 2.75
 1 -5 6 6.79 1.66
 -1 -5 -6 4.5 1.92
 1 -5 7 20.26 4.07
 -1 -5 -7 11.28 2.87
 1 -5 7 13.66 3.29
 -1 -5 -7 10.58 3.36
 -1 -5 -8 14.66 4.09
 1 -5 8 15.34 3.83
 -1 -5 -8 18.07 3.95
 1 -5 8 13.83 4
 1 -5 9 57.25 7.04
 -1 -4 9 21.28 4.12
 1 -4 -8 19.22 2.86
 -1 -4 8 14.64 3.44
 1 -4 -8 13.23 3.37
 1 -4 -8 16.68 3.97
 1 -4 -7 39.95 5.21
 -1 -4 7 40.01 4.66
 1 -4 -7 44 3.8
 -1 -4 7 37.75 3.69
 1 -4 -7 41.1 5.08
 1 -4 -6 31.64 4.37
 1 -4 -6 25.95 2.97
 1 -4 -6 22.06 2.45
 -1 -4 6 24.89 3.62
 -1 -4 5 -0.46 1.33
 1 -4 -5 0.42 1.05
 1 -4 -5 0.01 0.74
 1 -4 -5 1.67 1.55
 1 -4 -5 0.18 0.78
 1 -4 -4 76.7 5.07
 1 -4 -4 78.25 5.78
 1 -4 -4 79.68 3.66
 -1 -4 4 77.08 5.07
 1 -4 -4 75.51 4.67
 1 -4 -3 177.98 7.32
 1 -4 -3 175.26 5.44
 1 -4 -3 182.54 7.01
 -1 -4 3 180.55 7.38
 1 -4 -3 194.64 8.59
 -1 -4 3 185.16 7.22
 1 -4 -2 129.66 5.88
 -1 -4 2 137.07 4.15
 1 -4 -2 132.44 5.05
 1 -4 -2 129.66 6.39
 -1 -4 2 133.01 5.55
 -1 -4 2 142.89 5.47
 1 -4 -1 91.07 4.8
 1 -4 -1 94.28 4.71
 -1 -4 1 88.78 3.64
 -1 -4 1 94.93 4.01
 -1 -4 0 150.06 4.11
 -1 -4 0 144.14 5.19
 1 -4 0 156.26 6.04
 1 -4 0 147.54 5.94
 -1 -4 0 151.08 4.55
 -1 -4 0 151.08 4.73
 -1 -4 -1 182.37 7
 1 -4 1 191.83 7.4
 -1 -4 -1 194.82 7.8
 -1 -4 -1 191.85 6.32
 1 -4 1 188.5 5.94
 1 -4 1 177.07 6.55
 1 -4 1 189.14 6.74
 -1 -4 -1 190.19 5.71
 1 -4 2 516.86 13.32
 1 -4 2 493.59 14.52
 -1 -4 -2 494.24 15.32
 1 -4 2 538.45 11.97
 1 -4 2 508.64 13.1
 -1 -4 -2 527.98 10.39
 -1 -4 -2 516.83 14.83
 -1 -4 -2 520.69 13.13
 -1 -4 -2 508.09 14.05
 -1 -4 -3 22.05 2.98
 1 -4 3 17.96 2.62
 -1 -4 -3 18.9 1.84
 -1 -4 -3 16.82 2.28
 -1 -4 -3 21.77 3.1
 1 -4 3 20.73 2.35
 1 -4 3 18.3 2.35
 -1 -4 -3 21.18 2.32
 1 -4 3 18.92 1.93
 1 -4 4 13.58 2.47
 1 -4 4 15.95 2.15
 1 -4 4 18.45 2.85
 -1 -4 -4 14.65 2.18
 -1 -4 -4 19.69 2.72
 -1 -4 -4 14.96 1.57
 -1 -4 -4 18.03 3.05
 -1 -4 -4 18.34 1.85
 1 -4 4 17.86 1.84
 1 -4 5 0.26 1.3
 1 -4 5 0.87 0.83
 -1 -4 -5 0.34 0.56
 -1 -4 -5 1.38 1.31
 -1 -4 -5 1.54 0.76
 -1 -4 -5 1.4 1.67
 1 -4 5 1.32 1.57
 1 -4 5 1.2 0.71
 1 -4 6 21.78 3.78
 -1 -4 -6 21.48 3.53
 -1 -4 -6 26.29 4.34
 -1 -4 -6 20 2.44
 1 -4 6 22.22 3.81
 1 -4 6 20.41 2.55
 -1 -4 -7 66.66 7.11
 1 -4 7 70.07 6.72
 -1 -4 -7 59.68 5.98
 1 -4 7 75.67 7.23
 -1 -4 -7 67.97 4.72
 1 -4 8 30.17 4.93
 -1 -4 -8 25.14 4.99
 1 -4 8 37.31 5.62
 1 -4 9 46.63 6.01
 1 -4 9 47.26 6.73
 1 -3 -10 51.93 6.91
 -1 -3 10 44.06 5.82
 1 -3 -9 48.77 6.17
 -1 -3 9 52.04 5.8
 -1 -3 8 121.27 8.33
 1 -3 -8 114.91 8.89
 1 -3 -7 235.25 12.53
 -1 -3 7 236.73 11.02
 1 -3 -7 225.08 11.72
 -1 -3 7 207.52 8.71
 1 -3 -6 208.6 11.17
 -1 -3 6 224.26 8.74
 -1 -3 6 207.37 9.73
 1 -3 -6 209.91 10.5
 1 -3 -6 213.76 8.68
 -1 -3 5 385.67 12.91
 1 -3 -5 358.39 13.68
 1 -3 -5 381.25 11.92
 1 -3 -5 383.09 13.6
 1 -3 -5 385.32 14.62
 -1 -3 4 897.82 22.01
 -1 -3 4 977.55 22.35
 1 -3 -4 924.31 21.34
 1 -3 -4 926.71 22.78
 1 -3 -4 865.03 19.36
 1 -3 -4 932.88 24.2
 -1 -3 3 1698.15 35.47
 1 -3 -3 1762.64 37.6
 1 -3 -3 1785.08 35.59
 1 -3 -3 1733.27 33.2
 1 -3 -3 1736.14 35.37
 1 -3 -2 1384.49 27.18
 -1 -3 2 1386.22 28.24
 1 -3 -2 1402.2 28.93
 -1 -3 2 1397.67 25.81
 -1 -3 2 1436.59 27.93
 1 -3 -2 1425.23 26.73
 1 -3 -2 1417.27 30.06
 -1 -3 1 1462.45 27.97
 -1 -3 1 1428.71 27.4
 1 -3 -1 1448.44 29.67
 1 -3 -1 1515.71 29.52
 -1 -3 0 1204.91 23.07
 1 -3 0 1182.42 24.56
 -1 -3 0 1222.2 21.74
 1 -3 0 1208.14 24.38
 -1 -3 0 1191.53 22.38
 -1 -3 -1 1728.11 35.45
 1 -3 1 1753.21 33.57
 -1 -3 -1 1763.81 33.03
 -1 -3 -1 1759.08 33.97
 -1 -3 -1 1717.2 32.92
 1 -3 1 1779.09 33.32
 1 -3 1 1764.1 33.33
 1 -3 1 1719.17 34.76
 1 -3 1 1765.23 33
 -1 -3 -1 1711.89 31.35
 -1 -3 -1 1752.14 34.54
 1 -3 2 960.45 21.25
 -1 -3 -2 952.06 23.24
 1 -3 2 947.84 21.93
 1 -3 2 956.22 19.97
 -1 -3 -2 920.83 22.54
 -1 -3 -2 1000.99 21.33
 -1 -3 -2 1000.92 20.33
 -1 -3 -2 956.09 17.63
 1 -3 3 1564.88 32.47
 -1 -3 -3 1627.23 33.37
 -1 -3 -3 1596.07 32.22
 -1 -3 -3 1592.83 29.65
 -1 -3 -3 1590.87 30.36
 -1 -3 -3 1565.86 36.06
 -1 -3 -3 1635.78 35.7
 1 -3 3 1652.88 34.19
 1 -3 3 1609.56 30.67
 1 -3 3 1499.74 33.77
 1 -3 3 1560.68 34.72
 1 -3 4 261.44 10.54
 1 -3 4 254.64 10.3
 1 -3 4 260.33 7.12
 1 -3 4 255.16 8.86
 -1 -3 -4 235.55 9.62
 -1 -3 -4 248.99 11.13
 -1 -3 -4 256.37 7.14
 -1 -3 -4 256.51 9.79
 -1 -3 -4 264.92 9.29
 -1 -3 -4 258.4 7.55
 -1 -3 -5 332.9 8.34
 1 -3 5 325.84 8
 -1 -3 -5 335.94 12.41
 -1 -3 -5 314.17 13.78
 1 -3 5 345.68 13.04
 1 -3 5 295.53 10.23
 1 -3 5 316.77 11.49
 1 -3 5 345.73 13.49
 -1 -3 -5 317.49 9.66
 1 -3 6 146.04 7.95
 1 -3 6 159.4 9.72
 1 -3 6 154.23 8.96
 -1 -3 -6 168.2 7.08
 -1 -3 -6 153.02 8.63
 -1 -3 -6 137.48 9.5
 -1 -3 -7 126.02 6.77
 -1 -3 -7 125.36 9.76
 1 -3 7 140.25 9.81
 1 -3 7 120.91 8.46
 -1 -3 -8 44.4 6.31
 1 -3 8 41.42 5.42
 -1 -3 -8 44.59 4.33
 1 -3 8 47.25 6.15
 -1 -3 -9 26.17 5.36
 1 -3 9 20.54 4.1
 1 -3 9 26.37 5.25
 -1 -2 10 18.65 3.92
 1 -2 -10 10.37 3.6
 -1 -2 9 15.95 3.35
 1 -2 -9 20.06 4.16
 1 -2 -8 22.23 3.97
 -1 -2 8 23.32 3.57
 1 -2 -7 12.71 2.84
 -1 -2 7 14.38 1.96
 -1 -2 7 20.69 3.2
 1 -2 -7 16.79 2.63
 1 -2 -6 41.55 3.71
 -1 -2 6 42.57 4.12
 1 -2 -6 44.64 4.79
 -1 -2 6 41.49 3.38
 1 -2 -6 38.78 4.27
 1 -2 -6 38.08 3.25
 -1 -2 5 125.22 6.56
 1 -2 -5 137.21 7.38
 1 -2 -5 131.39 7.93
 1 -2 -5 134.28 6.09
 -1 -2 5 131.1 6.03
 1 -2 -5 126.68 7.54
 -1 -2 4 14.97 2.11
 1 -2 -4 12.93 2.11
 1 -2 -4 14 2.36
 1 -2 -4 12.21 1.73
 -1 -2 4 11.46 1.76
 1 -2 -4 13.26 2.02
 1 -2 -3 260.97 7.35
 1 -2 -3 259.59 9.63
 1 -2 -3 274.72 8.43
 -1 -2 3 272.7 8.58
 -1 -2 3 277.06 8.39
 1 -2 -3 262.48 8.65
 -1 -2 2 335.84 8.69
 1 -2 -2 328.2 10.06
 1 -2 -2 331.3 9.28
 -1 -2 2 336.89 9.02
 1 -2 -2 335.37 8.39
 1 -2 -2 354.61 8.24
 -1 -2 1 276.16 6.91
 1 -2 -1 283.93 7.87
 1 -2 -1 262.25 7.85
 -1 -2 1 285.22 6.69
 1 -2 0 33.08 1.94
 -1 -2 0 35.63 1.68
 1 -2 0 36.37 2.21
 -1 -2 0 33.94 1.29
 -1 -2 0 37.92 1.98
 -1 -2 0 35.91 1.42
 1 -2 1 42.53 2.3
 1 -2 1 43.17 2.54
 -1 -2 -1 41.11 2.13
 1 -2 1 42.24 2.68
 -1 -2 -1 40.51 2.87
 1 -2 1 42.44 2.26
 -1 -2 -1 40.35 2.68
 -1 -2 -1 41.8 2.3
 -1 -2 -1 37.85 2.28
 -1 -2 -2 114.57 5.9
 1 -2 2 126.03 5.14
 1 -2 2 128.73 5.38
 1 -2 2 128.32 4.09
 -1 -2 -2 121.82 3.62
 -1 -2 -2 126.33 6.08
 -1 -2 -2 130.26 4.42
 1 -2 2 132.6 5.54
 -1 -2 -2 133.68 4.93
 1 -2 3 370.14 8.29
 -1 -2 -3 343.76 12.66
 1 -2 3 382.77 11.8
 -1 -2 -3 358.87 8.16
 1 -2 3 355.67 11.08
 -1 -2 -3 359.15 8.85
 1 -2 3 368.65 11.82
 -1 -2 -3 345.41 12.38
 -1 -2 -3 356.69 9.68
 1 -2 3 361.86 10.45
 -1 -2 -3 360.37 11.28
 -1 -2 -3 380.3 10.7
 1 -2 4 181.46 7.95
 -1 -2 -4 173.73 6.08
 -1 -2 -4 174.41 7.89
 1 -2 4 166.43 6.92
 -1 -2 -4 178.32 9.14
 1 -2 4 177.24 8.53
 -1 -2 -4 175.11 7.51
 1 -2 4 174.2 4.55
 1 -2 4 180.08 6.98
 -1 -2 -4 182.09 4.73
 1 -2 5 104.65 6.47
 -1 -2 -5 96.94 4.85
 -1 -2 -5 107.49 6.26
 1 -2 5 96.81 6.78
 -1 -2 -5 109.14 7.75
 1 -2 5 98.12 5.65
 1 -2 5 100.24 5.26
 -1 -2 -5 103.53 6.26
 1 -2 6 132.7 7.42
 -1 -2 -6 164.67 7.13
 1 -2 6 168.48 9.92
 -1 -2 -6 144.15 9.83
 1 -2 6 154.61 8.52
 1 -2 7 29.93 4.04
 1 -2 7 41.26 5.48
 -1 -2 -7 31.4 3.43
 -1 -2 -7 29.66 4.9
 1 -2 8 66.29 6.37
 -1 -2 -8 69.16 5.54
 1 -2 8 59.92 7.04
 -1 -2 -8 62.39 7.33
 1 -2 9 38.58 5.27
 1 -2 9 36.34 6.09
 -1 -2 -9 41.43 6.48
 1 -1 -10 38.08 5.96
 -1 -1 10 30.86 4.57
 1 -1 -9 69.45 6.23
 -1 -1 9 65.28 6
 1 -1 -9 50.52 6.15
 -1 -1 8 22.1 3.33
 1 -1 -8 19.58 3.22
 1 -1 -8 26.38 4.32
 -1 -1 7 415.24 12.03
 1 -1 -7 407.66 16.01
 1 -1 -7 423.9 14.61
 -1 -1 7 409.65 14.44
 -1 -1 6 192.75 7.31
 -1 -1 6 185.31 8.46
 1 -1 -6 180.92 6.42
 1 -1 -6 187.93 9.48
 1 -1 -6 181.12 8.34
 -1 -1 5 201.17 7.35
 1 -1 -5 194.59 7.99
 -1 -1 5 188.69 9.35
 1 -1 -5 191.73 8.79
 -1 -1 5 185.81 7.89
 1 -1 -4 550.89 14.13
 -1 -1 4 540.61 16.23
 1 -1 -4 554.71 16.39
 -1 -1 4 523.24 13.66
 1 -1 -4 533.84 14.89
 1 -1 -4 534.54 13.74
 -1 -1 4 537.07 14.03
 1 -1 -3 415.55 11.21
 1 -1 -3 427.02 11.13
 -1 -1 3 425.71 10.92
 -1 -1 3 417.76 11.1
 1 -1 -3 423.74 10.94
 1 -1 -3 433.22 12.86
 -1 -1 2 974.35 19.51
 1 -1 -2 970.43 19.16
 1 -1 -2 976.03 20.3
 1 -1 -2 963.9 21.39
 1 -1 -1 456.76 9.54
 1 -1 -1 422.18 10.23
 -1 -1 1 423.79 9.12
 -1 -1 1 421.78 9.36
 -1 -1 1 407.58 9.11
 1 -1 -1 423.81 10.06
 -1 -1 0 1154.58 22.75
 1 -1 0 1110.13 22.39
 -1 -1 0 1201.88 21.84
 1 -1 0 1158.28 22.25
 -1 -1 0 1187.8 22.65
 1 -1 0 1139.59 21.38
 -1 -1 -1 911.85 17.33
 -1 -1 -1 934.85 18.92
 1 -1 1 923.46 18.69
 1 -1 1 902.71 17.51
 -1 -1 -1 897.61 17.36
 1 -1 1 934.55 19.19
 -1 -1 -1 929.78 19.86
 -1 -1 -1 904.65 19.5
 1 -1 1 938.26 19.13
 1 -1 2 210.52 6.96
 -1 -1 -2 221.66 5.62
 1 -1 2 220.42 4.94
 1 -1 2 206.42 6.67
 -1 -1 -2 215.53 5.22
 -1 -1 -2 217.4 7.46
 -1 -1 -2 216.86 5.8
 -1 -1 -2 212 6.08
 1 -1 2 233.45 7.63
 -1 -1 -2 212.96 8.19
 1 -1 2 205.55 7.09
 -1 -1 -3 925.43 21.56
 -1 -1 -3 939.8 19.27
 1 -1 3 908.38 19.64
 1 -1 3 916.54 21.65
 1 -1 3 925.15 20.68
 1 -1 3 971.61 22.42
 -1 -1 -3 927.7 20.1
 -1 -1 -3 892.62 18.81
 -1 -1 -3 882.96 23.38
 1 -1 3 937.09 20.59
 1 -1 4 132.05 7.22
 1 -1 4 125.93 5.83
 1 -1 4 136.77 6.39
 -1 -1 -4 131.37 6.07
 -1 -1 -4 132.39 5.36
 1 -1 4 136.21 5.95
 1 -1 4 137.13 7.01
 -1 -1 -4 135.4 6.55
 1 -1 5 120.13 6.31
 -1 -1 -5 132.77 5.95
 -1 -1 -5 119.97 6.52
 1 -1 5 136.91 8.2
 1 -1 5 132.77 6.92
 1 -1 6 282.89 11.31
 -1 -1 -6 321.33 10.77
 1 -1 6 304.95 11.97
 -1 -1 -6 303.89 11.57
 1 -1 6 299.97 13.81
 -1 -1 -7 81.11 5.53
 1 -1 7 72.95 7.16
 -1 -1 -7 75.01 7.47
 1 -1 7 70.94 5.91
 -1 -1 -8 46.59 4.57
 1 -1 8 45.79 5.1
 -1 -1 -8 44.28 6.34
 1 -1 8 38.05 5.69
 1 -1 9 16.12 3.55
 -1 -1 -9 16.85 3.27
 1 -1 9 24.19 5.21
 -1 -1 -9 20.02 4.72
 1 0 -10 14.03 3.75
 -1 0 10 17.72 3.68
 1 0 -10 21.49 4.09
 1 0 -9 -2.01 2.29
 -1 0 9 3.76 2.21
 1 0 -9 1.91 2.01
 1 0 -8 2.48 1.86
 1 0 -8 2.23 1.85
 -1 0 8 1.41 0.89
 -1 0 8 -0.46 1.4
 1 0 -7 0.88 1.37
 1 0 -7 0.4 1.45
 -1 0 7 0.18 1.16
 -1 0 7 1.99 1.17
 -1 0 7 1.01 0.79
 1 0 -6 93.74 3.49
 -1 0 6 93.42 5.68
 -1 0 6 91.32 4.72
 1 0 -6 90.03 6.43
 1 0 -6 100.35 6.02
 -1 0 5 3.82 1.1
 1 0 -5 5.09 1.57
 -1 0 5 2.8 1.41
 1 0 -5 4.82 0.74
 1 0 -5 3.85 1.44
 -1 0 4 487.71 12.62
 1 0 -4 474.66 13.63
 -1 0 4 490.23 15.18
 -1 0 4 490.85 12.8
 1 0 -4 496.25 13.27
 1 0 -3 2.11 0.74
 -1 0 3 3.49 0.9
 -1 0 3 2.51 0.91
 -1 0 3 3.44 0.88
 1 0 -3 2.79 0.86
 1 0 -2 99.26 3.42
 1 0 -2 101.39 4.1
 -1 0 2 98.71 3.69
 -1 0 2 111.03 4.28
 1 0 -2 102.51 3.87
 -1 0 2 98.87 4.66
 -1 0 1 50.36 2.58
 1 0 -1 48.99 2.19
 -1 0 -1 1131.25 20.21
 1 0 1 1120.58 22.33
 1 0 1 1107.28 22.95
 1 0 1 1069.73 20.88
 -1 0 -1 1121.68 20.78
 -1 0 -1 1070.35 22.06
 1 0 1 1106.15 22.39
 -1 0 -1 1102.88 22.42
 -1 0 -1 1093.09 22.82
 1 0 2 6.61 1.14
 -1 0 -2 6.18 1.14
 -1 0 -2 6.75 0.64
 1 0 2 6.2 1.13
 -1 0 -2 5.63 0.78
 1 0 2 5.12 0.85
 -1 0 -2 8.13 1.46
 -1 0 -2 6.49 1
 1 0 2 7.68 1.39
 1 0 2 6.03 0.77
 -1 0 -3 92.16 3.84
 -1 0 -3 95.54 4.75
 -1 0 -3 88.44 4.06
 1 0 3 87.9 4.12
 -1 0 -3 80.57 5.53
 1 0 3 86.91 3.99
 1 0 3 88.09 5.13
 1 0 3 88.93 4.65
 -1 0 -3 87.71 3.2
 1 0 4 26.62 2.89
 -1 0 -4 28.46 2.74
 1 0 4 28.75 3.41
 1 0 4 30.01 2.7
 1 0 4 26.45 2.55
 -1 0 -4 28.3 2.49
 1 0 5 79.37 4.93
 -1 0 -5 82.13 5
 1 0 5 79.01 6.2
 -1 0 -5 78.6 4.63
 1 0 5 78.48 5.01
 -1 0 -6 181.17 8.02
 -1 0 -6 159.77 7.68
 1 0 6 198.77 10.82
 1 0 6 185.17 8.53
 1 0 6 174.85 8.57
 1 0 7 13.63 2.64
 -1 0 -7 18.5 2.78
 1 0 7 24.53 4.46
 1 0 8 23.73 3.54
 1 0 8 32.9 5.34
 -1 0 -8 20.51 4.42
 -1 0 -8 29.17 3.97
 -1 0 -9 31 4.42
 -1 0 -9 17.1 4.58
 1 0 9 26.24 5.12
 -1 0 -10 30.76 4.69
 1 1 -10 27.71 4.62
 -1 1 10 29.38 4.23
 1 1 -10 30.88 5.55
 -1 1 9 56.36 5.41
 1 1 -9 58.16 5.89
 1 1 -9 57.26 6.42
 -1 1 8 23.66 2.61
 -1 1 8 23.58 3.39
 1 1 -8 20.86 3.51
 1 1 -8 25.6 4.08
 -1 1 7 407.65 11.67
 -1 1 7 407.67 13.72
 1 1 -7 413.25 14.61
 -1 1 7 396.63 12.51
 1 1 -7 411.49 15.85
 1 1 -6 200.95 8.81
 -1 1 6 176.86 6.99
 -1 1 5 186.18 6.92
 1 1 -5 203.78 8.23
 -1 1 5 191.58 7.41
 1 1 -4 562.79 14.68
 -1 1 4 555.15 13.83
 -1 1 4 568.68 13.79
 -1 1 4 529.28 16.3
 -1 1 3 416.93 10.53
 -1 1 3 429.21 12.79
 -1 1 3 418.14 10.92
 1 1 -3 440.85 11.34
 -1 1 2 964.51 19.19
 -1 1 2 919.26 18.96
 1 1 -2 951.15 19.34
 -1 1 2 945.62 19.75
 -1 1 2 956.23 20.97
 -1 1 1 411.01 9.88
 -1 1 1 412.79 9.27
 1 1 -1 427.68 9.34
 1 1 -1 432.99 9.09
 1 1 -1 413.94 9.06
 1 1 -1 420.81 9.28
 -1 1 1 418.95 10.07
 -1 1 0 1193.64 22.43
 1 1 0 1172.76 22.04
 1 1 0 1160.13 22.96
 -1 1 0 1177.2 22.64
 -1 1 0 1158.38 21.75
 1 1 0 1225.97 23.09
 -1 1 0 1171.9 21.61
 -1 1 -1 954.83 18.71
 -1 1 -1 911.76 17.33
 1 1 1 920.08 19.88
 -1 1 -1 924.73 18.55
 -1 1 -1 907.05 18.88
 -1 1 -1 930.93 19.23
 1 1 1 905.56 17.44
 1 1 1 937.75 19.3
 -1 1 -2 211.02 6.71
 1 1 2 210.58 6.23
 1 1 2 215.34 5.5
 1 1 2 212.14 6.03
 1 1 2 219.39 8.34
 1 1 2 206.01 7.36
 -1 1 -2 217.51 6.35
 -1 1 -2 216.22 7.03
 -1 1 -3 940.46 20.36
 -1 1 -3 889.54 20.55
 1 1 3 922.04 19.12
 1 1 3 894.13 20.25
 1 1 3 917.75 22.12
 1 1 3 915.84 20.04
 -1 1 -3 926.61 19.7
 1 1 4 129.99 6.08
 -1 1 -4 122.91 5.72
 1 1 4 133.55 7.3
 1 1 4 130.55 6.16
 -1 1 -4 139.25 5.79
 1 1 4 134.19 5.55
 -1 1 -4 129.35 5.92
 -1 1 -5 114.38 5.91
 -1 1 -5 127.55 6.31
 1 1 5 131.69 7.03
 1 1 5 127.85 6.7
 1 1 5 121.53 5.86
 1 1 5 133.46 8.06
 1 1 6 306.09 10.87
 1 1 6 295.65 11.8
 1 1 6 301.62 13.82
 -1 1 -6 309.67 11.17
 -1 1 -6 280.97 10.28
 1 1 7 77.66 7.41
 -1 1 -7 80.11 5.81
 1 1 7 80.56 5.64
 1 1 8 40.47 4.33
 -1 1 -8 46.41 4.79
 1 1 8 34.68 5.63
 1 1 9 16.39 4.35
 -1 1 -9 21.06 3.77
 -1 1 -9 14.79 3.99
 1 2 -10 21.19 4.35
 1 2 -10 19.84 4.06
 1 2 -9 20.27 4.14
 -1 2 9 20.24 3.29
 1 2 -9 19.14 3.88
 -1 2 8 22.07 2.65
 1 2 -8 25.82 3.68
 -1 2 8 20.05 3.07
 1 2 -8 26.31 4.22
 1 2 -7 17.52 3.1
 -1 2 7 17.16 2.1
 -1 2 7 14.37 2.31
 -1 2 7 25.16 3.1
 -1 2 6 46.88 3.93
 -1 2 6 41.57 3.18
 1 2 -6 45.52 4.15
 -1 2 5 130.82 5.87
 -1 2 5 140.74 6.03
 1 2 -5 137.62 6.77
 -1 2 4 11.41 1.67
 -1 2 4 11.61 1.55
 1 2 -4 17.44 2.28
 -1 2 4 15.56 2.49
 -1 2 3 247 7.38
 -1 2 3 262.22 9.54
 1 2 -3 261.19 8.26
 -1 2 3 267.56 8.78
 -1 2 3 269.78 8.23
 1 2 -2 332.64 7.38
 -1 2 2 318.84 9.82
 1 2 -2 321.95 8.53
 -1 2 2 322.47 7.67
 -1 2 2 322.56 8.82
 -1 2 2 321.05 8.95
 -1 2 1 283.24 7.89
 -1 2 1 269.76 6.71
 -1 2 1 276.19 7.63
 1 2 -1 265.71 6.57
 1 2 0 38.3 2.49
 1 2 0 32.08 1.9
 -1 2 0 36.64 1.99
 1 2 0 35.09 1.71
 -1 2 0 36.21 2.13
 1 2 1 40.05 2.85
 1 2 1 46.84 2.68
 -1 2 -1 42.43 2.38
 -1 2 -1 39.47 2.21
 -1 2 -1 41.7 2.1
 -1 2 -1 40.98 2.55
 -1 2 -2 122.3 4.52
 1 2 2 125.91 4.05
 -1 2 -2 125.77 5.23
 1 2 2 122.04 4.75
 1 2 2 126.41 5.47
 -1 2 -2 129.44 5.03
 1 2 2 129.71 3.23
 1 2 2 128.13 6.15
 1 2 3 383.86 10
 -1 2 -3 352.48 10.67
 1 2 3 353.16 10.55
 1 2 3 381.74 8.8
 -1 2 -3 358.74 10.38
 1 2 3 384.23 12.03
 1 2 4 175.66 7.52
 -1 2 -4 178.67 7.32
 1 2 4 181.21 6.1
 1 2 4 171.1 6.98
 -1 2 -4 177.2 7.07
 1 2 4 187.56 8.89
 -1 2 -5 108.99 5.94
 1 2 5 104.21 6.21
 1 2 5 100.87 4.94
 1 2 5 107.78 7.3
 1 2 5 99.54 5.77
 1 2 6 150.75 6.84
 -1 2 -6 159.91 7.89
 1 2 6 145.2 9.4
 -1 2 -7 27.59 3.61
 1 2 7 31.57 4.85
 1 2 7 25.63 3.04
 -1 2 -8 65.4 5.91
 1 2 8 64.42 7.34
 -1 2 -9 39.98 5
 1 2 9 38.56 6.33
 -1 3 9 45.28 4.67
 1 3 -9 50.89 5.67
 1 3 -9 47.98 5.87
 -1 3 8 120.81 6.63
 -1 3 8 117.09 7.09
 1 3 -8 140.64 8.66
 1 3 -7 245.27 10.97
 -1 3 7 230.19 8.39
 -1 3 7 213.64 9.12
 -1 3 6 218.18 8.2
 -1 3 6 204.5 8.97
 1 3 -6 236.33 9.96
 -1 3 5 376.98 12.56
 1 3 -5 368.71 12.34
 -1 3 5 389.19 11.48
 -1 3 5 360.15 10.8
 -1 3 4 941.67 24.72
 -1 3 4 985.2 21.9
 -1 3 4 954.86 20.65
 1 3 -4 945.83 22.3
 -1 3 4 916.16 23.64
 1 3 -3 1768.89 31.56
 -1 3 3 1700.72 35.44
 -1 3 3 1743.33 33.99
 -1 3 3 1861.51 36.72
 1 3 -3 1764.54 35.29
 -1 3 3 1756.08 37.79
 -1 3 2 1383.2 25.76
 -1 3 2 1344.32 28.11
 -1 3 2 1416.81 26.82
 -1 3 2 1364.12 29.32
 1 3 -2 1320.6 27.11
 -1 3 1 1444.71 29.2
 -1 3 1 1499.74 26.93
 1 3 -1 1416.77 27.36
 -1 3 1 1467.63 29.58
 1 3 0 1176.42 22.7
 1 3 0 1222.39 24.15
 -1 3 0 1222.02 24.52
 1 3 0 1240.37 22.84
 1 3 0 1216.69 21.89
 -1 3 0 1203.91 25.05
 -1 3 0 1251.51 24.5
 1 3 1 1759.73 33.52
 -1 3 -1 1773.12 34.35
 1 3 1 1666.17 34.64
 1 3 1 1759.71 35.46
 -1 3 -1 1722.83 32.64
 -1 3 -1 1730.28 32.27
 -1 3 -2 984.95 17.55
 -1 3 -2 992.14 21.46
 1 3 2 968.26 23.16
 -1 3 -2 970.75 21.83
 -1 3 -2 920.73 19.53
 1 3 2 968.31 21.64
 1 3 2 959.84 18.18
 1 3 2 965.72 21.3
 1 3 3 1604.49 34.4
 1 3 3 1598.95 30.6
 1 3 3 1589.3 33.34
 -1 3 -3 1619.43 33.41
 -1 3 -3 1548.09 31
 -1 3 -3 1654.66 33.09
 1 3 3 1596.74 29.09
 1 3 3 1561.01 36.06
 1 3 4 256.16 7.13
 -1 3 -4 248.84 9.41
 1 3 4 248.44 8.27
 1 3 4 248 10.54
 -1 3 -4 262.4 8.14
 1 3 4 269.31 10
 1 3 5 321.71 9.29
 1 3 5 310.25 13.19
 1 3 5 315.95 10.71
 -1 3 -5 333.7 11.69
 -1 3 -5 331.57 10.37
 1 3 5 318.02 12.13
 1 3 6 171.38 6.89
 -1 3 -6 159.02 8.18
 1 3 6 160.34 9.97
 -1 3 -7 146.29 8.26
 1 3 7 144 10.19
 -1 3 -7 132.9 7.19
 1 3 7 137.5 6.72
 1 3 8 49.05 6.7
 -1 3 -8 49.14 5.24
 -1 3 -9 29.7 4.57
 1 4 -9 28.97 4.5
 -1 4 8 23.23 3.27
 1 4 -8 21.85 3.73
 -1 4 8 16 2.57
 -1 4 7 36.95 3.83
 -1 4 7 37.81 3.36
 1 4 -7 47.21 4.75
 -1 4 6 24.7 3.16
 -1 4 6 26.18 2.81
 1 4 -6 32.86 3.8
 -1 4 5 -0.66 1.09
 -1 4 5 -0.06 1.26
 1 4 -5 -0.9 1.2
 -1 4 5 2.2 0.97
 -1 4 4 80.21 5.34
 -1 4 4 74.55 4.51
 -1 4 4 80.75 5.55
 1 4 -4 73.97 4.77
 -1 4 4 83.59 4.13
 -1 4 3 177.47 7.11
 -1 4 3 192.09 8.25
 1 4 -3 182.32 7.11
 -1 4 3 183.97 7.2
 -1 4 3 176.61 8.24
 -1 4 3 193.49 8.07
 -1 4 2 128.1 4.09
 -1 4 2 123.45 6.21
 1 4 -2 122.1 5.05
 -1 4 2 134.64 4.97
 -1 4 2 149.62 6.05
 -1 4 2 136.92 6.42
 1 4 -2 138.03 5.65
 1 4 -1 87.37 3.54
 -1 4 1 100.86 3.85
 1 4 -1 90.5 4
 -1 4 1 88.72 4.71
 -1 4 1 95 4.59
 -1 4 1 94.18 4.91
 -1 4 0 147.81 6.01
 1 4 0 157.2 4.76
 -1 4 0 142.99 5.66
 -1 4 0 159.79 6.1
 -1 4 0 148.36 4.36
 -1 4 0 169.02 6.04
 1 4 0 137.43 4.35
 1 4 0 146.23 3.87
 -1 4 -1 187.58 5.68
 -1 4 -1 192.7 7.12
 -1 4 -1 180.72 6.96
 1 4 1 182.41 4.6
 1 4 1 194.16 7.83
 1 4 1 186.02 6.14
 -1 4 -1 182.43 5.51
 1 4 1 190.11 7.25
 -1 4 -2 503.46 14.01
 1 4 2 523.94 14.23
 -1 4 -2 526 14.06
 -1 4 -2 517.49 10.53
 1 4 2 521.02 15.32
 1 4 2 497.82 13.47
 1 4 2 508.95 15.25
 1 4 3 19.83 2.4
 1 4 3 15.57 2.6
 1 4 3 21.13 2.56
 -1 4 -3 18.44 2.44
 1 4 3 19.63 1.47
 -1 4 -3 20.98 2.45
 -1 4 -4 18.38 1.74
 1 4 4 16.4 1.35
 1 4 4 13.59 2.24
 1 4 4 13.24 2.68
 1 4 4 15.34 1.72
 1 4 4 18.55 2.8
 -1 4 -4 20.79 2.69
 1 4 5 0.59 0.65
 -1 4 -5 1.13 0.78
 1 4 5 1.08 0.87
 1 4 5 -0.35 1.41
 -1 4 -5 -0.46 1.45
 1 4 6 21.86 2.19
 -1 4 -6 17.76 2.11
 1 4 6 23.97 2.91
 -1 4 -6 20.48 3.19
 1 4 6 24.38 4.11
 -1 4 -7 63.62 5.6
 1 4 7 61.16 6.78
 -1 4 -8 40.79 4.83
 1 4 8 35.18 5.74
 -1 4 -9 60.27 6.44
 1 5 -9 40.79 5.28
 -1 5 9 44.53 4.4
 -1 5 8 40.93 4.21
 1 5 -8 44.33 5.3
 -1 5 7 3.76 1.85
 1 5 -7 6.42 2.31
 -1 5 7 3.93 1.47
 -1 5 6 51.54 4.59
 1 5 -6 69.48 5.47
 -1 5 6 64.43 4.57
 -1 5 5 622.11 15.37
 1 5 -5 615.98 17.82
 -1 5 5 620.21 17.07
 -1 5 5 586.73 17.9
 -1 5 4 490.4 15.42
 -1 5 4 492.33 12.6
 1 5 -4 481.45 14.44
 -1 5 4 483.36 14.38
 -1 5 3 397.06 13.22
 -1 5 3 418.98 12.54
 1 5 -3 390.27 11.86
 1 5 -3 423.67 12.61
 -1 5 3 420.96 13.57
 -1 5 3 412.81 12.19
 -1 5 3 374.58 13.6
 -1 5 2 3.8 1.32
 -1 5 2 3.59 1.2
 1 5 -2 7.85 1.44
 1 5 -2 3.71 1.03
 -1 5 2 3.5 1.35
 -1 5 2 5.37 0.83
 -1 5 2 5.07 1.06
 1 5 -1 195.8 6.26
 -1 5 1 212.95 7.85
 -1 5 1 215.16 8.35
 -1 5 1 213.52 7.99
 1 5 -1 212.6 7.06
 1 5 0 49.96 2.76
 -1 5 0 56.09 3.79
 1 5 0 47.21 2.17
 -1 5 0 52.99 2.25
 -1 5 0 49.37 3.21
 -1 5 -1 9.62 1.66
 1 5 1 10.53 0.85
 -1 5 -1 10.08 1.67
 -1 5 -1 8.16 1.17
 1 5 1 7.14 1.47
 1 5 1 8.57 1.81
 1 5 1 9.36 1.29
 1 5 1 12.29 1.14
 1 5 2 63.97 4.84
 -1 5 -2 62.25 2.68
 1 5 2 58.42 2.26
 1 5 2 63.9 4.53
 1 5 2 53.37 4.41
 -1 5 -2 56.96 4.08
 1 5 2 57.95 3.73
 -1 5 -2 52.54 3.93
 1 5 3 576.95 11.72
 1 5 3 587.76 17.13
 1 5 3 593.76 18.34
 1 5 3 613.83 16.74
 -1 5 -3 587.85 16.51
 1 5 4 516.07 10.8
 1 5 4 505.74 12.08
 1 5 4 507.65 17.89
 -1 5 -4 526.08 15.85
 1 5 4 507.79 16.45
 1 5 5 282.12 9.05
 1 5 5 288.12 7.61
 -1 5 -5 294.25 11.61
 1 5 5 283.05 12.68
 1 5 6 8.2 1.33
 -1 5 -6 5.88 2.07
 1 5 6 6.55 2.59
 1 5 7 14.88 3.76
 -1 5 -7 15.62 3.11
 1 5 8 15.79 4.24
 -1 5 -8 23.51 4.1
 -1 6 9 24.17 3.61
 1 6 -9 26.04 4.35
 -1 6 8 11.54 2.59
 1 6 -8 14.83 3.4
 1 6 -7 30.38 4.25
 -1 6 7 26.25 3.63
 -1 6 6 66.92 5.41
 1 6 -6 60.43 5.36
 1 6 -5 6.06 2.1
 -1 6 5 5.18 1.72
 -1 6 5 6.38 1.79
 -1 6 5 8.3 1.45
 -1 6 4 1.98 1.32
 -1 6 4 5.23 1.64
 -1 6 4 2.54 0.84
 -1 6 4 3.64 1.42
 1 6 -4 7.26 1.87
 1 6 -3 25.84 2.75
 -1 6 3 22.03 2.96
 -1 6 3 31.92 3.28
 -1 6 3 23.97 2.62
 1 6 -2 18.51 2.14
 -1 6 2 18.46 1.53
 1 6 -2 19.89 2.32
 -1 6 2 21.54 2.73
 -1 6 2 19.28 2.16
 -1 6 2 18 2.6
 -1 6 2 21.17 2.81
 -1 6 1 3.35 1.03
 1 6 -1 4.96 1.06
 1 6 -1 3.35 0.93
 -1 6 1 5.17 1.37
 -1 6 1 4.14 1.35
 -1 6 0 48.68 3.3
 -1 6 0 52.63 2.05
 -1 6 0 49.47 3.8
 1 6 0 46.23 2.38
 1 6 0 52.81 3.1
 1 6 1 8.29 0.85
 1 6 1 10.36 1.28
 1 6 1 8.22 1.78
 1 6 1 10.2 0.73
 1 6 1 8.96 2.1
 -1 6 -1 8.79 1.72
 -1 6 -1 8.83 1.71
 -1 6 -1 10.67 1.5
 1 6 2 252.85 8.63
 -1 6 -2 258.8 7.2
 1 6 2 253.52 6.68
 -1 6 -2 241.23 9.51
 1 6 2 257.14 10.76
 1 6 3 28.25 1.69
 1 6 3 32.32 3.92
 1 6 3 31.44 3.26
 -1 6 -3 33.15 3.44
 1 6 4 39.89 2.15
 -1 6 -4 40.2 3.96
 1 6 4 40.37 4.74
 1 6 4 42.37 4.29
 1 6 5 19.78 3.71
 1 6 5 20.63 3.45
 1 6 5 19.24 1.9
 1 6 5 21.13 1.52
 -1 6 -5 23.81 3.38
 -1 6 -6 2.69 1.56
 1 6 6 -0.27 1.73
 -1 6 -7 64.01 6.04
 1 6 7 59.8 6.83
 -1 6 -8 32.77 4.78
 1 6 8 25.84 5.04
 -1 7 9 44.46 4.92
 1 7 -8 88.05 7.48
 -1 7 8 84.2 6.47
 1 7 -7 87.43 7.02
 -1 7 7 77.85 6.14
 -1 7 6 100.62 6.91
 1 7 -6 104.17 7.17
 -1 7 5 234.85 10.66
 -1 7 5 230.84 8.05
 1 7 -5 235.03 10.37
 -1 7 4 155.38 8.1
 -1 7 4 159.68 8.35
 1 7 -4 161.33 7.83
 -1 7 4 142.46 5.88
 -1 7 3 677.18 19.49
 1 7 -3 670.34 18.2
 -1 7 3 723.06 18.76
 -1 7 2 528.88 15.64
 1 7 -2 517.65 14.17
 -1 7 2 506.1 14.65
 -1 7 2 525.91 11.86
 -1 7 2 508.35 15.14
 -1 7 1 474.21 13.77
 -1 7 1 468.22 14.13
 1 7 -1 442.19 12.84
 1 7 -1 426.73 11.75
 -1 7 0 203.12 8.67
 -1 7 0 195.28 7.56
 1 7 0 193.3 6.21
 1 7 0 212.48 7.38
 1 7 1 536.27 13.32
 -1 7 -1 553.48 15.81
 1 7 1 528.74 17.18
 1 7 1 545.94 11.16
 -1 7 -1 553.87 13.82
 1 7 1 556.39 11.48
 -1 7 -2 763.97 20.31
 1 7 2 743.27 21.88
 1 7 2 742.71 18.08
 -1 7 -2 774.8 16.94
 1 7 2 745.09 16.33
 -1 7 -3 156.75 8.06
 1 7 3 163.07 7.65
 1 7 3 173.44 5.32
 1 7 3 165.94 9.26
 -1 7 -4 175.44 8.89
 1 7 4 175.25 5.27
 1 7 4 182.21 9.14
 1 7 4 183.17 10.32
 1 7 5 140.11 9.69
 -1 7 -5 141.6 8.34
 1 7 5 145.46 9.03
 -1 7 -6 52.59 5.3
 1 7 6 57.97 6.3
 -1 7 -7 99.67 7.69
 1 7 7 94.57 8.72
 1 7 8 22.24 4.71
 -1 8 9 12.03 2.99
 -1 8 9 21.15 4.46
 1 8 -8 9.1 3.25
 -1 8 8 10.65 2.82
 -1 8 7 15.16 3.09
 1 8 -7 15.36 3.33
 -1 8 6 16.58 3.07
 1 8 -6 22.16 3.55
 1 8 -5 31.5 3.99
 -1 8 5 27.43 3.97
 -1 8 5 29.4 2.67
 -1 8 5 28.84 3.85
 -1 8 4 75.41 5.94
 -1 8 4 72.7 5.63
 1 8 -4 73.32 5.47
 -1 8 3 25.51 3.29
 1 8 -3 26.88 3.07
 -1 8 3 27.74 3.23
 -1 8 2 4.74 1.5
 1 8 -2 5.15 1.43
 -1 8 2 5.57 1.72
 -1 8 2 5.64 0.92
 -1 8 2 6.02 1.67
 1 8 -1 -0.18 0.78
 1 8 -1 0.24 0.77
 -1 8 1 -0.07 0.99
 -1 8 1 1.24 1.07
 -1 8 0 27.76 2.87
 -1 8 0 24.56 2.83
 1 8 0 25.16 2.09
 1 8 0 25 2.53
 1 8 1 2.06 0.59
 -1 8 -1 2.93 1.14
 1 8 1 2.43 0.9
 1 8 1 3.67 1.8
 -1 8 -1 1.11 1.05
 1 8 1 1.89 0.55
 1 8 2 4.59 1.09
 1 8 2 3.02 1.42
 1 8 2 4.02 1.02
 -1 8 -2 2.92 1.57
 -1 8 -3 27.32 3.43
 1 8 3 28.59 4.05
 1 8 3 23.29 2.86
 1 8 3 28.22 2.14
 1 8 4 137.7 7.93
 1 8 4 131.46 9.14
 -1 8 -4 133.17 7.95
 1 8 5 49.39 5.33
 1 8 5 46.76 5.87
 -1 8 -5 44.14 4.82
 1 8 6 33.22 4.82
 -1 8 -6 30.62 4.36
 1 8 7 25.87 4.87
 -1 8 -7 25.55 4.4
 1 8 8 32.96 5.74
 -1 9 9 37.7 5.76
 -1 9 8 15.53 3.33
 -1 9 8 13.6 3.56
 1 9 -7 49.15 5.6
 -1 9 7 39.6 4.83
 -1 9 6 111.08 7.75
 1 9 -6 111.4 7.87
 -1 9 5 181.54 9.82
 -1 9 5 168.21 9.94
 1 9 -5 173.55 9.34
 -1 9 4 69.4 5.85
 -1 9 4 92.41 6.68
 1 9 -4 90.45 6.24
 -1 9 3 80.92 6.01
 1 9 -3 87.46 5.74
 -1 9 3 80.95 5.88
 -1 9 2 205.66 9.46
 -1 9 2 221.62 6.78
 1 9 -2 187.03 8.17
 -1 9 2 211.29 9.52
 1 9 -1 285.87 9.67
 -1 9 1 310.71 11.87
 -1 9 1 305.86 11.25
 1 9 0 183.71 7.86
 1 9 0 181.66 6.53
 -1 9 0 175.71 8.19
 -1 9 0 200.45 8.21
 1 9 1 236.07 8.6
 -1 9 -1 232.02 9.92
 1 9 1 229.36 11.47
 1 9 1 222.81 6.36
 1 9 1 248.75 6.68
 -1 9 -1 246.84 8.92
 1 9 2 178.17 6.94
 -1 9 -2 176.29 8.78
 1 9 2 197.25 10.75
 1 9 3 34.86 2.62
 -1 9 -3 32.54 3.92
 1 9 3 34.8 3.44
 1 9 3 30.75 4.4
 -1 9 -4 166.73 9.28
 1 9 4 159.32 8.63
 1 9 4 170.64 10.71
 1 9 5 72.66 6.54
 1 9 5 68.94 7.4
 -1 9 -5 74.18 6.28
 1 9 6 42.33 6.2
 1 9 6 45.4 5.67
 -1 9 -6 49.09 5.5
 1 9 7 16.73 3.92
 -1 9 -7 21.56 4.08
 1 9 8 13.53 3.93
 -1 10 8 2.21 2.27
 -1 10 7 2.28 2.38
 -1 10 7 3.63 2.3
 1 10 -7 -0.15 1.82
 -1 10 6 6.95 2.89
 1 10 -6 1.56 2.17
 -1 10 6 7.45 2.31
 -1 10 5 4.49 2.4
 1 10 -5 1.93 1.8
 -1 10 5 0.95 1.65
 -1 10 5 2.65 1.74
 -1 10 4 0.41 1.61
 -1 10 4 0.91 0.95
 1 10 -4 1.35 1.45
 -1 10 4 1.7 1.79
 1 10 -3 15.44 2.8
 -1 10 3 16.11 2.8
 -1 10 3 16.56 1.86
 -1 10 3 13.5 2.9
 1 10 -2 4.27 1.68
 -1 10 2 4.75 1.91
 -1 10 2 3.57 0.54
 -1 10 2 6 1.96
 -1 10 2 4.57 1.07
 -1 10 1 38.51 4
 -1 10 1 34.62 3.6
 -1 10 1 43.93 4.57
 1 10 -1 38.81 3.36
 -1 10 0 46.34 4.1
 -1 10 0 45.93 4.21
 1 10 0 45.97 3.22
 1 10 0 50.38 5.47
 -1 10 -1 61.8 4.48
 -1 10 -1 55.43 4.77
 1 10 1 62.63 4.35
 1 10 1 62.62 3.05
 1 10 1 52.69 2.74
 1 10 1 56.55 5.8
 1 10 2 1.59 1.72
 1 10 2 -0.29 1.01
 -1 10 -2 1.63 1.6
 1 10 3 1.01 1.79
 1 10 3 0.05 1
 -1 10 -3 -0.37 1.32
 1 10 4 2.64 2.35
 1 10 4 1.32 1.18
 -1 10 -4 0.49 1.66
 1 10 5 14.96 3.56
 1 10 5 15.33 3.31
 -1 10 -6 4.07 2.49
 1 10 6 -2.19 2.65
 1 10 6 2.51 2.16
 1 10 7 -3.06 3.03
 -1 11 7 23.96 4.22
 -1 11 6 52.45 5.8
 1 11 -6 56.3 5.9
 1 11 -5 16.05 3.36
 -1 11 5 18.7 3.71
 -1 11 5 14.99 3.45
 1 11 -4 34.14 4.28
 -1 11 4 31.35 4.51
 -1 11 4 29.68 4.36
 1 11 -3 59.19 5
 -1 11 3 64.54 5.85
 -1 11 3 53.4 5.52
 1 11 -2 94.66 6.09
 -1 11 2 111.98 7.72
 -1 11 2 110.66 7.37
 -1 11 2 109.24 6.43
 -1 11 1 36.48 3.82
 -1 11 1 43.97 4.43
 1 11 -1 37.67 3.4
 -1 11 1 33.2 4.28
 -1 11 0 4.12 1.78
 1 11 0 3.26 1.18
 1 11 0 6.16 2.53
 -1 11 0 0.82 1.11
 -1 11 -1 117.08 7.29
 1 11 1 123.56 9.19
 1 11 1 116.75 4.56
 1 11 1 107.2 4.18
 -1 11 -2 83.67 6.39
 1 11 2 83.4 7.64
 1 11 3 22.01 4.06
 -1 11 -3 34.39 4.31
 1 11 4 12.62 3.6
 -1 11 -4 6.64 2.41
 1 11 5 20.33 4.64
 -1 11 -5 20.96 3.69
 1 11 6 35.98 6.16
 -1 11 -6 25.61 4.4
 -1 12 6 1.75 2.19
 1 12 -6 0 2.19
 -1 12 5 15.83 3.68
 1 12 -5 8.39 2.83
 -1 12 4 4.56 2.2
 -1 12 4 3.57 1.86
 1 12 -4 1.67 1.85
 -1 12 3 1.8 2.12
 -1 12 3 0.73 1.67
 1 12 -3 4.51 2.27
 -1 12 2 17.47 2.66
 -1 12 2 22.18 3.63
 1 12 -2 15.86 2.67
 -1 12 2 20.79 3.66
 -1 12 1 -1.72 1.81
 -1 12 1 0.25 1.23
 -1 12 1 0.07 1.86
 1 12 -1 -0.54 1.09
 1 12 0 7 2.68
 -1 12 0 3.38 1.65
 1 12 0 6.32 1.64
 -1 12 0 5.05 1.86
 1 12 1 1.66 2.12
 -1 12 -1 -0.51 1.3
 1 12 2 2.44 2.15
 -1 12 -2 0.68 1.57
 1 12 3 9.99 3.18
 -1 12 -3 14.4 3.11
 1 12 4 4.42 2.13
 -1 12 -4 8.14 2.72
 1 12 5 5.08 2.73
 -1 12 -5 16.36 3.61
 1 12 6 9.91 4.31
 1 13 -5 32.66 4.7
 -1 13 4 55.5 6.32
 1 13 -4 67.91 6.17
 -1 13 3 66.75 6.76
 1 13 -3 64.24 5.79
 -1 13 3 71.43 6.71
 -1 13 2 63.89 6.2
 1 13 -2 59.27 5.2
 -1 13 2 53.87 5.94
 -1 13 1 72.67 6.4
 -1 13 1 89.78 7.79
 1 13 -1 87.59 5.66
 -1 13 1 82.17 6.1
 -1 13 0 49.62 4.92
 1 13 0 55.23 6.86
 1 13 1 74.17 7.87
 -1 13 -1 66.42 5.85
 1 13 2 55.39 6.97
 -1 13 -2 36.71 4.67
 -1 13 -3 77.44 6.82
 1 13 3 77.99 8.47
 -1 13 -4 14.96 3.39
 1 13 4 28.06 5.53
 1 13 5 43.87 6.74
 1 13 6 3.66 3.18
 1 14 -5 0.39 1.95
 1 14 -4 8.22 2.86
 -1 14 3 14.83 3.71
 1 14 -3 9.95 2.88
 -1 14 2 10.6 3.19
 -1 14 1 6.5 2.89
 1 14 -1 3.48 2.4
 -1 14 0 3.32 1.97
 1 14 0 4.01 3
 -1 14 0 7.61 2.85
 1 14 1 10.23 3.56
 -1 14 -1 13.64 2.95
 1 14 2 27.32 5.3
 -1 14 -2 20.43 3.75
 1 14 3 -0.9 2.72
 -1 14 -3 2.72 2.1
 1 14 4 -0.69 2.34
 -1 14 -4 -3.1 2.6
 1 14 5 -1.16 2.93
 1 15 -1 3.32 3.18
 1 15 0 2.21 2.96
 1 15 1 5 3.18
 1 15 2 4.03 2.73
 -1 15 -2 5.76 2.3
 1 15 3 24.27 5.34
 -1 15 -3 22.14 4.2
 1 15 4 27.09 6.14
 1 16 -1 5.73 3.4
 1 16 0 -3.66 3.37
 1 16 1 0.39 2.54
 1 16 2 10.4 4.27
 -2 -15 3 -0.08 2.22
 2 -15 0 3.04 2.84
 2 -15 1 -1.6 2.18
 2 -15 2 6.83 3.46
 -2 -14 4 27.4 4.98
 -2 -14 3 9.36 3.19
 2 -14 -3 3.78 2.75
 -2 -14 2 21.43 4.02
 -2 -14 2 20.18 4.63
 2 -14 -2 22.51 4.96
 -2 -14 1 20.33 4.65
 2 -14 -1 18.45 4.66
 -2 -14 0 11.2 3.66
 2 -14 0 13.08 3.73
 2 -14 1 9.26 3.13
 -2 -14 -1 12.42 4.02
 -2 -14 -2 5.06 2.71
 2 -14 2 10.49 3.51
 -2 -14 -3 13.34 4.1
 2 -14 3 18.4 4.15
 2 -14 4 7.21 3.36
 -2 -13 5 1.04 2.26
 2 -13 -4 4.64 3.18
 -2 -13 4 -2.32 2.13
 -2 -13 3 -1.36 2.64
 -2 -13 3 -2.5 2.21
 2 -13 -3 4.56 3.43
 -2 -13 2 -0.38 1.62
 2 -13 -2 3.57 2.65
 -2 -13 2 2.84 2.72
 2 -13 -1 0.87 1.96
 -2 -13 1 0 1.71
 -2 -13 1 4.63 2.61
 -2 -13 0 6.95 3
 2 -13 0 5.96 2.89
 -2 -13 -1 5.6 3.08
 2 -13 1 9.61 3.19
 2 -13 2 4.04 2.54
 -2 -13 -2 5.29 2.94
 -2 -13 -3 2.74 2.39
 2 -13 3 5.11 2.61
 -2 -13 -4 1.21 2.44
 2 -13 4 -0.47 2.08
 -2 -13 -5 0.1 2.42
 2 -12 -6 17.5 4.73
 -2 -12 6 24.64 4.96
 -2 -12 5 36.95 5.37
 2 -12 -5 18.73 4.49
 -2 -12 4 40.98 5.48
 2 -12 -4 39.22 5.94
 2 -12 -3 60.67 7.27
 -2 -12 3 59.5 6.1
 -2 -12 2 37 4.57
 -2 -12 2 26.95 4.69
 2 -12 -2 36.92 5.59
 -2 -12 1 25.7 4.69
 -2 -12 1 25.07 3.76
 2 -12 -1 21.69 4.14
 2 -12 0 28.52 4.77
 -2 -12 0 28.54 4.83
 -2 -12 -1 52.67 6.26
 2 -12 1 52.99 6.11
 -2 -12 -2 37.57 5.56
 2 -12 2 34.49 5.18
 -2 -12 -3 25.35 4.77
 2 -12 3 17.47 3.62
 -2 -12 -4 10.78 3.52
 2 -12 4 11.35 3.21
 -2 -12 -5 13.19 3.45
 -2 -12 -6 2.47 2.61
 2 -11 -7 4.66 3.58
 2 -11 -6 -0.36 1.97
 -2 -11 6 -0.43 2.03
 -2 -11 5 10.36 3.06
 2 -11 -5 11.07 3.82
 2 -11 -4 14.31 3.97
 -2 -11 4 14.26 3.27
 2 -11 -3 10.05 2.98
 -2 -11 3 12.31 2.82
 -2 -11 2 26.18 3.63
 2 -11 -2 34.13 5.21
 2 -11 -1 24.72 4.24
 -2 -11 1 28.8 3.81
 -2 -11 1 35.49 5.08
 -2 -11 0 0.99 1.89
 2 -11 0 1.16 1.67
 -2 -11 -1 0.61 1.74
 2 -11 1 0.25 1.68
 -2 -11 -2 1.6 2.32
 2 -11 2 4.34 2.33
 -2 -11 -3 60.17 6.68
 2 -11 3 52.31 5.76
 -2 -11 -4 31.13 5.23
 2 -11 4 29.65 4.57
 2 -11 5 16.18 4.5
 2 -11 5 17.02 3.6
 -2 -11 -5 8.7 2.9
 2 -11 5 15.57 3.69
 -2 -11 -6 25.58 5.25
 -2 -10 7 41.28 5.9
 2 -10 -7 36.71 6.31
 -2 -10 6 102.09 8.58
 2 -10 -6 115.11 10.22
 -2 -10 5 135.78 9.42
 2 -10 -5 147.09 11.14
 2 -10 -4 2.97 2.25
 -2 -10 4 3.86 2.04
 2 -10 -3 69.2 6.97
 -2 -10 3 74.93 6.19
 -2 -10 2 122.66 7.53
 2 -10 -2 152.98 9.93
 -2 -10 1 489.76 15.84
 2 -10 -1 455.22 18.21
 -2 -10 1 500.03 18.86
 2 -10 0 388.19 16.09
 -2 -10 0 440.11 13.75
 -2 -10 0 401.32 16.7
 -2 -10 -1 106.52 8.06
 2 -10 1 109.55 7.82
 -2 -10 -2 44.67 5.35
 2 -10 2 43.24 4.89
 2 -10 3 3.42 1.88
 -2 -10 -3 6.25 2.43
 2 -10 4 91.21 8.61
 2 -10 4 93.6 7.45
 -2 -10 -4 93.78 8.04
 2 -10 5 57.08 7.16
 2 -10 5 53.58 5.86
 2 -10 5 71.04 6.78
 -2 -10 -5 58.48 6.91
 -2 -10 -6 15.02 3.68
 2 -10 6 15.22 4.86
 2 -9 -8 3.78 3.45
 2 -9 -7 2.64 2.29
 -2 -9 7 2.84 2.17
 -2 -9 6 8.37 2.98
 2 -9 -6 6.67 2.94
 -2 -9 5 2.17 1.66
 2 -9 -5 4.7 2.77
 -2 -9 4 2.24 1.7
 -2 -9 4 0.26 0.56
 2 -9 -4 1.38 1.86
 -2 -9 3 64.57 5.44
 2 -9 -3 70.19 6.67
 -2 -9 3 68.87 4.41
 -2 -9 2 11.43 2.34
 2 -9 -2 9.27 2.58
 -2 -9 2 8.48 1.73
 -2 -9 1 46.06 2.68
 -2 -9 1 44.71 3.96
 2 -9 -1 41.66 4.87
 2 -9 0 5.82 2.16
 -2 -9 0 5.15 1.44
 -2 -9 0 7.15 2.41
 -2 -9 0 6.3 1.07
 -2 -9 -1 19.62 3.36
 2 -9 1 18.29 3.14
 2 -9 2 26.31 2.88
 -2 -9 -2 32.86 4.41
 2 -9 2 23.25 3.47
 2 -9 3 42.82 4.58
 -2 -9 -3 43.97 5.16
 2 -9 4 58.18 5.47
 2 -9 4 59.7 5.25
 2 -9 4 59.99 6.73
 2 -9 4 52.47 5.47
 -2 -9 -4 57.03 5.97
 2 -9 5 40.43 4.73
 2 -9 5 48.04 6.47
 2 -9 5 48.38 5.33
 2 -9 5 35.66 4.56
 -2 -9 -5 41.86 5.51
 -2 -9 -6 20.22 4.44
 2 -9 6 20.39 4.67
 2 -9 6 17.7 3.84
 2 -8 -8 38.93 6.38
 -2 -8 8 43.39 5.95
 2 -8 -7 43.49 6.53
 -2 -8 7 42.79 5.74
 2 -8 -6 63.27 7.06
 -2 -8 6 69.59 6.52
 -2 -8 5 129.8 8.39
 2 -8 -5 139.26 10.01
 -2 -8 4 14.19 2.76
 2 -8 -4 10.65 2.89
 2 -8 -3 150.91 9.44
 -2 -8 3 164.2 8.28
 -2 -8 3 153.63 6.46
 -2 -8 2 86.4 5.53
 -2 -8 2 95.2 5.24
 2 -8 -2 97.69 7.16
 -2 -8 1 83.9 4.99
 2 -8 -1 75.72 6.07
 -2 -8 1 78.97 4.25
 -2 -8 1 79.21 3.86
 -2 -8 0 90.55 4.88
 -2 -8 0 92.08 4.18
 -2 -8 0 95.94 6.76
 2 -8 0 76.8 5.94
 2 -8 1 109.9 6.87
 -2 -8 -1 96.46 6.84
 2 -8 2 133.64 7.61
 -2 -8 -2 136.1 8.21
 2 -8 2 129.9 6.36
 2 -8 3 8.25 1.58
 2 -8 3 6.41 1.96
 2 -8 3 7.69 1.95
 2 -8 3 4.57 1.93
 -2 -8 -3 7.27 2.42
 2 -8 4 67.2 5.85
 2 -8 4 65.1 6.74
 2 -8 4 64.09 5.53
 -2 -8 -4 67.91 6.25
 2 -8 4 68.14 5.57
 2 -8 5 46.05 6.23
 2 -8 5 43.92 4.96
 2 -8 5 44.02 5.14
 2 -8 5 47.55 4.85
 -2 -8 -5 39.92 5.31
 2 -8 6 12.6 3.2
 -2 -8 -6 10.22 3
 2 -8 7 18.66 4.42
 2 -8 7 28.74 5.35
 2 -8 8 14.17 4.65
 2 -7 -9 1.35 2.19
 -2 -7 8 9.43 3.15
 2 -7 -8 3.48 3.01
 -2 -7 7 24.56 4.27
 2 -7 -7 17.39 4.16
 -2 -7 6 -1.23 2.27
 2 -7 -6 -5.23 2.95
 -2 -7 5 -0.4 1.64
 2 -7 -5 -1.29 2.25
 2 -7 -5 -0.33 0.91
 -2 -7 4 10.31 2.16
 2 -7 -4 15.2 3.29
 -2 -7 3 46.3 4.07
 -2 -7 3 41.62 3
 2 -7 -3 39.17 4.67
 -2 -7 2 24.56 2.77
 -2 -7 2 22.91 2.38
 2 -7 -2 24.56 3.45
 -2 -7 1 1.82 1.07
 -2 -7 1 0.69 0.76
 2 -7 -1 1.24 1.56
 -2 -7 0 34.57 2.58
 -2 -7 0 37.13 2.78
 -2 -7 0 36.27 2.13
 2 -7 0 29.55 3.46
 -2 -7 0 39.57 4.1
 -2 -7 -1 30.69 3.63
 -2 -7 -1 40.24 2.87
 2 -7 1 37.15 3.69
 2 -7 2 14.53 2.42
 2 -7 2 9.47 1.71
 -2 -7 -2 13.3 2.51
 2 -7 3 103.27 7.67
 2 -7 3 100.92 6.28
 2 -7 3 99.3 6.09
 -2 -7 -3 112.2 7.15
 2 -7 4 13.04 3.13
 -2 -7 -4 11.19 2.68
 2 -7 4 15.03 2.93
 2 -7 4 12.91 2.37
 2 -7 4 14.58 2.88
 -2 -7 -4 16.73 3.44
 2 -7 5 16.78 3.7
 -2 -7 -5 16.06 3.54
 2 -7 5 16.46 3.4
 2 -7 5 16.93 2.92
 -2 -7 -5 13.72 2.96
 2 -7 6 3.16 1.89
 2 -7 6 1.53 2.32
 -2 -7 -6 2.26 1.86
 -2 -7 -6 6.67 3.21
 2 -7 6 1.66 1.87
 -2 -7 -7 32.86 5.71
 2 -7 7 31.15 5.48
 2 -7 7 36.22 5.79
 2 -7 8 21.35 5
 -2 -6 9 50.62 6.33
 2 -6 -9 31.69 5.99
 2 -6 -8 70.01 7.99
 -2 -6 8 62.72 6.66
 -2 -6 8 77.1 6.62
 2 -6 -7 165.39 11.55
 -2 -6 7 155.99 9.71
 2 -6 -7 162.71 7.52
 2 -6 -6 180.1 7.49
 2 -6 -6 206.72 12.1
 -2 -6 6 190.46 10.08
 2 -6 -5 166.51 6.66
 2 -6 -5 166.38 8.02
 2 -6 -5 163.52 10.22
 -2 -6 5 182.59 9.15
 -2 -6 4 277.98 11.08
 2 -6 -4 297.18 13.16
 2 -6 -4 289.08 9.72
 -2 -6 3 560.17 15.95
 2 -6 -3 551.58 18.41
 -2 -6 3 572.4 15.39
 -2 -6 3 557.56 13.82
 2 -6 -2 898.2 24.06
 -2 -6 2 862.01 20
 -2 -6 2 930.61 21.26
 -2 -6 1 228.69 7.71
 -2 -6 1 232.64 6.98
 2 -6 -1 220.73 9.66
 -2 -6 0 283.57 8.1
 -2 -6 0 269.29 6.84
 -2 -6 0 291.1 8.78
 2 -6 0 282.86 10.47
 2 -6 0 285.05 11.01
 2 -6 1 761.2 20.36
 2 -6 1 757.82 18.82
 -2 -6 -1 733.86 15.12
 -2 -6 -1 747.92 20.03
 2 -6 1 679.32 18.68
 -2 -6 -1 732.67 17.37
 2 -6 2 379.85 12.9
 -2 -6 -2 367.35 8.59
 2 -6 2 373.92 11.96
 2 -6 2 365.3 11.4
 -2 -6 -2 389.27 13.05
 2 -6 2 368.47 11.94
 2 -6 3 208.66 9.77
 2 -6 3 208.04 10.56
 2 -6 3 216.77 9.06
 -2 -6 -3 215.02 10.43
 2 -6 3 202.89 9.19
 -2 -6 -3 208.33 9.4
 -2 -6 -3 203.78 5.9
 2 -6 3 203.08 8.42
 -2 -6 -4 88.73 3.86
 2 -6 4 106.06 7.81
 2 -6 4 100.23 5.76
 -2 -6 -4 100.69 5.23
 2 -6 4 87.8 6.61
 -2 -6 -4 87.18 6.31
 2 -6 4 83.95 6.15
 -2 -6 -4 93.02 7.42
 2 -6 5 169.45 9.01
 2 -6 5 167 10.83
 2 -6 5 178.78 10.5
 -2 -6 -5 162.07 10.62
 -2 -6 -5 162.76 9.3
 -2 -6 -6 70.24 7.65
 2 -6 6 69.14 7.37
 2 -6 6 82.31 7.86
 -2 -6 -6 77.18 6.71
 2 -6 6 68.82 5.85
 2 -6 7 33.06 5.38
 2 -6 7 34.93 5.72
 -2 -6 -7 26.23 5.19
 2 -6 8 21.49 4.9
 2 -6 8 13.18 3.88
 -2 -5 9 -4.8 2.61
 2 -5 -8 11.55 2.18
 -2 -5 8 15.38 3.34
 2 -5 -8 18.02 4.07
 -2 -5 8 18.17 3.1
 2 -5 -7 5.87 1.7
 2 -5 -7 10.8 2.92
 -2 -5 7 8.26 2.6
 2 -5 -6 109.89 8.56
 2 -5 -6 122.62 6.15
 -2 -5 6 111.94 7.35
 2 -5 -5 6.38 1.37
 -2 -5 5 6.87 0.94
 -2 -5 5 6.25 1.83
 2 -5 -5 7.64 1.86
 2 -5 -5 8.12 2.45
 -2 -5 4 33.35 3.45
 2 -5 -4 28.92 2.58
 2 -5 -4 37.64 3.06
 2 -5 -4 28.2 3.87
 2 -5 -3 23.83 2.96
 2 -5 -3 18.8 2.92
 -2 -5 3 20.86 2.28
 -2 -5 3 20.65 2.56
 -2 -5 3 21.5 1.96
 -2 -5 2 16.59 2.01
 2 -5 -2 15.69 2.48
 -2 -5 2 15.61 1.75
 2 -5 -2 20.97 2.72
 -2 -5 2 16.36 1.96
 2 -5 -1 86.54 5.42
 -2 -5 1 85.18 4.04
 -2 -5 1 91.33 3.74
 2 -5 -1 95.81 5.61
 2 -5 0 636.84 17.23
 -2 -5 0 590.94 12.18
 -2 -5 0 620.11 13.33
 -2 -5 0 610.48 14.94
 2 -5 0 612.07 16.24
 2 -5 1 147.84 6.45
 -2 -5 -1 155.88 4.21
 2 -5 1 158.82 7.33
 -2 -5 -1 159.41 7.12
 -2 -5 -1 154.58 7.13
 -2 -5 -1 163.78 5.19
 -2 -5 -1 160.54 6.42
 2 -5 1 172.31 7.03
 -2 -5 -1 158.46 6.42
 2 -5 2 29.22 2.65
 -2 -5 -2 30.34 3.08
 2 -5 2 36.8 3.32
 2 -5 2 32.68 3.1
 2 -5 2 33.96 3.66
 -2 -5 -2 33.14 2.94
 -2 -5 -2 28.26 2.05
 -2 -5 -2 32.73 3.57
 2 -5 2 31.36 2.8
 2 -5 3 33.03 3.55
 -2 -5 -3 32.31 2.33
 2 -5 3 30.02 3.77
 2 -5 3 30.06 2.91
 2 -5 3 32.35 3.59
 -2 -5 -3 29.91 3.24
 -2 -5 -3 31.07 3.8
 2 -5 3 32.76 2.89
 2 -5 4 126.15 7.2
 2 -5 4 110.81 7.74
 2 -5 4 111.11 5.54
 -2 -5 -4 116.64 6.87
 -2 -5 -4 102.87 3.71
 2 -5 4 112.15 7.46
 -2 -5 -4 117.56 8.18
 -2 -5 -4 107.96 5.02
 2 -5 5 304.16 12.33
 -2 -5 -5 332.95 15.3
 2 -5 5 323.77 14.8
 -2 -5 -5 320.4 8.9
 2 -5 5 307.14 14.3
 -2 -5 -5 322.98 12.95
 2 -5 6 30.9 3.72
 2 -5 6 33.34 4.9
 2 -5 6 26.69 4.74
 -2 -5 -6 34.19 4.36
 -2 -5 -6 30.44 4.87
 2 -5 7 43.86 6.37
 2 -5 7 38.86 5.72
 -2 -5 -7 49.23 6.65
 2 -5 8 16.36 4.16
 2 -5 8 10.35 3.96
 -2 -4 9 62.64 6.57
 2 -4 -8 63.65 5.25
 2 -4 -8 65.83 7.47
 -2 -4 8 63.23 6.09
 -2 -4 8 71.22 5.8
 -2 -4 7 174.39 9.15
 -2 -4 7 178.81 9.72
 2 -4 -7 175.86 11.5
 2 -4 -7 169.15 8.15
 2 -4 -6 220.68 8.89
 2 -4 -6 249.18 12.86
 -2 -4 6 225.97 10.48
 2 -4 -5 150.15 9.22
 -2 -4 5 146 7.64
 2 -4 -5 155.61 7.6
 2 -4 -5 161.65 6.83
 2 -4 -4 701.61 16.94
 2 -4 -4 700.63 21.02
 -2 -4 4 699.88 18.47
 -2 -4 4 691.48 14.83
 2 -4 -4 678.46 17.04
 2 -4 -4 682.84 19.22
 2 -4 -3 269.47 7.43
 -2 -4 3 268.88 9.24
 2 -4 -3 267.73 8.48
 -2 -4 3 271.77 8.75
 2 -4 -3 255.53 10.02
 2 -4 -3 260.93 10.81
 -2 -4 3 251.56 7.86
 -2 -4 3 260.67 7.72
 -2 -4 2 1150.68 24.54
 2 -4 -2 1181.77 27.1
 2 -4 -2 1125.77 27.11
 -2 -4 2 1191.3 23.87
 -2 -4 2 1118.01 24.53
 2 -4 -1 552.13 15.39
 -2 -4 1 545.2 12.1
 -2 -4 1 546.93 12.75
 2 -4 -1 528.57 14.82
 -2 -4 0 443.12 9.85
 2 -4 0 444.01 13.16
 2 -4 0 442.53 12.25
 -2 -4 0 429.26 10.7
 -2 -4 0 458.73 9.38
 -2 -4 0 442.81 11.92
 -2 -4 -1 680.23 17.32
 -2 -4 -1 648.98 14.64
 2 -4 1 634.1 15.43
 -2 -4 -1 665.4 16.45
 2 -4 1 667.53 17
 -2 -4 -1 651.6 18.5
 -2 -4 -1 669.36 16.35
 2 -4 1 650.43 16.5
 2 -4 2 173.27 6.18
 2 -4 2 172.06 7.87
 2 -4 2 169.9 8.08
 -2 -4 -2 184.5 6.68
 2 -4 2 191.98 7.31
 2 -4 2 165.15 6.86
 2 -4 2 167.07 7.5
 -2 -4 -2 181.3 7.22
 -2 -4 -2 174.28 7.02
 -2 -4 -2 161.67 5.72
 -2 -4 -2 176 3.94
 -2 -4 -2 160.11 7.93
 2 -4 3 610.9 18.49
 -2 -4 -3 616.53 15.57
 2 -4 3 604.96 15.47
 -2 -4 -3 631.83 12.58
 2 -4 3 594.92 17.85
 -2 -4 -3 601.89 16.36
 -2 -4 -3 631.88 19.46
 2 -4 3 594.4 17.46
 -2 -4 -4 114.22 6.31
 -2 -4 -4 111.29 4.21
 2 -4 4 108.34 7.3
 2 -4 4 102.14 4.7
 -2 -4 -4 104.95 4.41
 2 -4 4 101.5 6.36
 2 -4 4 107.78 7.24
 -2 -4 -4 115.9 8.01
 2 -4 5 151.61 8.14
 2 -4 5 153.22 7.06
 2 -4 5 156.08 5.35
 2 -4 5 160.82 9.64
 -2 -4 -5 163.63 5.96
 2 -4 5 167.82 10.26
 -2 -4 -5 155.23 10.24
 -2 -4 -5 152.08 8.08
 -2 -4 -5 153.71 5.25
 -2 -4 -6 87.28 8.19
 2 -4 6 83.93 7.47
 2 -4 6 76.95 5.79
 -2 -4 -6 84.35 6.35
 2 -4 6 84.22 7.78
 -2 -4 -6 89.43 4.8
 2 -4 7 37.9 5.94
 2 -4 7 43.39 5.82
 -2 -4 -7 45.93 6.46
 2 -4 8 20.59 4.42
 2 -4 8 14.06 4.29
 -2 -4 -8 25.07 5.35
 2 -4 9 10.49 3.67
 -2 -3 10 13.82 3.59
 -2 -3 9 3.21 2.27
 2 -3 -9 0.44 1.46
 -2 -3 8 1.2 1.87
 2 -3 -8 -0.68 1.26
 -2 -3 8 1.61 1.4
 2 -3 -7 11.05 2.17
 -2 -3 7 11.8 2.7
 2 -3 -7 7.57 2.77
 -2 -3 7 10.15 2.14
 -2 -3 6 3.63 1.77
 -2 -3 6 5.01 1.83
 2 -3 -6 4.92 1.67
 2 -3 -6 4.38 1.48
 2 -3 -6 2.28 1.55
 2 -3 -5 27.75 3.23
 -2 -3 5 24.95 3.04
 2 -3 -5 23.76 2.96
 2 -3 -5 24.53 2.62
 2 -3 -5 25.31 3.63
 2 -3 -4 4.5 1.72
 -2 -3 4 2.47 0.52
 2 -3 -4 2.47 1.01
 -2 -3 4 2.95 1.34
 2 -3 -4 3.35 0.99
 2 -3 -4 2.27 1.06
 -2 -3 3 2.79 0.74
 2 -3 -3 1.8 0.85
 2 -3 -3 3.54 0.78
 2 -3 -3 4.57 1.43
 2 -3 -3 6.88 1.97
 -2 -3 3 4.92 1.13
 -2 -3 2 40.74 2.76
 2 -3 -2 44.86 3.61
 -2 -3 2 44.52 2.71
 2 -3 -2 36.8 3.33
 -2 -3 2 39.31 2.75
 2 -3 -1 58.6 3.92
 -2 -3 1 58.49 2.75
 -2 -3 1 66.24 3.87
 2 -3 -1 58.92 3.8
 -2 -3 1 56.8 3.59
 -2 -3 0 8.59 1.54
 2 -3 0 10.95 1.67
 -2 -3 0 10.09 1.36
 2 -3 0 12.28 1.47
 -2 -3 0 9.71 1.43
 -2 -3 0 8.05 1.17
 2 -3 0 10.14 1.58
 2 -3 1 27.06 2.79
 -2 -3 -1 29.62 2.34
 2 -3 1 30.21 2.56
 -2 -3 -1 32.62 2.28
 -2 -3 -1 27.67 2.99
 -2 -3 -1 26.7 2.83
 -2 -3 -1 30.33 2.68
 2 -3 1 31.03 2.11
 -2 -3 -1 32.87 2.91
 2 -3 1 30.03 2.68
 2 -3 2 224.5 9.03
 2 -3 2 236.02 9.15
 -2 -3 -2 253.05 7.69
 -2 -3 -2 248.17 10.48
 2 -3 2 242.36 7.87
 -2 -3 -2 230.01 9.49
 -2 -3 -2 241.49 6.05
 2 -3 2 249.06 9.32
 -2 -3 -2 235.49 8.56
 -2 -3 -2 239.62 9.83
 -2 -3 -2 238.06 7.72
 2 -3 2 231.94 6.58
 2 -3 3 41.71 2.75
 -2 -3 -3 46.84 3.04
 -2 -3 -3 39.9 2.25
 2 -3 3 46.4 4.09
 2 -3 3 37.45 3.76
 -2 -3 -3 43.93 3.2
 -2 -3 -3 39.7 4.27
 2 -3 3 39.36 3.68
 -2 -3 -4 11.18 1.93
 2 -3 4 7.05 1.82
 -2 -3 -4 7.28 1.44
 2 -3 4 6.39 2.02
 2 -3 4 7.06 1.04
 -2 -3 -4 9.48 1.35
 2 -3 4 7.58 1.32
 -2 -3 -4 8.14 1.04
 2 -3 4 8.73 2.46
 -2 -3 -4 8.92 2.54
 2 -3 5 23.72 3.2
 2 -3 5 24.16 2.47
 -2 -3 -5 28.26 2.53
 -2 -3 -5 24.93 1.24
 -2 -3 -5 26.35 2.99
 -2 -3 -5 20.1 2.52
 -2 -3 -5 21.08 3.71
 2 -3 5 26.44 4.11
 2 -3 5 21.84 3.49
 -2 -3 -6 7.43 1.94
 2 -3 6 14.03 3.21
 2 -3 6 7.63 2.97
 -2 -3 -6 12.47 3.32
 -2 -3 -6 13.07 2.19
 2 -3 6 8.66 2.02
 -2 -3 -7 42.94 6.23
 2 -3 7 43.64 5.43
 2 -3 7 39.36 5.97
 -2 -3 -7 49.06 4.06
 2 -3 8 13.89 3.45
 2 -3 8 5.8 3.07
 -2 -3 -8 19.32 4.83
 -2 -2 10 28.37 4.58
 2 -2 -10 26.71 4.3
 -2 -2 9 63.52 6.24
 2 -2 -9 76.63 6.44
 -2 -2 8 90.9 6.05
 2 -2 -8 95.99 6.85
 2 -2 -8 91.4 7.36
 -2 -2 8 88.89 6.91
 -2 -2 7 223.78 9.88
 2 -2 -7 245.33 10.32
 -2 -2 7 221.41 10.55
 -2 -2 6 91.44 6.13
 -2 -2 6 85.61 5.76
 2 -2 -6 98.37 5.89
 2 -2 -6 97.69 6.12
 2 -2 -5 149.29 7.36
 -2 -2 5 140.45 7.25
 2 -2 -5 143.48 6.66
 2 -2 -5 152.03 8.91
 -2 -2 4 661.96 16.22
 2 -2 -4 617.67 19.04
 2 -2 -4 619.91 15.86
 2 -2 -4 612.35 17.26
 2 -2 -3 425.62 12.67
 -2 -2 3 404.7 9.63
 -2 -2 3 418.69 11.19
 2 -2 -3 399.13 11.3
 2 -2 -3 411.16 13.51
 -2 -2 2 154.83 5.5
 2 -2 -2 149.42 5.8
 -2 -2 2 155.3 5.44
 2 -2 -2 155 6.64
 2 -2 -2 139.51 6.54
 -2 -2 2 155.84 5.81
 -2 -2 1 265.98 8.53
 -2 -2 1 262.84 6.35
 2 -2 -1 269.83 8.9
 -2 -2 1 281.02 7.29
 -2 -2 1 276.63 7.88
 -2 -2 1 274.6 8.6
 2 -2 -1 271.26 8.53
 -2 -2 0 229.76 8.34
 2 -2 0 236.22 6.8
 2 -2 0 233.58 7.82
 -2 -2 0 225.2 8
 2 -2 0 231.91 8.18
 -2 -2 0 245.97 7.29
 2 -2 0 235.37 8.01
 2 -2 1 501.76 14.07
 2 -2 1 503.79 13.62
 2 -2 1 523.53 12.89
 -2 -2 -1 513.42 14.74
 -2 -2 -1 508.76 12.49
 -2 -2 -1 516.46 14.72
 -2 -2 -1 543.81 13.96
 2 -2 1 515.91 13.95
 2 -2 1 522.17 10.88
 -2 -2 -1 521.72 11.81
 2 -2 2 294.74 9.95
 2 -2 2 303.16 10.59
 2 -2 2 312.35 10.54
 -2 -2 -2 300.93 7.94
 -2 -2 -2 311.28 6.51
 -2 -2 -2 287.73 10.88
 -2 -2 -2 302.55 9.99
 -2 -2 -2 294.88 8.07
 2 -2 2 299.05 6.71
 2 -2 2 305.92 8.37
 -2 -2 -2 295.7 11.38
 2 -2 3 267.47 7.22
 -2 -2 -3 286.15 11.26
 2 -2 3 266.64 10.07
 -2 -2 -3 281.58 7.94
 2 -2 3 276.89 10.42
 2 -2 3 291.66 7.35
 -2 -2 -3 288.3 8.53
 2 -2 3 284.68 11.19
 -2 -2 -3 287.13 8.16
 -2 -2 -4 80.17 4.15
 -2 -2 -4 85.98 2.51
 2 -2 4 78.69 3.84
 2 -2 4 76.65 5.56
 -2 -2 -4 75.72 2.35
 2 -2 4 84.6 6.52
 -2 -2 -4 83.56 4.1
 2 -2 4 75.88 5.23
 -2 -2 -4 88.34 4.74
 2 -2 5 52.63 4.53
 -2 -2 -5 46.53 3.6
 2 -2 5 50.63 4.79
 -2 -2 -5 59.03 3.77
 -2 -2 -5 49.69 3.89
 2 -2 5 54.43 5.75
 2 -2 5 53.08 3.54
 2 -2 6 176.37 9.99
 -2 -2 -6 187.18 7.79
 2 -2 6 181.59 11.66
 -2 -2 -6 163.67 11.27
 2 -2 7 51.04 5.69
 2 -2 7 51.06 6.85
 -2 -2 -7 52.99 4.43
 -2 -2 -7 51.2 6.78
 2 -2 8 21.89 4.07
 2 -2 8 15.06 4.22
 -2 -2 -8 18.57 4.69
 2 -1 -10 15.96 3.59
 -2 -1 10 9.5 3.02
 2 -1 -10 10.99 3.17
 -2 -1 9 5.59 2.43
 2 -1 -9 5.25 2.43
 -2 -1 8 1.16 1.25
 -2 -1 8 0.02 1.38
 2 -1 -8 2.85 1.93
 -2 -1 7 49.95 4.32
 -2 -1 7 56.53 5
 2 -1 -7 55.59 5.17
 -2 -1 6 9.43 1.8
 2 -1 -6 10.9 2.17
 2 -1 -5 36.58 3.28
 2 -1 -5 35.77 3.34
 -2 -1 5 33.16 3.32
 2 -1 -5 28.99 3.11
 -2 -1 4 7.34 1.38
 -2 -1 4 4.53 1.6
 2 -1 -4 6.45 1.53
 -2 -1 4 4.83 1.4
 2 -1 -4 3 1.15
 -2 -1 3 107.43 5.54
 2 -1 -3 107.33 5.56
 -2 -1 3 105.2 4.71
 2 -1 -3 109.37 4.95
 2 -1 -3 104.33 6.03
 -2 -1 2 27.79 2.59
 2 -1 -2 24.98 2.56
 -2 -1 2 25.31 2.04
 -2 -1 2 25.66 1.97
 2 -1 -2 27.65 2.59
 2 -1 -2 27.02 2.31
 -2 -1 1 3058.29 58.04
 2 -1 -1 3209 58.33
 2 -1 -1 3110.64 58.68
 2 -1 -1 3159.02 55.16
 -2 -1 1 3161.28 57.67
 2 -1 -1 3058.5 57.94
 -2 -1 1 3064.04 58.19
 2 -1 -1 3183.6 58.8
 2 -1 0 1112.66 24.34
 2 -1 0 1178.66 24.83
 -2 -1 0 1132.13 23.36
 2 -1 0 1172.56 23.11
 -2 -1 0 1110.78 24.61
 -2 -1 0 1130.14 23.92
 2 -1 0 1140.75 23.87
 -2 -1 0 1108.47 24.84
 2 -1 0 1142.17 22.07
 2 -1 1 82.85 3.69
 2 -1 1 69.67 4.28
 -2 -1 -1 70.12 4.36
 2 -1 1 72.57 4.3
 -2 -1 -1 76.21 4.28
 -2 -1 -1 74.73 2.61
 -2 -1 -1 72.62 4.57
 -2 -1 -2 17.26 2.43
 2 -1 2 19.17 2.39
 -2 -1 -2 14.76 1.34
 2 -1 2 15.78 1.4
 -2 -1 -2 16.12 1.21
 -2 -1 -2 16.03 2.4
 -2 -1 -2 13.43 1.52
 -2 -1 -2 18.86 2.25
 2 -1 2 15.74 2.18
 -2 -1 -2 15.74 1.31
 2 -1 3 177.99 7.83
 -2 -1 -3 157.66 4.22
 -2 -1 -3 169.16 5.36
 2 -1 3 164.24 7.03
 -2 -1 -3 172.03 5.35
 2 -1 3 173.53 4.73
 -2 -1 -3 167.09 8.07
 2 -1 3 174.16 8.47
 -2 -1 -3 165.34 6.12
 -2 -1 -3 170.91 5.47
 2 -1 4 192.99 8.7
 -2 -1 -4 206.33 9.56
 2 -1 4 206.07 8.79
 -2 -1 -4 215.72 6.75
 -2 -1 -4 213.26 7.53
 2 -1 4 211.8 6.7
 2 -1 4 224.7 10.83
 2 -1 5 166.92 8.58
 2 -1 5 158.82 6.52
 -2 -1 -5 171.9 7.15
 2 -1 5 187.63 10.77
 2 -1 6 164.11 9.12
 -2 -1 -6 164.36 7.58
 2 -1 6 185.2 11.81
 -2 -1 -7 41.74 4.08
 2 -1 7 37.16 5.83
 2 -1 7 40.12 4.79
 2 -1 8 5.83 2.25
 -2 -1 -8 10.08 2.54
 2 -1 8 11.56 4.24
 -2 -1 -8 9.66 3.37
 -2 0 10 31.19 4.51
 -2 0 9 89.99 7.09
 2 0 -9 98.61 7.86
 -2 0 8 136.56 7.18
 2 0 -8 132.12 8.6
 2 0 -8 129.48 8.47
 -2 0 8 135.33 8.15
 -2 0 7 458.53 14.77
 2 0 -7 497.18 16.92
 2 0 -7 486.72 16.44
 2 0 -6 360.61 12.62
 -2 0 6 359.31 12.33
 2 0 -6 365.33 13.29
 -2 0 5 827.54 21.41
 2 0 -5 848.59 20.62
 2 0 -5 875.61 21.97
 2 0 -5 862.3 16.91
 2 0 -4 166.06 5.12
 -2 0 4 176.69 7.5
 -2 0 4 172.47 8.66
 2 0 -4 165.17 6.89
 -2 0 4 165.39 6.56
 2 0 -4 155.85 5.85
 -2 0 3 211.06 8.02
 -2 0 3 218.06 8.99
 2 0 -3 213.32 6.32
 -2 0 3 204.36 7.1
 2 0 -3 214.12 7.38
 -2 0 3 202.49 6.02
 2 0 -2 636.84 15.97
 2 0 -2 625.35 14.41
 -2 0 2 603.03 15.79
 2 0 -2 628.91 15.26
 -2 0 2 624.74 14.64
 -2 0 2 662.23 16.48
 2 0 -2 638.21 14.96
 2 0 -1 9999 167.68
 -2 0 1 9437.54 167.31
 2 0 -1 9565.11 167.05
 2 0 -1 9317.8 167.76
 2 0 -1 9427.94 165.64
 -2 0 1 9575.71 167.17
 -2 0 1 9846.67 167.14
 -2 0 1 9464.06 167.66
 -2 0 1 9403.49 167.82
 2 0 -1 9649.83 167.74
 2 0 0 6204.59 105.74
 -2 0 0 5816.01 105.18
 2 0 0 5769.42 103.77
 -2 0 0 5828.35 103.94
 -2 0 0 5837.72 103.69
 -2 0 0 5748.03 102.13
 2 0 0 5899.58 105.11
 -2 0 0 5882.49 104.02
 -2 0 0 5858.31 105.07
 2 0 0 5907.88 104.2
 2 0 1 539.9 14.73
 -2 0 -1 562.58 14.89
 -2 0 -1 544.09 14.49
 2 0 1 544.18 14.54
 -2 0 -1 547.84 14.46
 -2 0 -1 564.47 12.57
 2 0 1 558.59 14.69
 -2 0 -1 511.73 14.03
 -2 0 -1 540.35 12.52
 -2 0 -2 147.18 7.28
 -2 0 -2 142.01 4.3
 -2 0 -2 136.6 4.92
 -2 0 -2 133.57 6.62
 -2 0 -2 136.73 5.61
 2 0 2 140.64 6.56
 2 0 2 147.33 6.93
 -2 0 -2 135.42 6.23
 -2 0 -3 220.92 9.08
 2 0 3 215.49 7.64
 -2 0 -3 212.06 5.72
 -2 0 -3 215.26 6.74
 -2 0 -3 207.93 7.5
 -2 0 -3 218.96 10.19
 2 0 3 210.49 9.47
 2 0 3 211.7 8.73
 2 0 3 202.74 5.53
 -2 0 -4 675.49 14.68
 -2 0 -4 657.82 19.15
 2 0 4 697.46 17.92
 -2 0 -4 706.81 16.33
 -2 0 -4 684.69 17.19
 2 0 4 723.39 21.81
 2 0 4 671.57 15.52
 2 0 5 99.13 5.09
 2 0 5 106.86 6.25
 -2 0 -5 106.1 5.75
 2 0 5 105.62 8.16
 2 0 6 296.91 12.22
 -2 0 -6 324.29 11.59
 2 0 6 303.65 15.67
 -2 0 -7 93.07 6.27
 2 0 7 102.65 9.6
 2 0 7 92.29 6.9
 -2 0 -8 57.23 5.38
 2 0 8 51.47 7.32
 -2 0 -9 20.46 3.71
 -2 1 11 2.89 2.89
 2 1 -10 8.29 2.86
 -2 1 10 7.43 2.39
 2 1 -9 -3.19 2.49
 2 1 -9 -0.17 1.67
 -2 1 9 2.95 1.98
 -2 1 8 -1.06 1.47
 2 1 -8 0.76 1.28
 2 1 -8 -1.09 1.82
 2 1 -7 51.23 4.68
 -2 1 7 49.58 4.11
 2 1 -7 58.01 5.35
 2 1 -6 6.77 1.86
 -2 1 6 6.13 1.66
 2 1 -6 10.07 1.97
 2 1 -5 35.53 3.01
 -2 1 5 29.96 3.22
 2 1 -5 30.44 3.29
 2 1 -4 4.09 0.95
 -2 1 4 7.83 1.68
 2 1 -4 5.36 0.62
 -2 1 4 6.35 1.32
 -2 1 4 4.98 1.54
 2 1 -4 4.47 1.19
 -2 1 3 108.93 5.49
 -2 1 3 107.84 4.38
 2 1 -3 115.33 5.24
 2 1 -3 106.97 3.83
 -2 1 3 108.51 4.91
 -2 1 3 116.09 6.31
 2 1 -2 27.63 2.04
 -2 1 2 23.47 2.45
 -2 1 2 25.42 2.45
 2 1 -2 24.69 2.23
 -2 1 2 22.6 2
 2 1 -2 28.05 2.3
 -2 1 1 3064.87 57.43
 -2 1 1 3138.2 58.37
 2 1 -1 3155.3 57.9
 -2 1 1 3144.51 57.58
 2 1 -1 3068.05 57.5
 2 1 -1 3174.62 58.23
 2 1 0 1194.46 25.14
 -2 1 0 1114.15 24.85
 -2 1 0 1141.31 23.85
 -2 1 0 1191.96 23.24
 2 1 0 1138.48 24.47
 -2 1 0 1150.32 22.17
 -2 1 0 1187.11 24.97
 -2 1 -1 78.19 4.49
 -2 1 -1 74.13 3.73
 -2 1 -1 67.63 3.24
 -2 1 -1 75.87 4.24
 2 1 1 67.24 4.32
 2 1 1 70.85 4.32
 2 1 1 67.49 4.21
 -2 1 -1 70.67 4.11
 -2 1 -1 76.82 4.26
 -2 1 -2 16.05 2.15
 2 1 2 17.79 2.35
 -2 1 -2 17.42 2.24
 -2 1 -2 16.12 1.3
 2 1 2 17.38 2.55
 -2 1 -2 18.41 2.53
 -2 1 -2 16.23 1.76
 -2 1 -2 17.05 2.03
 2 1 2 16.92 2.33
 -2 1 -2 16.52 2.09
 -2 1 -3 159.53 7.62
 -2 1 -3 178.71 4.51
 -2 1 -3 172.71 6.41
 -2 1 -3 159.91 6.87
 -2 1 -3 169.59 9.01
 2 1 3 158.21 5.87
 2 1 3 175.71 8.6
 2 1 3 165.71 5.31
 2 1 4 211.6 7.69
 -2 1 -4 218.51 7.76
 -2 1 -4 192.3 8.8
 -2 1 -4 196.86 8.08
 2 1 4 235 11.09
 -2 1 -4 201.59 5.34
 2 1 4 202.29 7.02
 2 1 5 165.17 10.28
 2 1 5 167.82 7.51
 -2 1 -5 161.4 7.58
 2 1 5 158.89 6.87
 2 1 6 156.08 7.96
 -2 1 -6 167.63 8.19
 2 1 6 157.05 10.95
 2 1 7 37.22 4.06
 2 1 7 37.64 5.97
 -2 1 -7 35.75 4.13
 -2 1 -8 12.75 2.95
 2 1 8 10.5 4.06
 -2 1 -9 28.45 4.3
 2 2 -10 20.72 4.26
 -2 2 10 29.96 4.4
 -2 2 9 59.33 5.61
 2 2 -9 62.86 6.43
 -2 2 9 61.06 5.2
 2 2 -9 67.76 6.4
 2 2 -8 91.96 6.95
 -2 2 8 98.03 6.63
 -2 2 8 88.18 5.8
 2 2 -8 104.84 7.73
 -2 2 7 228.06 9.59
 2 2 -7 257.09 11.56
 2 2 -7 226.09 10.27
 -2 2 6 101.52 5.99
 2 2 -6 105.31 6.76
 2 2 -6 89.68 5.6
 -2 2 5 136.4 6.78
 2 2 -5 154.56 7.59
 2 2 -5 136.91 6.12
 -2 2 4 649 17.18
 -2 2 4 663.47 16.72
 2 2 -4 625.77 16.96
 -2 2 4 639.9 15.96
 -2 2 4 615.17 18.92
 2 2 -4 597.16 15.12
 -2 2 3 404.31 12.31
 -2 2 3 422.59 10.92
 2 2 -3 412.48 11.71
 2 2 -3 413.84 8.67
 -2 2 3 432.25 13.67
 -2 2 3 421.21 11.17
 2 2 -3 402.34 10.98
 -2 2 2 154.32 6.47
 2 2 -2 149.3 5.77
 -2 2 2 161.46 6.8
 -2 2 2 146.62 5.62
 2 2 -2 149.7 5.76
 -2 2 1 277.75 8.78
 -2 2 1 262.91 8.06
 -2 2 1 277.86 8.38
 2 2 -1 271.29 8.11
 -2 2 0 240.51 7.57
 -2 2 0 225.7 6.55
 2 2 0 228.64 8.2
 2 2 0 229.63 7.1
 -2 2 0 238.81 6.52
 -2 2 -1 512.53 13.35
 -2 2 -1 510.5 12.19
 2 2 1 502.7 14.5
 2 2 1 494.12 13.71
 -2 2 -1 506.63 13.53
 -2 2 -1 512.7 13.58
 -2 2 -2 304.37 9.86
 -2 2 -2 303.37 9.46
 -2 2 -2 311.49 10.13
 -2 2 -2 301.45 7.67
 2 2 2 284.07 11.07
 2 2 2 290.9 10.59
 -2 2 -2 290.71 9.77
 2 2 3 274.49 8.29
 -2 2 -3 293.39 9.46
 -2 2 -3 292.52 10.17
 2 2 3 294.79 12.26
 2 2 3 291.72 11.48
 -2 2 -3 271.19 9.85
 2 2 4 78.71 4.39
 2 2 4 83.95 4.1
 -2 2 -4 86.47 4.92
 -2 2 -4 85.07 5.25
 2 2 4 90.05 6.77
 -2 2 -4 78.67 5.27
 2 2 5 54.62 3.78
 2 2 5 52.3 3.98
 -2 2 -5 43.05 3.94
 2 2 5 47.05 5.47
 -2 2 -5 52.7 4.6
 -2 2 -6 182 9.4
 2 2 6 175.25 7.93
 -2 2 -6 182.1 8.88
 2 2 6 191.65 12.22
 -2 2 -7 47.81 5.07
 -2 2 -7 48.18 4.82
 2 2 7 52.99 7.01
 2 2 8 20.48 5.03
 -2 2 -8 21.64 3.7
 -2 2 -9 24.48 4.12
 -2 3 10 13.99 3.17
 -2 3 9 0.01 1.23
 2 3 -9 1.58 2.05
 2 3 -9 -3.7 2.69
 2 3 -8 2.44 2.25
 -2 3 8 -0.1 1.12
 -2 3 8 -0.03 1.86
 2 3 -8 2.61 1.94
 -2 3 7 11.06 2.3
 2 3 -7 8.48 2.26
 -2 3 6 2.66 1.37
 2 3 -6 5.23 2
 2 3 -5 22.37 2.12
 2 3 -5 20.29 2.75
 -2 3 5 26.41 3.05
 -2 3 5 24.04 3.05
 2 3 -4 2.55 0.71
 -2 3 4 2.08 0.9
 -2 3 4 4.6 1.39
 2 3 -4 3.69 1.46
 -2 3 4 2.39 0.86
 2 3 -3 2.26 0.79
 -2 3 3 4.15 1.5
 2 3 -3 3.13 1.11
 -2 3 3 2.58 1.29
 -2 3 3 3.13 0.84
 -2 3 2 38.31 3.22
 -2 3 2 44.24 3.52
 2 3 -2 38.58 2.88
 2 3 -2 35.96 2.62
 -2 3 2 40.81 2.76
 2 3 -2 40.99 1.62
 -2 3 1 60.53 3.68
 -2 3 1 61.59 3.9
 2 3 -1 60.1 3.41
 -2 3 0 8.95 1.45
 2 3 0 9.17 1.65
 2 3 0 11.13 1.39
 -2 3 0 11.62 1.36
 -2 3 -1 32.5 2.87
 -2 3 -1 24.66 2.17
 2 3 1 33.67 3.36
 -2 3 -1 33.77 2.74
 2 3 1 27.7 2.64
 -2 3 -2 233.96 9.08
 2 3 2 231.23 10.04
 -2 3 -2 250.89 7.23
 -2 3 -2 256.97 9
 2 3 2 247.39 9.62
 -2 3 -2 236.46 8.54
 -2 3 -2 246.42 8.61
 2 3 3 42.25 3.13
 -2 3 -3 45.12 3.62
 -2 3 -3 42.78 3.74
 2 3 3 51.54 4.9
 2 3 3 48.28 4.41
 -2 3 -3 42.16 3.44
 2 3 4 8.73 1.73
 2 3 4 8.46 1.08
 -2 3 -4 9.18 1.85
 2 3 4 8.52 2.19
 -2 3 -4 7.25 1.8
 2 3 5 26.59 2.33
 2 3 5 21.86 2.76
 -2 3 -5 25.36 3.11
 2 3 5 21.72 4.02
 -2 3 -5 22.2 3.15
 -2 3 -6 13.02 2.45
 2 3 6 11.61 1.87
 2 3 6 7.51 3.05
 -2 3 -6 9.15 2.33
 2 3 7 44.45 6.6
 -2 3 -7 43.27 4.7
 -2 3 -8 18.04 3.42
 2 3 8 8.68 3.63
 -2 4 9 61.26 5.53
 2 4 -9 66.81 6.73
 -2 4 8 60.26 5.54
 -2 4 8 74.9 5.37
 2 4 -8 71.24 6.57
 -2 4 7 185.33 8.72
 2 4 -7 175.11 9.7
 -2 4 7 169.16 9.28
 2 4 -6 229.89 7.16
 2 4 -6 246.76 10.9
 -2 4 6 246.6 10.2
 -2 4 5 166.99 8.05
 2 4 -5 171.39 8.34
 2 4 -5 156.71 5.43
 -2 4 4 692.46 18.94
 2 4 -4 687.15 18.47
 -2 4 4 710.74 19.06
 -2 4 3 268.81 9.99
 2 4 -3 259.62 9
 -2 4 3 266.56 8.01
 -2 4 3 264.99 10.78
 -2 4 2 1120.45 26.26
 -2 4 2 1140.75 24.16
 2 4 -2 1175.8 24.23
 -2 4 2 1173.68 26.98
 -2 4 1 564.43 14.94
 2 4 -1 523.94 13.41
 2 4 -1 559.28 12.91
 -2 4 1 554.57 14.71
 2 4 0 438.29 13.76
 -2 4 0 436.49 11.69
 2 4 0 444.44 12.35
 -2 4 0 448.3 12.36
 -2 4 0 458.05 11.97
 -2 4 0 417.83 12.88
 2 4 0 431.29 11.07
 -2 4 -1 655.29 17.6
 2 4 1 652.57 18.82
 -2 4 -1 711.4 16.34
 -2 4 -1 661.44 16.34
 -2 4 -2 169.95 7.58
 -2 4 -2 175.14 7.95
 2 4 2 174.73 8.78
 2 4 2 180.35 8
 -2 4 -2 175.08 7.05
 -2 4 -3 620.05 11.57
 -2 4 -3 596.61 15.88
 -2 4 -3 600.3 17.57
 2 4 3 599.37 19.53
 2 4 3 606.26 18.54
 2 4 4 108.14 8
 -2 4 -4 96.57 5.48
 2 4 4 115.91 7.82
 -2 4 -4 107.42 6.5
 2 4 4 98.27 5.89
 -2 4 -5 161.31 8.53
 -2 4 -5 154.91 7.42
 2 4 5 173.58 10.65
 2 4 5 150.62 8.02
 -2 4 -6 83.81 6.29
 -2 4 -6 73.53 5.24
 -2 4 -7 42.8 4.8
 2 4 7 34.23 5.77
 -2 4 -8 25.06 4.03
 2 4 8 21.53 4.92
 -2 5 9 -2.32 2.15
 2 5 -9 -0.41 1.95
 -2 5 8 9.37 2.5
 -2 5 8 13.63 2.53
 2 5 -8 17.15 3.52
 2 5 -7 7.27 2.55
 -2 5 7 6.65 2.36
 -2 5 7 3.62 1.51
 -2 5 6 115.94 6.91
 2 5 -6 129.98 7.94
 -2 5 6 121.08 7.85
 -2 5 5 4.97 1.64
 2 5 -5 8 2.18
 -2 5 4 33.81 3.57
 2 5 -4 30.99 3.28
 -2 5 3 19.63 2.68
 2 5 -3 24.11 2.67
 -2 5 3 18.94 1.9
 2 5 -2 16.51 1.87
 -2 5 2 18.29 1.9
 -2 5 2 16.32 2.36
 -2 5 2 18.99 1.44
 -2 5 2 18.31 2.53
 -2 5 1 92.71 5.36
 2 5 -1 91.12 3.78
 2 5 -1 96.67 4.58
 2 5 -1 89.31 4.33
 -2 5 1 104.77 5.65
 2 5 0 635.93 14.6
 -2 5 0 611.42 17.24
 -2 5 0 633.59 16.22
 -2 5 0 632.36 16.35
 2 5 0 605.75 17.94
 -2 5 0 596.52 14.84
 2 5 0 629.71 16.35
 -2 5 -1 155.79 7.45
 2 5 1 157.49 8.24
 -2 5 -1 167.38 6.71
 -2 5 -1 155.3 6.21
 2 5 1 158.99 7.69
 2 5 2 30.8 3.19
 -2 5 -2 29.04 2.18
 2 5 2 30.79 3.7
 -2 5 -2 30.28 3.39
 -2 5 -2 38.59 3.11
 -2 5 -3 33.27 1.58
 2 5 3 31.26 4.16
 -2 5 -3 30.65 3.51
 2 5 3 32.4 3.79
 -2 5 -4 110.76 6.93
 2 5 4 113.77 6.88
 2 5 4 117.63 7.9
 2 5 4 109.32 8.19
 -2 5 -5 320.78 12.92
 2 5 5 337.46 15.34
 -2 5 -5 297.41 10.48
 2 5 6 41.95 5.79
 -2 5 -6 28.72 3.9
 -2 5 -7 46.16 5.29
 2 5 7 45.73 6.66
 2 5 8 12.21 4.26
 -2 5 -8 11.08 2.9
 -2 6 9 32.28 4.31
 2 6 -9 42.55 5.78
 -2 6 8 68.34 6.04
 -2 6 8 64.47 5.43
 2 6 -8 65.49 6.56
 -2 6 7 142.09 8.92
 -2 6 7 154.39 8.37
 2 6 -7 169.41 9.84
 -2 6 6 174.66 9.87
 -2 6 6 189.33 9.29
 2 6 -6 191.54 9.83
 -2 6 5 165.2 9.39
 -2 6 5 187.01 9.04
 2 6 -5 163.4 8.52
 -2 6 4 290.07 12.51
 -2 6 4 300.25 11.6
 2 6 -4 276.17 10.71
 -2 6 3 572.98 18.46
 -2 6 3 575.67 17.22
 -2 6 3 602.75 14.38
 2 6 -3 573.27 15.84
 -2 6 3 572.71 14.12
 -2 6 2 856.92 19.95
 -2 6 2 876.58 22.63
 -2 6 2 934.58 18.98
 2 6 -2 876.78 20.11
 -2 6 1 243.49 9.9
 -2 6 1 235.11 9.35
 2 6 -1 229.31 6.87
 2 6 -1 225.78 7.83
 2 6 -1 224.54 8.12
 -2 6 1 231.29 9.53
 -2 6 0 302.75 10.66
 2 6 0 293.89 11.75
 -2 6 0 315.09 10.51
 -2 6 0 284.78 8.55
 2 6 0 283.79 10.2
 2 6 0 267.45 8.31
 -2 6 0 285.65 10.22
 -2 6 -1 704.88 17.63
 2 6 1 723.36 21.44
 -2 6 -1 736.97 17.11
 2 6 1 778.02 20.83
 -2 6 -2 394.47 10.02
 -2 6 -2 386.99 13.65
 2 6 2 398.95 15.07
 2 6 2 354.5 12.4
 -2 6 -3 207.04 5.58
 -2 6 -3 214.15 9.86
 2 6 3 218.79 11.22
 2 6 3 199.44 9.57
 2 6 4 102.92 8.21
 -2 6 -4 103.73 6.97
 2 6 4 96.79 7.27
 2 6 5 174.51 11.47
 -2 6 -5 188.6 9.93
 2 6 5 167.35 10.64
 -2 6 -6 73.48 6.44
 2 6 6 89.61 8.5
 -2 6 -7 37.59 5
 2 6 7 29.57 5.5
 2 6 8 13.14 4.21
 -2 7 9 1.78 1.74
 2 7 -8 2 2.61
 -2 7 8 2.59 1.77
 -2 7 8 6.07 2.1
 -2 7 7 16.44 3.15
 -2 7 7 20.19 3.31
 2 7 -7 17.98 3.64
 -2 7 6 -0.55 1.46
 -2 7 6 0.19 1.27
 2 7 -6 0.73 1.7
 2 7 -5 3.5 2.28
 -2 7 5 1.83 1.69
 -2 7 5 2.21 1.74
 -2 7 4 9.84 2.57
 -2 7 4 12.82 2.62
 2 7 -4 17.43 2.68
 -2 7 3 37.65 4.3
 -2 7 3 46.12 3.34
 -2 7 3 41.93 4.23
 2 7 -3 40.44 3.6
 -2 7 3 43.63 2.97
 -2 7 2 24.21 3.36
 -2 7 2 22.3 2.28
 -2 7 2 32.73 3.7
 -2 7 2 26.06 2.26
 2 7 -2 26.21 2.59
 -2 7 1 -0.23 1.36
 2 7 -1 0.46 0.71
 -2 7 1 1.1 1.24
 2 7 -1 1.12 1.14
 2 7 -1 -0.04 0.64
 -2 7 0 33.54 3.29
 2 7 0 33.35 4.03
 2 7 0 30.57 1.88
 -2 7 0 34.02 2.44
 2 7 0 34.53 2.68
 2 7 0 31.38 3.3
 -2 7 -1 36.84 2.99
 2 7 1 36.08 2.35
 2 7 1 38.05 4.49
 -2 7 -1 30.04 3.5
 -2 7 -1 38.99 2.77
 -2 7 -2 14.13 1.68
 2 7 2 14.28 3.09
 -2 7 -2 14.3 2.63
 2 7 2 13.62 2.17
 -2 7 -3 104.59 6.97
 2 7 3 113.33 8.21
 2 7 3 103.04 6.67
 2 7 4 14.98 3.48
 2 7 4 14.21 2.96
 -2 7 -4 15.62 2.91
 2 7 5 16.92 3.91
 2 7 5 24.13 4.13
 -2 7 -5 17.09 3.29
 2 7 6 0.16 2.32
 -2 7 -6 3.28 2.1
 -2 7 -7 35.91 5.01
 2 7 7 34.08 5.98
 -2 8 9 36.88 4.83
 -2 8 8 39.61 4.98
 2 8 -8 45.62 5.78
 -2 8 7 35.08 4.71
 2 8 -7 46.91 5.55
 -2 8 6 64.84 5.85
 2 8 -6 72.98 6.27
 -2 8 6 59.05 5.8
 -2 8 5 164.02 9.58
 -2 8 5 151.04 8.76
 2 8 -5 149.58 8.58
 -2 8 4 11.5 2.6
 -2 8 4 13.09 2.74
 -2 8 4 15.32 2.35
 2 8 -4 16.32 2.72
 -2 8 3 162.97 9.13
 -2 8 3 167.43 7.08
 -2 8 3 172.23 8.86
 2 8 -3 146.87 7.36
 -2 8 3 155.29 6.11
 -2 8 2 98.89 6.66
 -2 8 2 85.5 4.72
 -2 8 2 87.02 4.86
 -2 8 2 105.58 6.72
 2 8 -2 85.97 4.81
 -2 8 1 81.8 5.69
 2 8 -1 79.82 3.99
 2 8 -1 76.09 4.5
 2 8 -1 86.82 5.43
 -2 8 0 96.32 5.69
 2 8 0 87.01 6.85
 2 8 0 87.14 3.45
 -2 8 0 89.44 3.93
 2 8 0 91.33 4.6
 -2 8 -1 112.84 5.6
 2 8 1 104.3 4.17
 -2 8 -1 108.27 7
 2 8 1 133.48 8.54
 -2 8 -2 136.47 5.65
 -2 8 -2 142.5 8.22
 2 8 2 136.68 9.21
 2 8 3 15.12 3.53
 2 8 3 7.85 2.01
 -2 8 -3 9.81 2.39
 2 8 4 68.2 7.17
 -2 8 -4 60.51 5.74
 2 8 4 67.78 6.09
 2 8 5 35.54 5.49
 2 8 5 40.13 5.18
 -2 8 -5 40.59 5.01
 2 8 6 15.4 3.67
 -2 8 -6 18.39 3.63
 2 8 7 27.03 5.52
 -2 9 8 2.19 2.39
 2 9 -8 2.69 2.56
 -2 9 7 2.32 2.4
 2 9 -7 6.03 2.92
 2 9 -6 6.34 2.73
 -2 9 6 5.16 2.15
 -2 9 5 0.68 2.06
 2 9 -5 6.85 2.58
 -2 9 4 0.01 1.62
 -2 9 4 0.08 1.18
 2 9 -4 2.59 1.67
 -2 9 3 69.34 5.95
 -2 9 3 74.2 4.93
 2 9 -3 70.23 5.09
 -2 9 3 63.97 3.76
 -2 9 2 10.89 1.81
 2 9 -2 8.25 1.85
 -2 9 2 5.06 1.72
 -2 9 2 12 2.07
 -2 9 1 35.14 3.85
 2 9 -1 44.3 3.12
 -2 9 1 44.21 2.5
 2 9 -1 41.78 3.41
 -2 9 0 7.26 1.85
 2 9 0 5.28 2.14
 -2 9 0 7.1 0.99
 2 9 0 5.29 0.97
 2 9 0 6.61 1.34
 2 9 1 16.5 1.6
 -2 9 -1 22.58 2.65
 2 9 1 20.95 3.82
 -2 9 -1 19.65 3.11
 -2 9 -2 25.93 2.56
 2 9 2 24.13 4.4
 -2 9 -2 20.14 3.46
 2 9 3 29.91 4.73
 2 9 3 36.9 3.93
 -2 9 -3 42.24 4.74
 -2 9 -4 61.26 6.02
 2 9 4 62.4 7.13
 2 9 4 48.75 5.16
 2 9 5 40.69 6.04
 2 9 5 48.13 5.74
 -2 9 -5 49.76 5.67
 2 9 6 28.89 5.48
 2 9 6 27.68 5.14
 -2 9 -6 16.81 3.75
 2 9 7 15.89 4.41
 -2 10 7 43.7 5.42
 2 10 -7 52.5 6.17
 -2 10 6 111.98 8.44
 2 10 -6 109.43 8.28
 -2 10 5 141.42 9.38
 2 10 -5 153.9 9.17
 -2 10 4 -0.41 1.68
 -2 10 4 3.81 1.71
 2 10 -4 6.65 2.41
 -2 10 3 64.17 5.92
 -2 10 3 69.32 5.1
 2 10 -3 72.06 5.31
 -2 10 2 153.12 8.63
 -2 10 2 140.53 6.67
 -2 10 2 147.44 7.64
 2 10 -2 153.56 7.17
 -2 10 1 512.22 16.33
 2 10 -1 476.99 13.9
 2 10 -1 467.38 12.89
 -2 10 0 416.27 13.69
 -2 10 0 391.89 14.94
 2 10 0 394.7 17.08
 2 10 0 392.95 9.95
 2 10 0 425.16 12.02
 2 10 1 108.6 4.23
 -2 10 -1 118.45 6.29
 -2 10 -1 104.43 7.27
 2 10 1 94.21 8.11
 -2 10 -2 53.3 3.9
 -2 10 -2 50.37 5.2
 2 10 2 47.88 5.97
 2 10 3 4.19 2.24
 -2 10 -3 9.01 2.82
 2 10 4 102.74 9.31
 -2 10 -4 95.69 7.69
 2 10 4 84.77 6.7
 -2 10 -5 63.91 6.45
 2 10 5 60.21 7.62
 2 10 5 56.99 6.29
 2 10 6 16.6 4.45
 2 10 6 21.42 4.48
 -2 11 7 3.55 2.28
 2 11 -7 0.96 2.31
 -2 11 6 2.08 2.21
 2 11 -6 5.01 3.02
 -2 11 5 7.82 2.84
 2 11 -5 8.91 2.87
 -2 11 4 14.11 3.2
 -2 11 4 16.65 3.03
 2 11 -4 19.52 3.54
 -2 11 3 12.22 2.93
 2 11 -3 14.19 2.73
 -2 11 3 15.8 2.83
 -2 11 2 27.65 4.1
 2 11 -2 33.95 3.44
 -2 11 2 32.44 3.82
 -2 11 1 31.6 4
 -2 11 1 40.02 4.37
 2 11 -1 36.67 3.09
 2 11 -1 32.53 3.25
 -2 11 0 1.54 1.6
 2 11 0 1.09 2.09
 -2 11 0 0.93 1.49
 2 11 0 0.56 0.87
 2 11 0 2.71 0.86
 -2 11 -1 0.29 1.12
 2 11 1 2.06 2.02
 -2 11 -1 -0.41 1.66
 2 11 2 2.07 1.99
 -2 11 -2 -0.18 1.41
 -2 11 -3 59.33 6.06
 2 11 3 51.27 6.54
 2 11 4 33.65 5.82
 -2 11 -4 38.45 5.18
 2 11 5 6.31 3.39
 -2 11 -5 9.79 2.82
 2 11 6 14.44 4.7
 2 12 -6 20.96 4.18
 -2 12 5 31.19 4.82
 2 12 -5 33.27 4.78
 -2 12 4 53.6 5.96
 2 12 -4 42.72 4.88
 -2 12 3 57.18 5.92
 2 12 -3 61.38 5.34
 -2 12 2 40.29 4.84
 -2 12 2 29.4 3.84
 2 12 -2 32.56 3.46
 -2 12 1 22.95 3.45
 2 12 -1 24.71 2.92
 -2 12 1 21.84 3.48
 2 12 -1 23.62 4.43
 -2 12 1 17.66 3.16
 -2 12 0 33.33 3.91
 2 12 0 28.2 5.09
 -2 12 0 27.52 3.93
 -2 12 -1 51.81 4.61
 2 12 1 43.29 6.09
 -2 12 -1 42.88 4.95
 2 12 2 62.24 7.26
 -2 12 -2 45.18 5.32
 2 12 3 22.86 4.78
 -2 12 -3 24.99 4.36
 2 12 4 14.51 4.17
 -2 12 -4 22.55 4.43
 2 12 5 21.87 5.34
 2 13 -6 2.85 2.87
 2 13 -5 4.56 2.68
 -2 13 4 7.47 3.02
 2 13 -4 6.3 2.78
 -2 13 3 -1.31 2.02
 2 13 -3 1.23 1.61
 -2 13 2 0.17 1.57
 -2 13 2 0.71 1.61
 -2 13 1 1.79 2.06
 2 13 -1 -3.8 2.93
 -2 13 1 1.28 1.75
 -2 13 0 11.8 2.74
 2 13 0 8.03 3.07
 -2 13 0 8.06 2.43
 2 13 1 8.13 3.38
 -2 13 -1 6.59 2.75
 2 13 2 3.91 2.71
 -2 13 -2 5.98 2.63
 2 13 3 4.69 3.18
 -2 13 -3 5.53 2.81
 2 13 4 1.6 2.42
 -2 13 -4 3.85 2.48
 2 14 -5 10.22 3.34
 -2 14 3 11.89 3.37
 -2 14 2 19.96 3.9
 -2 14 1 27.56 4.22
 2 14 -1 19.43 4.43
 -2 14 1 20.31 3.84
 -2 14 0 18.69 3.37
 2 14 0 13.26 4.21
 -2 14 0 11.71 3.04
 2 14 1 7.68 3.35
 -2 14 -1 8.84 2.66
 2 14 2 3.84 3.13
 -2 14 -2 10.06 3.37
 2 14 3 11.63 3.99
 -2 14 -3 25.89 4.44
 2 15 -2 8.99 4.06
 -2 15 1 4.76 2.52
 2 15 -1 -0.53 2.77
 2 15 0 5.73 3.46
 2 15 1 0.8 2.62
 -2 15 -1 3.05 2.24
 -2 15 -2 8.09 3.13
 -3 -15 4 15.71 4.23
 -3 -14 4 -1.49 2.26
 -3 -14 3 3.58 2.31
 -3 -14 2 1.85 2.53
 3 -14 -2 0.2 2.31
 -3 -14 1 0.1 2.4
 3 -14 -1 -0.73 2.33
 3 -14 0 9.29 3.2
 -3 -14 0 12.14 4.07
 3 -14 1 10.75 3.38
 -3 -14 -1 9.72 3.48
 -3 -14 -2 18 4.65
 3 -14 2 12.88 3.91
 -3 -13 5 21.57 4.66
 -3 -13 4 53.35 6.29
 3 -13 -4 49.07 7.29
 -3 -13 3 23.61 4.11
 3 -13 -3 28.4 5.19
 -3 -13 2 47.78 5.4
 -3 -13 2 61.13 7.48
 3 -13 -2 43.34 6.39
 -3 -13 1 22.71 4.96
 3 -13 -1 28.27 5.05
 -3 -13 0 38.56 5.98
 3 -13 0 36.82 5.79
 3 -13 1 16.83 4.03
 -3 -13 -1 13.74 3.86
 3 -13 2 31.39 5.19
 -3 -13 -2 25.57 4.99
 -3 -13 -3 23.15 5.07
 3 -13 4 11.7 3.91
 -3 -13 -4 10.98 3.67
 -3 -12 6 -0.14 2.28
 -3 -12 5 -2.94 2.26
 3 -12 -5 0.24 2.45
 -3 -12 4 4.89 2.58
 3 -12 -4 3.98 2.92
 -3 -12 3 15.19 3.33
 3 -12 -3 13.53 3.94
 -3 -12 2 6.4 2.2
 3 -12 -2 9.51 3.11
 -3 -12 1 1.96 2.14
 3 -12 -1 3.01 2.19
 -3 -12 1 0.63 1.54
 -3 -12 0 8.08 2.94
 3 -12 0 14.61 3.75
 3 -12 1 4.03 2.24
 -3 -12 -1 1.86 2.04
 -3 -12 -2 22.01 4.46
 3 -12 2 17.13 4.04
 -3 -12 -3 10.84 3.72
 3 -12 3 7.19 2.83
 3 -12 4 23.27 4.62
 -3 -12 -4 19.03 4.53
 3 -11 -6 12.33 3.98
 -3 -11 6 14.46 3.77
 -3 -11 5 19.13 3.84
 3 -11 -5 19.41 4.39
 -3 -11 4 24.11 4.05
 3 -11 -4 20.88 4.47
 -3 -11 3 50.51 5.33
 -3 -11 3 39.93 4.27
 3 -11 -3 41.56 5.89
 -3 -11 2 57.86 5.23
 3 -11 -2 47.82 6.05
 -3 -11 1 2.84 2.27
 -3 -11 1 -0.65 1.16
 3 -11 -1 0.56 1.69
 -3 -11 0 31.63 4.9
 -3 -11 0 37.37 3.59
 3 -11 0 35.2 4.98
 3 -11 1 54.97 6.09
 -3 -11 -1 67.79 6.97
 -3 -11 -2 14.72 3.45
 3 -11 2 20.37 3.99
 -3 -11 -3 1.43 1.87
 3 -11 3 5.19 2.29
 3 -11 4 2.18 1.99
 -3 -11 -4 1.7 1.99
 -3 -11 -5 26.9 5.05
 -3 -10 7 0.7 2.36
 3 -10 -7 1.92 2.74
 -3 -10 6 2.26 2.19
 3 -10 -6 -0.36 2.54
 -3 -10 5 6.43 2.67
 3 -10 -5 1.17 2.16
 3 -10 -4 14.38 3.91
 -3 -10 4 10.64 2.86
 -3 -10 3 5.03 1.62
 -3 -10 3 5.59 2.02
 3 -10 -3 9.82 3.06
 -3 -10 2 4.4 1.88
 3 -10 -2 0.58 1.66
 -3 -10 1 8.17 1.99
 3 -10 -1 6.91 2.45
 -3 -10 0 104.1 5.66
 3 -10 0 102.38 7.92
 -3 -10 0 96.08 7.83
 -3 -10 -1 24.14 4.13
 3 -10 1 25.63 3.98
 -3 -10 -2 1.07 1.75
 3 -10 2 0.84 1.29
 -3 -10 -3 8.11 2.49
 3 -10 3 12.18 3.06
 3 -10 4 17.06 3.81
 -3 -10 -4 11.81 3.18
 3 -10 5 16.93 3.89
 -3 -10 -5 11.26 3.5
 3 -9 -8 14.05 4.5
 3 -9 -7 48.26 6.94
 -3 -9 7 64.45 6.91
 -3 -9 6 85.45 7.49
 3 -9 -6 75.85 8.34
 -3 -9 5 116.05 8.09
 3 -9 -5 120.58 10.05
 -3 -9 4 13.4 2.08
 -3 -9 4 20.61 3.41
 3 -9 -4 15.86 3.81
 -3 -9 3 121.4 7.28
 -3 -9 3 124.75 6.93
 3 -9 -3 107.13 8.65
 -3 -9 2 160.79 7.96
 -3 -9 2 161.7 7.09
 3 -9 -2 174.01 10.56
 -3 -9 1 59.98 4.45
 -3 -9 1 59.62 3.63
 -3 -9 1 56.71 4.03
 3 -9 -1 65.29 6.27
 -3 -9 0 119.72 5.74
 -3 -9 0 122.54 6.08
 3 -9 0 116.92 8.08
 -3 -9 0 134.62 8.81
 -3 -9 -1 106.71 5.74
 3 -9 1 105.09 7.34
 -3 -9 -1 111.36 7.91
 3 -9 2 53.19 5.17
 -3 -9 -2 47.88 5.31
 3 -9 3 43.79 4.66
 -3 -9 -3 50.21 5.61
 3 -9 3 54.75 6.06
 3 -9 4 39.65 5.25
 -3 -9 -4 39.7 5.19
 3 -9 4 35.22 4.33
 3 -9 5 23.48 4.13
 -3 -9 -5 32.06 4.98
 3 -9 5 19.59 3.9
 3 -9 6 14.34 3.94
 -3 -8 8 4.1 2.96
 3 -8 -8 0.79 2.15
 -3 -8 7 -2.05 2.31
 3 -8 -7 1.16 2.11
 -3 -8 6 -2.4 2.16
 3 -8 -6 -0.22 2.15
 -3 -8 5 15.96 3.04
 3 -8 -5 23.06 4.61
 -3 -8 4 15.19 2.78
 -3 -8 4 14.93 2.21
 3 -8 -4 17.8 3.84
 -3 -8 3 28.38 3.13
 -3 -8 3 28.82 3.36
 3 -8 -3 27.21 4.31
 -3 -8 2 35.22 3.4
 -3 -8 2 31.8 2.85
 3 -8 -2 34.73 4.52
 -3 -8 1 17.5 2.23
 -3 -8 1 16.01 2.2
 -3 -8 1 13.28 1.69
 3 -8 -1 11.52 2.5
 3 -8 0 36.03 4.33
 -3 -8 0 41.09 2.99
 -3 -8 0 37.71 2.13
 -3 -8 0 42.25 3.56
 -3 -8 0 42.27 4.7
 -3 -8 -1 36.41 3.41
 3 -8 1 43.22 4.42
 -3 -8 -1 44.98 4.71
 3 -8 2 8.84 2.23
 -3 -8 -2 7.8 2.31
 3 -8 3 127.04 8.82
 -3 -8 -3 128.1 8.42
 3 -8 3 130.74 7.56
 3 -8 4 55.88 5.66
 -3 -8 -4 58.88 5.8
 3 -8 4 57.39 5
 3 -8 4 63.75 6.34
 -3 -8 -5 47.15 6.43
 3 -8 5 36.6 4.89
 3 -8 5 43.72 5.52
 -3 -8 -5 35.63 4.92
 3 -8 6 32.73 5.38
 -3 -8 -6 38.7 6.22
 3 -8 7 13.78 4.46
 3 -7 -9 39.11 7.1
 -3 -7 8 68.1 6.94
 3 -7 -8 75.41 8.71
 3 -7 -7 29.71 5.26
 -3 -7 7 31.81 4.53
 -3 -7 6 113.47 7.9
 3 -7 -6 113.64 9.66
 -3 -7 5 147.5 8.43
 3 -7 -5 139.01 10.12
 -3 -7 5 135.58 6.52
 -3 -7 4 151.42 7.32
 -3 -7 4 152.8 8.17
 3 -7 -4 158.17 10.21
 -3 -7 4 168.79 6.99
 -3 -7 3 340.25 11.72
 -3 -7 3 333.96 11.83
 3 -7 -3 334.62 14.56
 -3 -7 2 262.17 9.45
 -3 -7 2 248.99 8.43
 -3 -7 2 264.26 10.8
 3 -7 -2 259.11 12.06
 -3 -7 1 82.81 4.52
 -3 -7 1 89.28 4.06
 -3 -7 1 86.44 5.14
 3 -7 -1 93.66 6.6
 3 -7 0 262.69 10.98
 -3 -7 0 259.67 7.97
 -3 -7 0 261.39 6.68
 -3 -7 0 258.52 9.72
 -3 -7 -1 235.75 10.49
 -3 -7 -1 224.94 6.01
 -3 -7 -1 217.42 8.98
 3 -7 1 241 10.07
 -3 -7 -2 161.37 5.76
 -3 -7 -2 153.1 8.42
 3 -7 2 164.28 7.97
 3 -7 2 141.74 7.57
 3 -7 3 33.58 3.52
 3 -7 3 33.67 4.44
 -3 -7 -3 39.99 4.85
 -3 -7 -3 35.26 4.11
 3 -7 4 102.14 7.72
 -3 -7 -4 115.57 8.79
 3 -7 4 90.76 7.14
 -3 -7 -4 90.28 6.83
 3 -7 4 92.62 5.86
 3 -7 5 35.12 5.09
 -3 -7 -5 42.58 4.91
 3 -7 5 31.36 4.46
 -3 -7 -5 37.19 5.68
 3 -7 6 12.98 3.73
 -3 -7 -6 26.2 5.19
 3 -7 7 6.01 3.24
 3 -7 7 17.05 4.44
 -3 -6 9 1.39 2.26
 3 -6 -9 5.97 3.41
 3 -6 -8 10.17 3.68
 -3 -6 8 14.62 3.64
 -3 -6 8 16.95 3.54
 -3 -6 7 18.03 3.54
 3 -6 -7 21.32 2.91
 3 -6 -7 23.22 4.63
 3 -6 -6 74.09 7.49
 -3 -6 6 70.42 6.11
 3 -6 -6 77.46 5.32
 -3 -6 5 2.45 0.95
 -3 -6 5 2.31 1.67
 3 -6 -5 3.72 1.12
 3 -6 -5 0.57 1.53
 3 -6 -4 15.43 3.09
 -3 -6 4 16.68 2.27
 -3 -6 4 15.44 2.72
 -3 -6 3 9.6 1.99
 -3 -6 3 7.13 1.73
 -3 -6 3 6.13 1.68
 3 -6 -3 8.36 2.44
 -3 -6 2 29.29 2.83
 -3 -6 2 29.19 2.53
 3 -6 -2 30.38 3.76
 -3 -6 2 26.11 3.03
 -3 -6 2 34.08 3.62
 -3 -6 1 9.7 1.48
 3 -6 -1 8.41 2.01
 -3 -6 1 8.38 1.15
 -3 -6 0 52.74 2.93
 -3 -6 0 54.35 2.44
 3 -6 0 53.83 4.4
 -3 -6 0 57.03 4.23
 -3 -6 -1 169.12 4.53
 3 -6 1 173.12 8.36
 3 -6 1 174.56 7.85
 -3 -6 -1 177.7 6.48
 -3 -6 -1 173.06 7.89
 -3 -6 -1 166.45 8.09
 -3 -6 -1 184.54 8.51
 3 -6 2 90.35 6.81
 3 -6 2 99 5.54
 -3 -6 -2 88.62 4.54
 -3 -6 -2 109.18 7.19
 -3 -6 -2 96.06 6.06
 3 -6 2 90.54 5.85
 3 -6 3 74.68 6.34
 3 -6 3 63.47 5.57
 -3 -6 -3 69.75 6.35
 3 -6 3 71.32 4.55
 -3 -6 -3 62.76 5.01
 -3 -6 -3 71.07 4.15
 3 -6 4 10.8 2.74
 -3 -6 -4 12.23 2.46
 3 -6 4 7.34 2.44
 3 -6 4 9.2 1.72
 -3 -6 -5 1.38 1.49
 3 -6 5 -1.09 2.14
 3 -6 5 2.33 1.82
 -3 -6 -5 0.33 1.91
 3 -6 6 60.9 6.13
 3 -6 6 55.41 6.96
 3 -6 6 56.09 7.08
 -3 -6 -6 57.21 7.28
 3 -6 7 26.81 5.48
 3 -6 7 28.27 5.82
 -3 -5 9 17.8 3.99
 -3 -5 8 12.59 3.07
 3 -5 -8 15.52 2.91
 -3 -5 8 11.87 2.89
 3 -5 -8 17.12 4.33
 -3 -5 7 1.26 1.59
 -3 -5 7 0.34 1.4
 3 -5 -7 -0.11 1.34
 3 -5 -7 0.22 1.85
 3 -5 -6 272.74 10.66
 -3 -5 6 276.69 11.98
 3 -5 -6 240.78 10.09
 3 -5 -6 274.94 14.4
 3 -5 -5 261.91 10.06
 -3 -5 5 262.06 10.89
 -3 -5 5 241.07 7.84
 3 -5 -5 248.11 8.6
 3 -5 -5 230.8 12.61
 -3 -5 4 343.1 12.09
 -3 -5 4 353.03 10.9
 3 -5 -4 331.06 8.46
 3 -5 -4 329.35 14.48
 -3 -5 3 62.88 4.32
 -3 -5 3 58.17 4.25
 -3 -5 3 61.81 3.96
 3 -5 -3 66.36 5.71
 -3 -5 3 63.05 4.32
 -3 -5 2 110.56 6.2
 -3 -5 2 98.98 5.81
 -3 -5 2 109.11 5.3
 -3 -5 2 113.46 4.9
 3 -5 -2 114.08 6.97
 -3 -5 1 34.28 2.57
 -3 -5 1 35.45 2.33
 -3 -5 1 29.41 3.26
 3 -5 -1 34.8 3.61
 3 -5 0 34.2 3.7
 -3 -5 0 38.91 2.3
 -3 -5 0 36.41 2.07
 -3 -5 0 41 2.99
 -3 -5 0 36.92 3.44
 -3 -5 0 40.62 3.36
 3 -5 0 38.68 3.45
 3 -5 0 37.26 3.77
 -3 -5 -1 3.93 1.43
 3 -5 1 2.29 1.43
 -3 -5 -1 2.88 0.49
 -3 -5 -1 2.55 1.19
 -3 -5 -1 1.76 1.4
 -3 -5 -1 3.09 1.02
 3 -5 1 1.86 1.18
 -3 -5 -1 5.37 0.71
 3 -5 1 2.91 1.13
 3 -5 1 2.71 1.2
 3 -5 2 254.52 11.46
 -3 -5 -2 246.51 9.49
 3 -5 2 263.39 10.3
 -3 -5 -2 256.5 5.63
 3 -5 2 263.46 8.75
 -3 -5 -2 263.46 11.43
 -3 -5 -2 233.3 8.38
 3 -5 2 239.18 9.95
 3 -5 3 241.25 11.44
 -3 -5 -3 250.03 12.25
 -3 -5 -3 241.26 8.66
 3 -5 3 242.48 9.55
 -3 -5 -3 249.39 5.82
 3 -5 3 241.1 11.23
 -3 -5 -3 246.33 9.73
 3 -5 3 251.04 8.29
 3 -5 4 244.24 11.89
 3 -5 4 252.52 9.23
 -3 -5 -4 260.32 6.76
 3 -5 4 228.39 12.03
 -3 -5 -4 245.36 13.09
 -3 -5 -4 272.39 10.75
 3 -5 4 252.26 8.35
 -3 -5 -5 0.59 1.1
 3 -5 5 1.47 1.83
 3 -5 5 3.66 2.33
 3 -5 5 1.06 1.51
 -3 -5 -5 4.98 2.86
 3 -5 6 2.98 1.88
 3 -5 6 4.47 2.63
 3 -5 6 5.67 2.83
 3 -5 7 3.97 2.46
 3 -5 7 11.16 3.91
 -3 -5 -7 11.57 4.08
 3 -5 8 12.05 3.96
 3 -4 -9 0.05 1.6
 -3 -4 9 1.38 2.3
 3 -4 -8 10.93 2.57
 -3 -4 8 11.13 2.95
 -3 -4 8 12.61 2.78
 3 -4 -7 4.91 1.67
 -3 -4 7 5.41 2.06
 -3 -4 7 8.11 2.56
 3 -4 -7 4.92 2.4
 -3 -4 6 53.95 5.07
 3 -4 -6 49.92 4.37
 3 -4 -6 47.27 4.31
 3 -4 -6 55.49 6.25
 -3 -4 6 52.4 5.32
 -3 -4 5 50.85 2.84
 -3 -4 5 47.9 4.46
 3 -4 -5 52.18 3.69
 3 -4 -5 54.39 4.3
 3 -4 -5 39.89 5.02
 -3 -4 4 13.37 1.82
 3 -4 -4 11.9 2.11
 3 -4 -4 14.96 1.49
 3 -4 -4 13.79 2.96
 -3 -4 3 44.92 3.52
 3 -4 -3 48.83 4.76
 -3 -4 3 48.32 3.42
 -3 -4 3 49.76 3.81
 -3 -4 2 4.89 1.41
 -3 -4 2 5.65 1.68
 3 -4 -2 3.52 2.14
 -3 -4 2 4.07 1.05
 3 -4 -2 4.34 1.51
 -3 -4 1 28.05 3.2
 -3 -4 1 23.74 2.37
 -3 -4 1 25.37 1.99
 -3 -4 1 27.37 3.06
 3 -4 -1 24.84 3.11
 3 -4 -1 25.71 2.82
 -3 -4 0 202.62 7.79
 3 -4 0 175.85 8.41
 -3 -4 0 204.65 8.42
 -3 -4 0 200.72 5.94
 -3 -4 0 207.69 7.51
 3 -4 0 197.68 7.71
 -3 -4 0 177.2 8.6
 3 -4 0 181.38 8.49
 3 -4 1 214.59 9.87
 3 -4 1 212.33 8.97
 3 -4 1 219.74 9.24
 -3 -4 -1 222.32 9.16
 -3 -4 -1 234.2 9.58
 3 -4 1 220 7.56
 -3 -4 -1 211.73 8.02
 -3 -4 -1 214.11 7.89
 -3 -4 -2 264.27 9.09
 3 -4 2 271.39 9.91
 -3 -4 -2 267.18 7.08
 3 -4 2 259.42 11.33
 -3 -4 -2 264.42 11.62
 -3 -4 -2 250.81 8.84
 3 -4 2 255.51 7.76
 3 -4 3 26.99 2.72
 -3 -4 -3 24.11 2.64
 -3 -4 -3 24.29 1.83
 3 -4 3 22.97 3.38
 -3 -4 -3 27.22 2.75
 -3 -4 -3 22.87 3.72
 3 -4 3 26.5 2.01
 3 -4 3 26.84 3.56
 3 -4 4 37 2.91
 3 -4 4 37.82 4.45
 -3 -4 -4 43.7 2.71
 3 -4 4 42.87 5.05
 3 -4 4 41.09 2.47
 -3 -4 -4 46.01 3.83
 -3 -4 -4 37.97 5.14
 3 -4 4 38.97 2.42
 3 -4 5 4.92 2.18
 3 -4 5 3.84 2.02
 -3 -4 -5 3.63 1.51
 3 -4 5 5.06 2.37
 -3 -4 -5 -0.18 1.98
 -3 -4 -5 4.13 1.15
 3 -4 6 56.6 5.7
 3 -4 6 65.06 7.06
 3 -4 6 75.21 8.03
 -3 -4 -6 66.79 7.76
 3 -4 7 34.4 5.48
 3 -4 7 37.11 6.22
 -3 -4 -7 26.4 5.5
 3 -4 8 61.13 7.45
 -3 -3 10 28.79 4.96
 -3 -3 9 66.05 6.58
 3 -3 -9 61.57 6.01
 -3 -3 8 129.13 8.53
 -3 -3 8 131.47 8.72
 3 -3 -8 127.02 8.13
 -3 -3 7 93.08 7.13
 -3 -3 7 90.45 6.77
 3 -3 -7 97.09 6.59
 -3 -3 6 246.2 11.49
 3 -3 -6 230.59 10.18
 3 -3 -6 238.67 10.3
 3 -3 -6 232.96 12.86
 3 -3 -5 197.87 8.04
 3 -3 -5 180.48 10.6
 -3 -3 5 197.13 9.82
 3 -3 -5 209.57 8.93
 -3 -3 4 1030.27 21.98
 3 -3 -4 965.93 24.2
 3 -3 -4 1046.84 21.77
 3 -3 -4 1011.56 28.04
 3 -3 -3 498.13 15.98
 3 -3 -3 485.74 14.26
 -3 -3 3 486.82 13.19
 3 -3 -3 478.81 16.31
 -3 -3 3 490.5 13.63
 -3 -3 3 513.45 14.24
 -3 -3 2 616.52 16.79
 3 -3 -2 610.31 18.02
 3 -3 -2 615.75 17.82
 -3 -3 2 641.07 15.19
 -3 -3 2 619.91 17.01
 -3 -3 1 492.94 15.27
 -3 -3 1 498.79 15.28
 3 -3 -1 531.26 15.76
 -3 -3 1 530.88 13.97
 -3 -3 1 529.19 12.4
 3 -3 -1 510.4 14.58
 3 -3 -1 504.89 15.54
 -3 -3 0 593.69 18.14
 3 -3 0 635.16 18.23
 3 -3 0 646.77 17.65
 -3 -3 0 647.19 17.55
 3 -3 0 624.14 17.78
 -3 -3 0 662.77 16.38
 -3 -3 0 670.16 16.76
 3 -3 0 624.84 15.6
 3 -3 1 382.79 13.54
 3 -3 1 367.57 11.98
 -3 -3 -1 387.65 13.91
 -3 -3 -1 389.88 12.85
 -3 -3 -1 406.71 11.7
 3 -3 1 363.73 12.58
 -3 -3 -1 383.34 10.71
 3 -3 1 387.22 9.88
 3 -3 2 509.92 14.15
 -3 -3 -2 518.28 13.01
 -3 -3 -2 519.43 10.2
 -3 -3 -2 495.31 14.2
 -3 -3 -2 496.22 12.43
 3 -3 2 484.43 16.14
 3 -3 2 539.32 11.06
 3 -3 2 505.65 16.59
 3 -3 3 215.85 10.23
 3 -3 3 192.58 7.24
 -3 -3 -3 207.44 7.59
 -3 -3 -3 208.86 6.78
 3 -3 3 204.78 10.33
 -3 -3 -3 216.89 7.47
 -3 -3 -4 162.47 5.81
 3 -3 4 153.09 5.54
 -3 -3 -4 162.06 6.69
 -3 -3 -4 156.27 6.02
 3 -3 4 157.47 9.78
 3 -3 4 161.36 9.01
 -3 -3 -4 155.53 10.21
 3 -3 5 52.6 5.55
 3 -3 5 59.01 5.62
 -3 -3 -5 57.85 3.81
 3 -3 5 69.57 7.16
 -3 -3 -5 69.9 7.31
 -3 -3 -5 61.58 4.22
 3 -3 6 70.07 6.81
 3 -3 6 63 5.84
 -3 -3 -6 69.01 4.48
 3 -3 6 57.19 7.19
 -3 -3 -6 69.39 7.83
 3 -3 7 29.54 5.73
 -3 -3 -7 21.63 4.99
 -3 -2 10 4.46 2.54
 3 -2 -10 4.72 2.53
 -3 -2 9 13.96 3.3
 3 -2 -9 7.48 2.49
 -3 -2 8 6.67 2.32
 -3 -2 8 3.7 1.69
 3 -2 -8 3.53 1.94
 -3 -2 7 7.06 2.12
 3 -2 -7 7.52 2.21
 -3 -2 6 4.16 1.77
 3 -2 -6 5.53 1.71
 3 -2 -5 0.62 1.08
 -3 -2 5 0.06 1.21
 3 -2 -5 -0.12 1.47
 3 -2 -4 -0.14 1.38
 -3 -2 4 0.82 1.25
 3 -2 -4 0.6 0.95
 -3 -2 3 115.8 5.38
 3 -2 -3 119.9 6.89
 3 -2 -3 119.46 6.11
 -3 -2 3 125.23 7.01
 3 -2 -3 119.92 7.12
 -3 -2 3 117.67 5.52
 -3 -2 2 190.5 7.65
 3 -2 -2 190.1 8.49
 3 -2 -2 185.53 7.96
 3 -2 -2 192.69 8.34
 3 -2 -2 185.96 4.64
 -3 -2 2 207.87 7.66
 -3 -2 2 186.77 6.87
 -3 -2 2 185.03 4.44
 3 -2 -2 180.12 8.18
 -3 -2 2 202.59 8.21
 -3 -2 1 96.68 5.64
 3 -2 -1 91.82 5.54
 3 -2 -1 92.91 5.53
 -3 -2 1 85.83 5.35
 -3 -2 1 96.52 5.01
 3 -2 -1 91.71 4.99
 3 -2 -1 97.22 5.76
 -3 -2 0 15.5 2.43
 3 -2 0 19.26 2.52
 -3 -2 0 13.21 2.29
 3 -2 0 15.27 2.36
 -3 -2 0 12.22 1.94
 3 -2 0 14.43 2.11
 -3 -2 0 14.15 2.14
 3 -2 0 18.13 1.8
 -3 -2 0 18.19 2.19
 3 -2 1 19.31 2.62
 -3 -2 -1 20.34 3.01
 3 -2 1 22.14 2.94
 3 -2 1 24.88 1.49
 -3 -2 -1 22.82 2.45
 -3 -2 -1 21.92 2.93
 3 -2 1 19.8 2.28
 -3 -2 -1 25.49 2.91
 3 -2 2 491 13.34
 -3 -2 -2 512.24 11.37
 -3 -2 -2 496.9 13.53
 3 -2 2 502.41 16.28
 3 -2 2 501.82 16.13
 -3 -2 -2 516.08 11.72
 3 -2 3 86.57 4.12
 3 -2 3 82.62 6.1
 -3 -2 -3 94.78 4.53
 -3 -2 -3 87.57 3.42
 -3 -2 -3 96.4 4.36
 -3 -2 -3 93.84 4.64
 3 -2 3 96.34 6.88
 -3 -2 -3 90.22 3.86
 -3 -2 -4 146.71 4.44
 -3 -2 -4 149.49 6.02
 3 -2 4 143.28 8.39
 -3 -2 -4 143.93 6.2
 -3 -2 -4 153.83 5.63
 3 -2 4 142.17 9.42
 3 -2 5 139.19 8.58
 3 -2 5 159.33 9.24
 -3 -2 -5 153.43 6.81
 3 -2 5 160.47 10.99
 -3 -2 -6 60.09 4.42
 3 -2 6 67.74 7.84
 3 -2 7 56.97 6.35
 3 -2 7 61.86 8.23
 -3 -2 -7 55.8 7.38
 3 -1 -11 28.8 4.96
 -3 -1 10 28.1 4.61
 3 -1 -10 33.32 5.06
 -3 -1 9 34.56 4.67
 3 -1 -9 32.21 4.62
 -3 -1 9 35.5 4.3
 -3 -1 8 102.92 7.17
 3 -1 -8 108.5 7.9
 3 -1 -7 240.22 7.48
 -3 -1 7 251.96 11.42
 3 -1 -7 247.42 11.34
 3 -1 -6 144.57 5.97
 -3 -1 6 155.72 8.57
 3 -1 -6 139.37 7.86
 -3 -1 5 115.19 7.13
 3 -1 -5 109.95 5.29
 3 -1 -5 111.73 6.51
 3 -1 -4 531.18 16.49
 -3 -1 4 512.19 16.3
 3 -1 -4 505.97 13.94
 3 -1 -4 505.55 15.1
 3 -1 -3 202.3 7.88
 -3 -1 3 194.45 7.15
 3 -1 -3 201.13 8.97
 -3 -1 3 197.54 7.6
 -3 -1 3 200.05 8.89
 3 -1 -3 198.58 8.13
 -3 -1 2 265.33 10.12
 -3 -1 2 249.57 8.98
 3 -1 -2 262.43 9.28
 3 -1 -2 252.39 7
 3 -1 -2 247.52 9.85
 -3 -1 2 266.81 9.1
 3 -1 -2 259.72 9.48
 3 -1 -2 263.75 9.97
 -3 -1 2 253.28 9.44
 -3 -1 1 533.03 15.25
 3 -1 -1 527.87 15.29
 -3 -1 1 550.23 15.3
 3 -1 -1 510.92 15.17
 3 -1 -1 506.63 12.46
 -3 -1 1 539.69 14.39
 3 -1 -1 512.01 15.15
 -3 -1 1 542.65 15.42
 -3 -1 0 221.53 8.48
 3 -1 0 222.9 9.03
 3 -1 0 233.75 9.43
 -3 -1 0 245.94 8.55
 3 -1 0 228.22 8.01
 -3 -1 0 222.69 8.49
 -3 -1 0 210.25 8.69
 3 -1 0 223.31 8.59
 -3 -1 0 228.93 9.47
 -3 -1 0 222.47 9.26
 -3 -1 -1 293.92 9.49
 3 -1 1 299.72 11.35
 -3 -1 -1 285.8 11.41
 3 -1 1 286.98 9.46
 -3 -1 -1 283.65 10.95
 -3 -1 -1 294.56 10.86
 -3 -1 -1 295.67 11.31
 3 -1 2 265.65 11.11
 -3 -1 -2 272.5 8.56
 -3 -1 -2 280.62 8.09
 3 -1 2 297.33 11.65
 -3 -1 -2 281.95 6.14
 -3 -1 -3 145.1 5.05
 -3 -1 -3 147.29 5.32
 -3 -1 -3 154.38 6.63
 3 -1 3 138.37 7.94
 3 -1 3 145.63 8.59
 3 -1 4 53.58 5.05
 -3 -1 -4 56.45 3.26
 -3 -1 -4 55.61 3.29
 -3 -1 -4 62.13 4.19
 3 -1 4 60.89 6.07
 3 -1 5 37.37 4.42
 -3 -1 -5 39.44 3.49
 3 -1 5 42.46 5.86
 3 -1 6 141.81 8.83
 -3 -1 -6 124.33 6.93
 3 -1 6 144.45 11.53
 3 -1 7 -1.16 3.32
 -3 -1 -7 8.59 2.36
 -3 0 10 1.86 2.18
 3 0 -10 4.45 2.79
 -3 0 9 -0.18 1.57
 -3 0 9 0.33 1.33
 -3 0 8 79.27 6.25
 3 0 -8 84.96 6.94
 3 0 -7 18.66 3.25
 -3 0 7 21.16 3.3
 3 0 -6 4.76 0.96
 3 0 -6 6.4 2.03
 -3 0 6 5.52 1.94
 -3 0 5 203.34 9.61
 3 0 -5 201.85 6.88
 3 0 -5 197.52 8.93
 -3 0 4 39.99 4
 3 0 -4 39.09 3.63
 -3 0 4 47.4 2.71
 3 0 -4 42.69 3.06
 3 0 -3 15.24 2.29
 3 0 -3 17.16 2.12
 3 0 -3 14.58 2.16
 -3 0 3 20.66 2.39
 -3 0 3 13.88 2.27
 -3 0 3 13.55 2.4
 3 0 -2 56.58 3.99
 -3 0 2 56.03 3.83
 3 0 -2 56.86 3.94
 -3 0 2 48.93 3.61
 -3 0 2 54.74 4.08
 -3 0 2 49.61 4
 3 0 -2 60.27 4.31
 -3 0 1 288.52 9.58
 -3 0 1 278.62 10.01
 -3 0 1 266.52 9.94
 3 0 -1 280.31 10.19
 3 0 -1 305.94 10.59
 3 0 -1 278.35 8.69
 -3 0 1 292.83 9.28
 -3 0 1 301.84 10.57
 -3 0 0 510.13 15.16
 -3 0 0 478.56 13.62
 3 0 0 509.82 15.29
 -3 0 0 474.52 13.7
 3 0 0 488.05 13.72
 -3 0 0 511.76 13.66
 -3 0 0 484.91 14.53
 -3 0 0 502.06 11.81
 3 0 0 496.77 14.9
 -3 0 0 515.51 15.06
 -3 0 -1 63.93 4.93
 -3 0 -1 59.15 3.68
 3 0 1 60.08 4.5
 -3 0 -1 66.98 4.69
 -3 0 -1 61.62 4.59
 -3 0 -1 52.91 4.47
 3 0 1 59.06 4.73
 -3 0 -2 60.89 3.33
 -3 0 -2 54.04 3.37
 -3 0 -2 59.11 4.96
 3 0 2 49.32 4.54
 3 0 2 53.28 4.69
 -3 0 -2 52.93 4.65
 3 0 3 25.73 3.44
 -3 0 -3 22.71 2.22
 -3 0 -3 22.68 1.71
 -3 0 -3 24.87 2.83
 3 0 3 25.75 3.74
 -3 0 -3 26.29 3.73
 -3 0 -4 53.71 2.89
 -3 0 -4 47.79 3.36
 -3 0 -4 50.93 4.04
 3 0 4 59.78 5.43
 3 0 4 57.8 6.03
 -3 0 -5 205.86 7.98
 -3 0 -5 203.62 8.87
 3 0 5 223.22 13.11
 3 0 6 3.14 2.43
 -3 0 -6 1.61 1.6
 3 0 7 12.14 3.89
 -3 0 -7 22.84 3.35
 -3 0 -8 25.45 3.81
 -3 1 10 29.53 4.52
 3 1 -10 33.89 5.37
 3 1 -9 33.99 4.87
 -3 1 9 32.64 4.09
 -3 1 8 94.26 6.76
 3 1 -8 100.8 7.76
 3 1 -8 98.77 6.55
 -3 1 7 231.49 10.75
 3 1 -7 245.48 11.7
 -3 1 6 154.15 8.43
 3 1 -6 142.13 8.1
 3 1 -5 110.41 4.26
 -3 1 5 119.95 7.1
 3 1 -5 112.45 6.66
 -3 1 4 526.99 16.17
 3 1 -4 479.2 12.83
 3 1 -4 511.81 15.18
 -3 1 4 528.47 13.03
 3 1 -4 507.16 14.99
 3 1 -3 204.14 7.51
 -3 1 3 190.55 8.69
 3 1 -3 194.84 8.2
 -3 1 3 202.22 7.77
 -3 1 3 194.9 9.13
 3 1 -3 212.79 8.43
 3 1 -2 256.87 9.13
 -3 1 2 248 9.62
 3 1 -2 264.23 9.6
 -3 1 2 255.23 9.55
 -3 1 2 252.63 9.02
 3 1 -2 258.44 9.24
 -3 1 1 503.16 14.16
 -3 1 1 506.31 14.76
 3 1 -1 522.96 14.32
 3 1 -1 552.11 15.3
 3 1 -1 520.74 14.1
 -3 1 1 533.45 13.75
 3 1 -1 529.03 15.23
 3 1 0 225.3 9.33
 -3 1 0 218.75 9.18
 -3 1 0 234.5 8.43
 3 1 0 233.86 8.84
 -3 1 0 233.94 7.94
 -3 1 0 226.57 9
 -3 1 0 228.43 6.67
 -3 1 0 253.95 9.63
 3 1 1 278.57 11.06
 -3 1 -1 294.02 11.24
 -3 1 -1 291.8 9.56
 -3 1 -1 277.48 8.99
 3 1 1 284.47 11
 -3 1 -1 294.26 10.44
 -3 1 -1 303.55 10.95
 -3 1 -1 299.77 11.01
 3 1 2 286.39 11.43
 -3 1 -2 289.3 9.39
 -3 1 -2 273.85 8.25
 3 1 2 275.5 11.67
 -3 1 -2 272.74 11.18
 3 1 2 270.02 11.3
 -3 1 -2 274.99 11.08
 -3 1 -3 146.88 6.38
 -3 1 -3 147.39 4.74
 -3 1 -3 148.32 7.22
 3 1 3 136.06 8.37
 -3 1 -3 136.53 7.88
 -3 1 -4 56.94 2.66
 -3 1 -4 60.91 4.08
 -3 1 -4 58.6 4.56
 -3 1 -4 56.81 5.23
 3 1 4 63.05 6.23
 -3 1 -5 37.29 3.86
 3 1 5 44.04 5.88
 -3 1 -5 35.71 4.49
 -3 1 -6 141.94 7.95
 3 1 6 134.76 11.18
 -3 1 -6 139.83 9.42
 -3 1 -7 3.79 2.13
 -3 1 -7 8.34 2.57
 3 1 7 5.14 3.32
 -3 1 -8 16.99 3.24
 -3 2 10 1.05 2.06
 3 2 -10 7.73 3.38
 -3 2 9 6.23 2.18
 -3 2 8 6.02 2.08
 3 2 -8 9.44 2.12
 3 2 -7 10.56 1.94
 -3 2 7 4.72 1.67
 3 2 -6 4.63 1.53
 3 2 -6 8.56 2.57
 3 2 -6 6.23 1.23
 -3 2 6 3.04 1.42
 3 2 -5 -0.03 0.83
 3 2 -5 1.48 1.53
 -3 2 5 0.32 0.75
 -3 2 5 1.77 1.34
 3 2 -4 0.88 0.83
 -3 2 4 3.53 1.06
 3 2 -4 3.4 1.6
 -3 2 4 1.53 1.13
 3 2 -3 120.38 5.42
 -3 2 3 124.85 6.77
 -3 2 3 113.55 5.72
 3 2 -3 123.24 6.3
 -3 2 3 119.77 6.89
 3 2 -3 116.5 5.95
 3 2 -2 194.09 7.62
 -3 2 2 193.29 8.36
 3 2 -2 201.14 8.1
 -3 2 2 175.99 7.82
 3 2 -2 196.57 7.81
 -3 2 2 188.73 7.66
 3 2 -1 93 4.98
 -3 2 1 88.68 5.19
 -3 2 1 88.43 4.97
 3 2 -1 88.05 5.16
 -3 2 1 86.83 3.35
 3 2 -1 85.49 5.21
 -3 2 1 89.11 4.64
 3 2 0 17.78 2.5
 -3 2 0 17.46 2.49
 -3 2 0 16.47 1.84
 3 2 0 17.11 2.38
 -3 2 0 15.44 2.22
 -3 2 0 16.43 1.59
 -3 2 0 15.62 2.05
 -3 2 -1 23.47 2.87
 3 2 1 23.14 3.1
 -3 2 -1 25.1 2.69
 -3 2 -1 23.86 2.36
 -3 2 -1 20.22 2.44
 3 2 1 26.15 3.16
 -3 2 -1 23.17 2.78
 -3 2 -2 514.87 14.53
 -3 2 -2 509.72 12.77
 3 2 2 507.86 17.12
 -3 2 -2 495.2 16.16
 3 2 2 486.19 16.28
 -3 2 -2 524.65 16
 -3 2 -3 91.91 5.26
 -3 2 -3 80.91 5.55
 3 2 3 78.34 6.63
 -3 2 -3 90.63 3.69
 3 2 3 75.15 6.25
 -3 2 -3 90.34 6.13
 -3 2 -4 147.86 8.4
 -3 2 -4 144.1 4.05
 -3 2 -4 156.15 8
 3 2 4 137.82 9.47
 -3 2 -5 151.66 8.18
 -3 2 -5 128.91 8.31
 3 2 5 147.58 10.61
 -3 2 -6 53.9 4.97
 3 2 6 57.16 7.38
 -3 2 -6 58.31 5.9
 -3 2 -7 50.59 5.16
 3 2 7 55.51 7.96
 -3 2 -8 42.31 5.14
 -3 3 9 69.64 6.62
 3 3 -9 59.82 6.68
 -3 3 8 128.04 8.05
 3 3 -8 123.33 8.98
 -3 3 7 84.62 6.41
 3 3 -7 106.05 7.72
 3 3 -7 96.02 5.45
 -3 3 6 233.89 10.74
 3 3 -6 249.69 11.55
 3 3 -6 235.17 7.87
 3 3 -6 239.33 9.33
 -3 3 5 201.53 9.48
 3 3 -5 208.51 9.53
 3 3 -5 189.36 9.19
 -3 3 5 195.38 8.57
 3 3 -5 187.17 5.36
 3 3 -5 185.66 7.82
 -3 3 4 1014.44 26.14
 -3 3 4 1064.44 23.69
 3 3 -4 1010.57 25.1
 3 3 -4 1016.16 23.86
 -3 3 3 498 15.61
 3 3 -3 493.13 14.54
 -3 3 3 466.71 13.68
 3 3 -3 493.46 14.08
 -3 3 3 497.04 16.02
 -3 3 2 635.45 17.76
 -3 3 2 599.72 16.14
 3 3 -2 616.55 16.59
 -3 3 2 615.02 17.2
 3 3 -1 527.27 14.36
 -3 3 1 519.34 14.98
 -3 3 1 498.67 14.38
 -3 3 1 515.97 10.73
 3 3 -1 494.98 15.17
 -3 3 1 500.67 13.88
 -3 3 0 661.54 16.92
 -3 3 0 600.52 14.84
 3 3 0 621.9 18.08
 -3 3 0 617.31 17.13
 -3 3 0 640.57 14.87
 -3 3 -1 367.63 12.47
 -3 3 -1 387.28 12.62
 -3 3 -1 370.07 11.19
 -3 3 -1 354.31 11.73
 3 3 1 368.91 13.56
 -3 3 -1 390.48 12.7
 -3 3 -2 526.33 13.29
 -3 3 -2 516.87 17.01
 3 3 2 503.44 17.51
 3 3 2 483.2 16.4
 -3 3 -2 534.73 16.07
 -3 3 -3 210 9.62
 3 3 3 206.28 11.09
 -3 3 -3 217.09 6.8
 3 3 3 207.8 10.63
 -3 3 -3 201.64 9.42
 -3 3 -4 139.49 3.26
 -3 3 -4 157.86 8.31
 3 3 4 155.18 9.87
 -3 3 -4 157.38 8.39
 -3 3 -5 64.35 5.62
 3 3 5 70.92 7.49
 -3 3 -5 65.92 5.67
 -3 3 -6 60.46 5.53
 3 3 6 73.11 8.31
 -3 3 -6 69.48 6.07
 3 3 7 24.55 5.23
 -3 3 -7 18.46 3.38
 -3 3 -8 5.3 2.65
 -3 4 9 -2.36 2.2
 3 4 -9 -2.45 2.45
 -3 4 8 10.25 2.52
 3 4 -8 11.01 2.96
 -3 4 7 6.56 2
 3 4 -7 7.42 1.65
 -3 4 6 57.67 5.14
 3 4 -6 49.76 5.08
 3 4 -6 51.87 3.31
 3 4 -6 49.03 3.63
 -3 4 5 54.01 4.86
 3 4 -5 47.1 4.49
 3 4 -5 51.7 2.53
 3 4 -5 53.41 3.76
 -3 4 4 15.91 2.83
 3 4 -4 19.28 2.88
 -3 4 4 14.4 1.98
 3 4 -4 16.7 2.49
 -3 4 3 42.37 4.05
 3 4 -3 43.8 3.79
 -3 4 3 43.02 3.5
 -3 4 2 8.28 2.05
 3 4 -2 4.88 1.39
 -3 4 2 5.73 1.45
 -3 4 2 3.93 1.23
 -3 4 1 26.02 2.98
 3 4 -1 26.8 2.72
 -3 4 1 23.84 1.42
 3 4 -1 30.43 3.38
 -3 4 1 25.59 2.67
 3 4 0 188.58 7.44
 -3 4 0 190.18 7.95
 -3 4 0 184.18 6.62
 3 4 0 189.8 9.18
 -3 4 0 195.34 8.23
 -3 4 0 198.87 7.18
 -3 4 -1 224.01 8.34
 3 4 1 208.92 10.07
 -3 4 -1 204.54 8.75
 3 4 2 254.99 11.98
 -3 4 -2 270.63 8.8
 3 4 2 251.05 10.98
 -3 4 -3 26.38 3.21
 3 4 3 20.6 3.54
 -3 4 -3 24.77 3.23
 3 4 3 22.21 3.53
 -3 4 -4 42.98 4.57
 3 4 4 42.88 5.58
 3 4 4 39 5.11
 -3 4 -4 46.13 4.46
 -3 4 -5 2.77 1.56
 3 4 5 5.99 2.83
 -3 4 -5 3.8 1.84
 -3 4 -6 67.88 6.08
 3 4 6 83.28 8.93
 3 4 7 50.78 7.87
 -3 4 -7 38.54 4.98
 -3 5 10 54.85 6.11
 -3 5 9 17.66 3.63
 3 5 -9 30.11 4.95
 -3 5 8 8.45 2.63
 -3 5 8 15.78 3.13
 3 5 -8 13.82 3.33
 -3 5 7 -0.31 1.42
 3 5 -7 1.53 0.86
 3 5 -7 0.8 1.6
 -3 5 6 260.79 11.76
 3 5 -6 256.68 12.09
 -3 5 5 252.1 11.46
 3 5 -5 252.03 11.09
 -3 5 4 358.07 13.4
 3 5 -4 339.24 12.37
 -3 5 4 318.34 10.53
 3 5 -4 345.33 12.19
 -3 5 3 58.39 4.92
 3 5 -3 66.63 4.73
 3 5 -3 56.41 4.1
 3 5 -3 61.33 2.65
 -3 5 3 65.05 4.38
 -3 5 2 101.46 5.62
 -3 5 2 103.31 6.48
 3 5 -2 107.98 5.94
 -3 5 2 112.17 6.64
 -3 5 1 30.15 3.32
 3 5 -1 33.29 3.82
 3 5 -1 33.21 3.06
 -3 5 1 30.43 3.11
 3 5 0 32.26 2.86
 -3 5 0 37.77 3.52
 3 5 0 36.92 4.14
 -3 5 0 35.05 3.32
 -3 5 0 38.83 3.25
 -3 5 -1 2.61 1.12
 3 5 1 1.48 1.32
 -3 5 -1 2.74 1.22
 -3 5 -2 241.07 10.97
 3 5 2 259.92 12.52
 -3 5 -2 272.49 9.25
 -3 5 -3 231.3 6.84
 -3 5 -3 238.59 10.96
 3 5 3 217.61 11.08
 -3 5 -4 231.76 11.31
 3 5 4 273.97 14.27
 3 5 4 255.96 13.17
 -3 5 -5 2.91 1.36
 3 5 5 2.14 2.14
 -3 5 -5 2.44 1.89
 3 5 6 3.82 2.75
 -3 5 -6 0.82 1.61
 3 5 7 8.47 3.53
 -3 5 -7 3.37 2.17
 -3 6 10 -3.93 2.79
 -3 6 9 2.15 1.97
 3 6 -9 1.39 2.03
 -3 6 8 6.2 2.24
 -3 6 8 6.16 2.16
 -3 6 7 12.91 3.19
 -3 6 7 19.68 3.42
 3 6 -7 20.63 3.85
 -3 6 6 76.35 6.29
 3 6 -6 72.27 6.39
 -3 6 5 1.57 1.47
 3 6 -5 3.65 1.95
 -3 6 4 16.5 2.84
 3 6 -4 20.89 3.15
 -3 6 4 18.85 2.27
 3 6 -4 20.2 2.91
 -3 6 3 4.88 1.68
 -3 6 3 6.4 1.54
 3 6 -3 10.21 2.17
 3 6 -3 6.92 1.12
 3 6 -3 5.49 1.57
 -3 6 2 34.41 3.22
 -3 6 2 27.16 3.48
 3 6 -2 31.39 2.65
 3 6 -2 34.62 3.41
 -3 6 1 10.97 2.32
 3 6 -1 6.83 1.69
 3 6 -1 11.21 2.59
 3 6 -1 8.03 1.58
 -3 6 1 10.39 2.03
 3 6 0 54.91 3.81
 -3 6 0 60.6 4.61
 3 6 0 53.76 5.26
 -3 6 0 53.26 4.07
 -3 6 0 61.74 4.45
 3 6 1 169.91 9.83
 -3 6 -1 171.69 7.73
 -3 6 -1 171.21 7.72
 -3 6 -2 92.97 4.85
 -3 6 -2 92.72 6.74
 3 6 2 90.25 7.36
 -3 6 -3 64.43 3.14
 -3 6 -3 73.1 6.04
 3 6 3 65.5 6.69
 3 6 3 68.67 5.92
 3 6 4 9.25 3.16
 3 6 4 8.16 2.44
 -3 6 -4 14.17 3.07
 3 6 5 0.23 2.27
 3 6 5 2.45 2.44
 -3 6 -5 2.48 2.17
 -3 6 -6 61.69 6.19
 3 6 6 57.89 7.54
 3 6 7 29.88 6.18
 -3 6 -7 23.74 4.37
 -3 7 9 36.68 5.28
 -3 7 8 71.02 7.03
 -3 7 8 78.57 6.6
 3 7 -8 73.86 7.39
 -3 7 7 31.58 4.67
 -3 7 7 38.2 4.64
 3 7 -7 33.67 4.8
 -3 7 6 103.97 8.35
 -3 7 6 101.84 7.5
 3 7 -6 110.01 8.02
 -3 7 5 148.84 9
 3 7 -5 158.24 8.89
 -3 7 4 156.87 9.01
 3 7 -4 163.01 8.35
 -3 7 4 166.59 7.03
 -3 7 3 348.87 13.58
 3 7 -3 328.86 12.11
 3 7 -3 332 11.51
 3 7 -3 339.75 9.83
 -3 7 3 331.83 11.24
 -3 7 2 262.23 10.04
 -3 7 2 262.25 11.25
 -3 7 2 272.85 6.71
 3 7 -2 239.42 8.74
 3 7 -2 270.97 10.3
 3 7 -2 259.84 9.13
 -3 7 1 83.61 6
 3 7 -1 90.59 7.02
 3 7 -1 86.93 5.41
 3 7 -1 88.08 5.34
 3 7 0 265.46 9.16
 3 7 0 276.93 12.84
 -3 7 0 283.07 11.07
 -3 7 0 247.69 9.41
 -3 7 -1 227.83 9.28
 3 7 1 250.19 12.41
 -3 7 -1 251.36 10.03
 -3 7 -1 218.02 8.79
 -3 7 -2 166.38 6.74
 -3 7 -2 147.32 8.81
 3 7 2 165.96 10.45
 -3 7 -3 31.97 2.22
 3 7 3 30.56 4.8
 -3 7 -3 33.23 4.24
 3 7 3 28.38 3.99
 -3 7 -4 95.52 7.45
 3 7 4 94.07 8.82
 3 7 4 85.24 7.44
 -3 7 -5 49.03 5.65
 3 7 5 41.22 6.31
 3 7 5 44.04 6.01
 3 7 6 12.42 3.83
 -3 7 -6 22.67 4.04
 3 7 7 12.99 4.54
 -3 8 9 -0.82 2.31
 -3 8 8 4.55 2.87
 -3 8 8 1.02 2.17
 3 8 -8 -3.66 2.8
 -3 8 7 -0.93 1.97
 -3 8 7 4.13 2.11
 3 8 -7 1.57 2.75
 -3 8 6 -0.03 2.18
 -3 8 6 -0.93 1.87
 3 8 -6 0.22 1.89
 -3 8 5 12.14 2.94
 -3 8 5 21.06 3.68
 3 8 -5 21.13 3.61
 -3 8 4 15.56 3.44
 -3 8 4 18.63 3.22
 -3 8 4 17.15 2.18
 3 8 -4 16.08 2.95
 -3 8 3 30.63 4.27
 -3 8 3 28.06 3.94
 -3 8 3 27.89 2
 3 8 -3 30.77 3.61
 3 8 -3 29.46 2.75
 3 8 -3 32.82 3.34
 -3 8 3 31.12 3.16
 -3 8 2 30.15 4.15
 -3 8 2 33.75 4.12
 -3 8 2 35.86 2.45
 3 8 -2 32.87 2.91
 3 8 -2 29.69 3.25
 3 8 -2 35.75 3.28
 3 8 -1 15.4 2.39
 -3 8 1 14.32 2.75
 -3 8 1 13.84 2.75
 3 8 -1 11.01 2.83
 -3 8 1 14.77 2.11
 3 8 -1 15.31 2.54
 3 8 0 42.03 3.36
 -3 8 0 35.65 3.74
 -3 8 0 45.69 4.46
 3 8 0 44.16 5.37
 -3 8 0 32.59 3.04
 -3 8 -1 41.29 3.79
 3 8 1 43.35 5.36
 -3 8 -1 43.15 3.53
 -3 8 -2 3.54 1.19
 3 8 2 7.78 2.85
 -3 8 -2 6.45 2.15
 -3 8 -3 130.72 5.05
 -3 8 -3 123.83 8.62
 3 8 3 135.08 10.28
 -3 8 -4 57.26 6.01
 3 8 4 66.34 7.53
 3 8 4 45.92 5.42
 3 8 5 25.45 5.21
 3 8 5 37.09 5.51
 -3 8 -5 35.74 5.02
 3 8 6 27.69 5.34
 -3 8 -6 33.58 4.88
 3 8 7 25 5.49
 -3 9 8 19.99 3.96
 -3 9 8 21.63 3.92
 3 9 -8 19.11 4.16
 -3 9 7 60.86 6.67
 -3 9 7 67.31 6.48
 3 9 -7 62.48 6.78
 -3 9 6 87.57 7.75
 -3 9 6 87.01 7.42
 3 9 -6 82.29 7.34
 -3 9 5 116.1 8.99
 -3 9 5 122.53 8.57
 3 9 -5 128.29 8.4
 -3 9 4 17.73 3.78
 -3 9 4 17.18 3.4
 3 9 -4 17.04 3.04
 -3 9 3 105.5 8.14
 -3 9 3 120.04 5.07
 -3 9 3 123.57 8.38
 3 9 -3 114.29 6.98
 3 9 -3 105.77 6.36
 3 9 -3 105.29 5.9
 -3 9 2 171.87 9.78
 -3 9 2 175.39 6.62
 -3 9 2 178.78 9.79
 3 9 -2 156.77 7.05
 3 9 -2 175.22 8.43
 3 9 -2 156.12 7.86
 -3 9 1 58.27 5.37
 3 9 -1 66.6 6.74
 -3 9 1 70.32 5.9
 -3 9 1 59.9 4.13
 3 9 -1 66.21 4.85
 3 9 0 112.89 5.82
 -3 9 0 112.15 6.86
 3 9 0 125.22 9.17
 -3 9 0 115.4 5.63
 -3 9 -1 108.09 6.09
 -3 9 -1 103.37 7.66
 3 9 1 119.41 9.11
 -3 9 -2 56.08 3.87
 3 9 2 54.6 6.47
 -3 9 -2 42.49 4.96
 3 9 3 46.19 6.28
 -3 9 -3 47.78 5.55
 3 9 4 37.06 6.12
 -3 9 -4 39.58 5.19
 3 9 5 33.69 6.02
 3 9 5 28.38 4.87
 -3 9 -5 32.25 4.81
 3 9 6 10.78 3.89
[truncated: 71,250 more chars]
